# Supplementary material for: Base-catalyzed and DMSO-promoted intramolecular hydroalkoxylation to prepare pentacyclic chromeno[4,3-b]indolines
Source: Royal Society of Chemistry journal article supplement (doi:10.1039/d2gc02225g), 2022-01-01

## Supporting Information

### Base-Catalyzed and DMSO-Promoted Intramolecular Hydroalkoxylation to Prepare Pentacyclic Chromeno[4,3-*b*]indolines

Chang-Rui Nie,<sup>†</sup> Hong-Ping Zhao,<sup>†</sup> Wang-Fu Liang, Xin-Xian Zhong\*, Cui Liang, Gui-Fa Su\*, and Dong-Liang Mo\*

<sup>a</sup> *State Key Laboratory for Chemistry and Molecular Engineering of Medicinal Resources, Collaborative Innovation Center for Guangxi Ethnic Medicine, School of Chemistry and Pharmaceutical Sciences, Guangxi Normal University, 15 Yu Cai Road, Guilin 541004, China. E-mail: zhongxx2004@163.com; gfysslx@163.com; moeastlight@mailbox.gxnu.edu.cn*

### Contents

|                                                                                                   |     |
|---------------------------------------------------------------------------------------------------|-----|
| 1. General experimental information                                                               | S2  |
| 2. One-pot synthesis of chromeno[4,3- <i>b</i> ]indolines <b>3a-3y</b>                            | S2  |
| 3. Synthesis of chromeno[4,3- <i>b</i> ]indoline <b>D-3a</b>                                      | S16 |
| 4. Gram-scalable preparation of <b>3a</b>                                                         | S17 |
| 5. Synthesis of chromeno[4,3- <i>b</i> ]indolylmethanol <b>2a</b> , and <b>2aa</b>                | S17 |
| 6. Synthesis of chromeno[4,3- <i>b</i> ]indolylmethanol <b>2z</b>                                 | S19 |
| 7. Continuous <sup>1</sup> H NMR experiments between <b>2a</b> and DMSO                           | S22 |
| 8. Intermediates <b>A</b> , <b>B</b> , or <b>C</b> detected by HRMS (ESI).                        | S22 |
| 9. References                                                                                     | S24 |
| 10. X-ray structure for compound <b>3y</b>                                                        | S24 |
| 11. NMR spectra for compounds <b>3a-3y</b> , <b>2a</b> , <b>2aa</b> , <b>2z</b> , and <b>D-3a</b> | S26 |

## 1. General Experimental Information:

$^1\text{H}$  NMR and  $^{13}\text{C}$  NMR spectra were recorded at ambient temperature using 400 MHz, 600 MHz spectrometers. The data are reported as follows: chemical shift in ppm from internal tetramethylsilane on the  $\delta$  scale, multiplicity (br = broad, s = singlet, d = doublet, t = triplet, q = quartet, m = multiplet), coupling constants (Hz), and integration. High resolution mass spectra were acquired on an LTQ FT spectrometer, and were obtained by peak matching. Melting points are reported uncorrected. Analytical thin layer chromatography was performed on 0.25 mm extra hard silica gel plates with UV254 fluorescent indicator. Chromatography was performed using with 300-400 mesh silica gel ( $\text{SiO}_2$ ). Unless otherwise noted, all reagents and solvents were obtained from commercial sources and, where appropriate, purified prior to use. All reagents and solvents were obtained from commercial sources and, where appropriate, purified prior to use. Indoline **1a-1y**<sup>[1]</sup> were known compounds and prepared according to literature methods, and their spectral data matched literature values.

## 2. One-pot synthesis of chromeno[4,3-b]indolines **3a-3y**

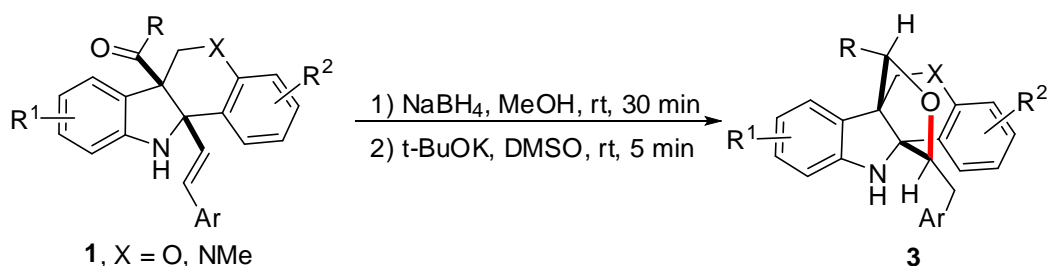

**General procedure A:** In a round-bottom flask was charged with indoline **1** (0.2 mmol) and MeOH (2 mL). And  $\text{NaBH}_4$  (0.4 mmol, 2.0 equiv.) was then added. The reaction mixture was stirred vigorously at room temperature for 30 min until the substrate **1** disappeared (monitored by TLC). At this time, the reaction was diluted with  $\text{H}_2\text{O}$  (10 mL) and extracted with  $\text{Et}_2\text{O}$  (10 mL). The combined organic layers were washed with brine (10 mL), dried over  $\text{Na}_2\text{SO}_4$ , and filtered. The solvent was removed under reduced pressure to give crude alcohol.

In a 25 mL reaction flask was charged with the above crude alcohol, t-BuONa (0.04 mmol, 20 mol%), and DMSO (2.0 mL). The reaction was stirred for 5 min at room temperature until the indoline alcohol was completely consumed (monitored by TLC). At this time, the reaction was quenched with water (10 mL) and extracted with EtOAc (10 mL). The combined organic layers were washed with brine (10 mL), dried over Na<sub>2</sub>SO<sub>4</sub>, and filtered. The solvent was removed under reduced pressure and the crude product was purified by flash column chromatography (PE/EtOAc = 30:1) to afford compounds **3a-3y**.

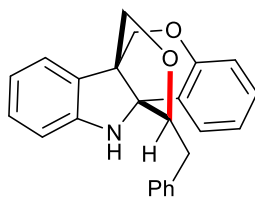

**3a**

**12-Benzyl-6H,11H-6a,11a-(methanooxymethano)chromeno[4,3-b]indole (3a).** A white solid, 0.057 g, 81% yield. Mp: 181–182 °C; <sup>1</sup>H NMR (400 MHz, CDCl<sub>3</sub>): δ 7.28–7.24 (m, 2H), 7.22–7.18 (m, 4H), 7.14–7.06 (m, 2H), 7.05–6.99 (m, 2H), 6.97 (d, *J* = 8.0 Hz, 1H), 6.79–6.76 (m, 1H), 6.67 (d, *J* = 7.6 Hz, 1H), 4.33 (d, *J* = 11.6 Hz, 2H), 4.23 (d, *J* = 8.8 Hz, 1H), 4.07 (d, *J* = 8.8 Hz, 1H), 3.92 (d, *J* = 11.2 Hz, 1H), 3.83 (t, *J* = 6.4 Hz, 1H), 3.13 (d, *J* = 6.4 Hz, 2H); <sup>13</sup>C NMR (100 MHz, CDCl<sub>3</sub>): δ 153.5, 149.9, 138.7, 130.6, 129.1, 128.9, 128.4, 128.1, 126.3, 125.7, 122.9, 122.7, 119.5, 118.1, 109.7, 90.9, 75.3, 72.0, 69.3, 60.1, 36.0; IR (thin film): 3342, 3030, 2928, 2856, 1608, 1491, 1038, 746 cm<sup>-1</sup>; HRMS (ESI) *m/z* calcd for C<sub>24</sub>H<sub>22</sub>NO<sub>2</sub> [M+H]<sup>+</sup>: 356.1651, found 356.1643.

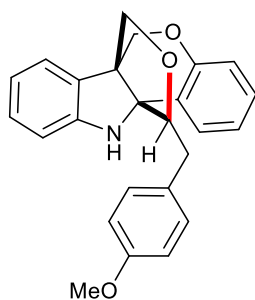

**3b**

**12-(4-Methoxybenzyl)-6H,11H-6a,11a-(methanooxymethano)chromeno[4,3-b]ind**

**ole (3b).** A white solid, 0.008 g, 10% yield. Mp: 174–175 °C; <sup>1</sup>H NMR (400 MHz, CDCl<sub>3</sub>): δ 7.22–7.18 (m, 1H), 7.15–7.08 (m, 4H), 7.05–7.00 (m, 2H), 6.97 (d, *J* = 8.0 Hz, 1H), 6.81–6.79 (m, 2H), 6.77 (d, *J* = 7.2 Hz, 1H), 6.69 (d, *J* = 8.0 Hz, 1H), 4.32 (d, *J* = 11.2 Hz, 2H), 4.22 (d, *J* = 8.8 Hz, 1H), 4.06 (d, *J* = 8.8 Hz, 1H), 3.92 (d, *J* = 11.2 Hz, 1H), 3.81–3.76 (m, 4H), 3.07 (d, *J* = 6.4 Hz, 2H); <sup>13</sup>C NMR (100 MHz, CDCl<sub>3</sub>): δ 158.1, 153.6, 149.9, 130.7, 130.6, 130.0, 128.9, 128.4, 128.2, 125.6, 122.9, 122.7, 119.5, 118.1, 113.8, 109.7, 91.1, 75.3, 72.0, 69.3, 60.1, 55.2, 35.1; IR (thin film): 3470, 3028, 2926, 2857, 1609, 1492, 1087, 762 cm<sup>-1</sup>; HRMS (ESI) *m/z* calcd for C<sub>25</sub>H<sub>24</sub>NO<sub>3</sub> [M+H]<sup>+</sup>: 386.1756, found 386.1747.

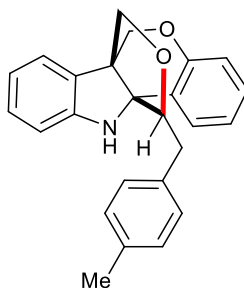

**3c**

**12-(4-Methylbenzyl)-6H,11H-6a,11a-(methanooxymethano)chromeno[4,3-b]indole (3c).** A white solid, 0.037 g, 50% yield. Mp: 182–183 °C; <sup>1</sup>H NMR (400 MHz, CDCl<sub>3</sub>): δ 7.21–7.17 (m, 1H), 7.15 (d, *J* = 7.2 Hz, 1H), 7.11–7.05 (m, 5H), 7.04–6.99 (m, 2H), 6.97 (d, *J* = 8.0 Hz, 1H), 6.78–6.75 (m, 1H), 6.69 (d, *J* = 7.6 Hz, 1H), 4.34 (s, 1H), 4.32 (d, *J* = 11.6 Hz, 1H), 4.21 (d, *J* = 8.8 Hz, 1H), 4.05 (d, *J* = 8.8 Hz, 1H), 3.92 (d, *J* = 11.6 Hz, 1H), 3.80 (t, *J* = 6.4 Hz, 1H), 3.08 (d, *J* = 6.0 Hz, 2H), 2.29 (s, 3H); <sup>13</sup>C NMR (100 MHz, CDCl<sub>3</sub>): δ 153.6, 150.0, 135.9, 135.5, 130.7, 129.1, 129.0, 128.9, 128.4, 128.2, 125.8, 122.9, 122.7, 119.5, 118.1, 109.7, 91.0, 75.3, 72.0, 69.3, 60.1, 35.6, 21.0; IR (thin film): 3343, 3021, 2925, 2856, 1608, 1490, 1263, 1039, 794, 686 cm<sup>-1</sup>; HRMS (ESI) *m/z* calcd for C<sub>25</sub>H<sub>24</sub>NO<sub>2</sub> [M+H]<sup>+</sup>: 370.1802, found 370.1800.

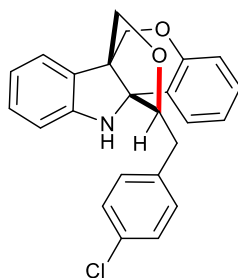

**3d**

**12-(4-Chlorobenzyl)-6H,11H-6a,11a-(methanooxymethano)chromeno[4,3-b]indole (3d).** A white solid, 0.051 g, 65% yield. Mp: 197–198 °C;  $^1\text{H}$  NMR (400 MHz,  $\text{CDCl}_3$ ):  $\delta$  7.23–7.16 (m, 4H), 7.13–7.07 (m, 3H), 7.05–7.01 (m, 2H), 6.97 (d,  $J = 7.6$  Hz, 1H), 6.79 (t,  $J = 7.2$  Hz, 1H), 6.69 (d,  $J = 7.6$  Hz, 1H), 4.31 (d,  $J = 11.2$  Hz, 2H), 4.21 (d,  $J = 8.8$  Hz, 1H), 4.02 (d,  $J = 9.2$  Hz, 1H), 3.89 (d,  $J = 11.2$  Hz, 1H), 3.74 (dd,  $J = 4.4$  Hz, 8.0 Hz, 1H), 3.08 (d,  $J = 8.4$  Hz, 2H);  $^{13}\text{C}$  NMR (100 MHz,  $\text{CDCl}_3$ ):  $\delta$  153.5, 149.9, 137.2, 132.1, 130.7, 130.5, 128.9, 128.5, 128.4, 127.9, 125.4, 122.8, 122.7, 119.7, 118.2, 109.9, 90.7, 75.3, 73.9, 69.1, 60.1, 35.3; IR (thin film): 3371, 3031, 2913, 2356, 1607, 1487, 1299, 1048, 766, 693  $\text{cm}^{-1}$ ; HRMS (ESI)  $m/z$  calcd for  $\text{C}_{24}\text{H}_{21}\text{ClNO}_2$   $[\text{M}+\text{H}]^+$ : 390.1255, found 390.1254.

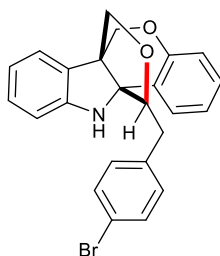

**3e**

**12-(4-Bromobenzyl)-6H,11H-6a,11a-(methanooxymethano)chromeno[4,3-b]indole (3e).** A white solid, 0.044 g, 51% yield. Mp: 198–199 °C;  $^1\text{H}$  NMR (400 MHz,  $\text{CDCl}_3$ ):  $\delta$  7.37–7.35 (m, 2H), 7.24–7.21 (m, 1H), 7.19 (d,  $J = 8.0$  Hz, 1H), 7.12–7.02 (m, 5H), 6.98 (d,  $J = 8.0$  Hz, 1H), 6.80–6.76 (m, 1H), 6.69 (d,  $J = 7.6$  Hz, 1H), 4.32 (d,  $J = 12.0$  Hz, 2H), 4.22 (d,  $J = 9.2$  Hz, 1H), 4.05 (d,  $J = 8.8$  Hz, 1H), 3.90 (d,  $J = 11.6$  Hz, 1H), 3.74 (dd,  $J = 4.0$  Hz, 8.8 Hz, 1H), 3.08 (d,  $J = 8.8$  Hz, 2H);  $^{13}\text{C}$  NMR (100 MHz,  $\text{CDCl}_3$ ):  $\delta$  153.6, 150.0, 137.7, 131.4, 130.9, 130.7, 129.0, 128.6, 127.9, 125.4, 122.9, 122.8, 120.2, 119.7, 118.2, 109.9, 90.6, 75.3, 71.9, 69.3, 60.1, 35.4; IR (thin

film): 3353, 3015, 2925, 2855, 1608, 1490, 1206, 1040, 761, 686  $\text{cm}^{-1}$ ; HRMS (ESI)  $m/z$  calcd for  $\text{C}_{24}\text{H}_{21}\text{BrNO}_2$   $[\text{M}+\text{H}]^+$ : 434.0750, found 434.0749.

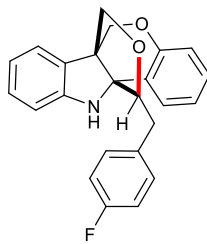

**3f**

**12-(4-Fluorobenzyl)-6H,11H-6a,11a-(methanooxymethano)chromeno[4,3-b]indole (3f).** A white solid, 0.054 g, 73% yield. Mp: 186–187 °C;  $^1\text{H}$  NMR (400 MHz,  $\text{CDCl}_3$ ):  $\delta$  7.24–7.20 (m, 1H), 7.18–7.14 (m, 3H), 7.12–7.08 (m, 1H), 7.05–7.01 (m, 2H), 6.98 (d,  $J = 8.4$  Hz, 1H), 6.95–6.91 (m, 2H), 6.80–6.76 (m, 1H), 6.70 (d,  $J = 8.0$  Hz, 1H), 4.33 (d,  $J = 11.2$  Hz, 2H), 4.22 (d,  $J = 8.8$  Hz, 1H), 4.06 (d,  $J = 9.2$  Hz, 1H), 3.91 (d,  $J = 11.2$  Hz, 1H), 3.76 (t,  $J = 6.0$  Hz, 1H), 3.09 (d,  $J = 6.0$  Hz, 2H);  $^{13}\text{C}$  NMR (100 MHz,  $\text{CDCl}_3$ ):  $\delta$  162.7 (d,  $J = 242.1$  Hz), 153.6, 144.9, 134.4 (d,  $J = 2.9$  Hz), 130.7, 130.5, 130.4, 128.9, 128.5, 128.0, 125.5, 122.9 (d,  $J = 12.4$  Hz), 119.6, 118.2, 115.2 (d,  $J = 21.1$  Hz), 109.8, 90.9, 75.3, 71.9, 69.3, 60.1, 35.1;  $^{19}\text{F}$  NMR (376 MHz,  $\text{CDCl}_3$ ):  $\delta$  -111.4; IR (thin film): 3330, 3043, 2929, 2849, 1606, 1489, 1216, 1062, 747, 693  $\text{cm}^{-1}$ ; HRMS (ESI)  $m/z$  calcd for  $\text{C}_{24}\text{H}_{21}\text{FNO}_2$   $[\text{M}+\text{H}]^+$ : 374.1551, found 374.1545.

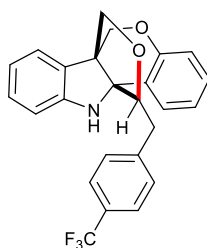

**3g**

**12-(4-(Trifluoromethyl)benzyl)-6H,11H-6a,11a-(methanooxymethano)chromeno[4,3-b]indole (3g).** A white solid, 0.061 g, 73% yield. Mp: 163–164 °C;  $^1\text{H}$  NMR (400 MHz,  $\text{CDCl}_3$ ):  $\delta$  7.50–7.48 (m, 2H), 7.31–7.29 (m, 2H), 7.23–7.18 (m, 2H), 7.12–7.09 (m, 1H), 7.06–7.03 (m, 2H), 6.99 (d,  $J = 8.4$  Hz, 1H), 6.81–6.77 (m, 1H), 6.70 (d,  $J = 7.6$  Hz, 1H), 4.33 (d,  $J = 11.2$  Hz, 2H), 4.23 (d,  $J = 9.2$  Hz, 1H), 4.05 (d,  $J$

= 8.8 Hz, 1H), 3.90 (d,  $J = 11.6$  Hz, 1H), 3.77 (dd,  $J = 3.2$  Hz, 8.8 Hz, 1H), 3.22–3.12 (m, 2H);  $^{13}\text{C}$  NMR (100 MHz,  $\text{CDCl}_3$ ):  $\delta$  153.6, 150.0, 143.0, 130.8, 129.5, 129.1 (q,  $J = 32.1$  Hz), 129.0, 128.6, 128.3 (q,  $J = 270.6$  Hz), 127.9, 125.3, 125.2 (q,  $J = 3.6$  Hz), 122.9, 122.8, 119.8, 118.2, 110.0, 90.5, 75.4, 72.0, 69.4, 60.2, 35.8;  $^{19}\text{F}$  NMR (376 MHz,  $\text{CDCl}_3$ ):  $\delta$  -62.3; IR (thin film): 3353, 3040, 2924, 2854, 1611, 1491, 1208, 1038, 747, 687  $\text{cm}^{-1}$ ; HRMS (ESI)  $m/z$  calcd for  $\text{C}_{25}\text{H}_{21}\text{F}_3\text{NO}_2$   $[\text{M}+\text{H}]^+$ : 424.1519, found 424.1521.

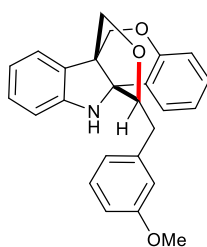

**3h**

**12-(3-Methoxybenzyl)-6H,11H-6a,11a-(methanooxymethano)chromeno[4,3-b]indole (3h).** A white solid, 0.038 g, 49% yield. Mp: 231–232 °C;  $^1\text{H}$  NMR (400 MHz,  $\text{CDCl}_3$ ):  $\delta$  7.22–7.16 (m, 2H), 7.14–7.08 (m, 2H), 7.05–6.99 (m, 2H), 6.97 (d,  $J = 8.0$  Hz, 1H), 6.81 (d,  $J = 6.8$  Hz, 1H), 6.77–6.73 (m, 3H), 6.70 (d,  $J = 8.0$  Hz, 1H), 4.33 (d,  $J = 11.6$  Hz, 2H), 4.23 (d,  $J = 8.8$  Hz, 1H), 4.07 (d,  $J = 9.2$  Hz, 1H), 3.92 (d,  $J = 11.2$  Hz, 1H), 3.83–3.79 (m, 1H), 3.75 (s, 3H), 3.11 (d,  $J = 6.4$  Hz, 2H);  $^{13}\text{C}$  NMR (100 MHz,  $\text{CDCl}_3$ ):  $\delta$  159.6, 153.6, 149.9, 140.3, 130.7, 129.4, 128.9, 128.4, 128.1, 125.7, 122.9, 122.7, 121.5, 119.5, 118.1, 114.9, 111.8, 109.7, 90.8, 75.3, 72.1, 69.3, 60.0, 54.9, 36.1; IR (thin film): 3416, 3028, 2920, 2852, 1619, 1490, 1264, 1022, 737, 692  $\text{cm}^{-1}$ ; HRMS (ESI)  $m/z$  calcd for  $\text{C}_{25}\text{H}_{24}\text{NO}_3$   $[\text{M}+\text{H}]^+$ : 386.1751, found 386.1748.

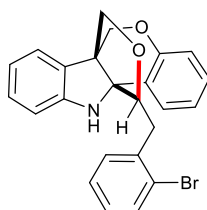

**3i**

**12-(2-Bromobenzyl)-6H,11H-6a,11a-(methanooxymethano)chromeno[4,3-b]indole (3i).** A white solid, 0.065 g, 75% yield. Mp: 272–273 °C;  $^1\text{H}$  NMR (400 MHz,  $\text{CDCl}_3$ ):  $\delta$  7.49 (d,  $J = 8.0$  Hz, 1H), 7.37 (d,  $J = 7.6$  Hz, 1H), 7.32 (d,  $J = 7.2$  Hz, 1H),

7.22–7.18 (m, 2H), 7.13–7.09 (m, 1H), 7.06–7.03 (m, 3H), 6.96 (d,  $J = 8.0$  Hz, 1H), 6.80–6.77 (m, 1H), 6.71 (d,  $J = 7.6$  Hz, 1H), 4.36 (s, 1H), 4.32 (d,  $J = 11.6$  Hz, 1H), 4.22 (d,  $J = 8.8$  Hz, 1H), 4.05 (d,  $J = 9.2$  Hz, 1H), 3.96–3.89 (m, 2H), 3.42–3.39 (m, 1H), 3.15 (dd,  $J = 10.0$  Hz, 14.0 Hz, 1H);  $^{13}\text{C}$  NMR (100 MHz,  $\text{CDCl}_3$ ):  $\delta$  153.5, 150.0, 138.1, 132.7, 131.8, 130.6, 128.9, 128.5, 128.1, 127.7, 127.3, 126.1, 124.5, 122.9, 122.7, 119.6, 118.0, 109.9, 88.8, 75.3, 72.2, 69.3, 60.1, 36.5; IR (thin film): 3470, 3030, 2919, 2850, 1632, 1490, 1227, 1047, 761, 685  $\text{cm}^{-1}$ ; HRMS (ESI)  $m/z$  calcd for  $\text{C}_{24}\text{H}_{21}\text{BrNO}_2$   $[\text{M}+\text{H}]^+$ : 434.0750, found 434.0749.

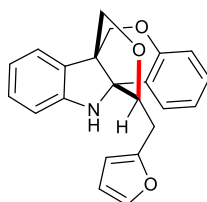

**3j**

**12-(Furan-2-ylmethyl)-6H,11H-6a,11a-(methanooxymethano)chromeno[4,3-b]indole (3j).** A white solid, 0.048 g, 70% yield. Mp: 167–168 °C;  $^1\text{H}$  NMR (400 MHz,  $\text{CDCl}_3$ ):  $\delta$  7.31 (s, 1H), 7.18–7.15 (m, 1H), 7.10–7.06 (m, 1H), 7.04 (d,  $J = 7.2$  Hz, 1H), 6.97–6.93 (m, 2H), 6.88 (d,  $J = 7.2$  Hz, 1H), 6.78–6.74 (m, 1H), 6.67 (d,  $J = 7.6$  Hz, 1H), 6.31 (s, 1H), 6.14 (d,  $J = 2.4$  Hz, 1H), 4.39 (s, 1H), 4.31 (d,  $J = 11.2$  Hz, 1H), 4.23 (d,  $J = 9.2$  Hz, 1H), 4.11 (d,  $J = 8.8$  Hz, 1H), 3.99 (t,  $J = 6.4$  Hz, 1H), 3.90 (d,  $J = 11.6$  Hz, 1H), 3.18 (d,  $J = 6.4$  Hz, 2H);  $^{13}\text{C}$  NMR (100 MHz,  $\text{CDCl}_3$ ):  $\delta$  153.4, 152.2, 149.8, 141.3, 130.3, 129.0, 128.4, 127.9, 125.9, 122.9, 122.7, 119.5, 118.0, 110.5, 109.7, 107.0, 88.4, 74.9, 71.8, 69.0, 60.1, 29.1; IR (thin film): 3339, 3036, 2925, 2856, 1609, 1490, 1208, 1039, 747, 689  $\text{cm}^{-1}$ ; HRMS (ESI)  $m/z$  calcd for  $\text{C}_{22}\text{H}_{20}\text{NO}_3$   $[\text{M}+\text{H}]^+$ : 346.1438, found 346.1434.

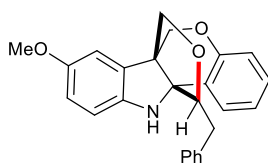

**3k**

**12-Benzyl-8-methoxy-6H,11H-6a,11a-(methanooxymethano)chromeno[4,3-b]indole (3k).** A white solid, 0.041 g, 54% yield. Mp: 145–146 °C;  $^1\text{H}$  NMR (400 MHz,  $\text{CDCl}_3$ ):  $\delta$  7.27–7.17 (m, 6H), 7.16 (d,  $J = 8.4$  Hz, 1H), 7.02–6.98 (m, 1H), 6.96 (d,  $J$



= 8.0 Hz, 1H), 6.69–6.65 (m, 3H), 4.30 (d,  $J = 11.6$  Hz, 1H), 4.22 (d,  $J = 8.8$  Hz, 1H), 4.03 (d,  $J = 8.8$  Hz, 1H), 3.91 (d,  $J = 11.6$  Hz, 1H), 3.81 (s, 1H), 3.75 (s, 3H), 3.17–3.08 (m, 2H);  $^{13}\text{C}$  NMR (100 MHz,  $\text{CDCl}_3$ ):  $\delta$  154.3, 153.4, 143.8, 138.8, 132.5, 129.1, 128.4, 128.3, 126.3, 125.8, 122.7, 118.0, 114.1, 111.1, 109.4, 91.1, 74.9, 72.5, 69.0, 60.3, 55.9, 36.2; IR (thin film): 3337, 3023, 2939, 2846, 1600, 1495, 1226, 1032, 765, 664  $\text{cm}^{-1}$ ; HRMS (ESI)  $m/z$  calcd for  $\text{C}_{25}\text{H}_{24}\text{NO}_3$   $[\text{M}+\text{H}]^+$ : 386.1751, found 386.1748.

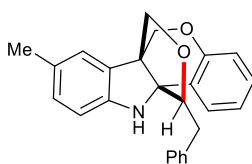

**3l**

**12-Benzyl-8-methyl-6H,11H-6a,11a-(methanooxymethano)chromeno[4,3-b]indole (3l).** A white solid, 0.047 g, 64% yield. Mp: 189–190 °C;  $^1\text{H}$  NMR (400 MHz,  $\text{CDCl}_3$ ):  $\delta$  7.25–7.16 (m, 6H), 7.12 (d,  $J = 6.8$  Hz, 1H), 7.01–6.94 (m, 2H), 6.92 (d,  $J = 7.6$  Hz, 1H), 6.85 (s, 1H), 6.61 (d,  $J = 7.6$  Hz, 1H), 4.29 (d,  $J = 11.2$  Hz, 1H), 4.21 (d,  $J = 8.8$  Hz, 2H), 4.03 (d,  $J = 9.2$  Hz, 1H), 3.90 (d,  $J = 11.6$  Hz, 1H), 3.83 (t,  $J = 6.8$  Hz, 1H), 3.12 (d,  $J = 6.0$  Hz, 2H), 2.26 (s, 3H);  $^{13}\text{C}$  NMR (100 MHz,  $\text{CDCl}_3$ ):  $\delta$  153.4, 147.6, 138.8, 131.0, 129.4, 129.1, 129.0, 128.4, 128.3, 126.3, 125.8, 123.5, 122.7, 118.0, 109.9, 91.0, 75.0, 72.2, 69.2, 60.0, 36.2, 20.8; IR (thin film): 3321, 3022, 2927, 2859, 1615, 1497, 1227, 1074, 758, 697  $\text{cm}^{-1}$ ; HRMS (ESI)  $m/z$  calcd for  $\text{C}_{25}\text{H}_{24}\text{NO}_2$   $[\text{M}+\text{H}]^+$ : 370.1802, found 370.1800.

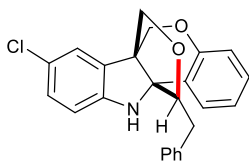

**3m**

**12-Benzyl-8-chloro-6H,11H-6a,11a-(methanooxymethano)chromeno[4,3-b]indole (3m).** A yellow solid, 0.055 g, 71% yield. Mp: 233–234 °C;  $^1\text{H}$  NMR (400 MHz,  $\text{CDCl}_3$ ):  $\delta$  7.27–7.24 (m, 2H), 7.21–7.19 (m, 4H), 7.10 (d,  $J = 7.2$  Hz, 1H), 7.05–7.01 (m, 2H), 6.99–6.95 (m, 2H), 6.59 (d,  $J = 8.0$  Hz, 1H), 4.32 (s, 1H), 4.28 (d,  $J = 11.6$  Hz, 1H), 4.19 (d,  $J = 8.8$  Hz, 1H), 4.02 (d,  $J = 8.8$  Hz, 1H), 3.89 (d,  $J = 11.6$  Hz, 1H),

3.82 (t,  $J = 6.4$  Hz, 1H), 3.11 (d,  $J = 6.0$  Hz, 2H);  $^{13}\text{C}$  NMR (100 MHz,  $\text{CDCl}_3$ ):  $\delta$  153.4, 148.5, 138.4, 132.4, 129.1, 128.8, 128.6, 128.4, 127.6, 126.4, 125.6, 123.9, 123.2, 122.8, 118.2, 110.5, 90.8, 75.1, 72.6, 68.9, 60.2, 36.0; IR (thin film): 3343, 3029, 2923, 2857, 1603, 1486, 1207, 1031, 770, 683  $\text{cm}^{-1}$ ; HRMS (ESI)  $m/z$  calcd for  $\text{C}_{24}\text{H}_{21}\text{ClNO}_2$   $[\text{M}+\text{H}]^+$ : 390.1255, found 390.1250.

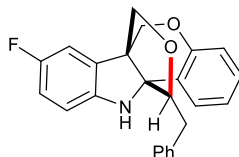

**3n**

**12-Benzyl-8-fluoro-6H,11H-6a,11a-(methanooxymethano)chromeno[4,3-b]indole (3n).** A white solid, 0.045 g, 61% yield. Mp: 209–210 °C;  $^1\text{H}$  NMR (400 MHz,  $\text{CDCl}_3$ ):  $\delta$  7.27–7.21 (m, 6H), 7.14 (d,  $J = 7.6$  Hz, 1H), 7.03–7.00 (m, 1H), 6.97 (d,  $J = 8.0$  Hz, 1H), 6.82–6.75 (m, 2H), 6.62 (dd,  $J = 4.4$  Hz, 8.4 Hz, 1H), 4.28 (d,  $J = 11.2$  Hz, 1H), 4.19 (d,  $J = 8.8$  Hz, 2H), 4.03 (d,  $J = 9.2$  Hz, 1H), 3.91 (d,  $J = 11.2$  Hz, 1H), 3.83 (dd,  $J = 5.2$  Hz, 7.2 Hz, 1H), 3.13 (d,  $J = 4.8$  Hz, 2H);  $^{13}\text{C}$  NMR (100 MHz,  $\text{CDCl}_3$ ):  $\delta$  158.7 (d,  $J = 235.5$  Hz), 153.4, 146.0, 138.6, 132.3 (d,  $J = 7.3$  Hz), 129.1, 128.6, 128.4, 127.9, 126.4, 125.6, 122.8, 118.1, 115.3 (d,  $J = 22.6$  Hz), 110.6 (d,  $J = 8.0$  Hz), 110.3 (d,  $J = 24.1$  Hz), 90.9, 75.0, 72.8, 68.9, 60.3, 36.1;  $^{19}\text{F}$  NMR (376 MHz,  $\text{CDCl}_3$ ):  $\delta$  -124.3; IR (thin film): 3339, 3027, 2923, 2856, 1604, 1490, 1225, 1030, 773, 651  $\text{cm}^{-1}$ ; HRMS (ESI)  $m/z$  calcd for  $\text{C}_{24}\text{H}_{21}\text{FNO}_2$   $[\text{M}+\text{H}]^+$ : 374.1551, found 374.1548.

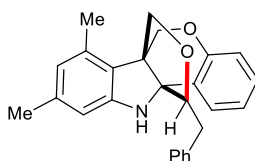

**3o**

**12-Benzyl-7,9-dimethyl-6H,11H-6a,11a-(methanooxymethano)chromeno[4,3-b]indole (3o).** A white solid, 0.057 g, 75% yield. Mp: 163–164 °C;  $^1\text{H}$  NMR (400 MHz,  $\text{DMSO}-d_6$ ):  $\delta$  7.57 (d,  $J = 7.2$  Hz, 1H), 7.20–7.18 (m, 3H), 7.15 (d,  $J = 6.8$  Hz, 1H), 7.08–7.06 (m, 2H), 6.95 (d,  $J = 8.0$  Hz, 1H), 6.72 (s, 1H), 6.17–6.14 (m, 2H), 4.62 (d,  $J = 11.6$  Hz, 1H), 4.20 (d,  $J = 8.8$  Hz, 1H), 3.92 (d,  $J = 8.8$  Hz, 1H), 3.68 (d,  $J = 11.2$  Hz,

2H), 3.03 (d,  $J = 14.4$  Hz, 1H), 2.85 (dd,  $J = 10.4$  Hz, 14.0 Hz, 1H), 2.13 (s, 6H);  $^{13}\text{C}$  NMR (100 MHz, DMSO- $d_6$ ):  $\delta$  153.8, 151.7, 139.7, 138.3, 133.5, 129.4, 129.3, 128.7, 128.6, 127.4, 126.5, 124.9, 122.9, 120.2, 117.7, 106.2, 91.5, 74.4, 72.6, 70.0, 60.3, 35.3, 21.6, 18.8; IR (thin film): 3432, 3029, 2918, 2855, 1654, 1489, 1228, 1027, 764, 697  $\text{cm}^{-1}$ ; HRMS (ESI)  $m/z$  calcd for  $\text{C}_{26}\text{H}_{26}\text{NO}_2$   $[\text{M}+\text{H}]^+$ : 384.1958, found 384.1956.

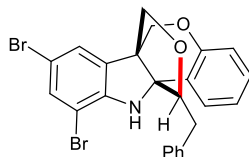

**3p**

**12-Benzyl-8,10-dibromo-6H,11H-6a,11a-(methanooxymethano)chromeno[4,3-b]indole (3p).** A white solid, 0.054 g, 53% yield. Mp: 179–180 °C;  $^1\text{H}$  NMR (400 MHz,  $\text{CDCl}_3$ ):  $\delta$  7.38 (s, 1H), 7.30–7.22 (m, 6H), 7.06 (s, 1H), 7.01–7.00 (m, 2H), 6.98 (d,  $J = 8.0$  Hz, 1H), 4.55 (s, 1H), 4.27 (d,  $J = 11.2$  Hz, 1H), 4.19 (d,  $J = 9.2$  Hz, 1H), 4.04 (d,  $J = 8.8$  Hz, 1H), 3.88 (d,  $J = 11.2$  Hz, 1H), 3.83 (t,  $J = 6.4$  Hz, 1H), 3.12 (d,  $J = 6.4$  Hz, 2H);  $^{13}\text{C}$  NMR (100 MHz,  $\text{CDCl}_3$ ):  $\delta$  153.3, 147.6, 137.9, 133.4, 132.9, 129.2, 128.8, 128.5, 126.9, 126.6, 125.8, 125.0, 123.0, 118.2, 110.2, 102.9, 90.8, 75.0, 72.1, 68.7, 61.6, 35.9; IR (thin film): 3444, 3021, 2920, 2851, 1630, 1493, 1227, 1026, 764, 693  $\text{cm}^{-1}$ ; HRMS (ESI)  $m/z$  calcd for  $\text{C}_{24}\text{H}_{20}\text{Br}_2\text{NO}_2$   $[\text{M}+\text{H}]^+$ : 511.9855, found 511.9855.

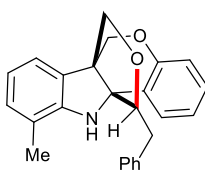

**3q**

**12-Benzyl-10-methyl-6H,11H-6a,11a-(methanooxymethano)chromeno[4,3-b]indole (3q).** A white solid, 0.051 g, 70% yield. Mp: 233–234 °C;  $^1\text{H}$  NMR (400 MHz,  $\text{CDCl}_3$ ):  $\delta$  7.28–7.18 (m, 6H), 7.16 (d,  $J = 7.6$  Hz, 1H), 7.02–7.00 (m, 1H), 6.97–6.93 (m, 2H), 6.91 (d,  $J = 7.2$  Hz, 1H), 6.74–6.71 (m, 1H), 4.32 (d,  $J = 11.2$  Hz, 1H), 4.22 (d,  $J = 8.8$  Hz, 1H), 4.06 (d,  $J = 9.2$  Hz, 1H), 4.03 (s, 1H), 3.90 (d,  $J = 11.6$  Hz, 1H), 3.84 (dd,  $J = 4.4$  Hz, 7.6 Hz, 1H), 3.18 (m, 2H), 2.19 (s, 3H);  $^{13}\text{C}$  NMR (100 MHz,  $\text{CDCl}_3$ ):  $\delta$  153.6, 148.5, 138.7, 130.1, 129.8, 129.2, 128.4, 126.3, 125.8, 122.7, 120.2,

119.9, 119.3, 118.1, 91.0, 75.3, 71.8, 69.4, 60.5, 36.1, 17.0; IR (thin film): 3322, 3028, 2926, 2860, 1602, 1485, 1263, 1039, 752, 699  $\text{cm}^{-1}$ ; HRMS (ESI)  $m/z$  calcd for  $\text{C}_{25}\text{H}_{24}\text{NO}_2$   $[\text{M}+\text{H}]^+$ : 370.1802, found 370.1801.

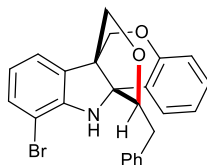

**3r**

**12-Benzyl-10-bromo-6H,11H-6a,11a-(methanooxymethano)chromeno[4,3-b]indole (3r).** A white solid, 0.067 g, 78% yield. Mp: 202–203  $^{\circ}\text{C}$ ;  $^1\text{H}$  NMR (400 MHz,  $\text{CDCl}_3$ ):  $\delta$  7.29–7.19 (m, 7H), 7.04–7.00 (m, 2H), 6.97–6.95 (m, 2H), 6.65–6.61 (m, 1H), 4.56 (s, 1H), 4.31 (d,  $J = 11.2$  Hz, 1H), 4.22 (d,  $J = 9.2$  Hz, 1H), 4.07 (d,  $J = 9.2$  Hz, 1H), 3.89 (d,  $J = 11.2$  Hz, 1H), 3.84 (t,  $J = 6.0$  Hz, 1H), 3.15 (d,  $J = 6.4$  Hz, 2H);  $^{13}\text{C}$  NMR (100 MHz,  $\text{CDCl}_3$ ):  $\delta$  153.4, 148.3, 138.2, 131.5, 131.4, 129.2, 128.6, 128.5, 127.4, 126.5, 125.9, 122.8, 121.7, 120.3, 118.1, 102.7, 90.9, 75.1, 71.6, 69.0, 61.5, 36.0; IR (thin film): 3316, 3028, 2924, 2855, 1601, 1486, 1225, 1044, 761, 656  $\text{cm}^{-1}$ ; HRMS (ESI)  $m/z$  calcd for  $\text{C}_{24}\text{H}_{21}\text{BrNO}_2$   $[\text{M}+\text{H}]^+$ : 434.0750, found 434.0750.

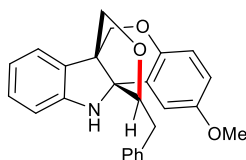

**3s**

**12-Benzyl-2-methoxy-6H,11H-6a,11a-(methanooxymethano)chromeno[4,3-b]indole (3s).** A pink solid, 0.040 g, 52% yield. Mp: 157–158  $^{\circ}\text{C}$ ;  $^1\text{H}$  NMR (400 MHz,  $\text{CDCl}_3$ ):  $\delta$  7.28–7.19 (m, 5H), 7.12–7.08 (m, 1H), 7.03 (d,  $J = 7.2$  Hz, 1H), 6.91 (d,  $J = 8.8$  Hz, 1H), 6.79–6.73 (m, 2H), 6.70 (d,  $J = 7.6$  Hz, 1H), 6.64 (s, 1H), 4.33 (s, 1H), 4.29 (d,  $J = 11.2$  Hz, 1H), 4.22 (d,  $J = 8.8$  Hz, 1H), 4.06 (d,  $J = 9.6$  Hz, 1H), 3.84–3.82 (m, 2H), 3.73 (s, 3H), 3.12 (d,  $J = 6.4$  Hz, 2H);  $^{13}\text{C}$  NMR (100 MHz,  $\text{CDCl}_3$ ):  $\delta$  154.9, 149.9, 147.5, 138.6, 130.7, 129.1, 128.9, 128.8, 128.4, 126.4, 122.9, 119.6, 118.7, 113.7, 111.0, 109.7, 90.8, 75.2, 72.3, 69.5, 60.1, 55.7, 36.1; IR (thin film): 3351, 3030, 2926, 2857, 1606, 1496, 1206, 1039, 745, 698  $\text{cm}^{-1}$ ; HRMS (ESI)  $m/z$  calcd for  $\text{C}_{25}\text{H}_{24}\text{NO}_3$   $[\text{M}+\text{H}]^+$ : 386.1751, found 386.1748.

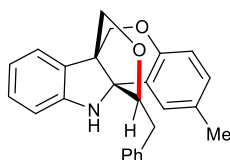

**3t**

**12-Benzyl-2-methyl-6H,11H-6a,11a-(methanooxymethano)chromeno[4,3-b]indole**

(**3t**). A white solid, 0.045 g, 61% yield. Mp: 199–200 °C;  $^1\text{H}$  NMR (400 MHz,  $\text{CDCl}_3$ ):  $\delta$  7.28–7.23 (m, 5H), 7.11–7.08 (m, 1H), 7.04 (d,  $J = 7.2$  Hz, 1H), 6.98 (d,  $J = 8.0$  Hz, 1H), 6.84 (d,  $J = 8.0$  Hz, 1H), 6.78–6.73 (m, 2H), 6.70 (d,  $J = 7.6$  Hz, 1H), 4.33 (s, 1H), 4.29 (d,  $J = 11.2$  Hz, 1H), 4.22 (d,  $J = 8.8$  Hz, 1H), 4.07 (d,  $J = 8.8$  Hz, 1H), 3.87–3.83 (m, 2H), 3.14 (d,  $J = 6.0$  Hz, 2H), 2.23 (s, 3H);  $^{13}\text{C}$  NMR (100 MHz,  $\text{CDCl}_3$ ):  $\delta$  151.3, 149.9, 138.6, 131.9, 130.7, 129.2, 129.0, 128.9, 128.4, 127.7, 126.4, 126.2, 122.8, 119.5, 117.7, 109.7, 90.9, 75.1, 72.1, 69.3, 60.2, 36.2, 20.9; IR (thin film): 3351, 3024, 2925, 2861, 1603, 1498, 1215, 1028, 790, 683  $\text{cm}^{-1}$ ; HRMS (ESI)  $m/z$  calcd for  $\text{C}_{25}\text{H}_{24}\text{NO}_2$   $[\text{M}+\text{H}]^+$ : 370.1802, found: 370.1798.

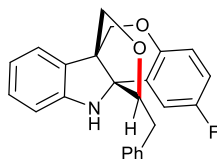

**3u**

**12-Benzyl-2-fluoro-6H,11H-6a,11a-(methanooxymethano)chromeno[4,3-b]indole**

(**3u**). A white solid, 0.049 g, 66% yield. Mp: 189–190 °C;  $^1\text{H}$  NMR (400 MHz,  $\text{CDCl}_3$ ):  $\delta$  7.29–7.21 (m, 5H), 7.13–7.09 (m, 1H), 7.03 (d,  $J = 7.2$  Hz, 1H), 6.93–6.85 (m, 2H), 6.79–6.76 (m, 1H), 6.70–6.68 (m, 2H), 4.31 (d,  $J = 11.2$  Hz, 2H), 4.22 (d,  $J = 8.8$  Hz, 1H), 4.06 (d,  $J = 8.8$  Hz, 1H), 3.83–3.78 (m, 2H), 3.14–3.03 (m, 2H);  $^{13}\text{C}$  NMR (100 MHz,  $\text{CDCl}_3$ ):  $\delta$  159.1 (d,  $J = 239.1$  Hz), 149.7, 149.6 (d,  $J = 2.2$  Hz), 138.2, 130.4, 129.4 (d,  $J = 7.3$  Hz), 129.1, 129.0, 128.5, 126.6, 122.9, 119.7, 119.3 (d,  $J = 8.0$  Hz), 115.3 (d,  $J = 23.3$  Hz), 112.5 (d,  $J = 23.3$  Hz), 109.7, 90.8, 75.3, 72.2, 69.6, 60.2, 35.9;  $^{19}\text{F}$  NMR (376 MHz,  $\text{CDCl}_3$ ):  $\delta$  -119.6; IR (thin film): 3378, 3030, 2926, 2856, 1605, 1490, 1258, 1016, 732, 698  $\text{cm}^{-1}$ ; HRMS (ESI)  $m/z$  calcd for  $\text{C}_{24}\text{H}_{21}\text{FNO}_2$   $[\text{M}+\text{H}]^+$ : 374.1551, found 374.1547.

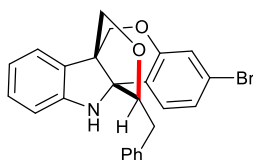

**3v**

**12-Benzyl-3-bromo-6H,11H-6a,11a-(methanooxymethano)chromeno[4,3-b]indole (3v).** A white solid, 0.061 g, 71% yield. Mp: 183–184 °C; <sup>1</sup>H NMR (400 MHz, CDCl<sub>3</sub>): δ 7.29–7.25 (m, 2H), 7.21–7.19 (m, 3H), 7.12–7.09 (m, 3H), 7.03 (d, *J* = 7.2 Hz, 1H), 6.88 (d, *J* = 8.0 Hz, 1H), 6.80–6.76 (m, 1H), 6.70 (d, *J* = 8.0 Hz, 1H), 4.31 (d, *J* = 11.2 Hz, 2H), 4.21 (d, *J* = 8.8 Hz, 1H), 4.03 (d, *J* = 8.8 Hz, 1H), 3.89 (d, *J* = 11.6 Hz, 1H), 3.80 (dd, *J* = 4.4 Hz, 8.0 Hz, 1H), 3.14–3.03 (m, 2H); <sup>13</sup>C NMR (100 MHz, CDCl<sub>3</sub>): δ 154.3, 149.7, 138.3, 130.2, 129.1, 129.0, 128.5, 127.3, 127.2, 126.5, 125.7, 122.9, 121.3, 121.2, 119.7, 109.8, 90.8, 75.1, 71.9, 69.3, 60.0, 36.1; IR (thin film): 3347, 3028, 2921, 2860, 1607, 1489, 1262, 1010, 743, 696 cm<sup>-1</sup>; HRMS (ESI) *m/z* calcd for C<sub>24</sub>H<sub>21</sub>BrNO<sub>2</sub> [M+H]<sup>+</sup>: 434.0750, found 434.0749.

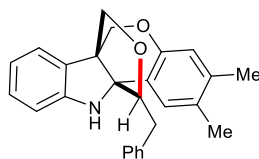

**3w**

**12-Benzyl-2,3-dimethyl-6H,11H-6a,11a-(methanooxymethano)chromeno[4,3-b]indole (3w).** A white solid, 0.060 g, 78% yield. Mp: 197–198 °C; <sup>1</sup>H NMR (400 MHz, CDCl<sub>3</sub>): δ 7.30–7.19 (m, 5H), 7.10–7.06 (m, 1H), 7.03 (d, *J* = 7.2 Hz, 1H), 6.78 (d, *J* = 7.6 Hz, 1H), 6.74–6.72 (m, 1H), 6.69–6.67 (m, 2H), 4.28 (s, 1H), 4.26 (d, *J* = 11.2 Hz, 1H), 4.20 (d, *J* = 8.8 Hz, 1H), 4.04 (d, *J* = 8.8 Hz, 1H), 3.89–3.85 (m, 2H), 3.15 (d, *J* = 6.0 Hz, 2H), 2.18 (s, 3H), 2.13 (s, 3H); <sup>13</sup>C NMR (100 MHz, CDCl<sub>3</sub>): δ 151.3, 150.0, 138.7, 137.0, 130.7, 130.6, 129.3, 128.8, 128.4, 126.7, 126.4, 125.1, 122.8, 119.4, 118.7, 109.7, 90.9, 75.0, 71.9, 69.1, 59.9, 36.4, 19.5, 19.2; IR (thin film): 3335, 3026, 2925, 2855, 1605, 1492, 1262, 1033, 739, 681 cm<sup>-1</sup>; HRMS (ESI) *m/z* calcd for C<sub>26</sub>H<sub>26</sub>NO<sub>2</sub> [M+H]<sup>+</sup>: 384.1958, found 384.1953.

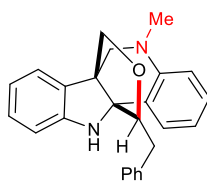

**3x**

**12-Benzyl-5-methyl-5,6-dihydro-11H-6a,11a-(methanooxymethano)indolo[3,2-c]quinoline (3x).** A white solid, 0.038 g, 52% yield. Mp: 187–188 °C;  $^1\text{H}$  NMR (400 MHz,  $\text{CDCl}_3$ ):  $\delta$  7.22–7.15 (m, 7H), 7.08–7.04 (m, 1H), 6.99 (d,  $J = 6.8$  Hz, 1H), 6.89–6.85 (m, 1H), 6.78 (d,  $J = 8.4$  Hz, 1H), 6.74–6.71 (m, 1H), 6.67 (d,  $J = 7.6$  Hz, 1H), 4.42 (s, 1H), 4.17 (d,  $J = 8.4$  Hz, 1H), 4.10 (d,  $J = 8.8$  Hz, 1H), 3.65 (dd,  $J = 3.6$  Hz, 8.4 Hz, 1H), 3.25 (d,  $J = 11.2$  Hz, 1H), 3.10–3.01 (m, 2H), 2.93 (d,  $J = 11.2$  Hz, 1H), 2.84 (s, 3H);  $^{13}\text{C}$  NMR (100 MHz,  $\text{CDCl}_3$ ):  $\delta$  149.9, 146.5, 139.2, 133.2, 129.0, 128.7, 128.4, 128.2, 127.9, 126.1, 125.1, 122.6, 119.1, 119.0, 112.6, 109.3, 90.7, 77.2, 73.1, 61.6, 57.7, 39.8, 35.3; IR (thin film): 3362, 3029, 2923, 2853, 1608, 1497, 1255, 1034, 761, 693  $\text{cm}^{-1}$ ; HRMS (ESI)  $m/z$  calcd for  $\text{C}_{25}\text{H}_{25}\text{N}_2\text{O}$   $[\text{M}+\text{H}]^+$ : 369.1961, found 369.1957.

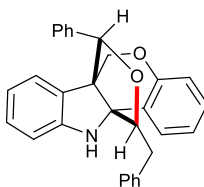

**3y**

**12-Benzyl-14-phenyl-6H,11H-6a,11a-(methanooxymethano)chromeno[4,3-b]indole (3y, dr > 20:1).** A white solid, 0.066 g, 77% yield. Mp: 100–101 °C;  $^1\text{H}$  NMR (400 MHz,  $\text{CDCl}_3$ ):  $\delta$  7.42–7.40 (m, 2H), 7.36–7.26 (m, 8H), 7.13 (t,  $J = 7.2$  Hz, 1H), 7.05–7.01 (m, 2H), 6.84 (dd,  $J = 7.6$  Hz, 12.0 Hz, 2H), 6.73–6.71 (m, 2H), 6.66 (d,  $J = 7.6$  Hz, 1H), 5.18 (s, 1H), 4.90 (d,  $J = 6.8$  Hz, 1H), 4.16 (s, 1H), 3.93 (dd,  $J = 12.0$  Hz, 15.6 Hz, 2H), 3.41 (d,  $J = 6.0$  Hz, 2H);  $^{13}\text{C}$  NMR (100 MHz,  $\text{CDCl}_3$ ):  $\delta$  152.8, 149.1, 138.9, 136.4, 129.6, 128.9, 128.5, 128.3, 128.2, 128.2, 127.9, 127.7, 126.4, 126.1, 123.4, 122.1, 119.3, 117.6, 110.6, 88.7, 85.3, 76.7, 65.1, 59.3, 38.9; IR (thin film): 3365, 2961, 2926, 2856, 1609, 1490, 1261, 1092, 1017, 804, 764, 689  $\text{cm}^{-1}$ ; HRMS (ESI)  $m/z$  calcd for  $\text{C}_{30}\text{H}_{26}\text{NO}_2$   $[\text{M}+\text{H}]^+$ : 432.1958, found 432.1948.

### 3. Synthesis of chromeno[4,3-b]indoline **D-3a**

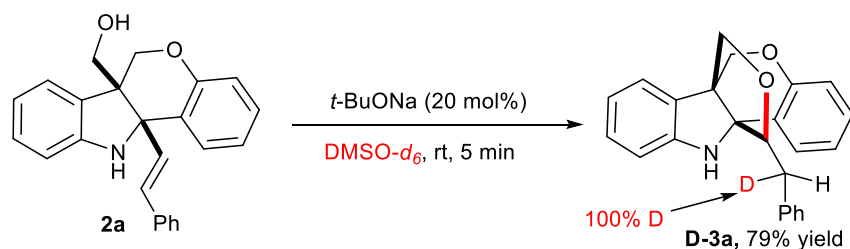

In a 25 mL reaction flask was charged with **2a** (71 mg, 0.2 mmol),  $t\text{-BuONa}$  (3.8 mg, 0.04 mmol, 20 mol%), and  $\text{DMSO-}d_6$  (2.0 mL). The reaction was stirred for 5 min at room temperature until **2a** was completely consumed (monitored by TLC). At this time, the reaction was quenched with water (10 mL) and extracted with EtOAc (10 mL). The combined organic layers were washed with brine (10 mL), dried over  $\text{Na}_2\text{SO}_4$ , and filtered. The solvent was removed under reduced pressure and the crude product was purified by flash column chromatography (PE/EtOAc = 30:1) to afford compound **D-3a**.

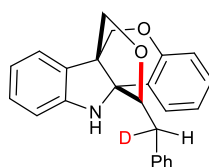

**D-3a**

**12-(Phenylmethyl-d)-6H,11H-6a,11a-(methanooxymethano)chromeno[4,3-b]indoline (**D-3a**)**. A white solid, 0.056 g, 79% yield. Mp: 184–185 °C;  $^1\text{H}$  NMR (400 MHz,  $\text{CDCl}_3$ ):  $\delta$  7.28–7.24 (m, 2H), 7.21–7.17 (m, 4H), 7.12–7.08 (m, 2H), 7.04–6.98 (m, 2H), 6.97 (d,  $J = 8.0$  Hz, 1H), 6.79–6.75 (m, 1H), 6.70 (d,  $J = 7.6$  Hz, 1H), 4.34 (s, 1H), 4.32 (d,  $J = 11.6$  Hz, 1H), 4.23 (d,  $J = 8.8$  Hz, 1H), 4.06 (d,  $J = 9.2$  Hz, 1H), 3.91 (d,  $J = 11.6$  Hz, 1H), 3.82 (d,  $J = 9.6$  Hz, 1H), 3.11 (d,  $J = 8.8$  Hz, 1H);  $^{13}\text{C}$  NMR (100 MHz,  $\text{CDCl}_3$ ):  $\delta$  153.5, 149.9, 138.6, 130.6, 129.1, 128.9, 128.4, 128.1, 126.4, 125.7, 122.9, 122.7, 119.5, 118.1, 109.7, 90.9, 75.3, 72.0, 69.3, 60.1, 35.9 (t,  $J = 18.9$  Hz); IR (thin film): 3343, 3032, 2925, 2862, 1606, 1495, 1209, 1039, 750, 688  $\text{cm}^{-1}$ ; HRMS (ESI)  $m/z$  calcd for  $\text{C}_{24}\text{H}_{21}\text{DNO}_2$   $[\text{M}+\text{H}]^+$ : 357.1708, found 357.1703.



#### 4. Gram-scalable preparation of **3a**

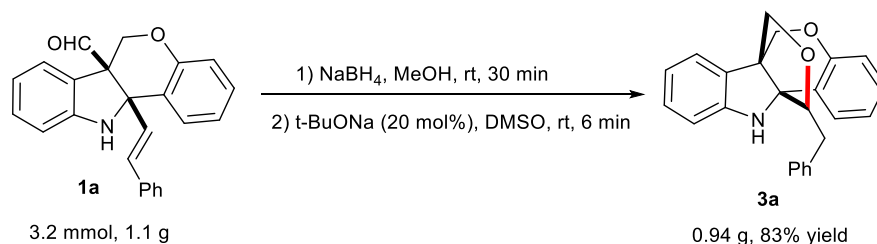

In a 100 mL-round-bottle flask was charged with **1a** (1.1 g, 3.2 mmol) and MeOH (30 mL). NaBH<sub>4</sub> (243 mg, 6.4 mmol, 2.0 equiv.) was then added in three portions. The reaction mixture was stirred vigorously at room temperature for 30 min until the substrate **1** disappeared (monitored by TLC). At this time, the reaction was diluted with H<sub>2</sub>O (30 mL), and extracted with Et<sub>2</sub>O (100 mL). The combined organic layers were washed with brine (30 mL), dried over Na<sub>2</sub>SO<sub>4</sub>, and filtered. The solvent was removed under reduced pressure to give crude alcohol.

In a 100 mL-round-bottle flask was charged with the above alcohol, t-BuONa (0.64 mmol, 20 mol%), and DMSO (30.0 mL). The reaction was stirred at room temperature for 6 min until the alcohol was completely consumed (monitored by TLC). At this time, the reaction was quenched with water (50 mL) to precipitate solid. Finally, the solid was recrystallized with petroleum ether to afford **3a** (0.94 g, 83% yield) as a white solid.

#### 5. Synthesis of chromeno[4,3-*b*]indolylmethanol **2a** and **2aa**

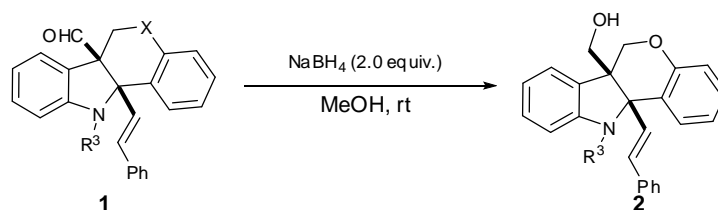

**General procedure B:** In a 25 mL round-bottle flask was charged with **1** (1.0 mmol) and MeOH (10 mL). NaBH<sub>4</sub> (2.0 mmol, 2.0 equiv.) was added. Then, the reaction mixture was stirred vigorously at room temperature for 30 min until the substrate **1** disappeared (monitored by TLC). At this time, the reaction was diluted with H<sub>2</sub>O (20 mL) and extracted with Et<sub>2</sub>O (30 mL). The combined organic layers were washed with

brine (20 mL), dried over Na<sub>2</sub>SO<sub>4</sub>, and filtered. The solvent was removed the reduced pressure and the crude product was purified by column chromatography (1/20 to 1/6, ethyl acetate / petroleum ether) to afford **2**.

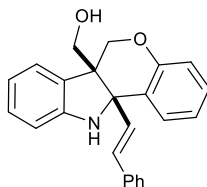

**2a**

**11a-((E)-styryl)-11,11a-dihydrochromeno[4,3-b]indol-6a(6H)-ylmethanol (2a).** A canary yellow solid, 0.3540 g, 99% yield. Mp: 87–88 °C; <sup>1</sup>H NMR (400 MHz, CDCl<sub>3</sub>): δ 7.47 (d, *J* = 7.6 Hz, 1H), 7.33–7.27 (m, 3H), 7.25–7.20 (m, 3H), 7.17–7.13 (m, 3H), 7.10 (t, *J* = 7.2 Hz, 1H), 7.01 (d, *J* = 8.4 Hz, 1H), 6.92 (t, *J* = 7.6 Hz, 1H), 6.72 (d, *J* = 4.0 Hz, 1H), 4.63 (d, *J* = 12.4 Hz, 1H), 3.92 (dd, *J* = 11.6 Hz, 16.8 Hz, 2H), 3.76 (d, *J* = 11.2 Hz, 1H), 2.55 (d, *J* = 13.6 Hz, 1H), 2.21 (t, *J* = 12.4 Hz, 1H), 1.26 (s, 1H); <sup>13</sup>C NMR (100 MHz, CDCl<sub>3</sub>): δ 154.7, 148.7, 136.2, 131.2, 130.3, 128.9, 128.7, 128.3, 128.2, 127.9, 127.5, 126.6, 124.3, 121.8, 119.6, 117.4, 110.3, 68.9, 66.0, 64.1, 52.9; IR (thin film): 3595, 3355, 3051, 2933, 2862, 1608, 1486, 1223, 1024, 761, 745, 693 cm<sup>-1</sup>; HRMS (ESI) *m/z* calcd for C<sub>24</sub>H<sub>22</sub>NO<sub>2</sub> [M+H]<sup>+</sup>: 356.1645, found 356.1659.

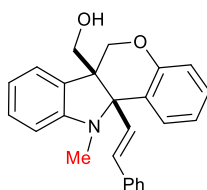

**2aa**

**11-Methyl-11a-((E)-styryl)-11,11a-dihydrochromeno[4,3-b]indol-6a(6H)-ylmethanol (2aa).** A white solid, 0.360 g, 98% yield. Mp: 155–156 °C; <sup>1</sup>H NMR (400 MHz, CDCl<sub>3</sub>): δ 7.26–7.23 (m, 5H), 7.18–7.17 (m, 2H), 7.16–7.06 (m, 2H), 6.90–6.83 (m, 2H), 6.67 (t, *J* = 7.2 Hz, 1H), 6.37–6.27 (m, 3H), 4.29 (d, *J* = 11.2 Hz, 1H), 4.12 (d, *J* = 11.2 Hz, 1H), 3.87 (d, *J* = 11.2 Hz, 1H), 3.74 (d, *J* = 11.2 Hz, 1H), 2.79 (s, 3H); <sup>13</sup>C NMR (100 MHz, CDCl<sub>3</sub>): δ 155.6, 150.5, 136.1, 134.7, 131.0, 129.0, 128.9, 128.6, 128.0, 126.6, 123.9, 122.1, 120.4, 117.8, 117.7, 106.3, 73.2, 66.8, 63.7, 52.9, 29.8; IR

(thin film): 3588, 3032, 2919, 2878, 1606, 1488, 1223, 1024, 766, 743  $\text{cm}^{-1}$ ; HRMS (ESI)  $m/z$  calcd for  $\text{C}_{25}\text{H}_{24}\text{NO}_2$   $[\text{M}+\text{H}]^+$ : 370.1802, found 370.1795.

## 6. Synthesis of chromeno[4,3-*b*]indolylmethanol **2z**

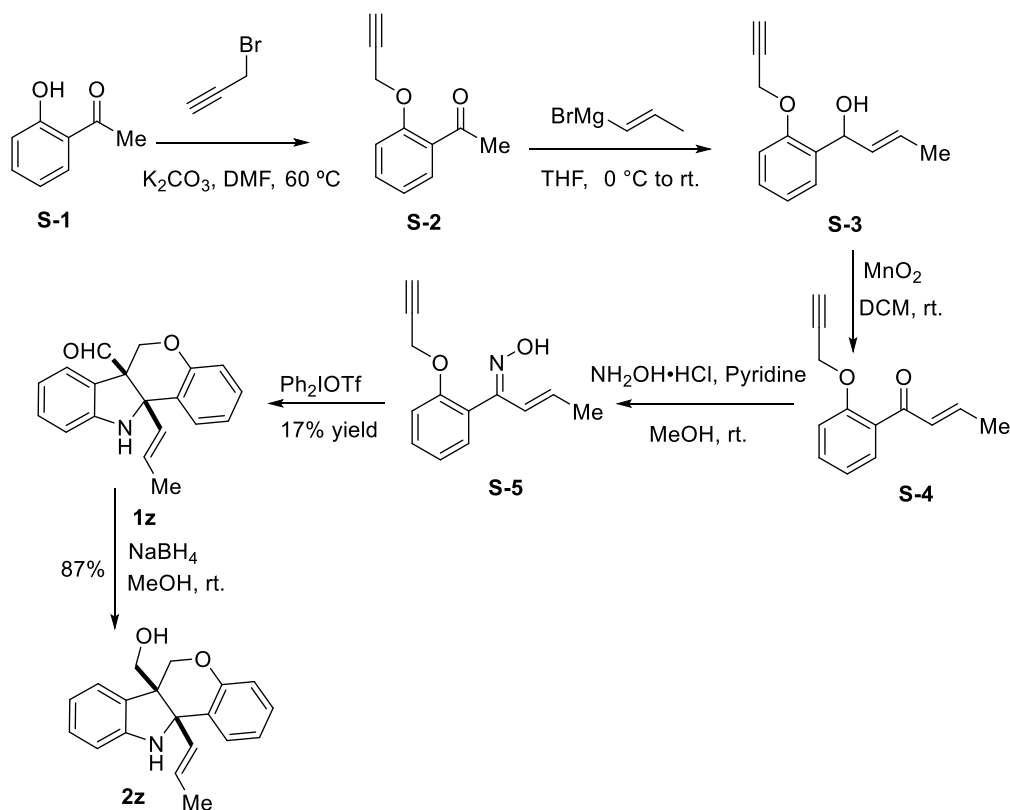

### Synthetic procedure:

To a well stirred solution of anhydrous DMF (25 mL) was added **S-1** (10.0 mmol),  $\text{K}_2\text{CO}_3$  (1.67 g, 12.0 mmol, 1.2 equiv.) and allylbromide (0.93 mL, 12.0 mmol, 1.2 equiv.). The reaction mixture was stirred at  $60\text{ }^\circ\text{C}$  for 12 h (monitored by TLC) before it was slowly poured into water. Extracted with  $\text{Et}_2\text{O}$  (30 mL), then the combined organic layers were washed with brine (30 mL), dried over  $\text{Na}_2\text{SO}_4$ , and filtered. The solvent was removed under reduced pressure to give product **S-2** as a yellow solid, which was used directly without purification for the next step.

To a solution of **S-2** (10.0 mmol) in THF (10 mL) at  $0\text{ }^\circ\text{C}$  was added slowly a solution of Grignard reagent magnesium bromide (20.0 mmol, 2.0 equiv.). The resulting mixture was allowed to warm to room temperature and stirred for 2 h. Upon completion, the reaction mixture was quenched by addition of an aqueous saturated

solution of NH<sub>4</sub>Cl (30 mL) and extracted with ethyl acetate (3×50 mL). The combined organic layers were washed with brine (30 mL), dried over Na<sub>2</sub>SO<sub>4</sub> and filtered. The solvent was removed under reduced pressure and the crude product was purified by flash column chromatography (1/30 to 1/10, dichloromethane/petroleum ether) to afford **S-3** (74%, 1.48 g) as yellow oil.

The yellow oil **S-3** (7.4 mmol, 1.48 g) was dissolved in DCM (15mL) and MnO<sub>2</sub> (6.5 g, 74.0 mmol, 10.0 equiv.) was added under vigorous stirring. After complete conversion (TLC analysis), the mixture was filtered through a Celite pad washing with DCM. The solvent was removed under reduced pressure and the crude product was purified by flash column chromatography (1/30 to 1/10, dichloromethane/petroleum ether) to afford **S-4** (28%, 0.82g) as yellow oil.

To a solution of **S-4** (2.0 mmol, 0.82g) in MeOH (10 mL) was added hydroxylamine hydrochloride (0.21g, 3.0 mmol, 1.5 equiv.) and pyridine (0.4 mL, 5.0 mmol, 2.5 equiv.). The reaction mixture was then stirred at room temperature until the **S-6** was consumed. The solvent was evaporated and the residue was diluted with water (10 mL) and extracted with ethyl acetate (3×10 mL). The combined organic layers were washed with brine (10 mL), dried over Na<sub>2</sub>SO<sub>4</sub>, and concentrated. Purification of the crude product by flash column chromatography (1/20 to 1/6, ethyl acetate/petroleum ether) afforded the corresponding oxime **S-5** (17%, 0.072 g) as yellow oil. *One isomer*: <sup>1</sup>H NMR (400 MHz, CDCl<sub>3</sub>): δ 7.38–7.37 (m, 1H), 7.26–7.21 (m, 1H), 7.08–7.07 (m, 2H), 7.00 (d, *J* = 6.8 Hz, 1H), 5.81–5.76 (m, 1H), 4.69 (d, *J* = 2.0 Hz, 2H), 2.45 (s, 1H), 1.84 (d, *J* = 6.0 Hz, 3H); <sup>13</sup>C NMR (100 MHz, CDCl<sub>3</sub>): δ 156.6, 134.6, 129.9, 129.6, 124.9, 121.6, 120.5, 113.5, 78.7, 75.4, 56.4, 18.7; *another isomer*: <sup>1</sup>H NMR (400 MHz, CDCl<sub>3</sub>): δ, 7.35–7.30 (m, 1H), 7.15–7.13 (m, 1H), 7.05–7.02 (m, 2H), 6.38 (d, *J* = 14.8 Hz, 1H), 5.64–5.58 (m, 1H), 4.67 (d, *J* = 2.4 Hz, 2H), 2.44 (s, 1H), 1.78 (d, *J* = 6.0 Hz, 3H); <sup>13</sup>C NMR (100MHz, CDCl<sub>3</sub>): δ 156.6, 131.3, 129.8, 128.0, 122.4, 121.5, 120.5, 113.1, 78.6, 75.4, 56.1, 18.3; IR (thin film) 3281, 3072, 2862, 1600, 1498, 1329, 968, 756 cm<sup>-1</sup>HRMS (ESI) *m/z* calcd for C<sub>13</sub>H<sub>14</sub>NO<sub>2</sub> [M + H]<sup>+</sup>: 216.1019, found: 216.1017.

In a round-bottle flask was charged with **S-5** (0.34 mmol, 0.072 g), diphenyliodonium triflate (0.68 mmol, 0.2914 g, 2.0 equiv.), KOH (0.68 mmol, 0.038 g, 2.0 equiv.) and CCl<sub>4</sub> (4 mL). And then, the reaction mixture was stirred vigorously at room temperature for 3 h until the substrate **S-5** disappeared (monitored by TLC). Then heating at 80 °C for 6 h. At this time, the solvent was removed under reduced pressure to give the crude product **1z** as yellow solid.

In a round-bottle flask charged with the above crude **1z** (0.1 mmol, 0.029 g) and MeOH (1 mL), NaBH<sub>4</sub> (0.2 mmol, 0.014 g 2.0 equiv.) was added. Then, the reaction mixture was stirred vigorously at room temperature for 0.5 h until the substrate **1z** disappeared (monitored by TLC). At this time, the reaction was diluted with H<sub>2</sub>O (10 mL) and extracted with Et<sub>2</sub>O (20 mL). The combined organic layers were washed with brine (10 mL), dried over Na<sub>2</sub>SO<sub>4</sub> and filtered. Purification of the crude product by flash column chromatography (1/10 to 1/6, ethyl acetate/petroleum ether) afforded indoline **2z**.

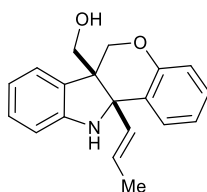

**2z**

**(11a-(Prop-1-en-1-yl)-11,11a-dihydrochromeno[4,3-b]indol-6a(6H)-yl)methanol(2z)**. A yellow solid, 0.026 g, 87% yield. Mp: 112–113°C; <sup>1</sup>H NMR (400 MHz, CDCl<sub>3</sub>): δ 7.25–7.23 (m, 1H), 7.14–7.03 (m, 3H), 6.94 (t, *J* = 7.2 Hz, 1H), 6.80–6.75 (m, 2H), 6.60 (d, *J* = 7.6 Hz, 1H), 5.89–5.74 (m, 2H), 4.56 (d, *J* = 11.6 Hz, 1H), 4.19 (s, 1H), 4.14 (d, *J* = 11.2 Hz, 1H), 3.76 (d, *J* = 11.2 Hz, 1H), 3.63 (d, *J* = 9.6 Hz, 1H), 1.79 (d, *J* = 6.0 Hz, 3H), 1.69 (s, 1H); <sup>13</sup>C NMR (100 MHz, CDCl<sub>3</sub>): δ 154.7, 148.9, 131.8, 128.7, 128.4, 128.3, 128.0, 127.8, 124.2, 121.6, 119.4, 117.2, 110.1, 68.5, 65.8, 64.1, 52.3, 17.8; IR (thin film): 3589, 3029, 2920, 2868, 1605, 1485, 1213, 1034, 765, 743 cm<sup>-1</sup>; HRMS (ESI) *m/z* calcd for C<sub>19</sub>H<sub>20</sub>NO<sub>2</sub>[M+H]<sup>+</sup> 294.1489, found 294.1489.

## 7. Continuous $^1\text{H}$ NMR experiments between **2a** and DMSO

The interaction between indoline **2a** with DMSO was examined by continuous  $^1\text{H}$  NMR experiments. When **2a** was dissolved in  $\text{CDCl}_3$ , a broad single peak corresponding to N-H of indoline appeared at 4.26 ppm. The N-H peak was shifted to 4.31 ppm after the addition of 1.0 equiv of DMSO to **2a**. Interestingly, further increasing the amounts of DMSO to 5.0, 10.0, and 20.0 equiv. to **2a** in  $\text{CDCl}_3$  obviously showed that the N-H peak was shifted from 4.31 ppm to 4.58 ppm. These results revealed that the DMSO interacted with **2a** might be through hydrogen-bonding activation.

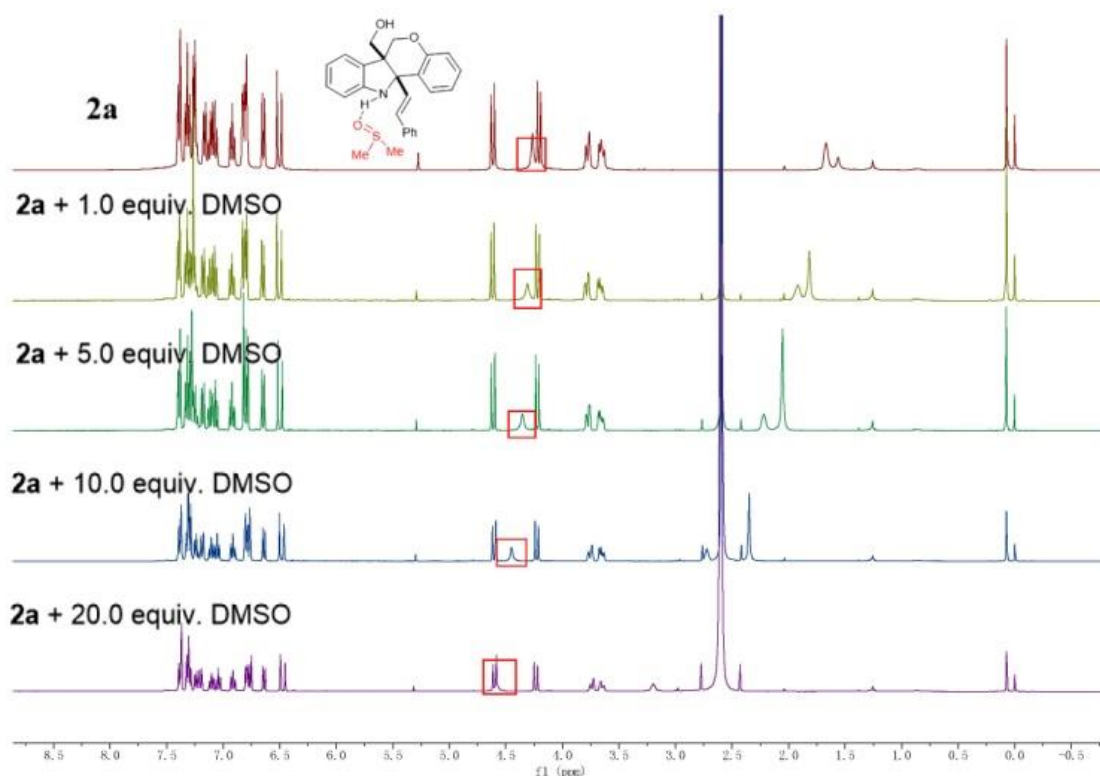

## 8. Intermediates A, B, or C detected by HRMS (ESI).

1) When **2a** (0.1 mmol) were added in DMSO (1.0 mL), and the reaction mixture stirred for 3 min. The reaction mixture was directly detected by HRMS (ESI, diluted

with MeOH). The HRMS for intermediate calculated for  $C_{26}H_{28}NO_3S$   $[M+H]^+$ : 434.1784; found 434.1787.

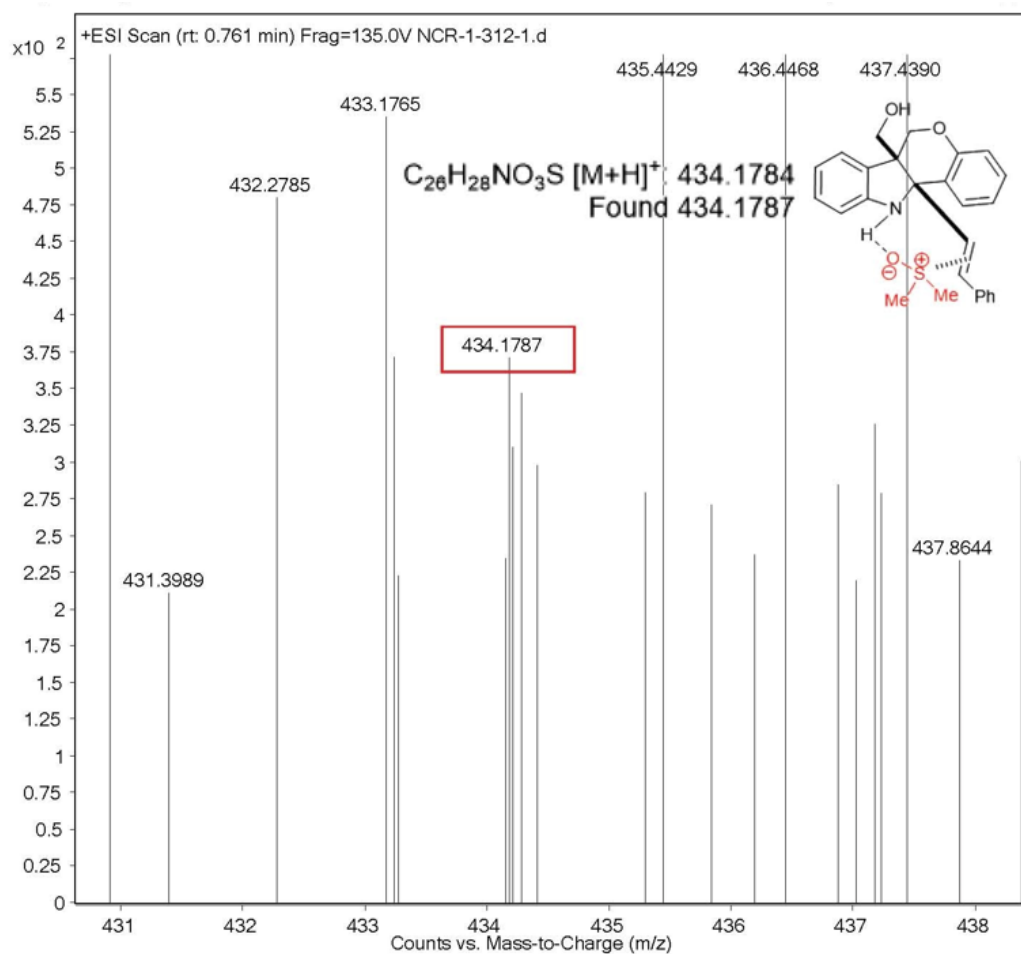

2) When *t*-BuONa (20 mol%) and **2a** (0.1 mmol), were added in DMSO (1.0 mL), and the reaction mixture stirred for 3 min. The reaction mixture was directly detected by HRMS (ESI, diluted with MeOH). The HRMS (ESI) calculated for  $C_{26}H_{26}NO_3S^+$ : 432.1639; found 432.1646. However, we cannot confirm that the peak we found belongs to which intermediates **A**, **B**, or **C** owing to the same molecular weight of **A**, **B** or **C**.

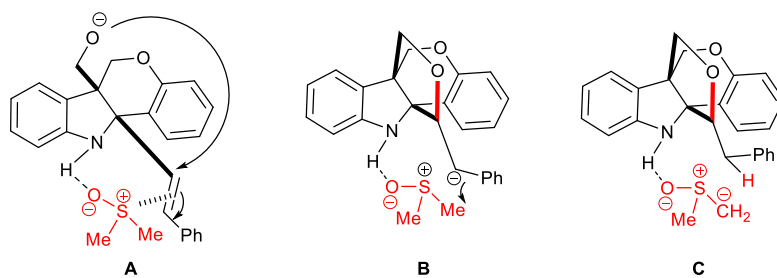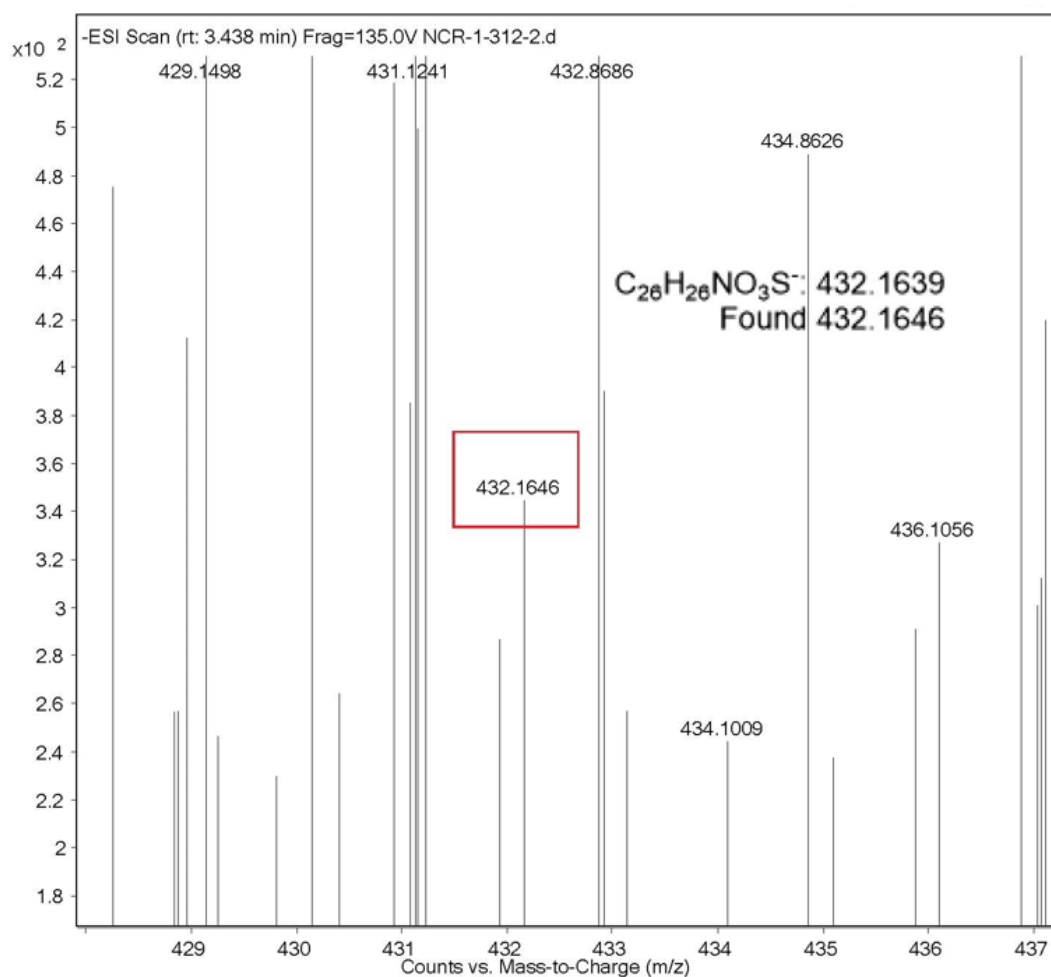

## 9. References

[1]. Ma, X.-P.; Li, K.; Wu, S.-Y.; Liang, C.; Su, G.-F.; Mo, D.-L. *Green Chem.*, **2017**, *19*, 5761-5766.

## 10. X-ray structure for compound 3y



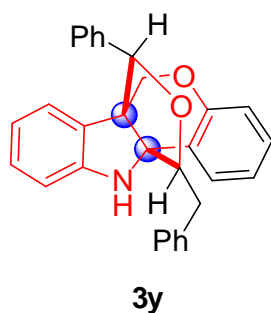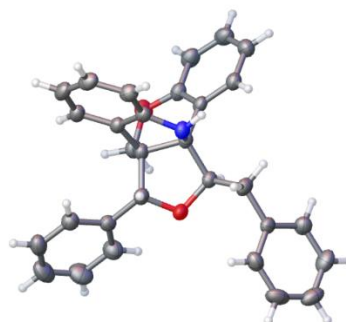

### Crystal data and structure refinement details for compound 3y

#### Crystallographic data and structure refinement parameters for compound 3y

|                                                     |                                                 |
|-----------------------------------------------------|-------------------------------------------------|
| Empirical formula                                   | C <sub>30</sub> H <sub>25</sub> NO <sub>2</sub> |
| Formula weight ( <i>M</i> )                         | 37.53                                           |
| Crystal system                                      | Triclinic                                       |
| Space group                                         | P-1                                             |
| <i>a</i> (Å)                                        | 9.206(3)                                        |
| <i>b</i> (Å)                                        | 10.088 (3)                                      |
| <i>c</i> (Å)                                        | 13.161 (4)                                      |
| $\alpha$ (°)                                        | 99.033 (4)                                      |
| $\beta$ (°)                                         | 97.884(4)                                       |
| $\gamma$ (°)                                        | 107.657(4)                                      |
| <i>V</i> ( Å <sup>3</sup> )                         | 1127.8(5)                                       |
| <i>Z</i>                                            | 23                                              |
| <i>D<sub>c</sub></i> ( Mg cm <sup>-3</sup> )        | 1.271                                           |
| <i>F</i> (000)                                      | 456.2                                           |
| $2\theta$ range for data collection (°)             | 3.2–53.56                                       |
| Reflections collected / unique                      | 4768/298                                        |
|                                                     | [ <i>R</i> (int) = 0.0310]                      |
| Goodness-of-fit on <i>F</i> <sup>2</sup>            | 1.044                                           |
| Final <i>R</i> indices [ <i>I</i> > 2σ( <i>I</i> )] | <i>R</i> <sub>1</sub> = 0.0417                  |
|                                                     | $\omega R_2 = 0.1158$                           |

*R* indices (all data)

$R_1=0.0538$

$\omega R_2 = 0.1270$

---

**11. NMR spectra for compounds 3a-3y, 2a, 2aa, 2z, and D-3a**

7.278  
7.256  
7.242  
7.216  
7.198  
7.176  
7.136  
7.120  
7.103  
7.084  
7.049  
7.030  
7.010  
6.992  
6.970  
6.950  
6.794  
6.776  
6.757  
6.701  
6.682

4.328  
4.299  
4.229  
4.207  
4.065  
4.043  
3.919  
3.891  
3.832  
3.816  
3.800  
3.131  
3.115

-0.000

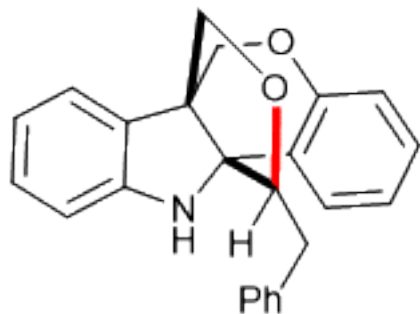

**3a**

400 MHz, CDCl<sub>3</sub>

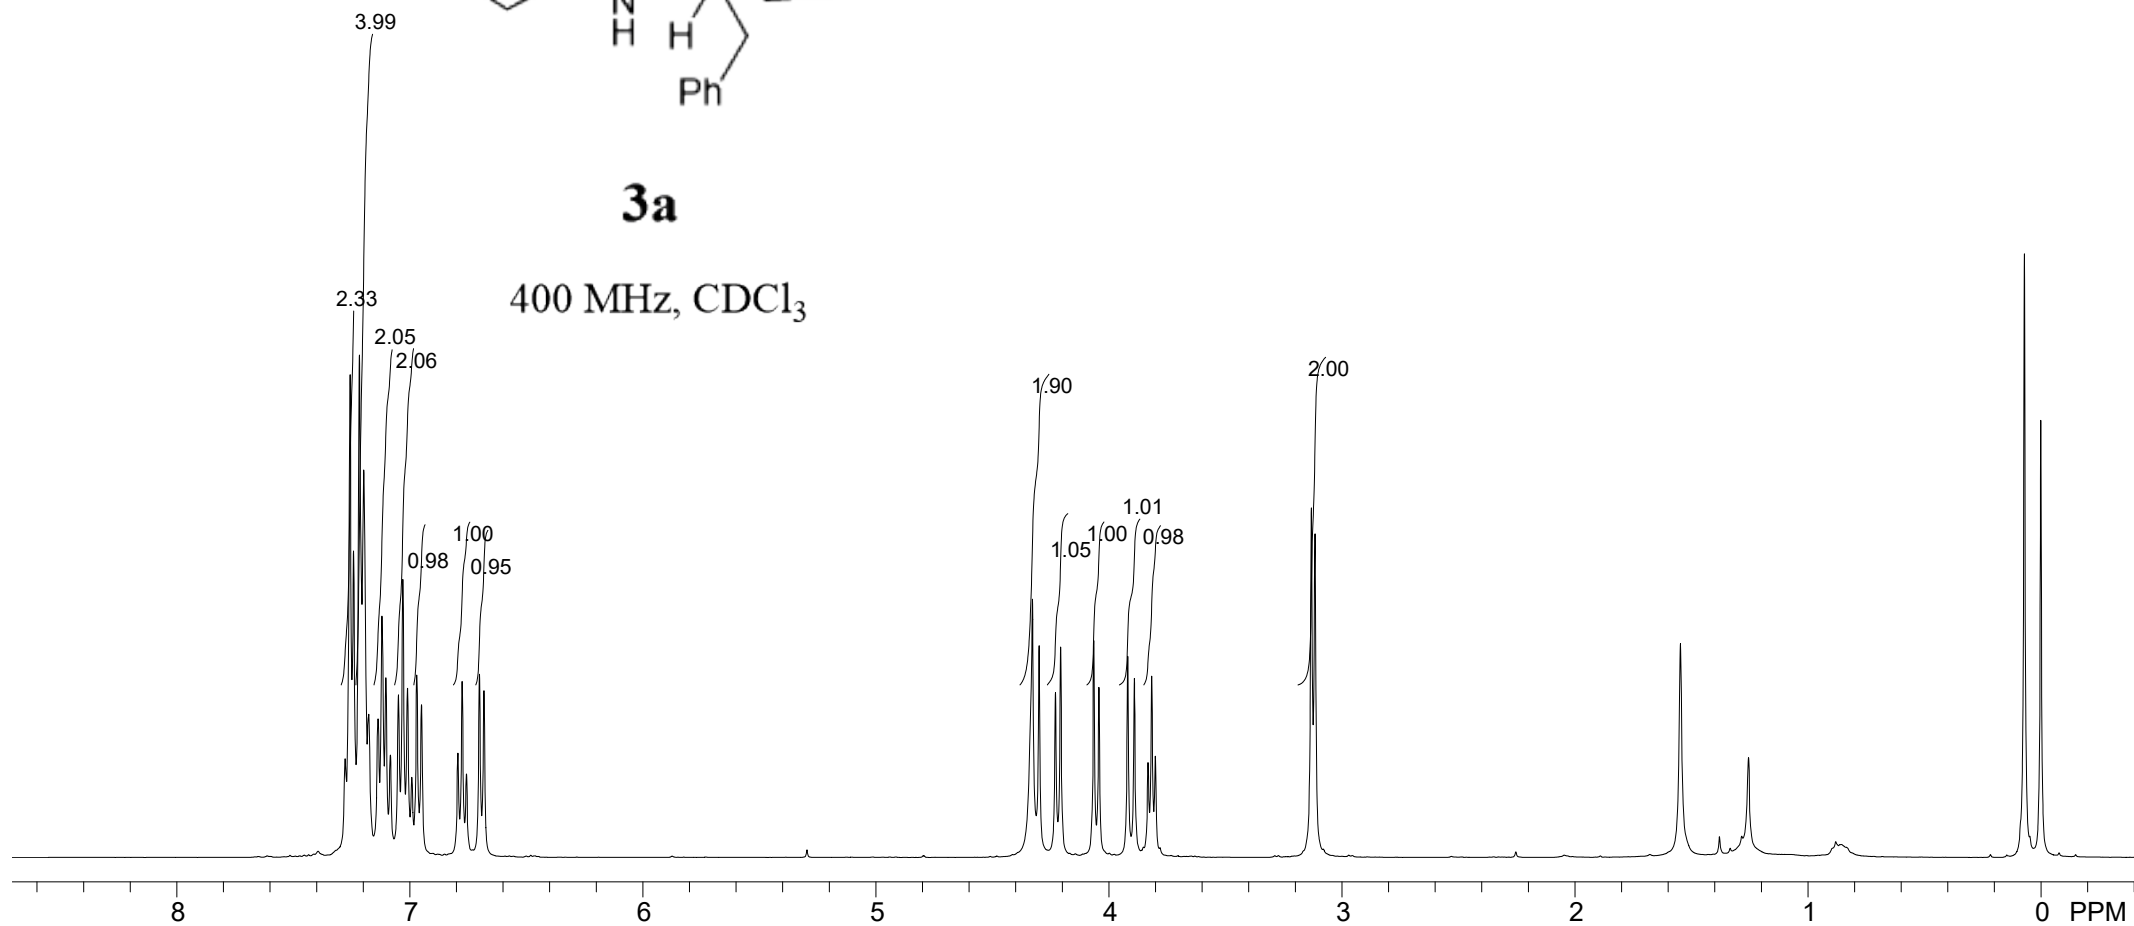

153.539  
149.937  
138.664  
130.644  
129.105  
128.923  
128.391  
128.099  
126.349  
125.707  
122.864  
122.689  
119.517  
118.066  
109.724

90.927

77.321  
77.000  
76.687  
75.279  
72.020  
69.300

60.106

36.044

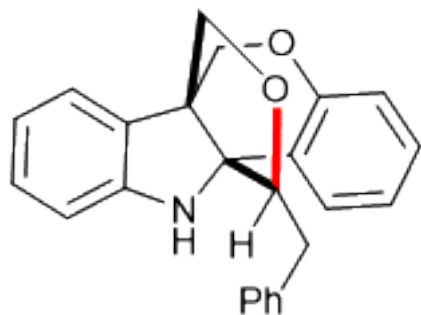

**3a**

100 MHz, CDCl<sub>3</sub>

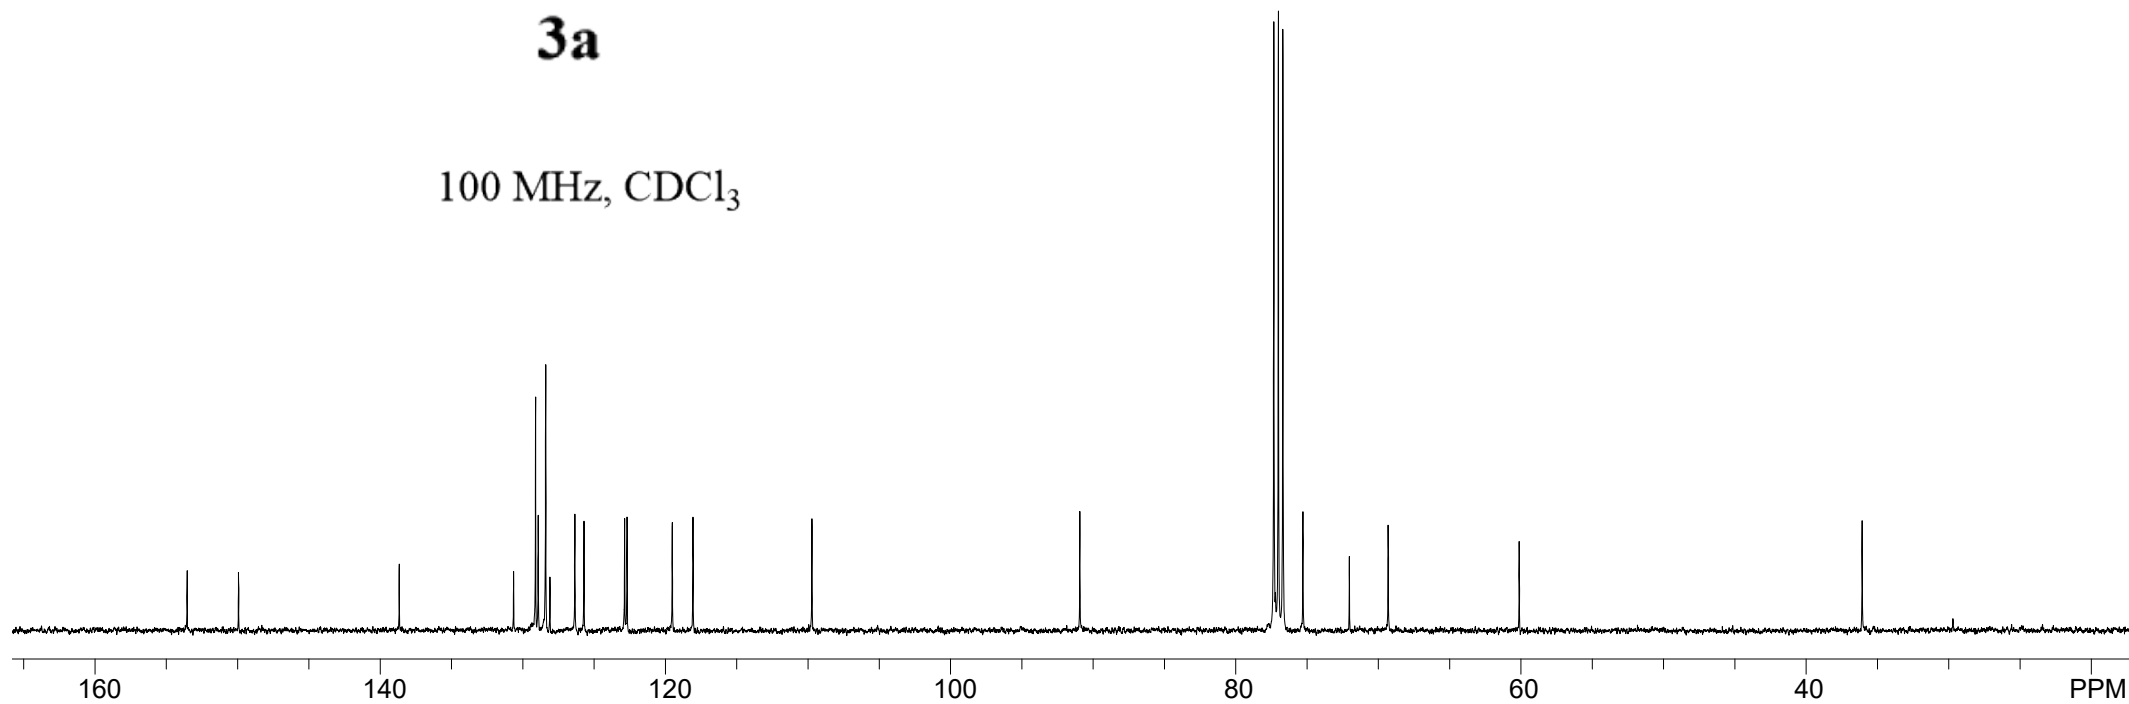

7.215  
7.197  
7.177  
7.146  
7.133  
7.114  
7.100  
7.080  
7.045  
7.028  
7.018  
6.998  
6.969  
6.949  
6.812  
6.790  
6.771  
6.753  
6.694  
6.674

4.324  
4.296  
4.221  
4.199  
4.059  
4.037  
3.919  
3.891  
3.806  
3.788  
3.764  
3.072  
3.056

-0.000

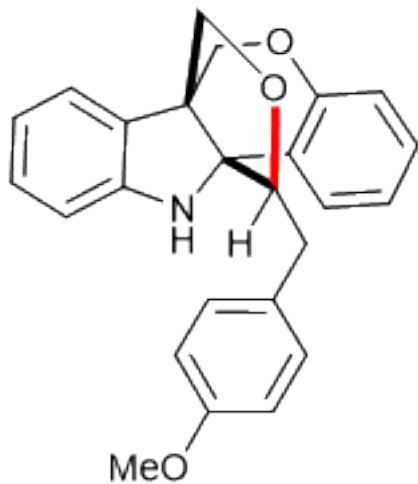

**3b**

400 MHz, CDCl<sub>3</sub>

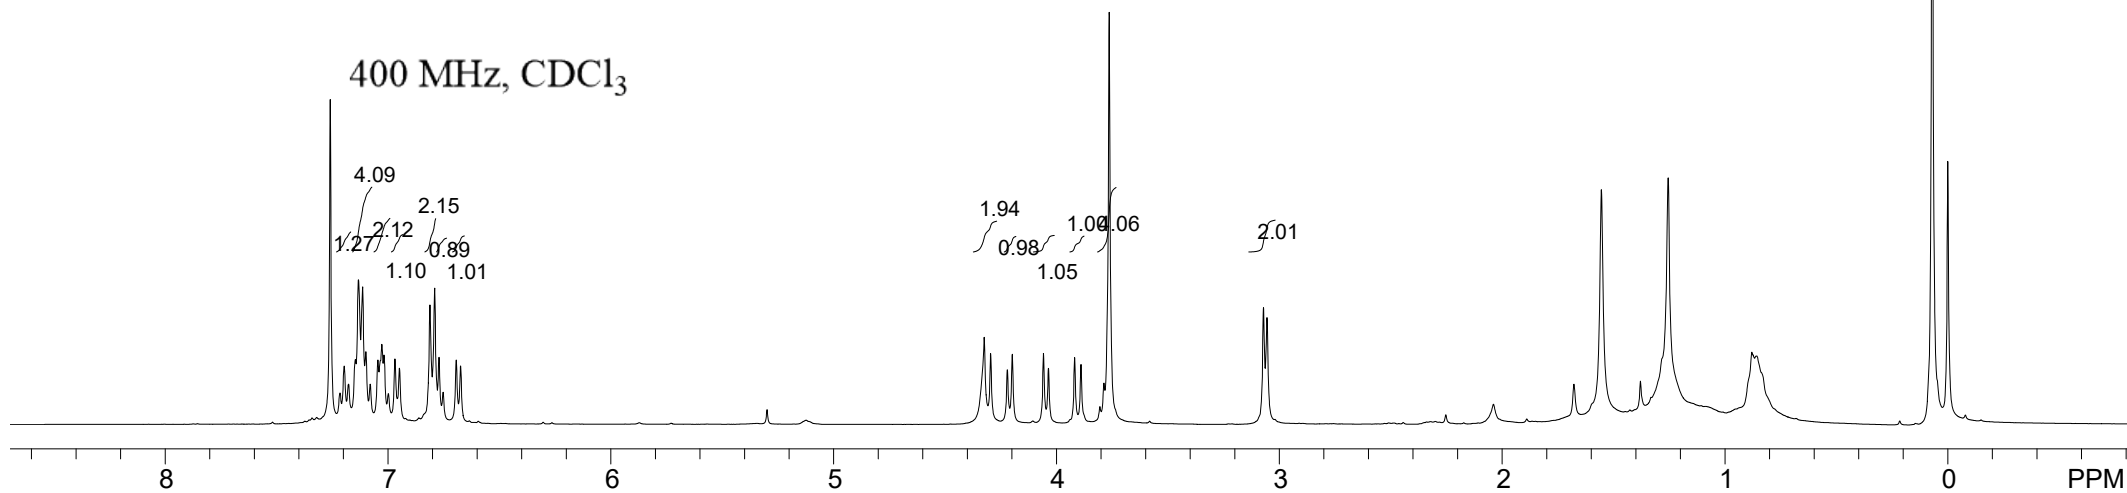

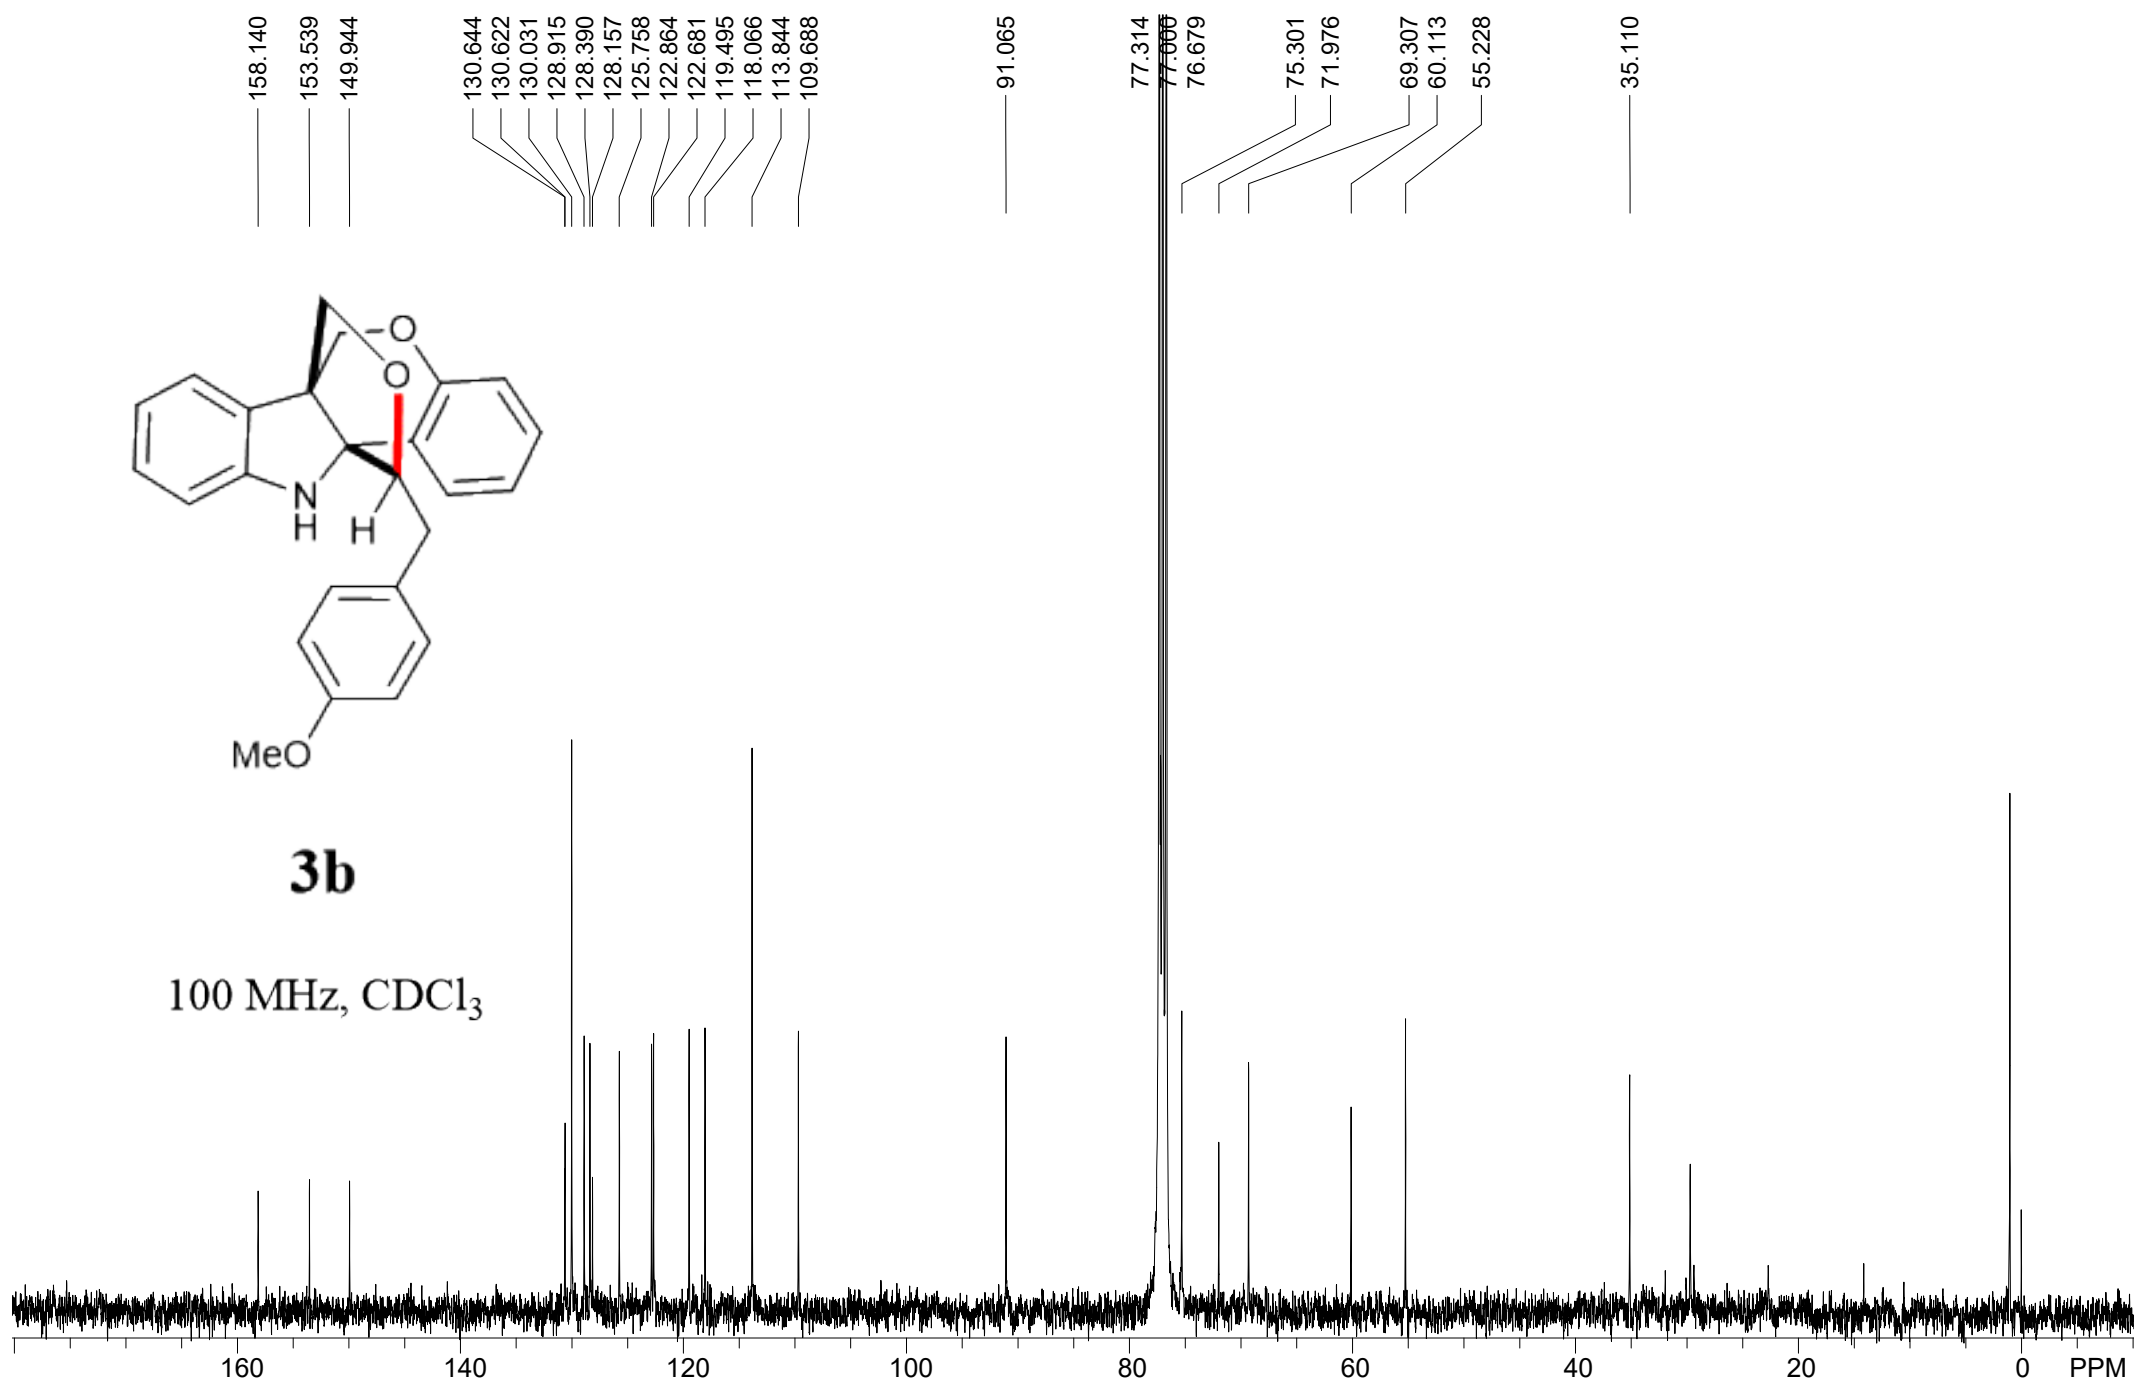

7.212  
7.193  
7.174  
7.151  
7.133  
7.105  
7.085  
7.072  
7.051  
7.039  
7.031  
7.020  
7.012  
6.993  
6.966  
6.946  
6.784  
6.765  
6.747  
6.688  
6.669

4.337  
4.317  
4.288  
4.212  
4.190  
4.047  
4.025  
3.915  
3.886  
3.801  
3.785  
3.769  
3.084  
3.069

2.291

0.000

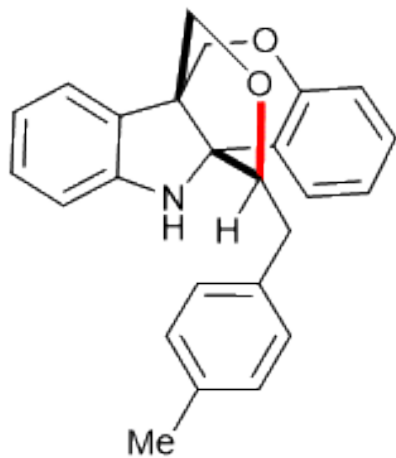

**3c**

400 MHz, CDCl<sub>3</sub>

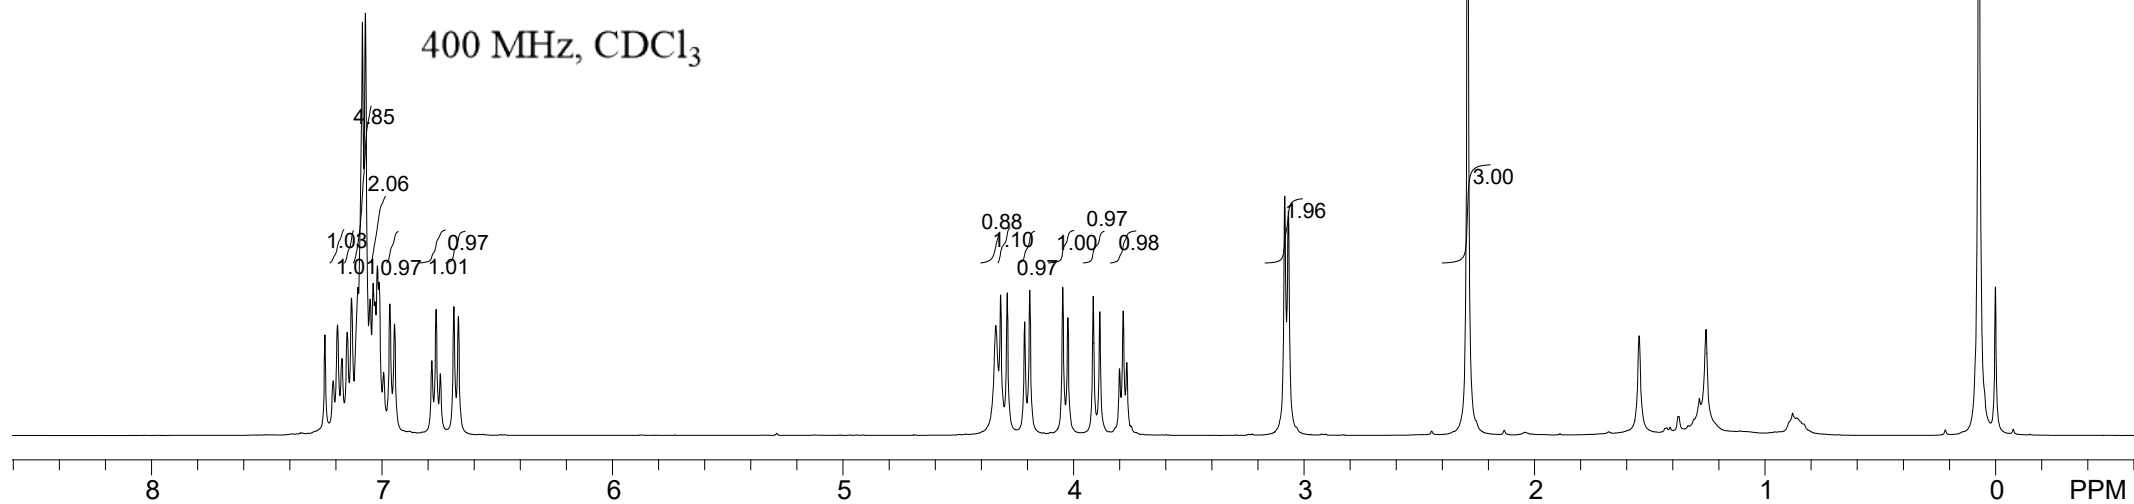

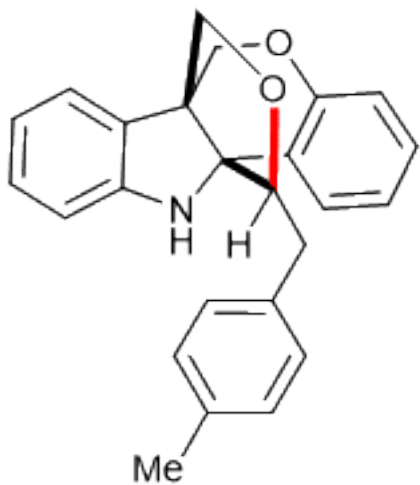

**3c**

100 MHz, CDCl<sub>3</sub>

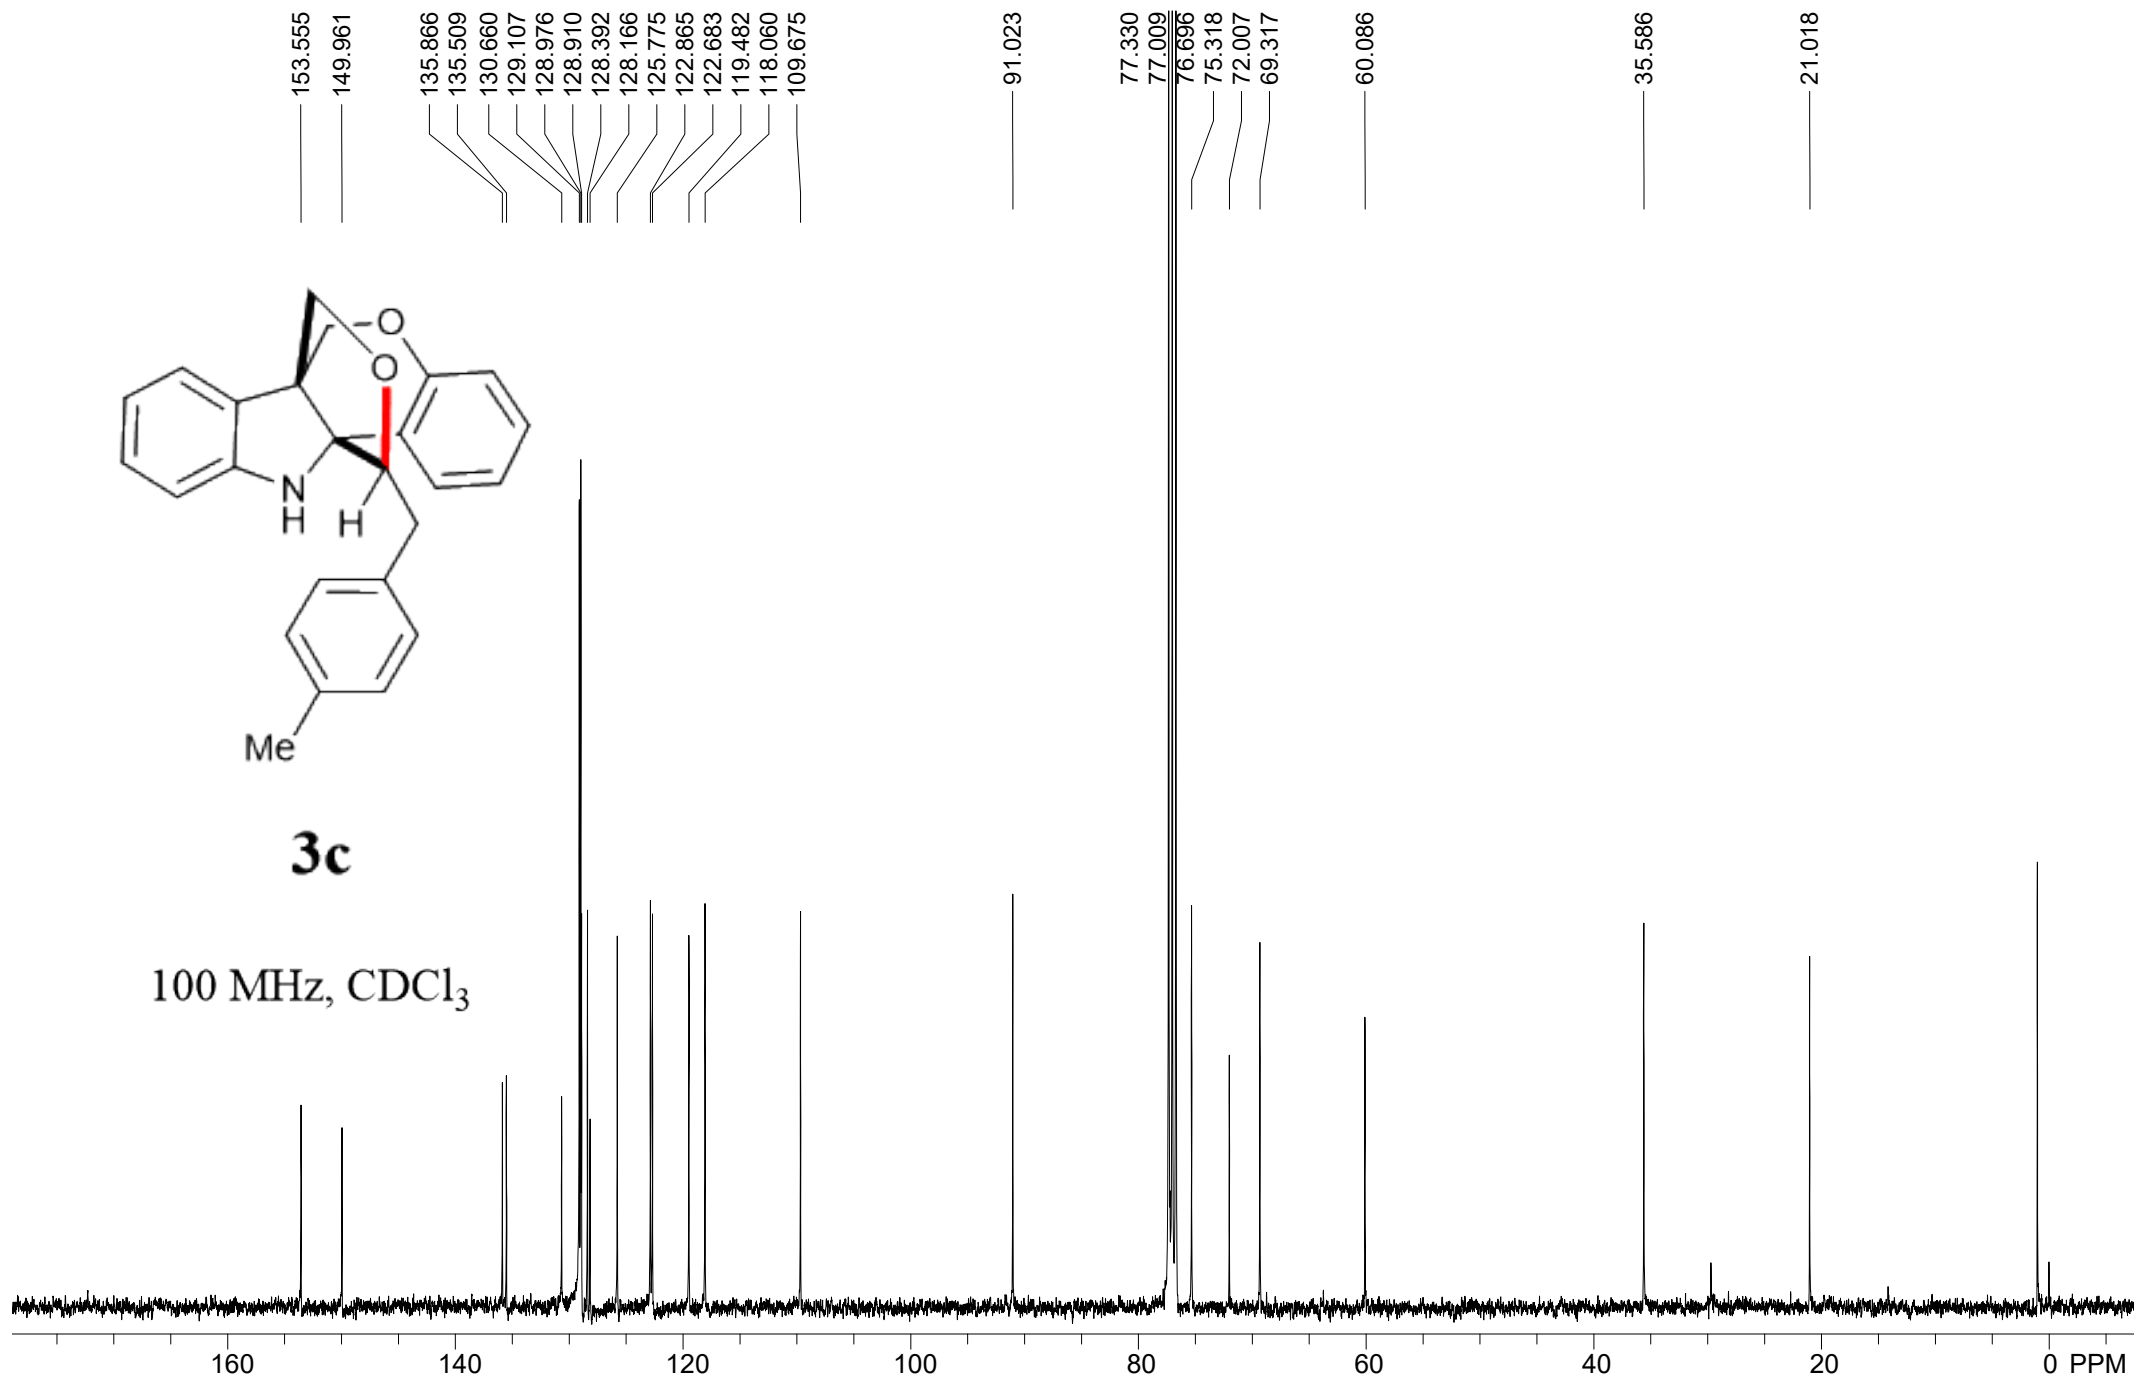



7.230  
7.209  
7.189  
7.159  
7.128  
7.108  
7.092  
7.073  
7.048  
7.031  
7.014  
6.974  
6.955  
6.790  
6.772  
6.754  
6.685  
6.666

4.314  
4.286  
4.212  
4.190  
4.042  
4.019  
3.894  
3.866  
3.741  
3.730  
3.721  
3.710  
3.084  
3.063

-0.000

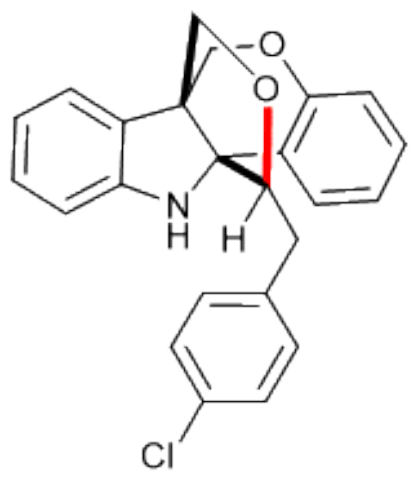

**3d**

400 MHz, CDCl<sub>3</sub>

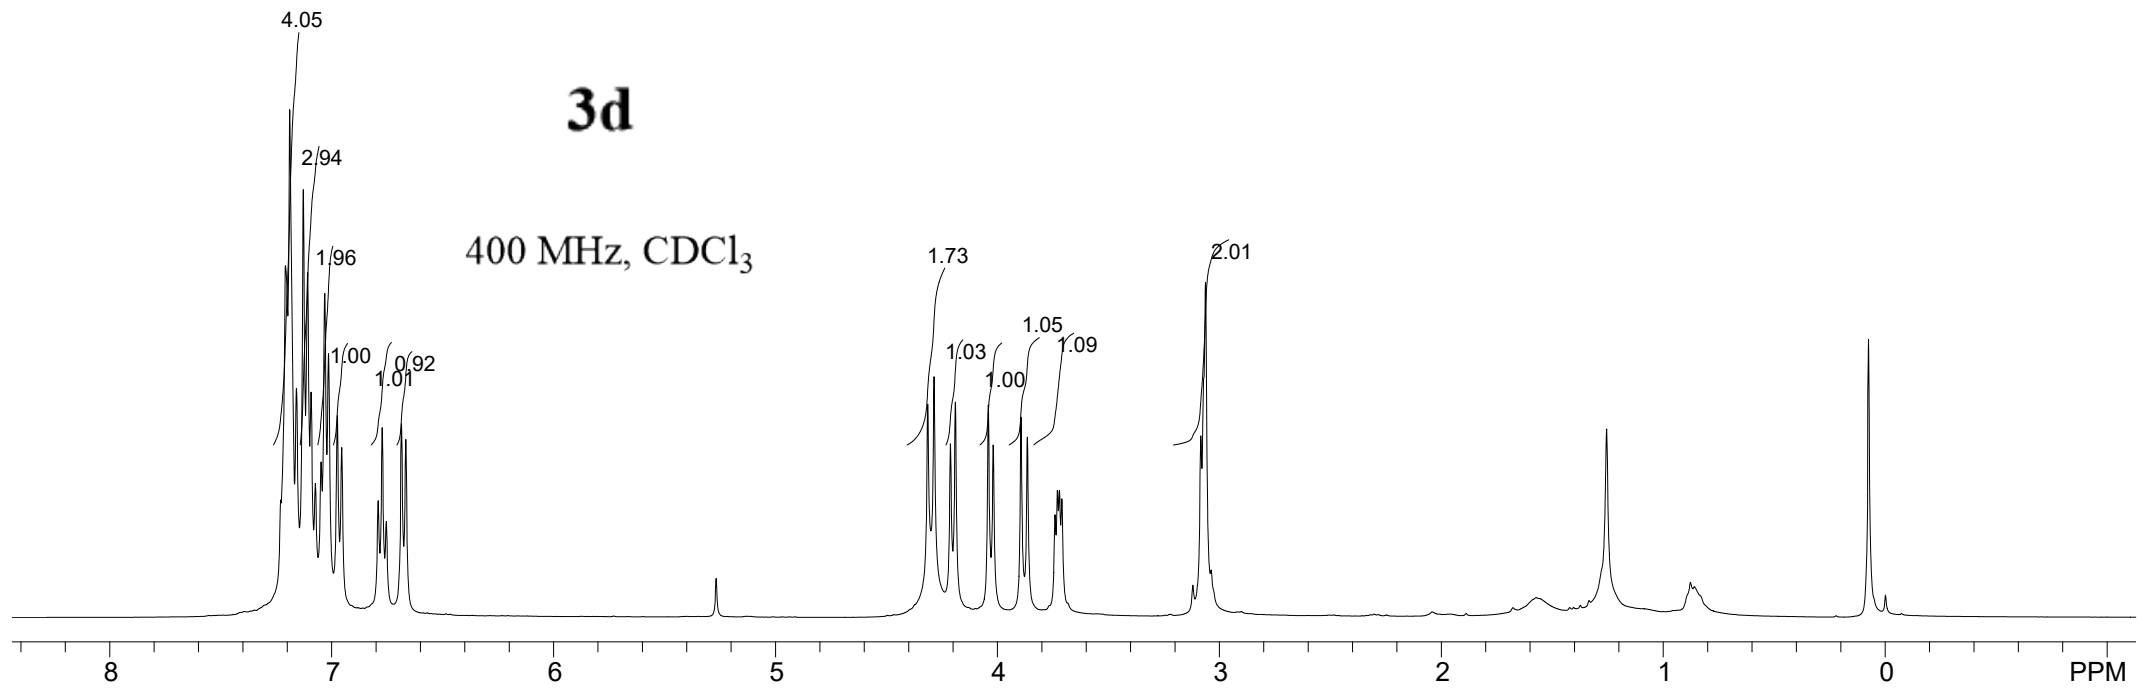

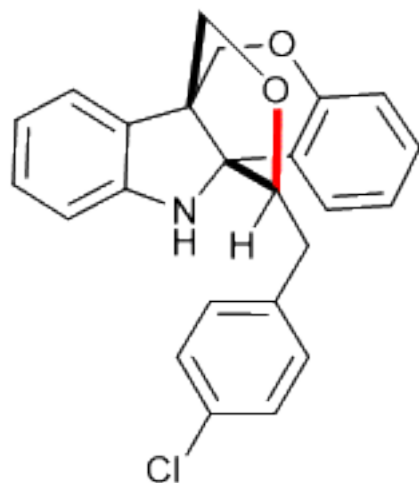

**3d**

100 MHz, CDCl<sub>3</sub>

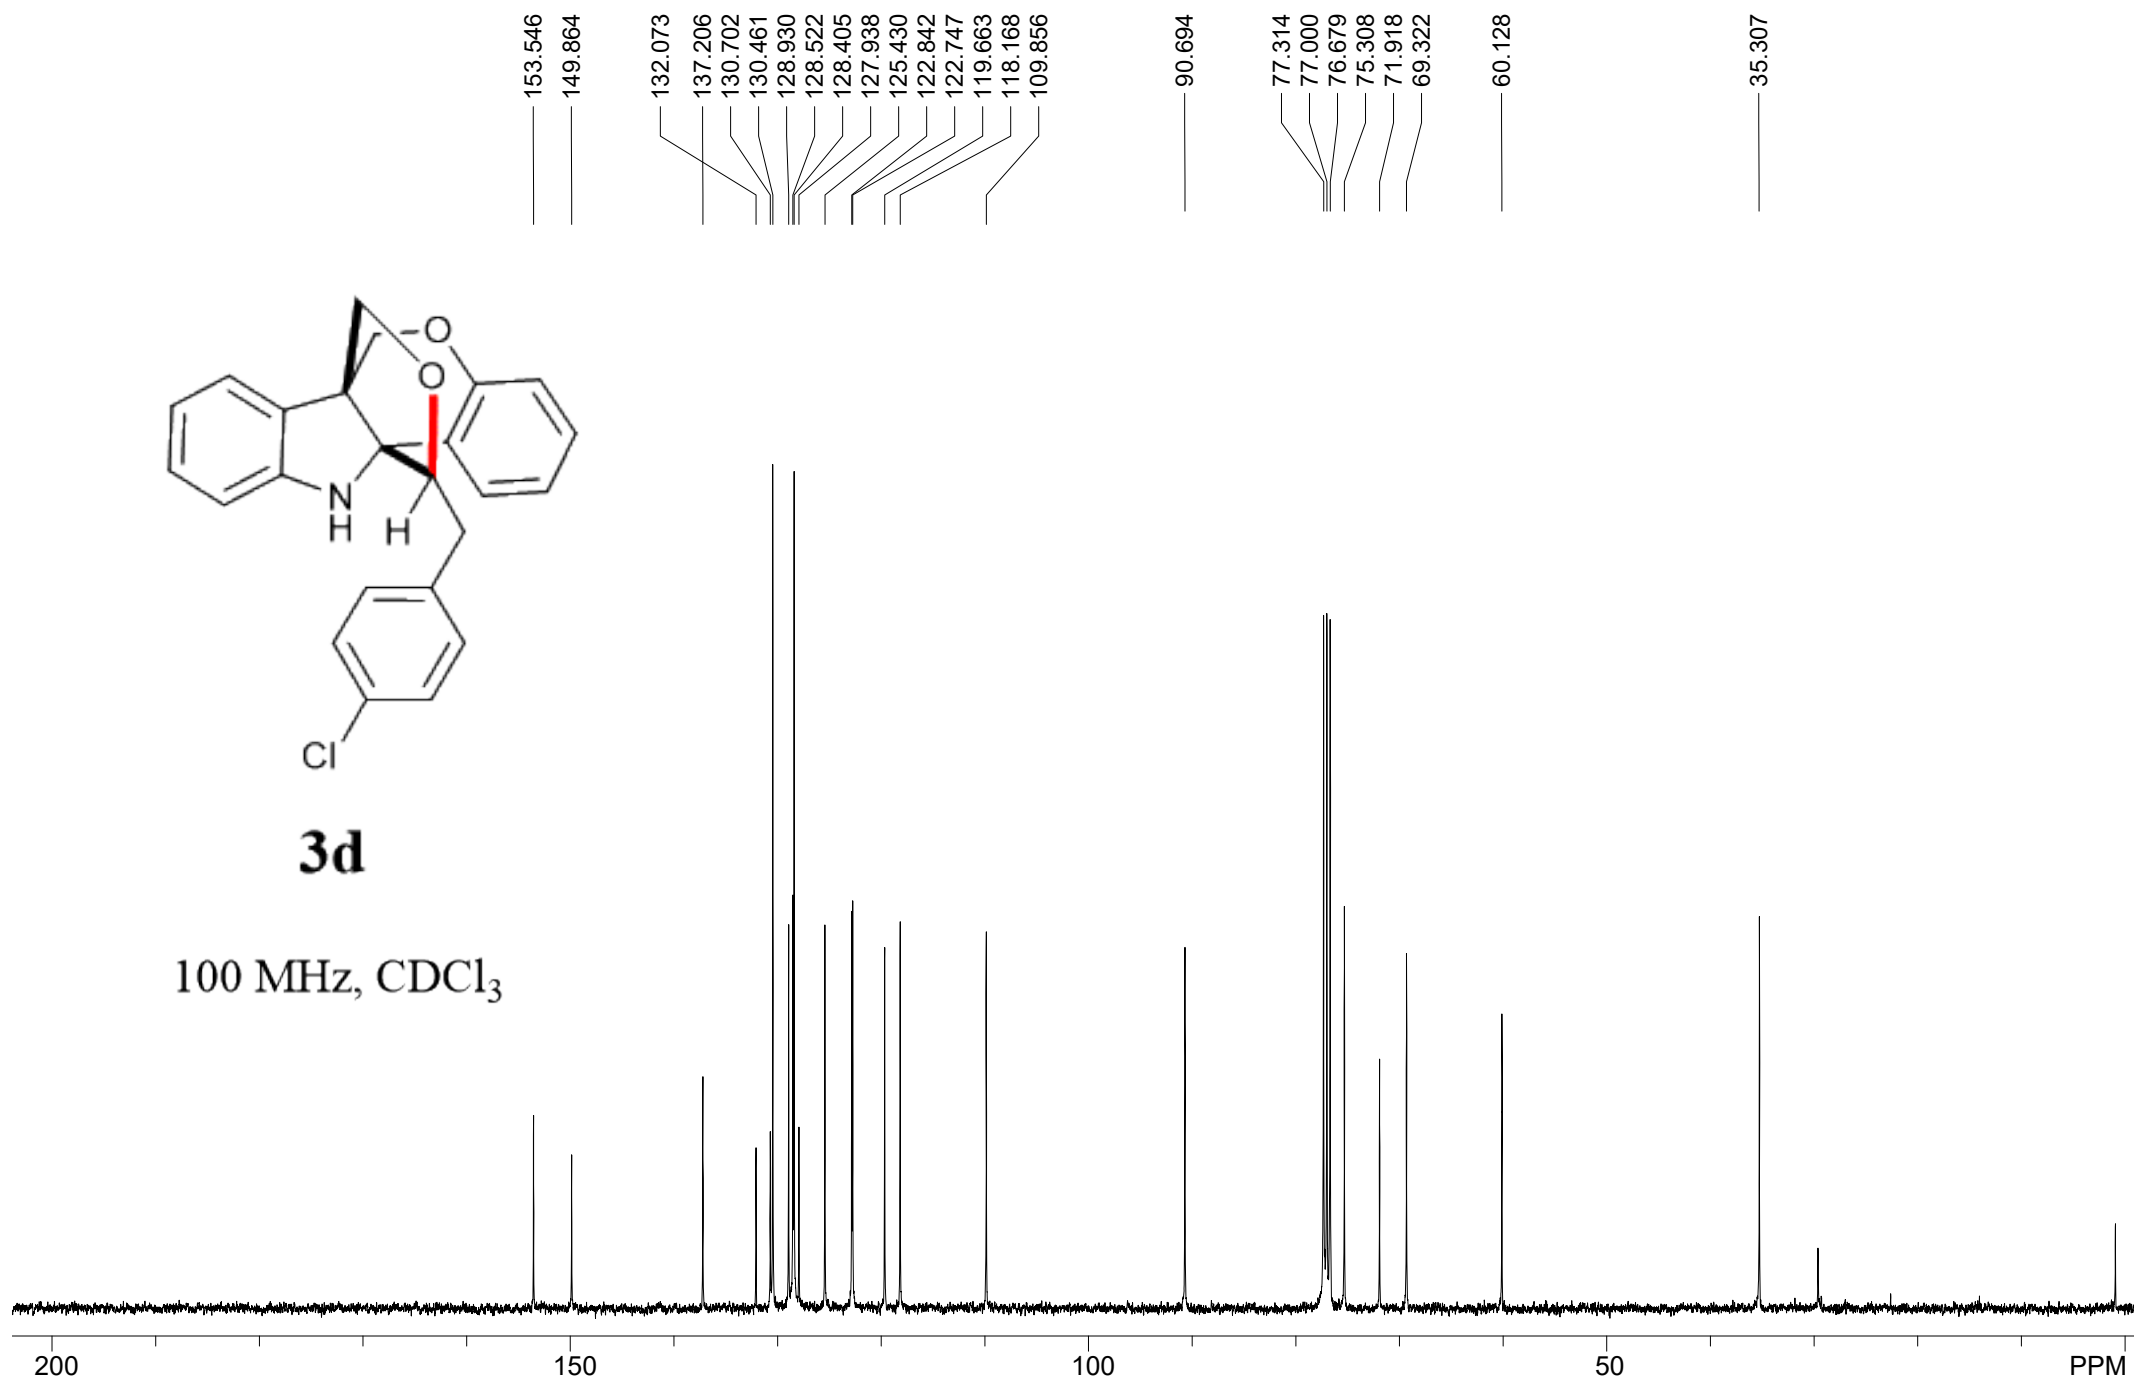

7.365  
7.345  
7.244  
7.229  
7.210  
7.188  
7.168  
7.117  
7.099  
7.080  
7.059  
7.039  
7.021  
6.980  
6.960  
6.797  
6.779  
6.761  
6.693  
6.674

4.323  
4.293  
4.217  
4.194  
4.045  
4.023  
3.902  
3.873  
3.738  
3.728  
3.718  
3.707  
3.075  
3.054

-0.000

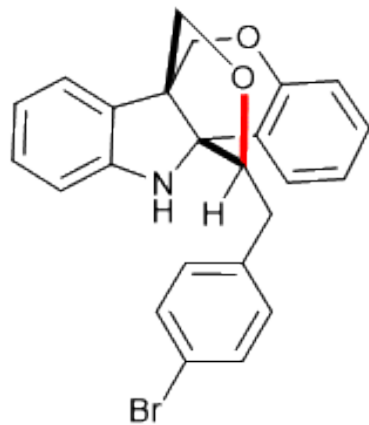

**3e**

400 MHz, CDCl<sub>3</sub>

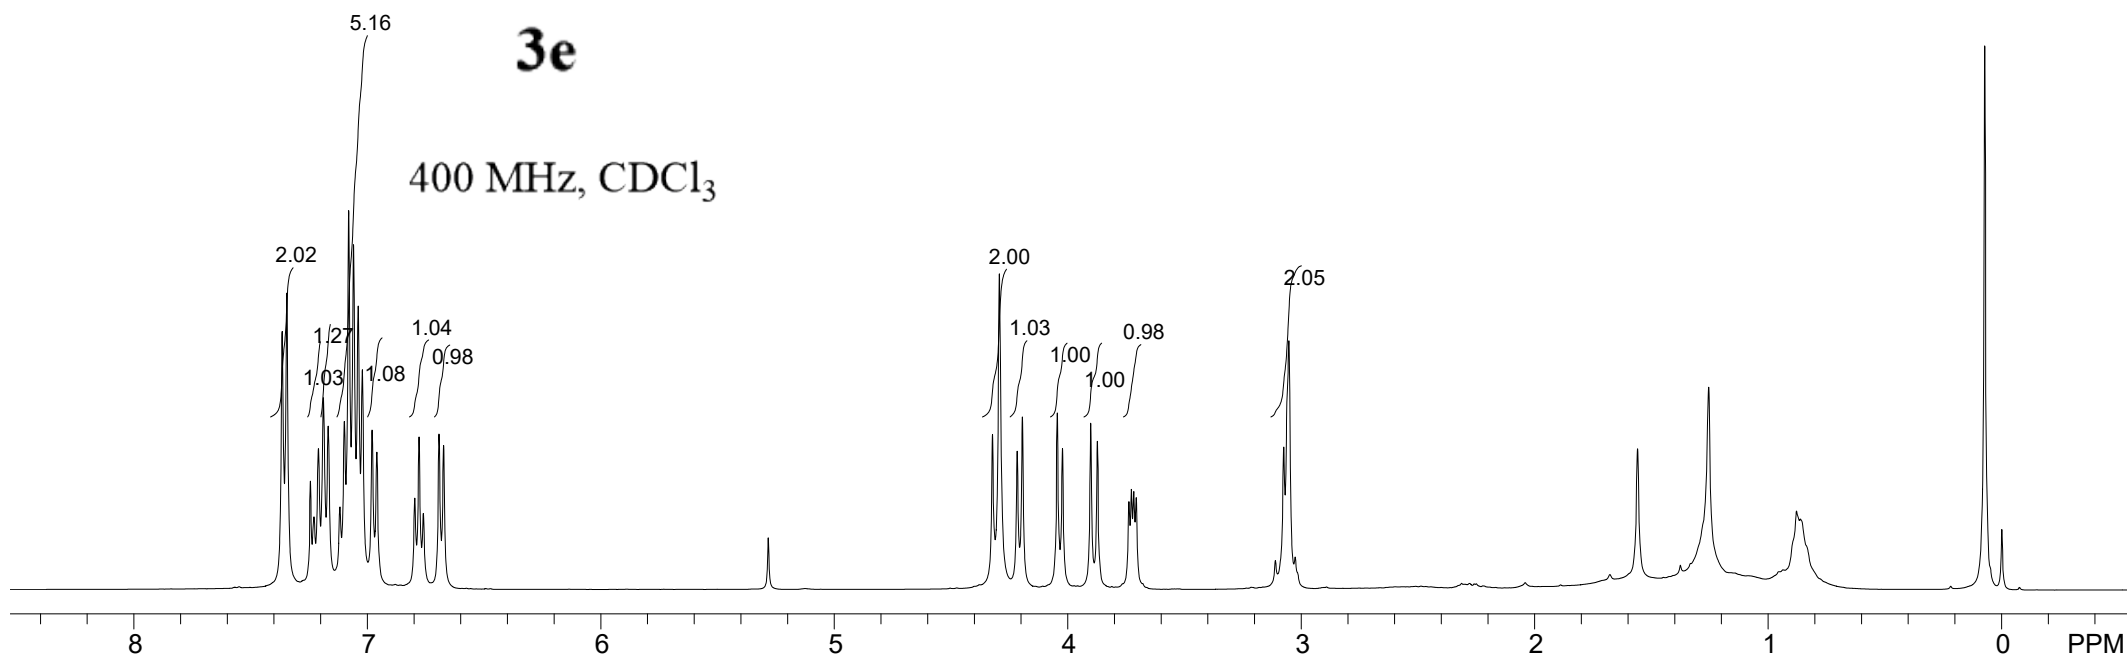

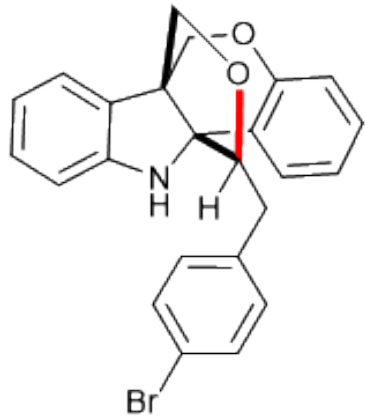

**3e**

100 MHz, CDCl<sub>3</sub>

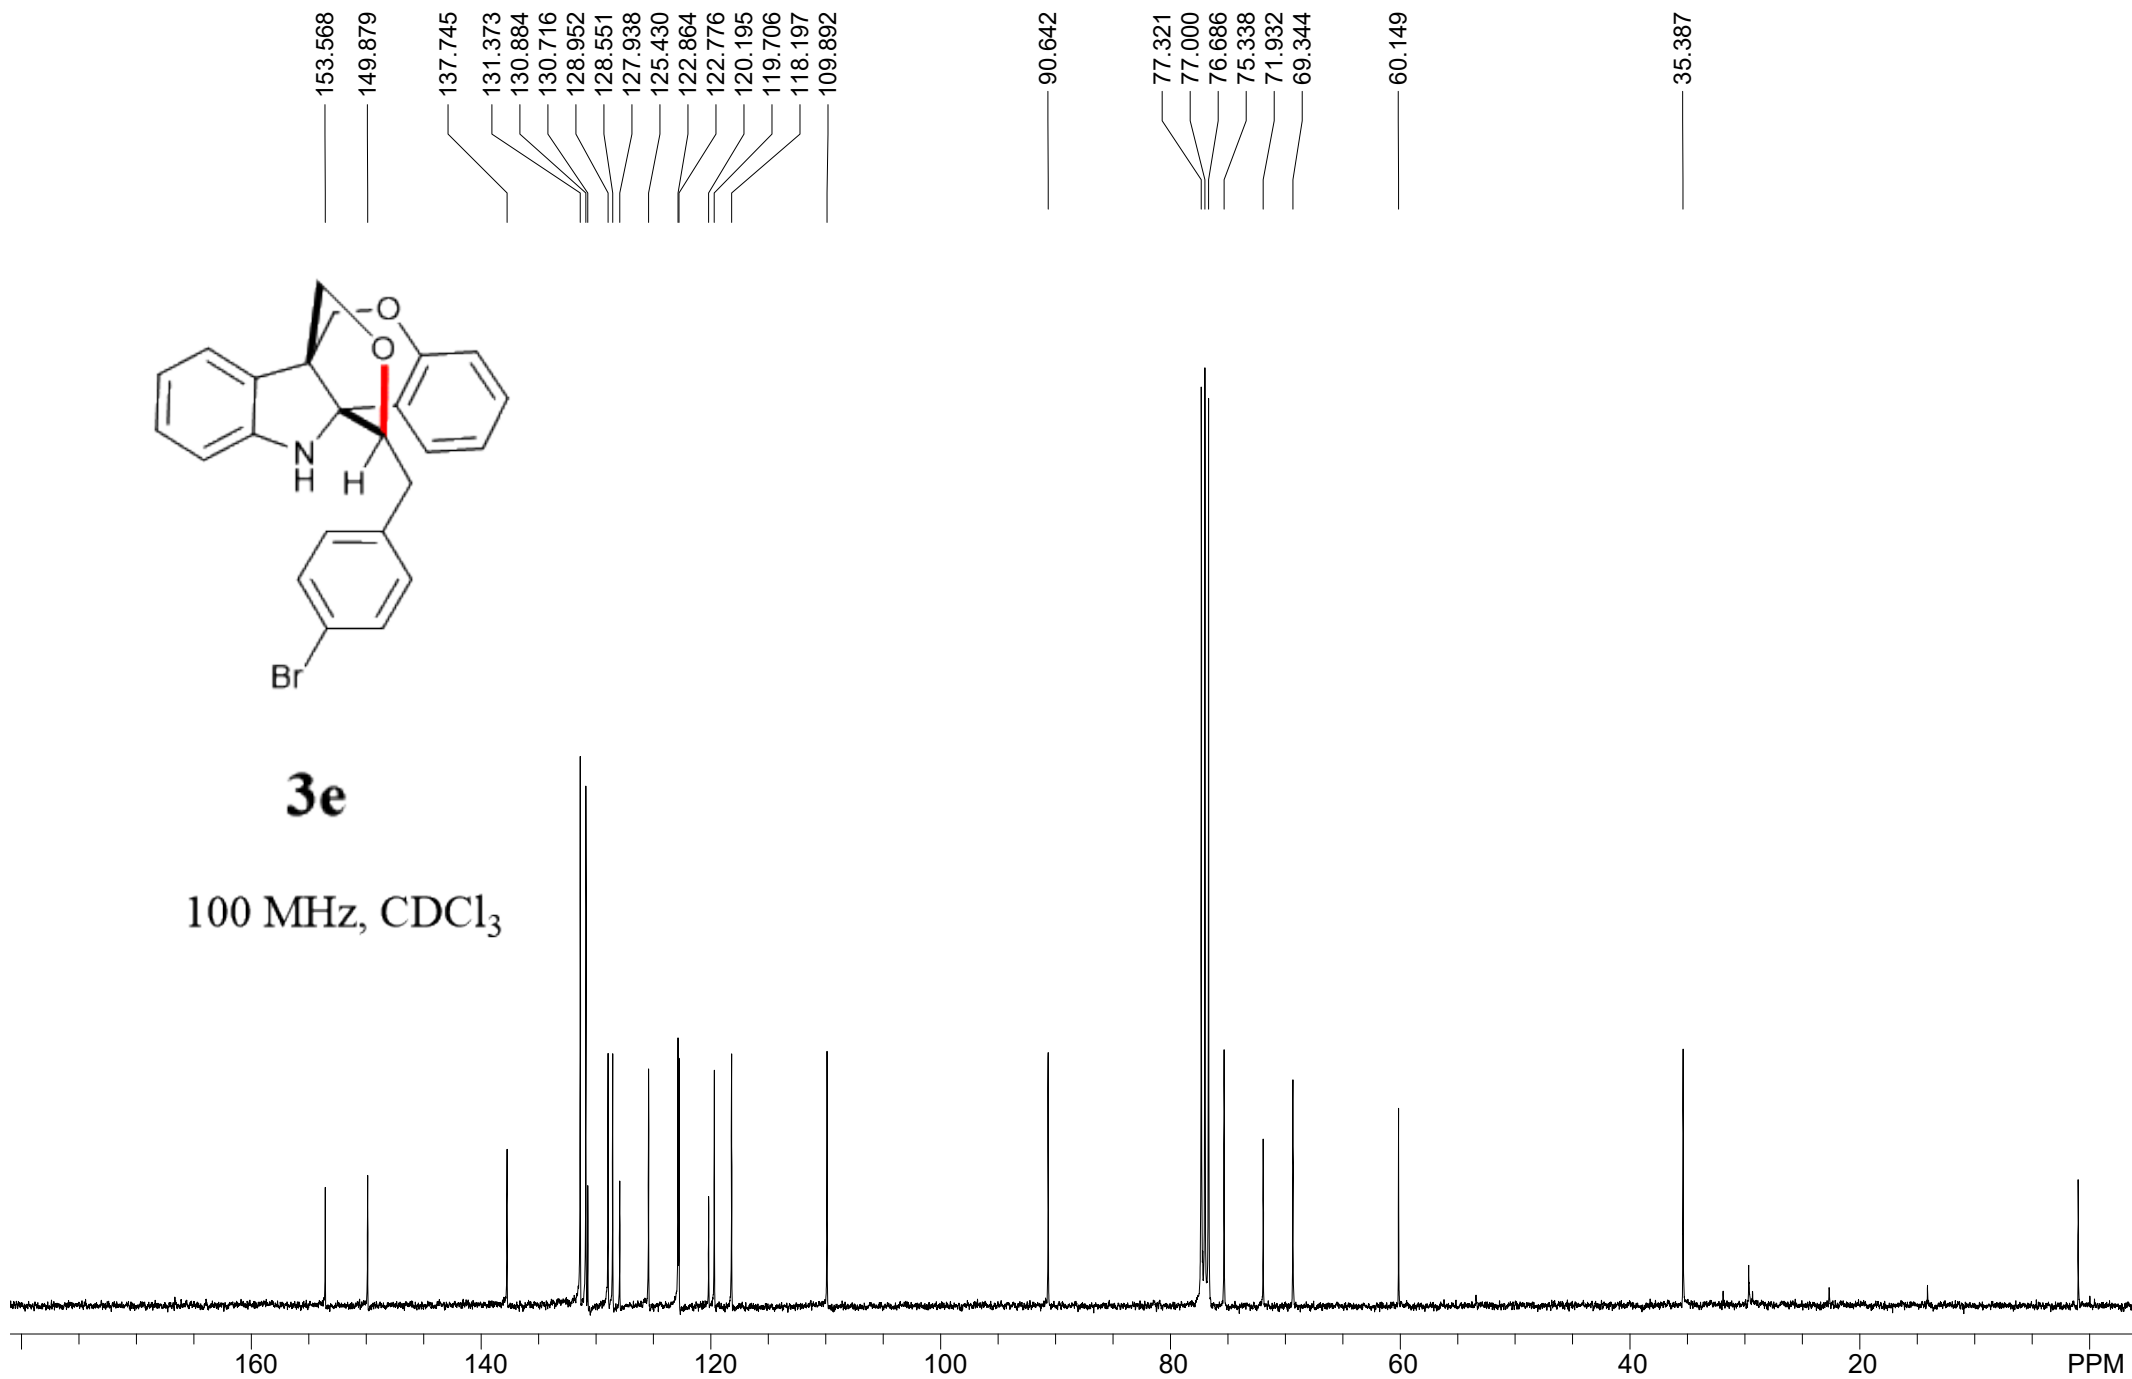

7.243  
7.223  
7.204  
7.183  
7.171  
7.154  
7.136  
7.119  
7.099  
7.080  
7.045  
7.028  
7.012  
6.977  
6.956  
6.949  
6.927  
6.906  
6.795  
6.777  
6.759  
6.695  
6.675  
4.325  
4.297  
4.222  
4.200  
4.055  
4.032  
3.906  
3.878  
3.756  
3.741  
3.725  
3.092  
3.077

0.000

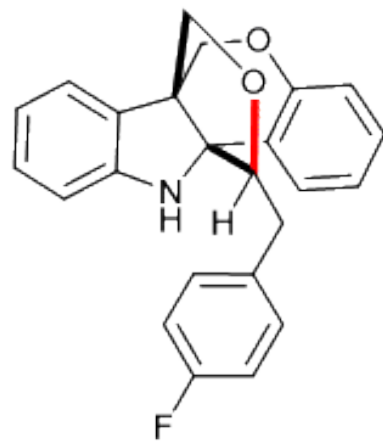

**3f**

400 MHz, CDCl<sub>3</sub>

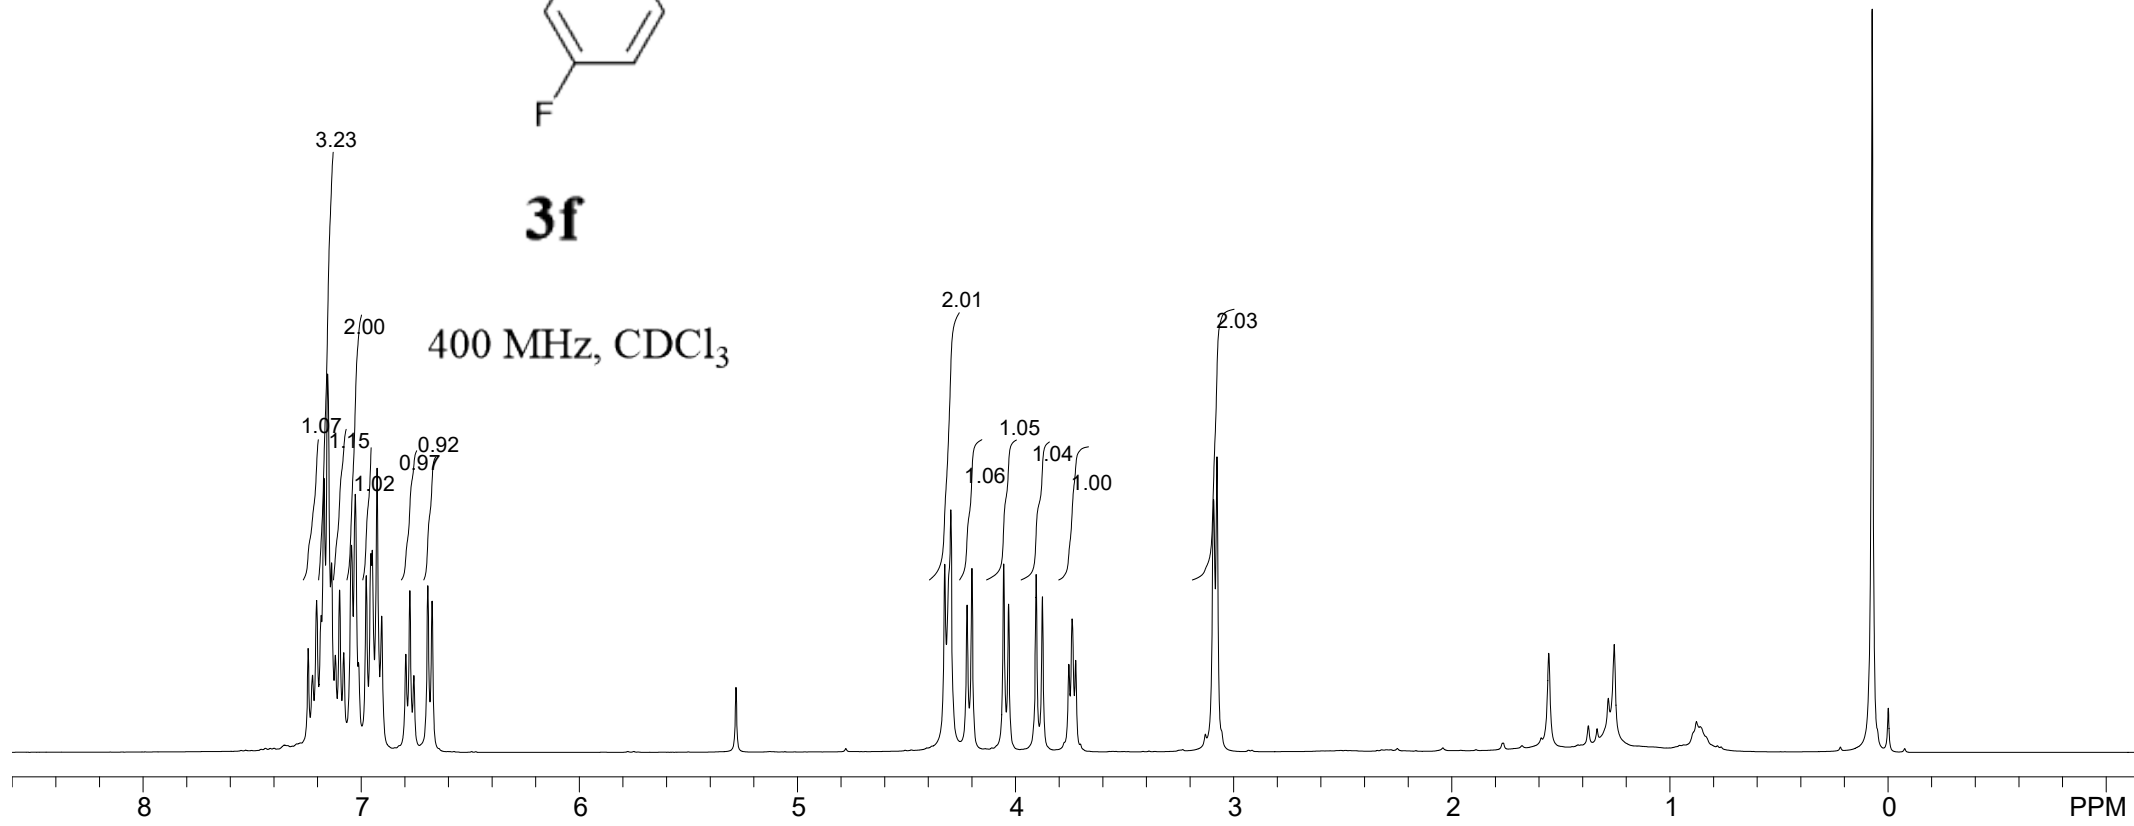

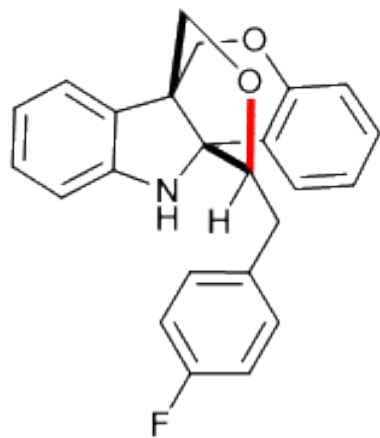

**3f**

100 MHz, CDCl<sub>3</sub>

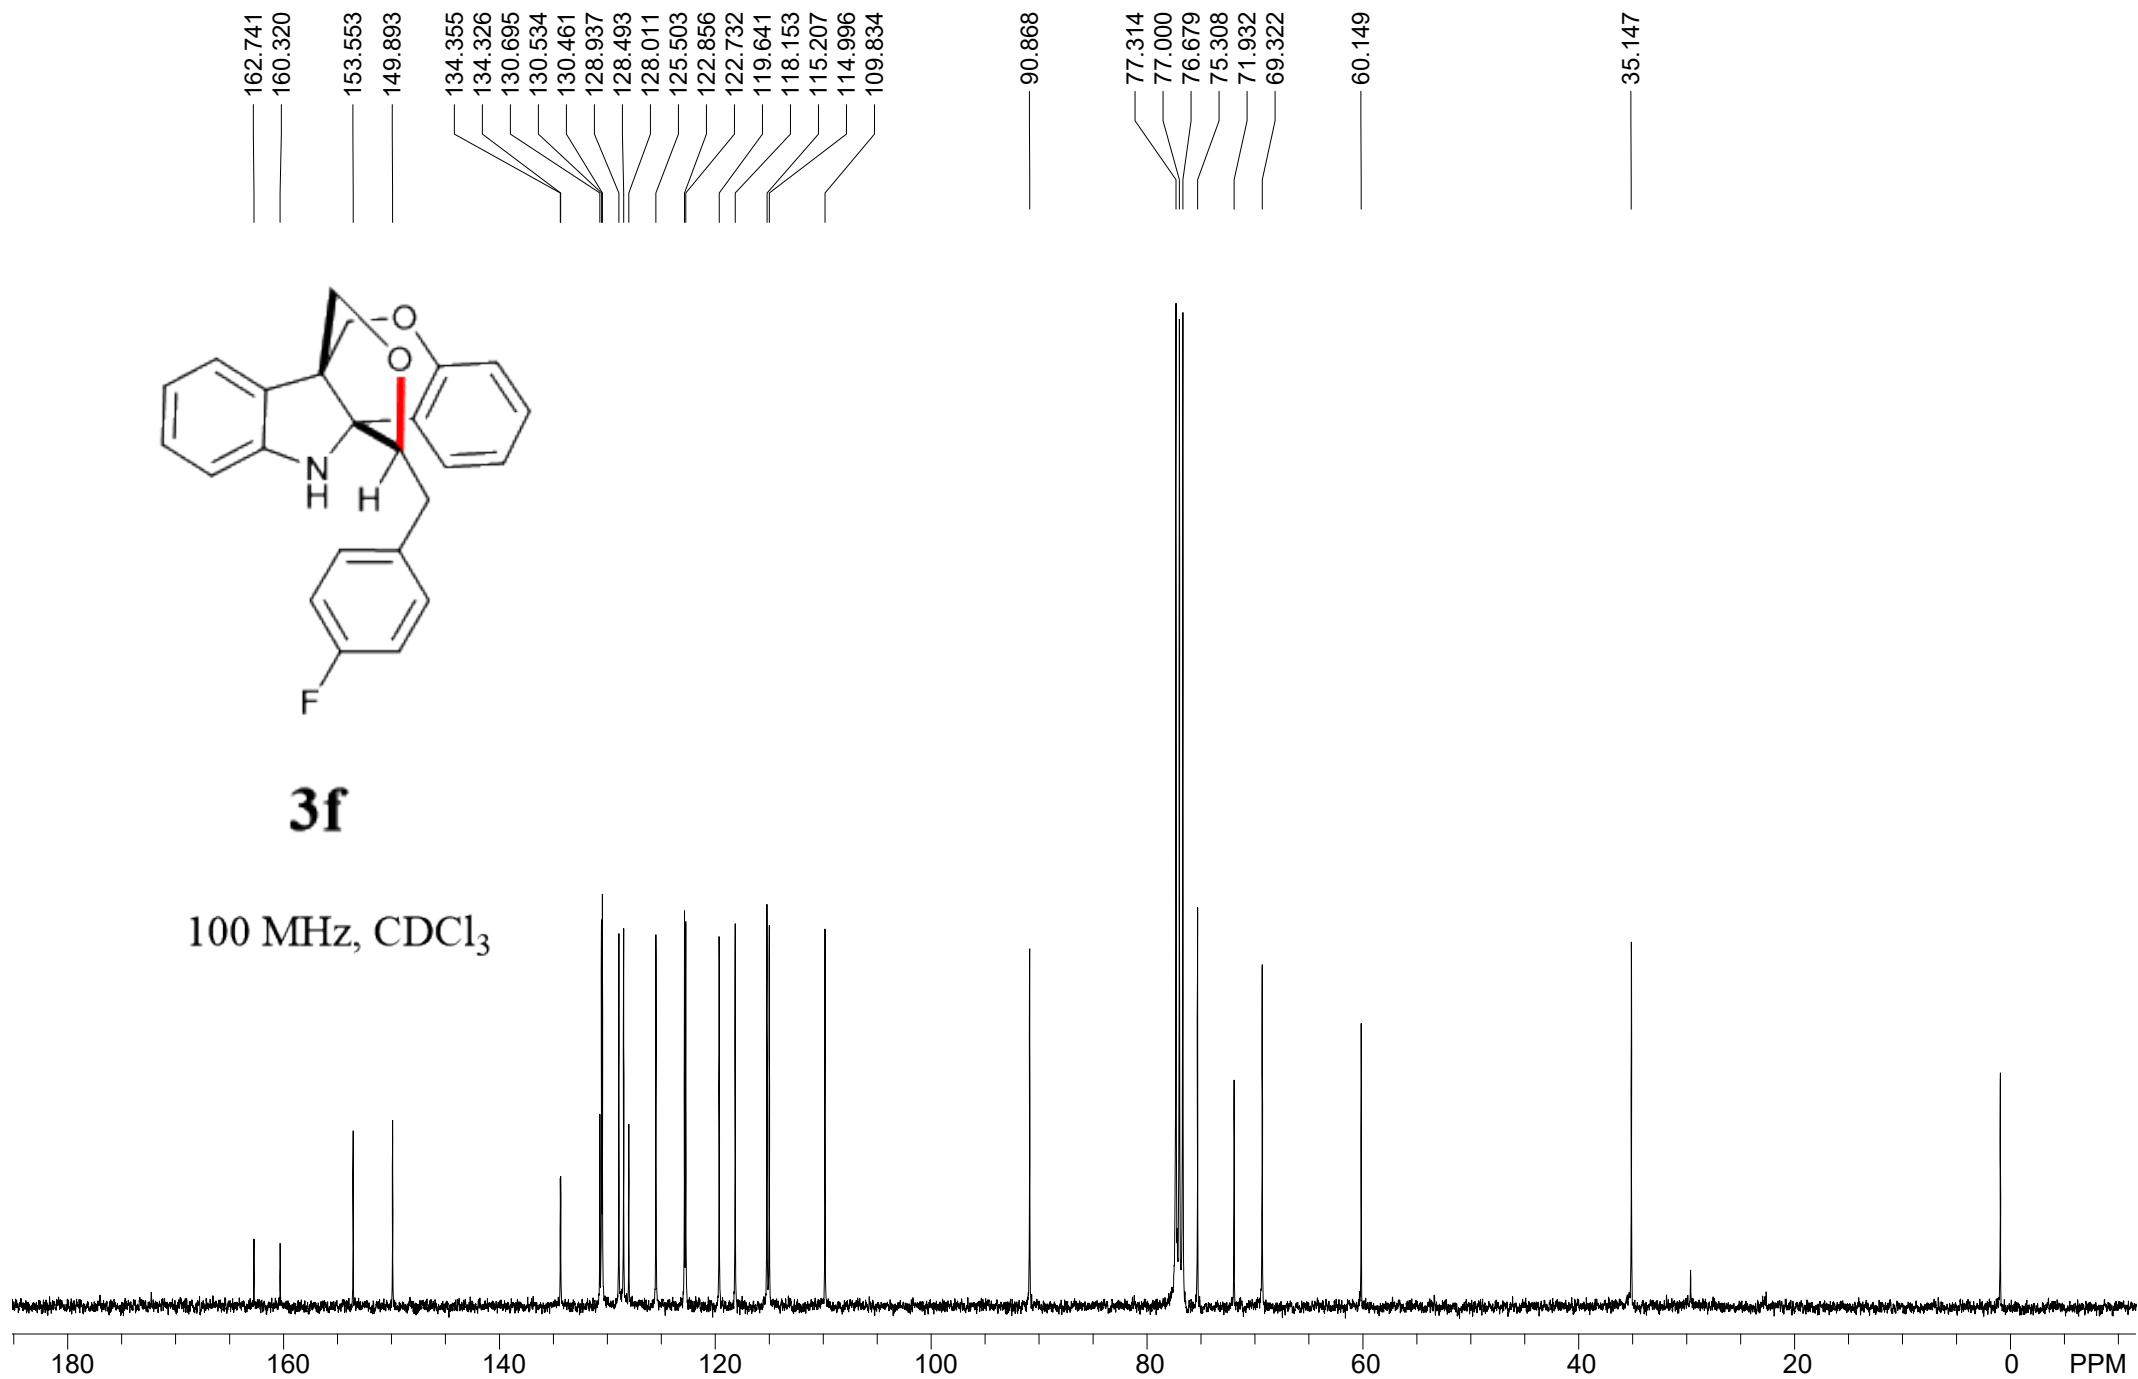

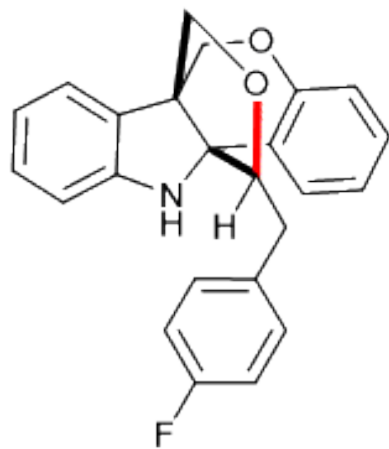

**3f**

376 MHz, CDCl<sub>3</sub>

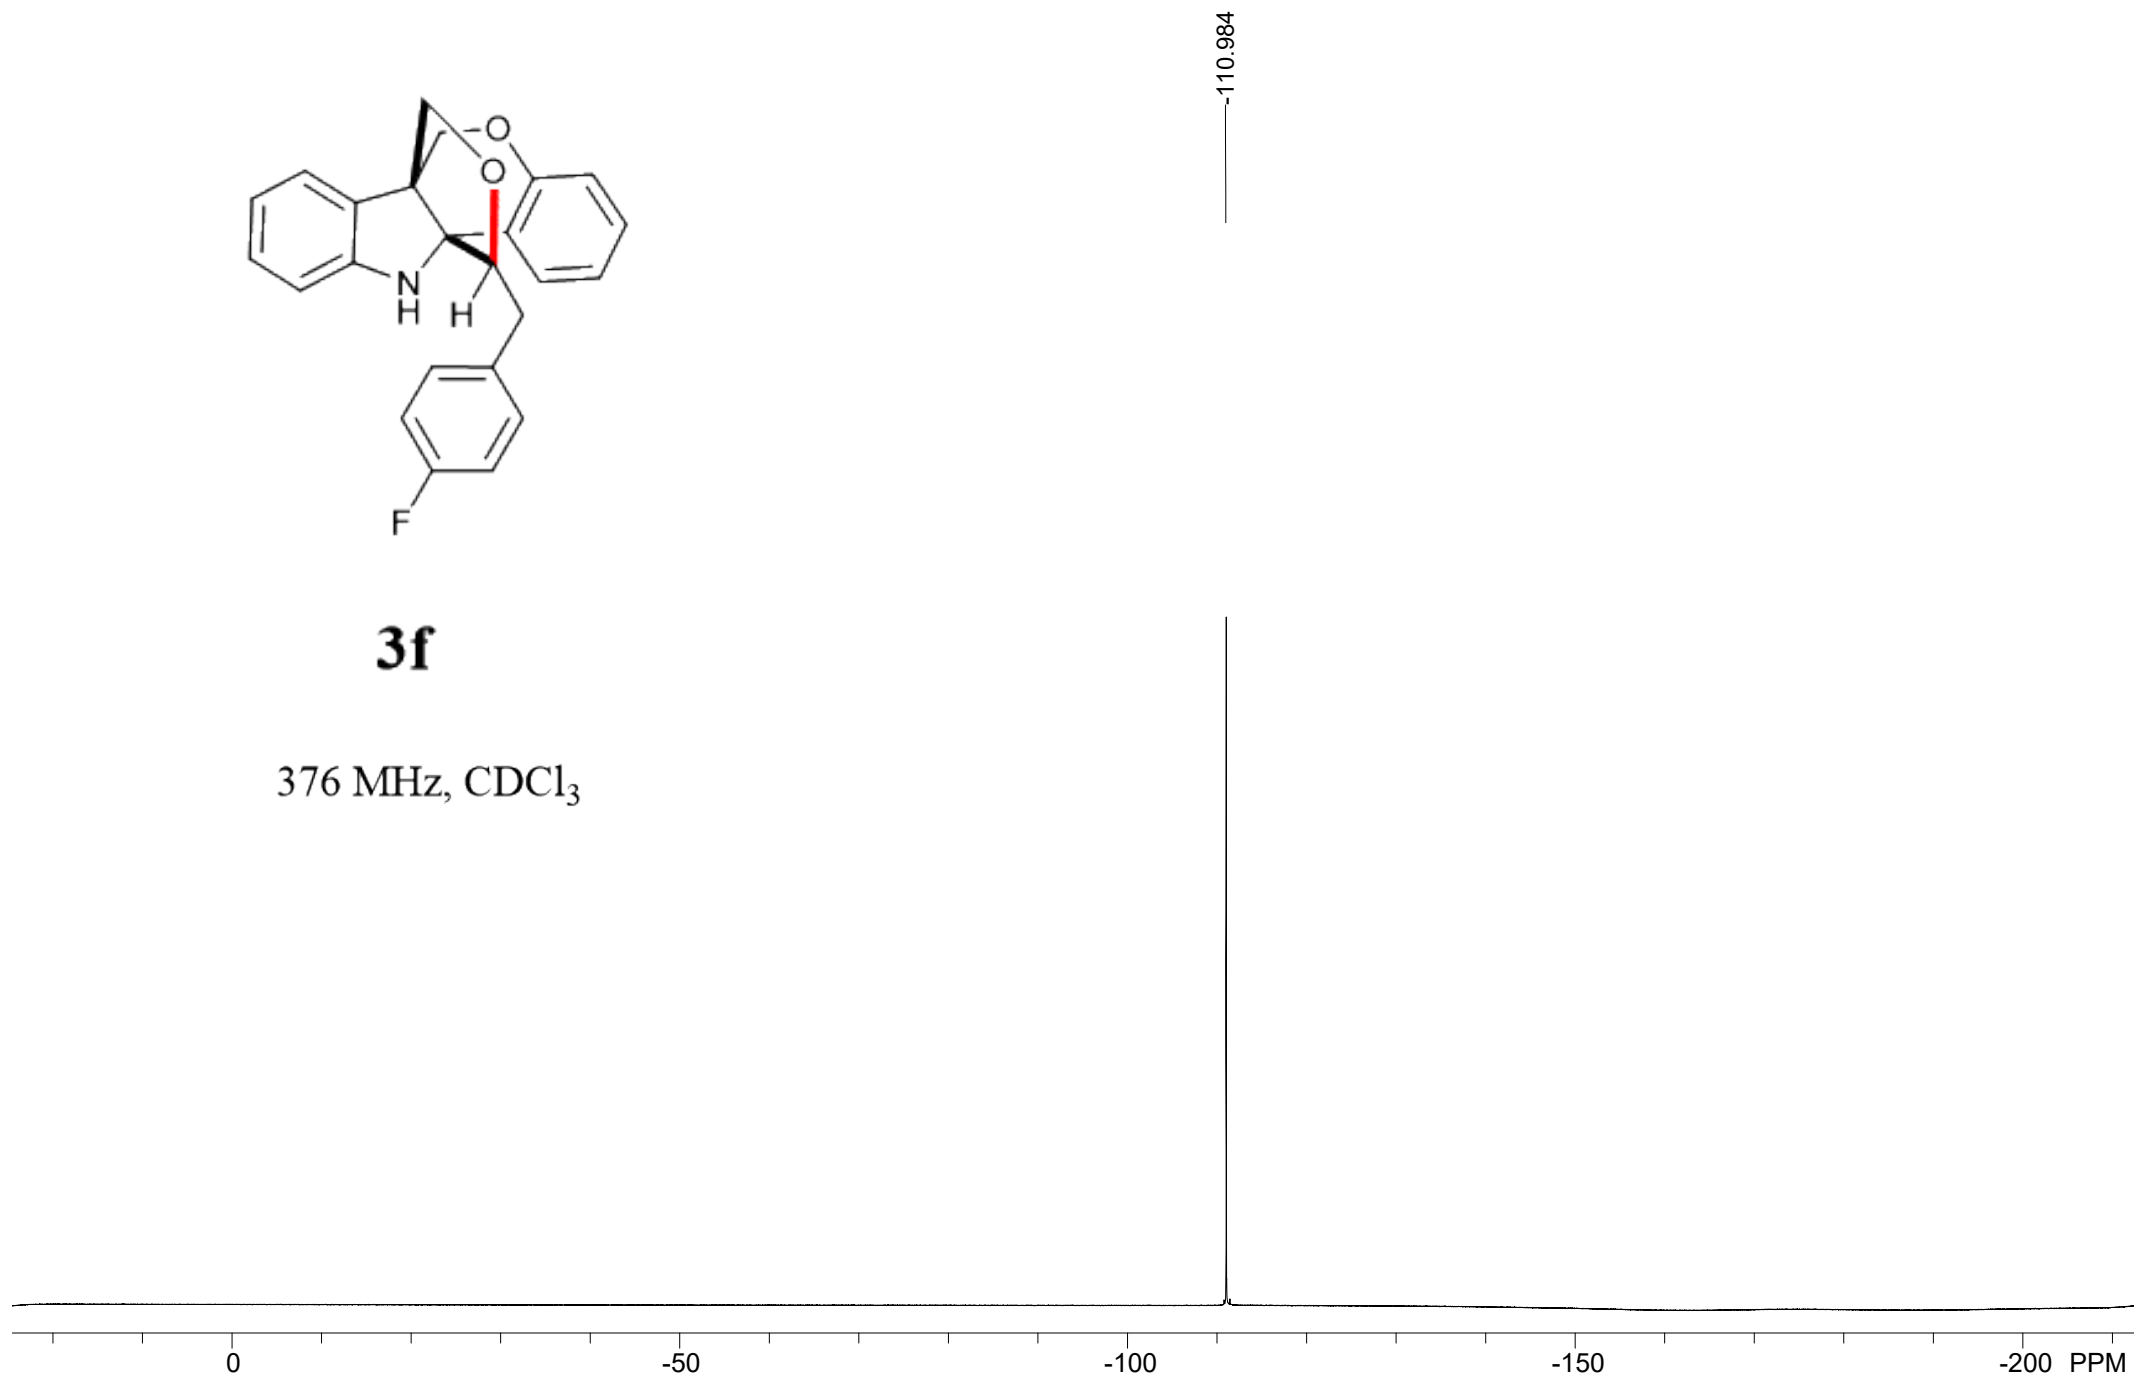

7.498  
7.479  
7.313  
7.293  
7.232  
7.214  
7.198  
7.182  
7.123  
7.104  
7.086  
7.059  
7.042  
7.025  
6.987  
6.966  
6.805  
6.787  
6.768  
6.703  
6.684

4.327  
4.298  
4.230  
4.207  
4.053  
4.031  
3.899  
3.870  
3.770  
3.762  
3.748  
3.740  
3.220  
3.184  
3.160  
3.124

0.000

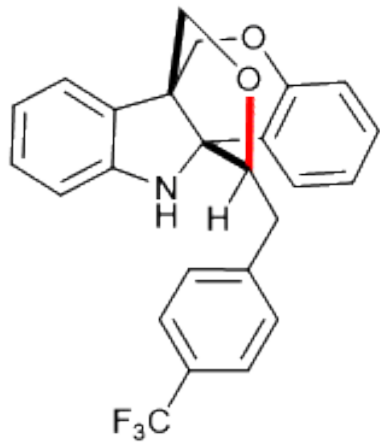

**3g**

400 MHz, CDCl<sub>3</sub>

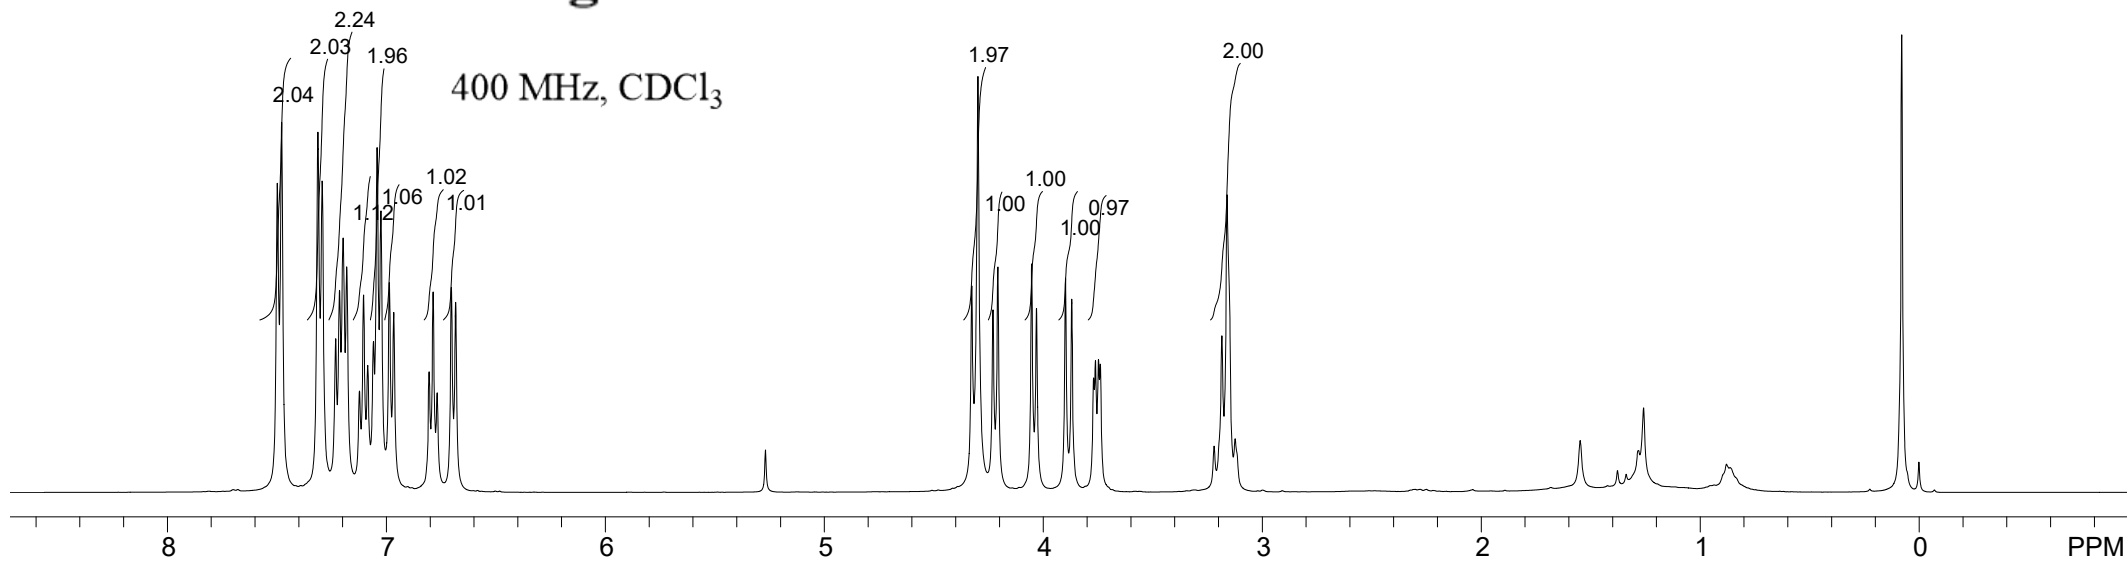



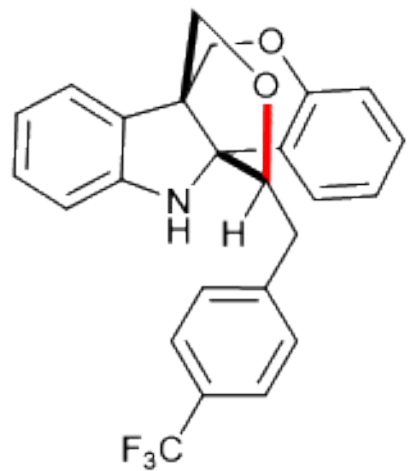

**3g**

100 MHz,  $CDCl_3$

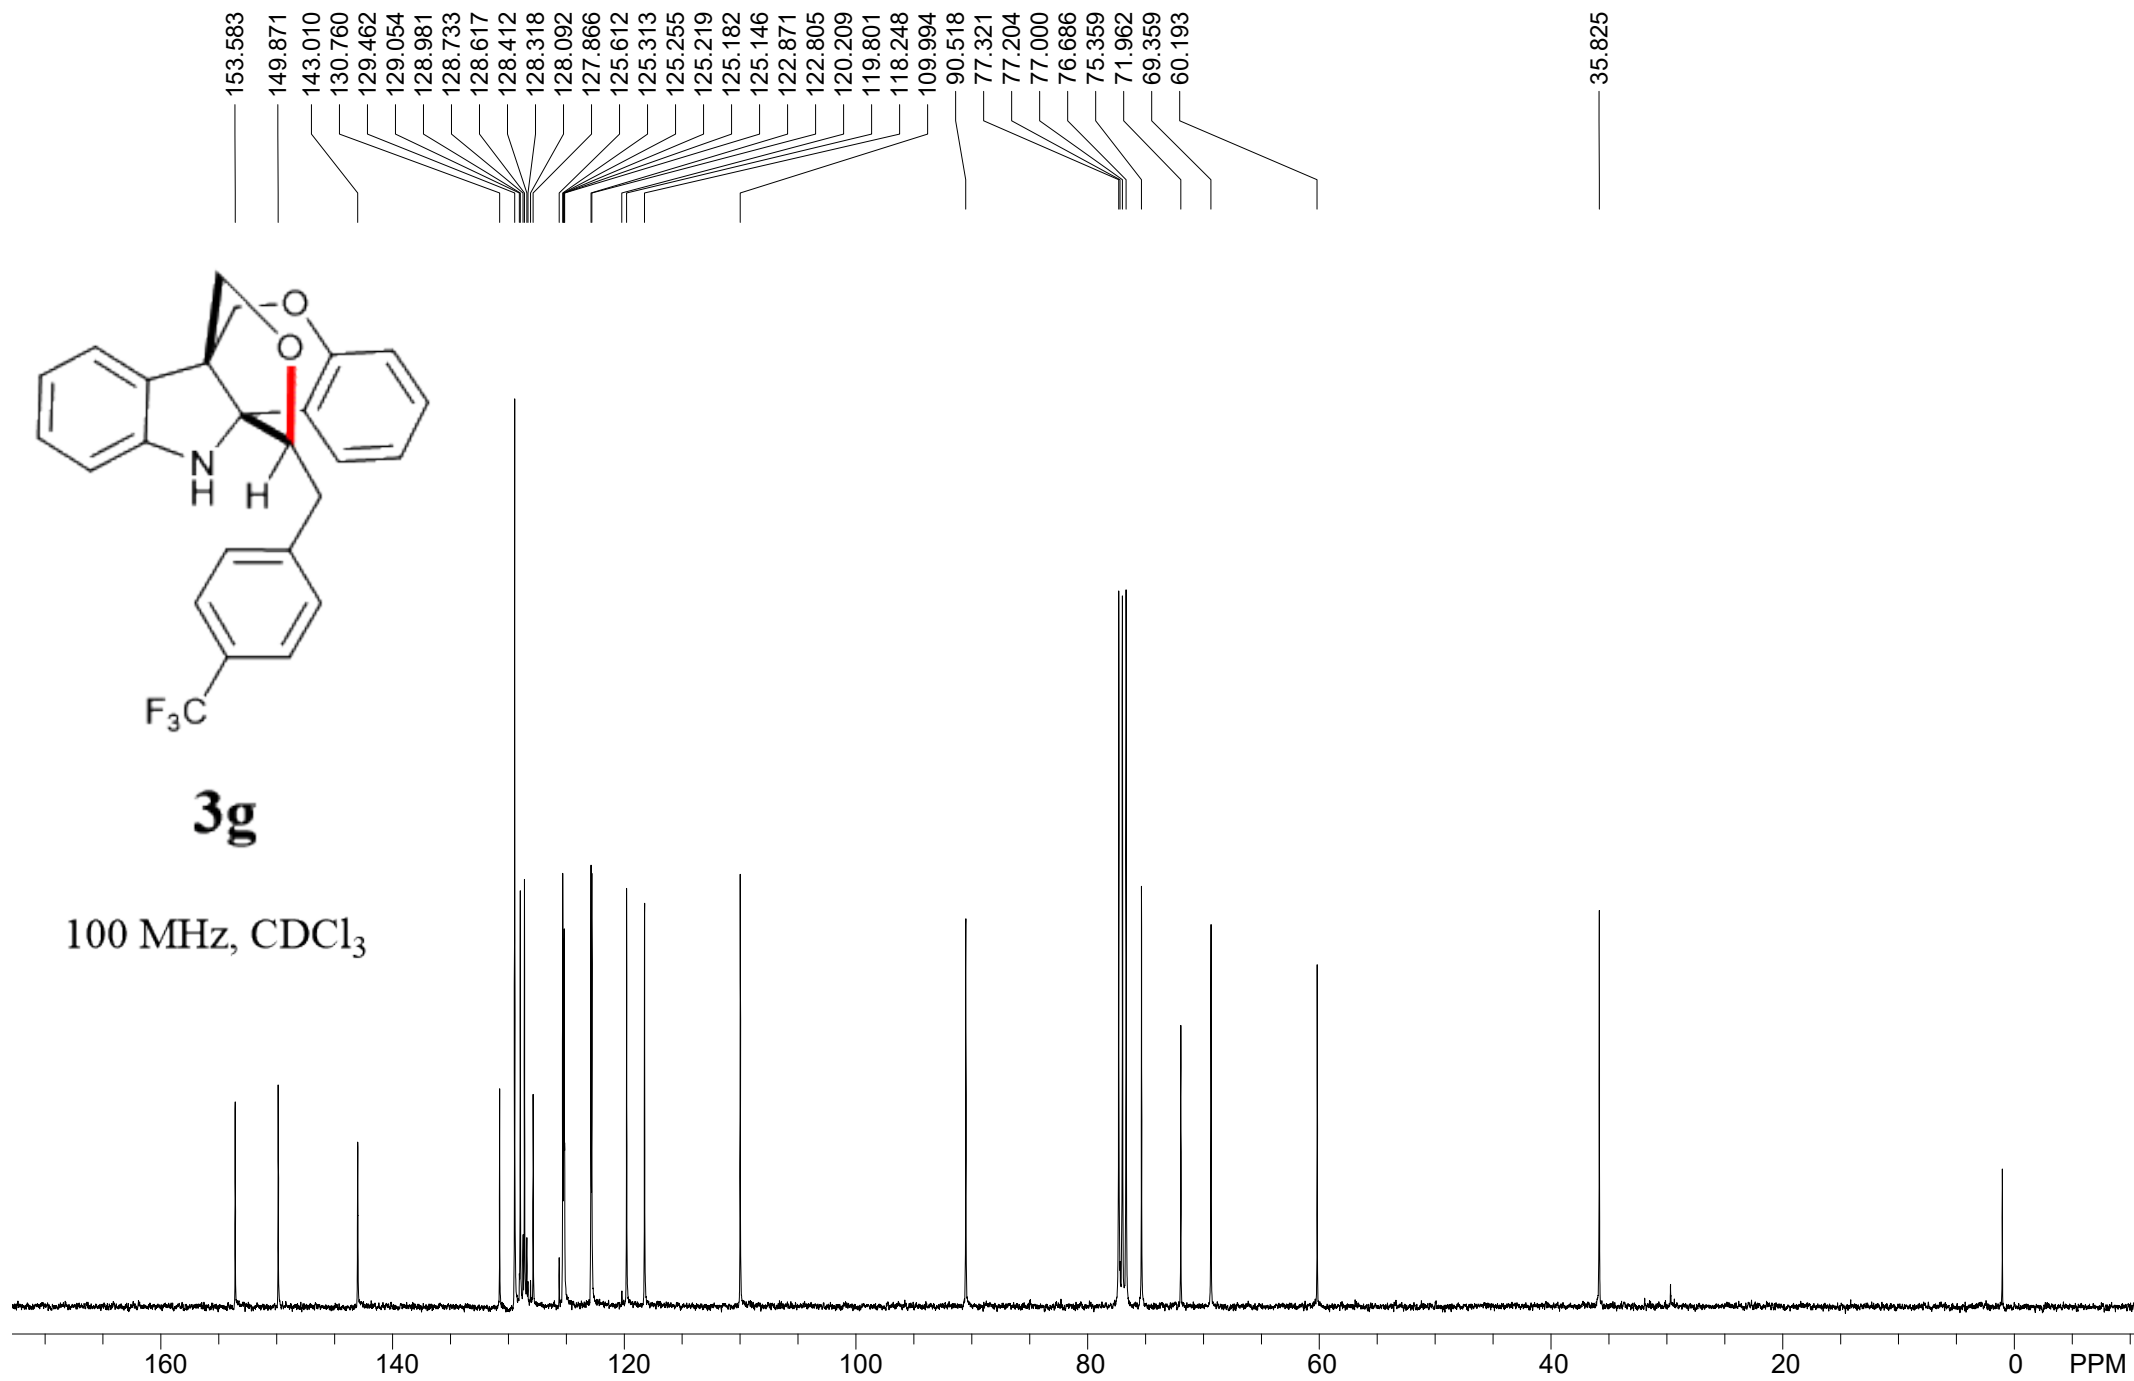

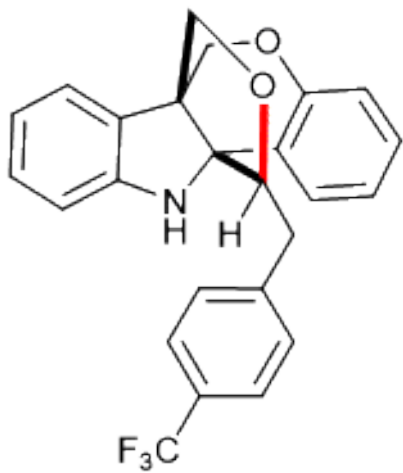

**3g**

376 MHz, CDCl<sub>3</sub>

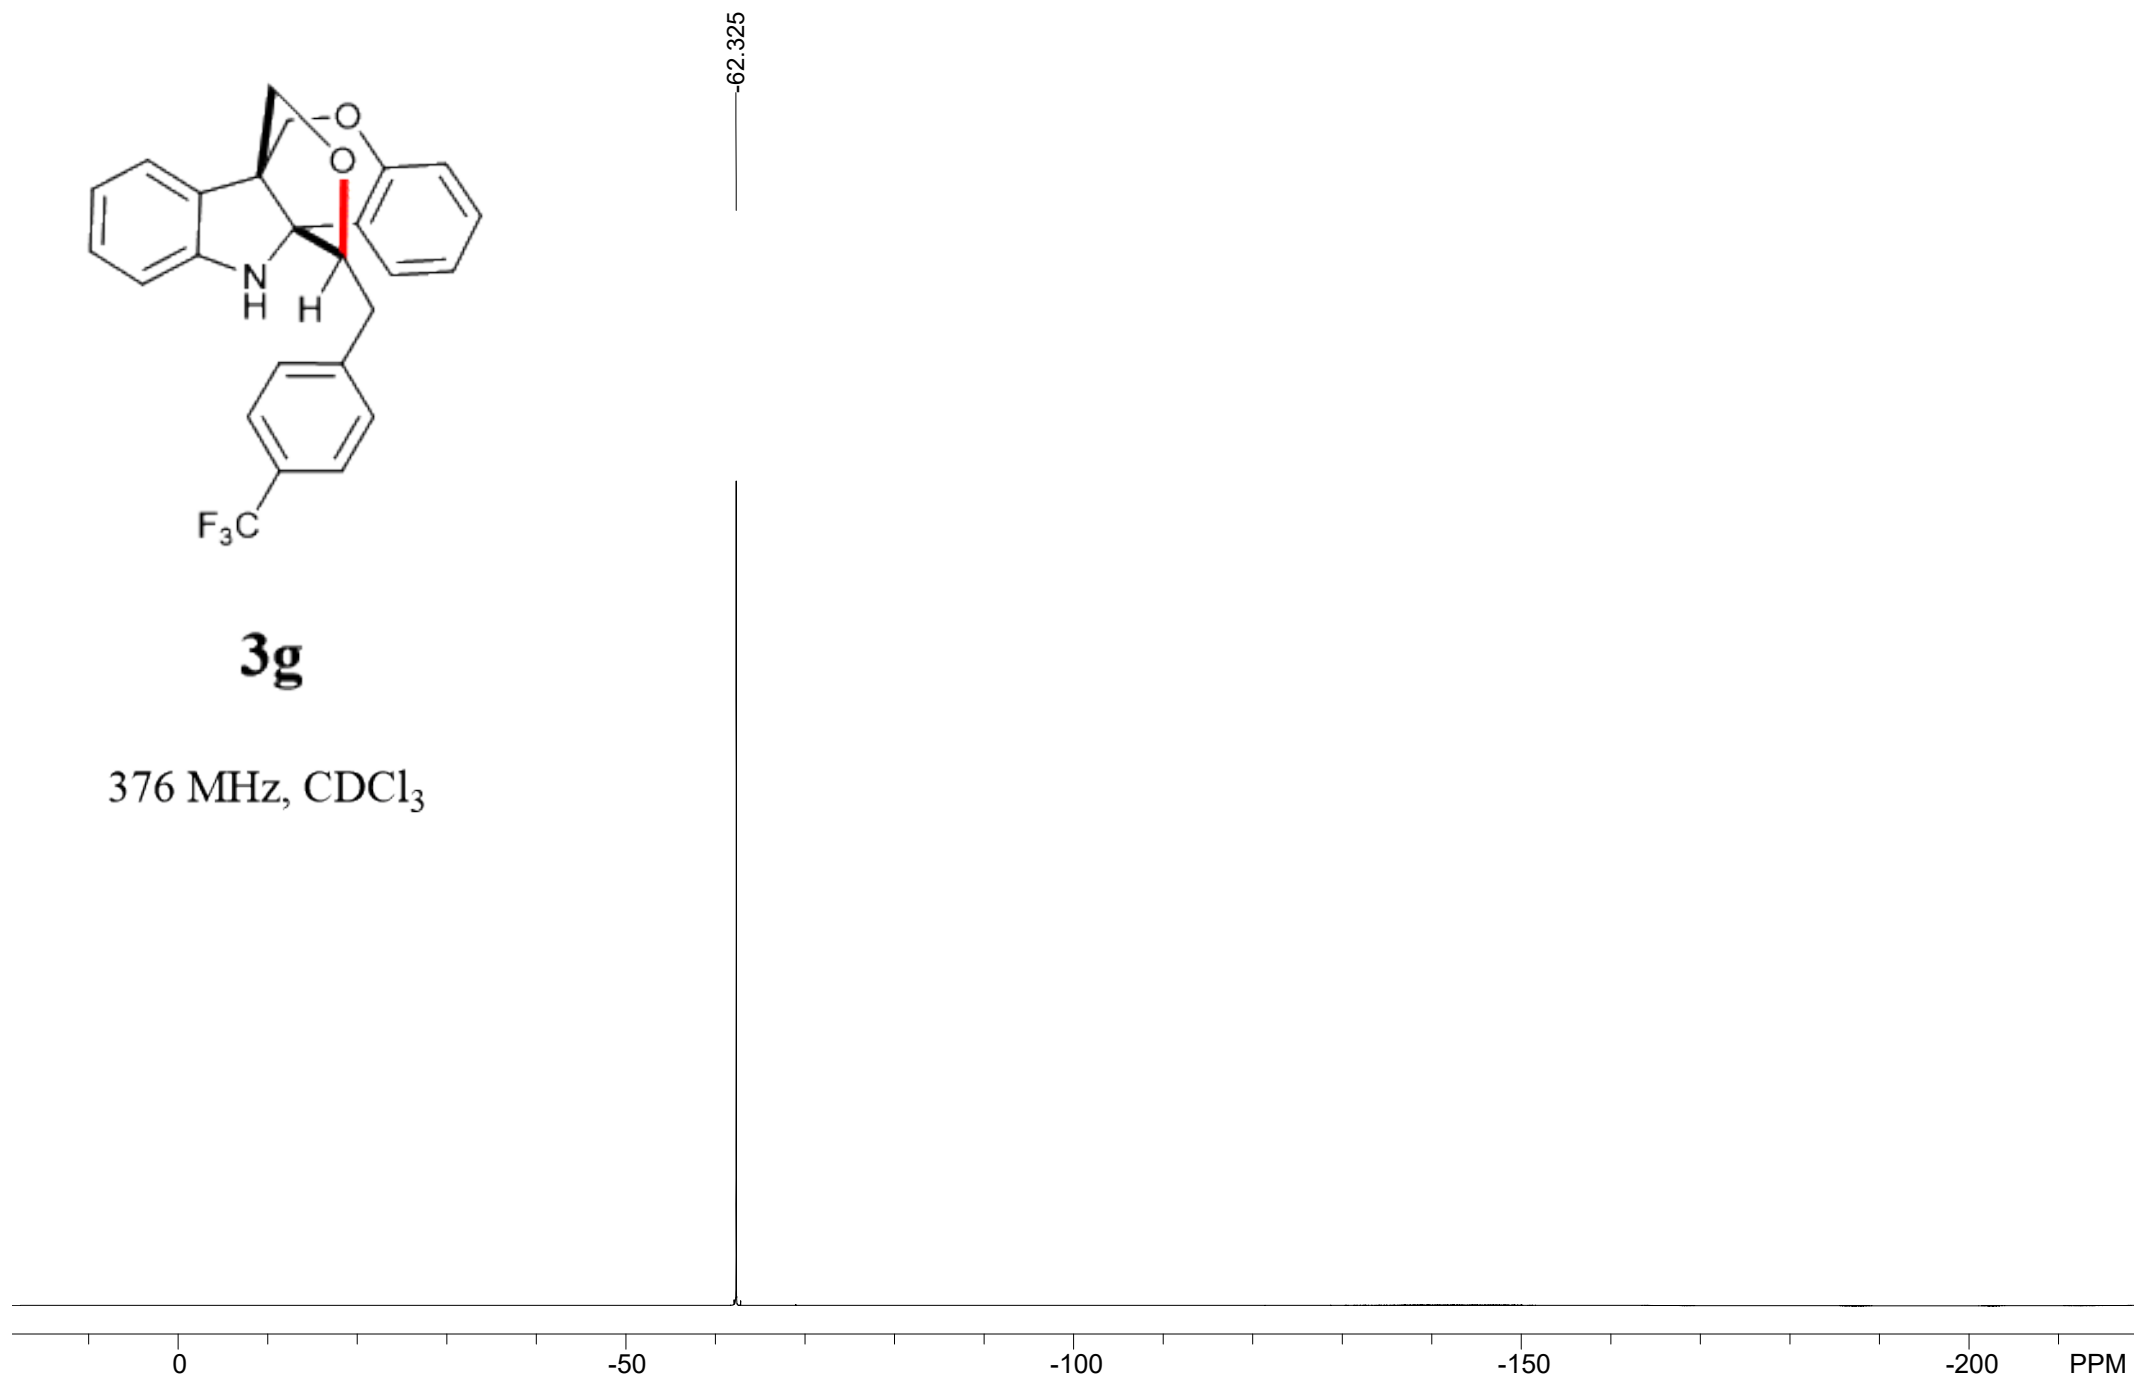

7.215  
7.196  
7.176  
7.157  
7.140  
7.121  
7.101  
7.082  
7.048  
7.030  
7.012  
6.993  
6.971  
6.951  
6.809  
6.792  
6.773  
6.756  
6.732  
6.696  
6.676

4.329  
4.300  
4.229  
4.207  
4.071  
4.048  
3.916  
3.888  
3.831  
3.815  
3.800  
3.791  
3.745  
3.105  
3.089

-0.000

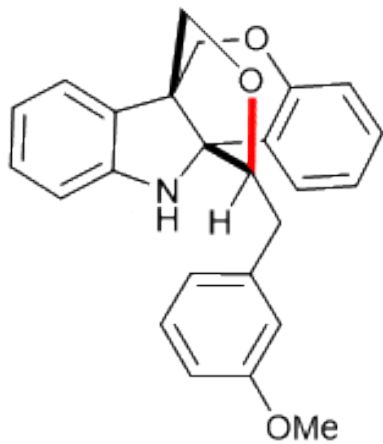

**3h**

400 MHz, CDCl<sub>3</sub>

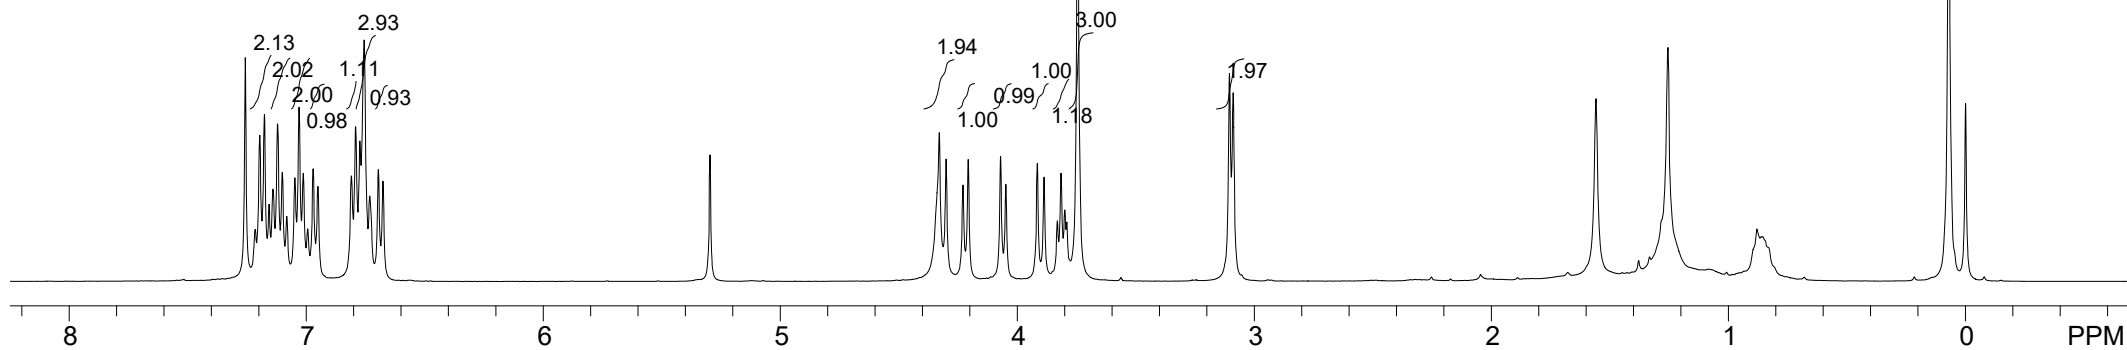

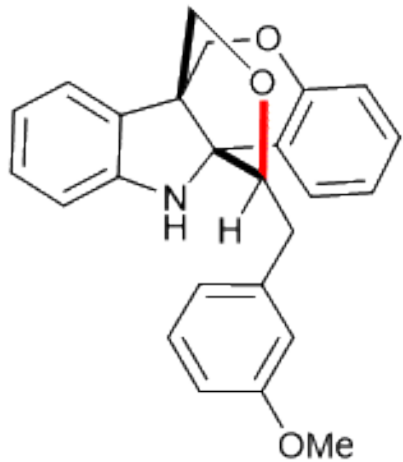

**3h**

100 MHz, CDCl<sub>3</sub>

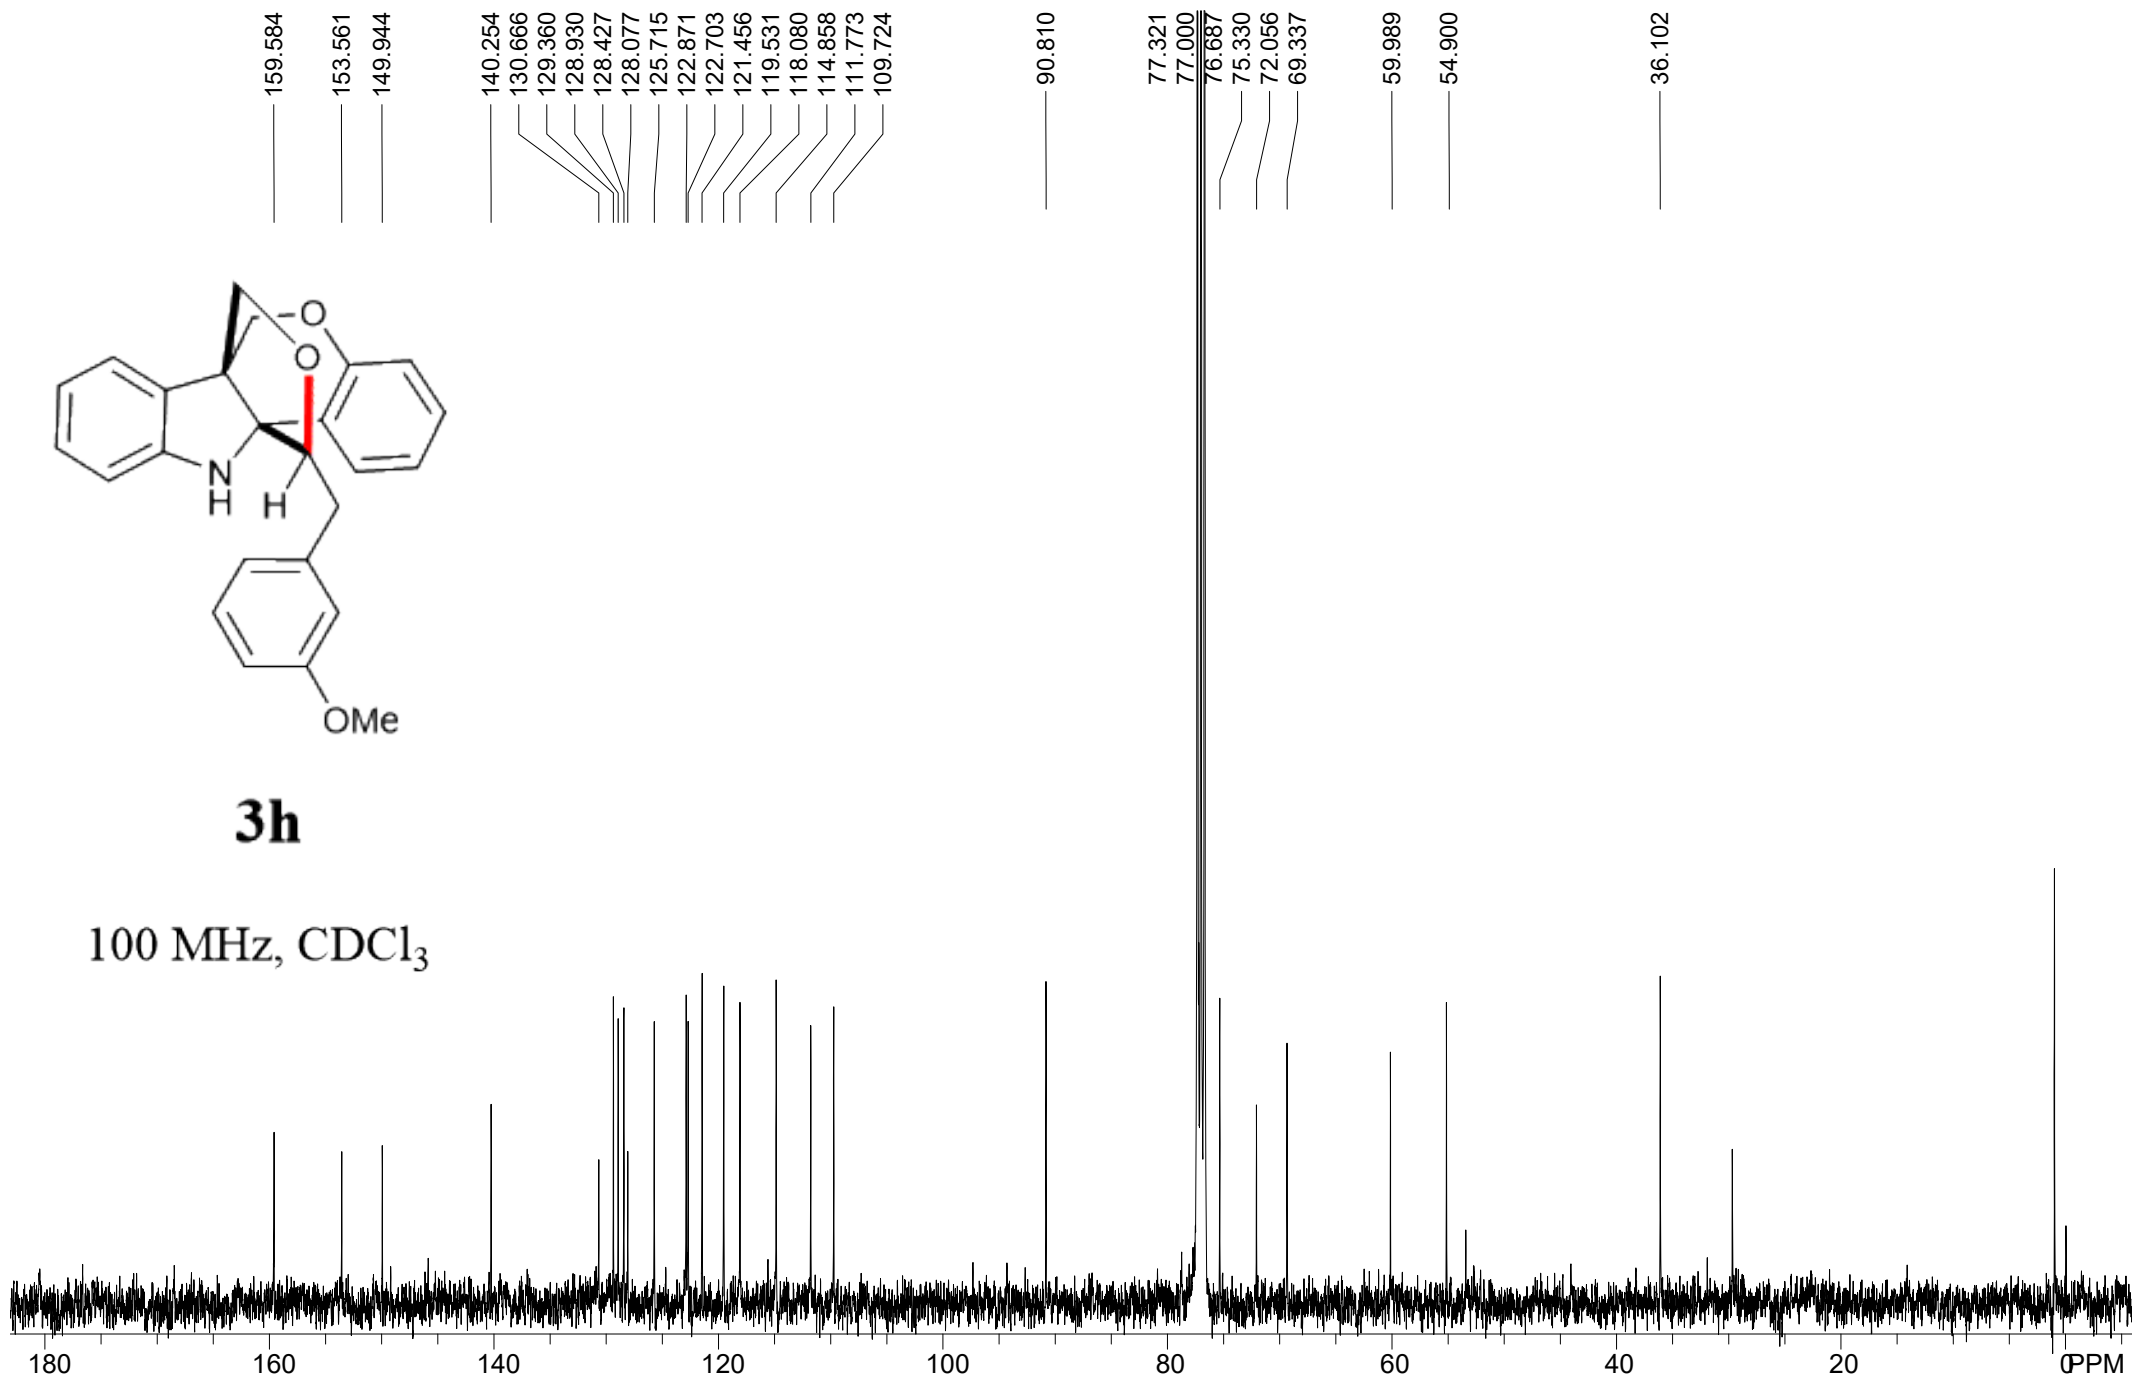

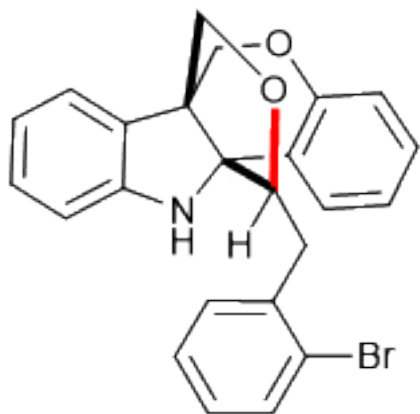

**3i**

400 MHz, CDCl<sub>3</sub>

7.490  
7.470  
7.366  
7.347  
7.323  
7.305  
7.257  
7.216  
7.198  
7.180  
7.128  
7.109  
7.089  
7.061  
7.044  
7.029  
6.963  
6.943  
6.803  
6.785  
6.767  
6.714  
6.695  
4.362  
4.317  
4.288  
4.219  
4.197  
4.051  
4.028  
3.956  
3.927  
3.895  
3.892  
3.424  
3.391  
3.388  
3.151  
3.126  
3.116  
3.091  
-0.000

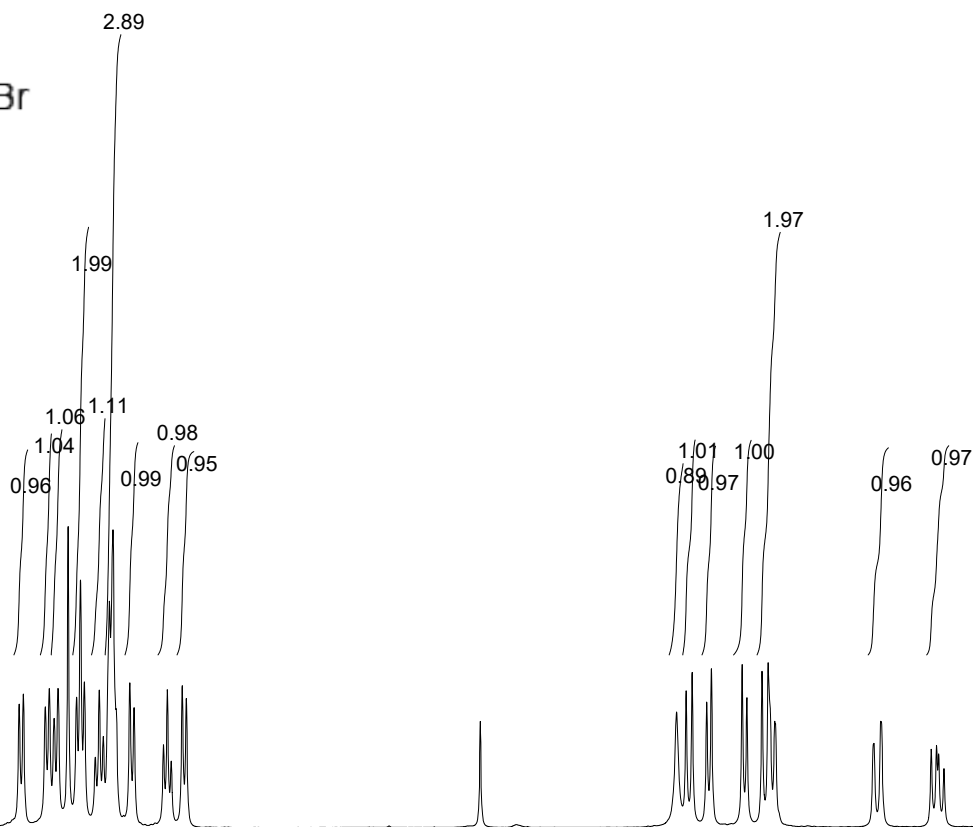

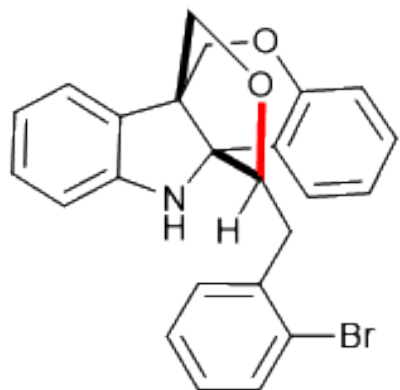

**3i**

100 MHz, CDCl<sub>3</sub>

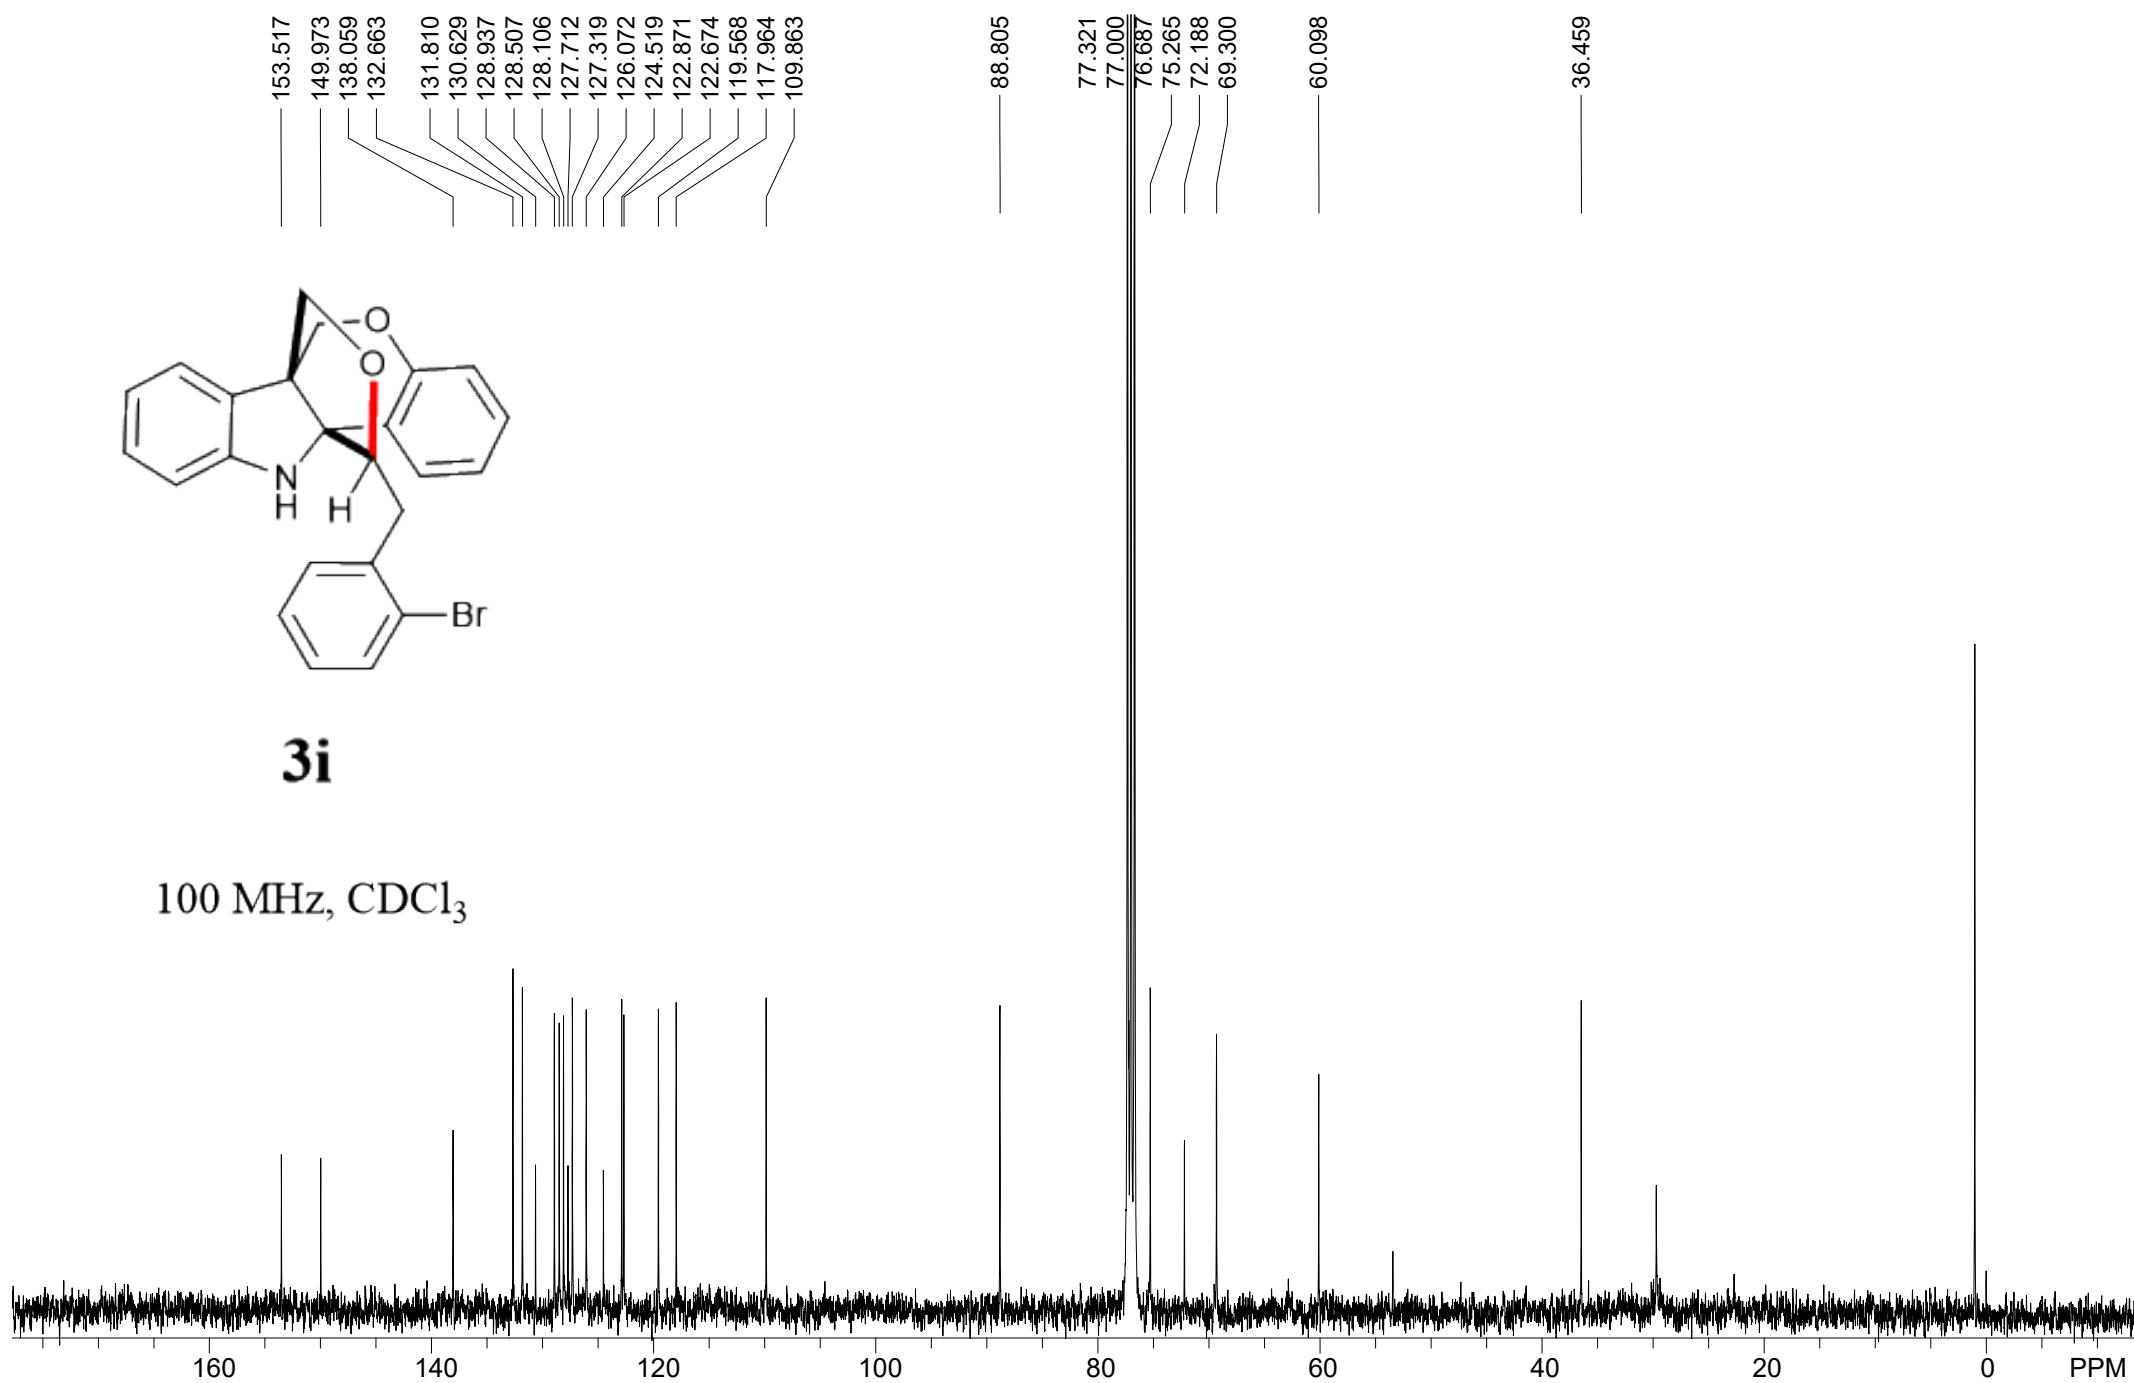

7.309  
7.182  
7.163  
7.145  
7.102  
7.083  
7.064  
7.038  
7.020  
6.973  
6.952  
6.930  
6.878  
6.860  
6.778  
6.759  
6.740  
6.671  
6.652  
6.305  
6.138  
6.132

4.387  
4.307  
4.279  
4.252  
4.233  
4.210  
4.114  
4.092  
3.993  
3.977  
3.960  
3.899  
3.870  
3.179  
3.163

0.000

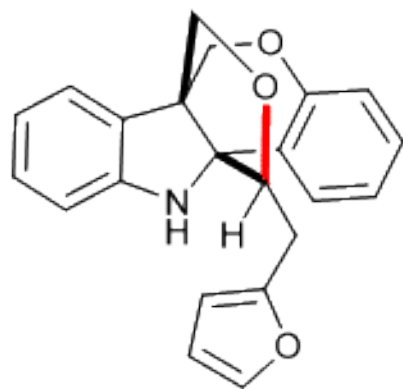

**3j**

400 MHz, CDCl<sub>3</sub>

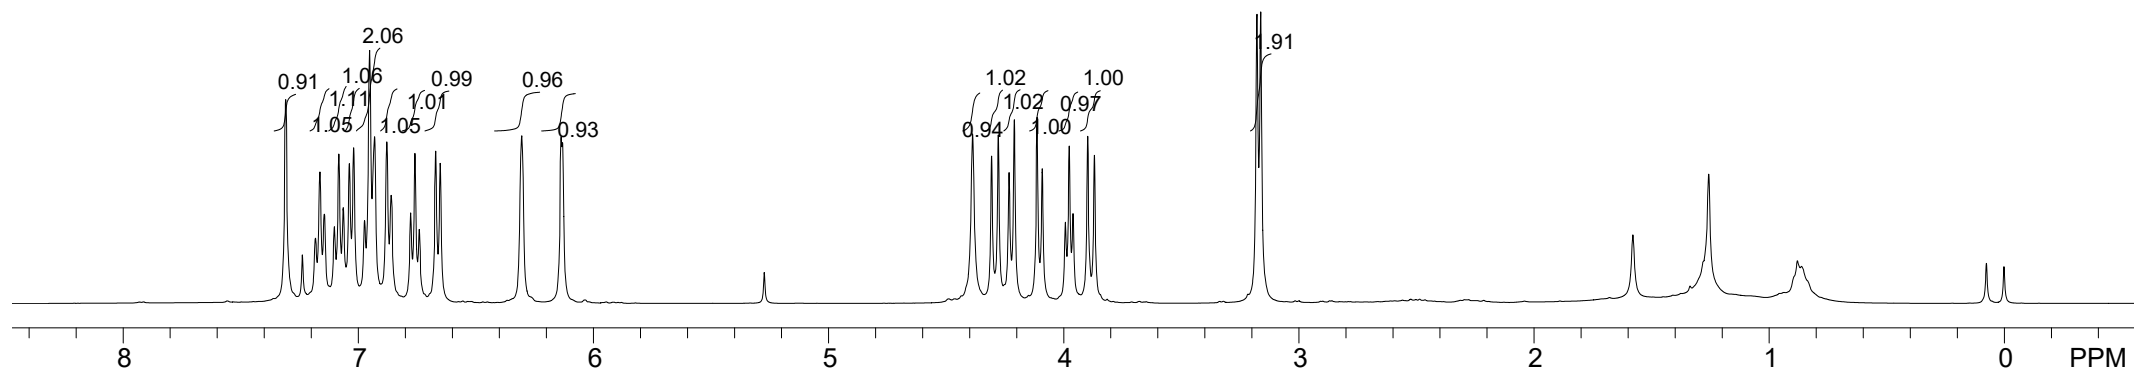

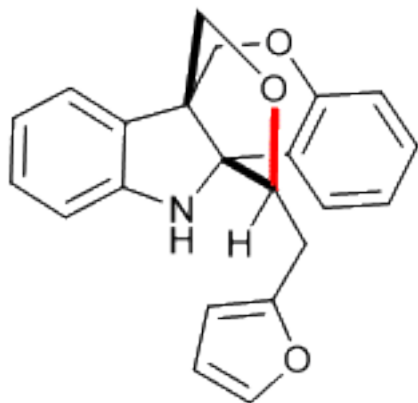

3j

100 MHz, CDCl<sub>3</sub>

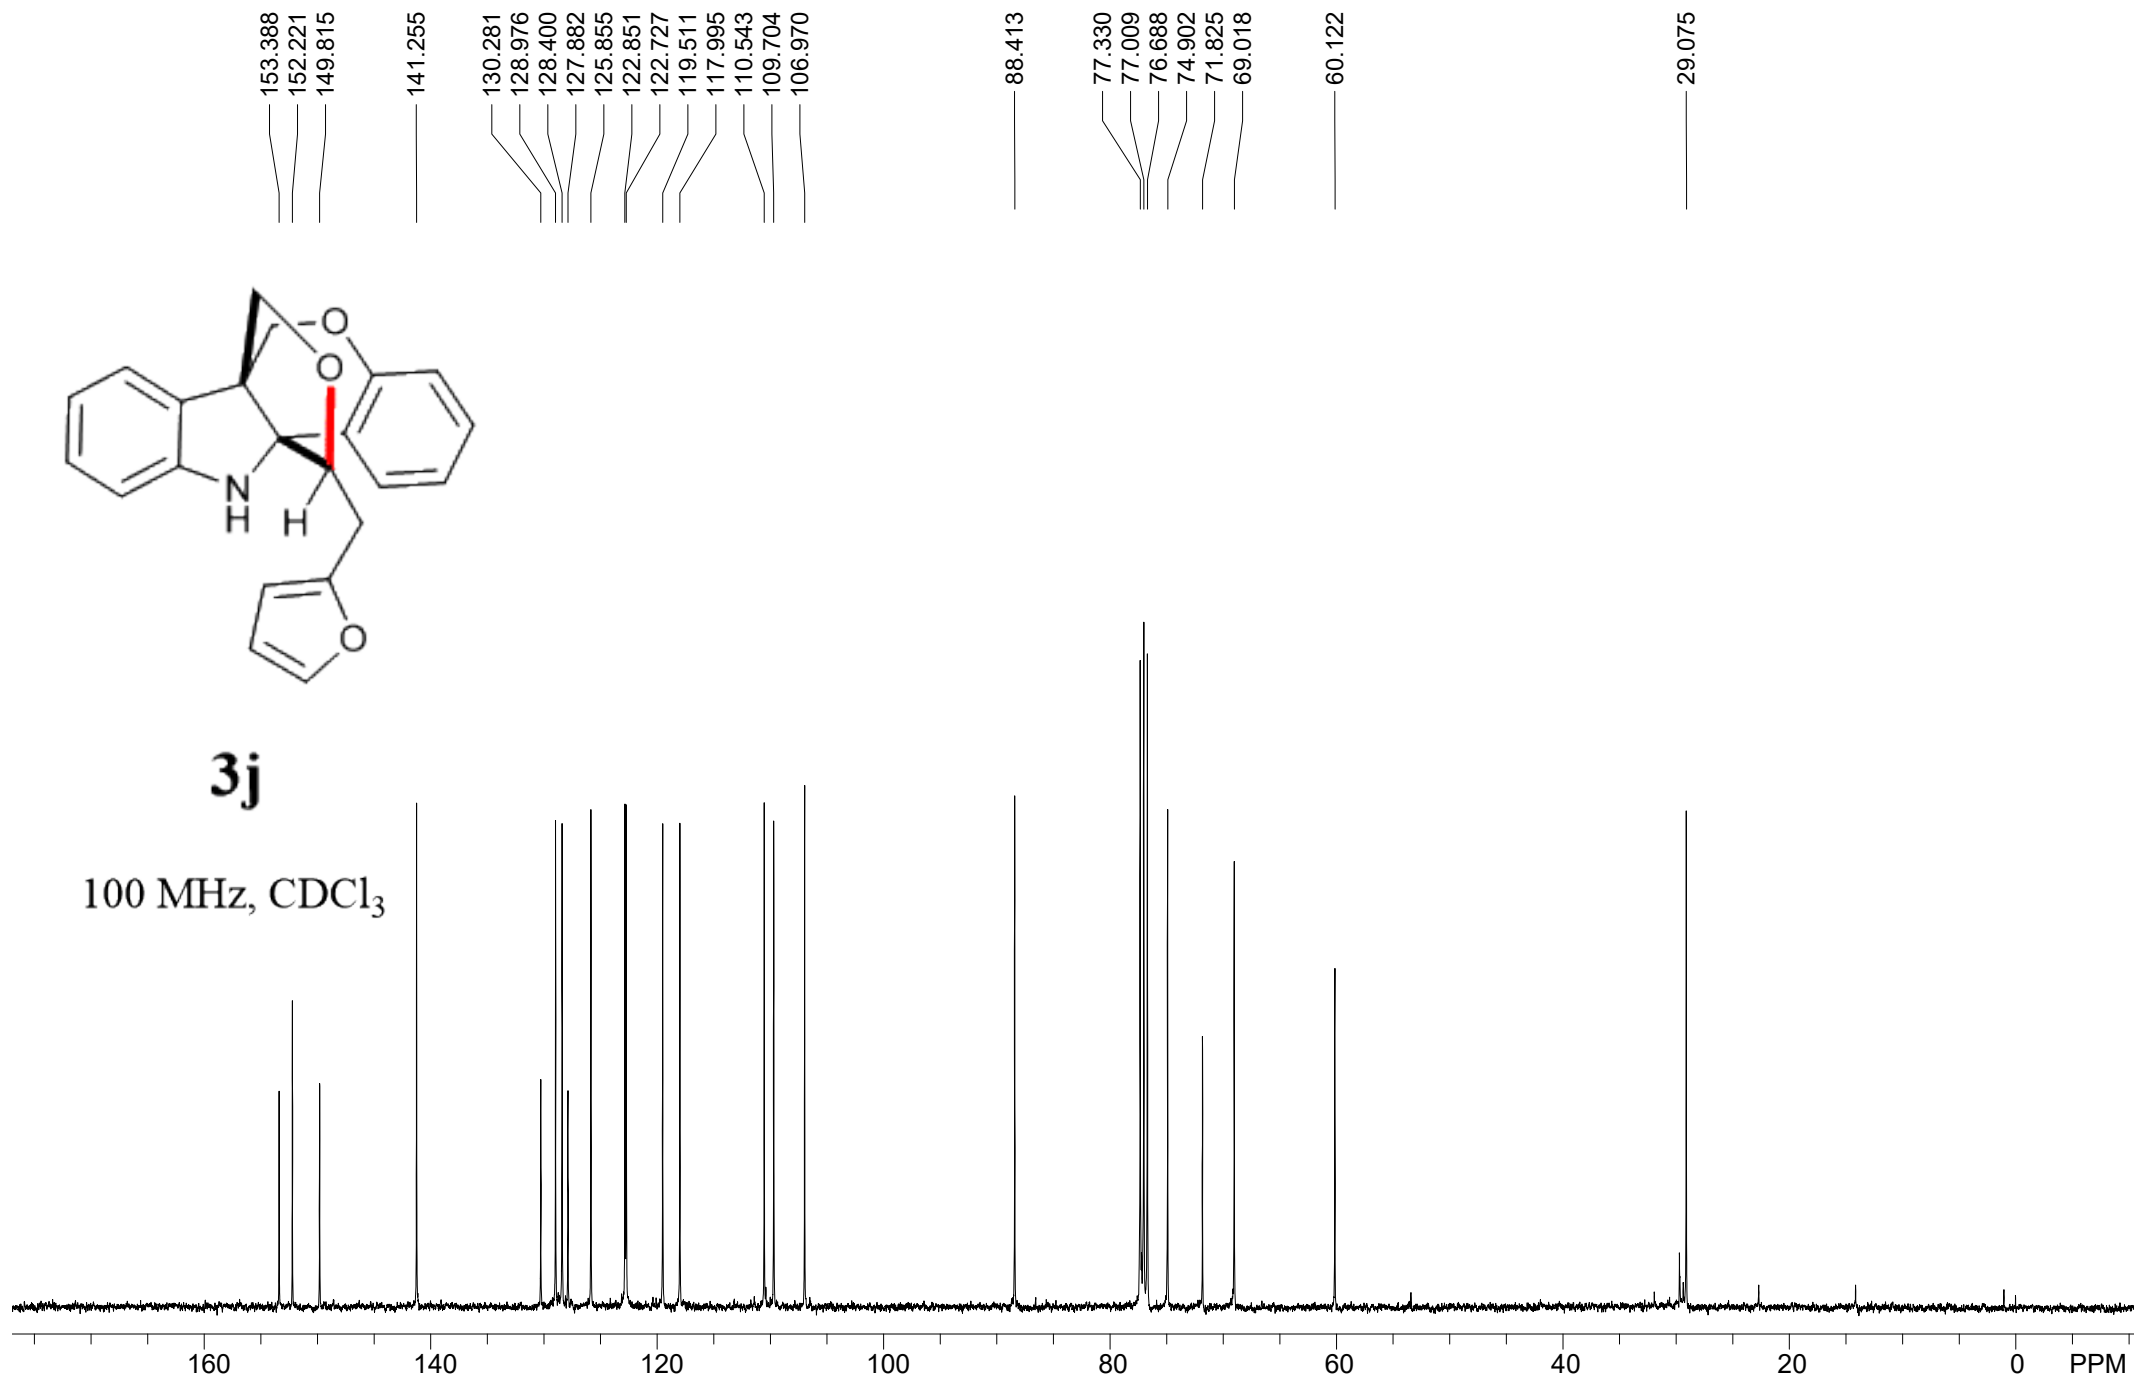



7.267  
7.249  
7.231  
7.213  
7.196  
7.179  
7.168  
7.157  
7.136  
7.020  
7.002  
6.984  
6.962  
6.942  
6.693  
6.674  
6.649

4.299  
4.270  
4.219  
4.197  
4.032  
4.010  
3.907  
3.878  
3.809  
3.744  
3.172  
3.162  
3.131  
3.111  
3.075

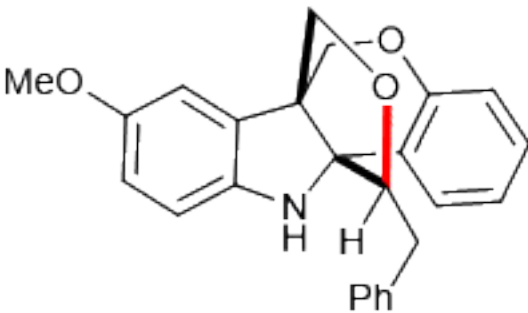

**3k**

400 MHz, CDCl<sub>3</sub>

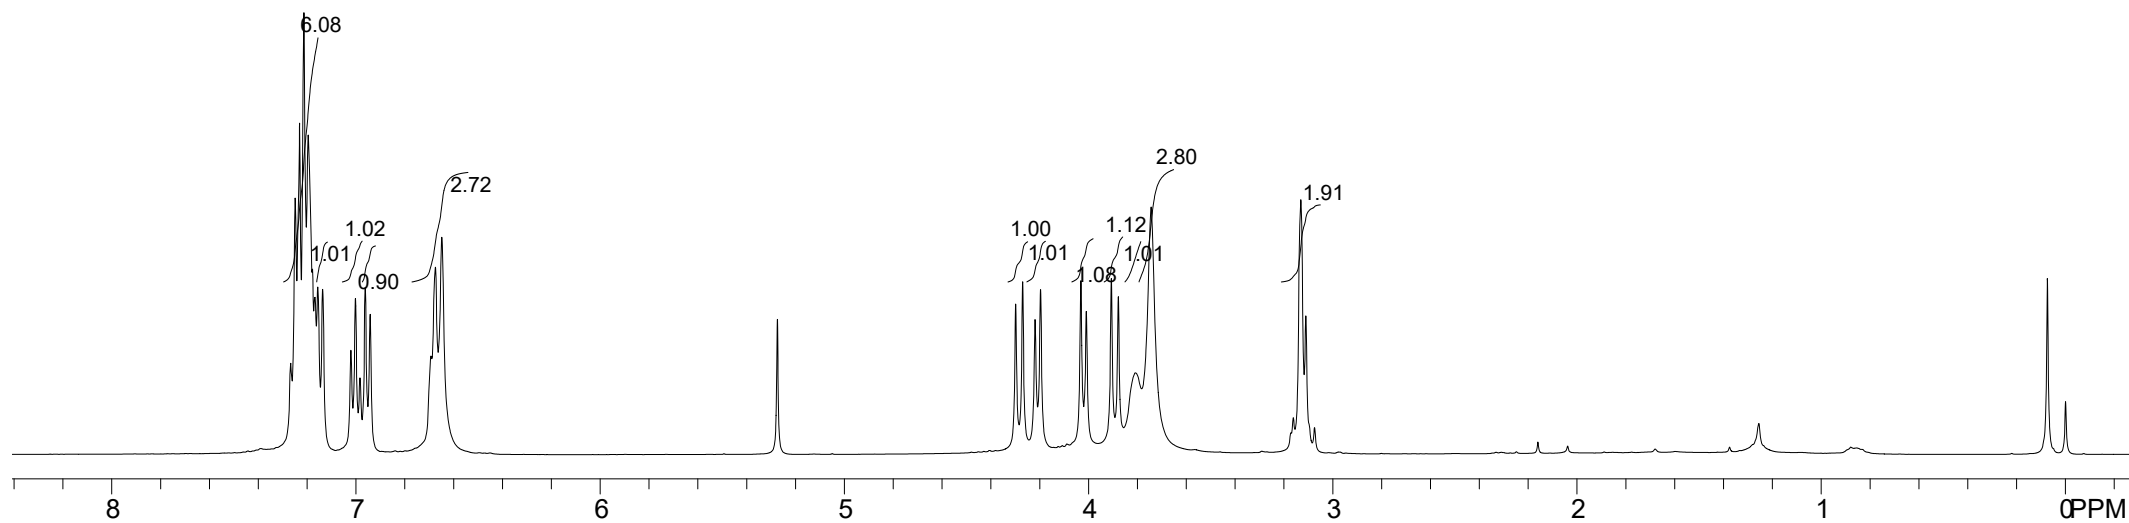

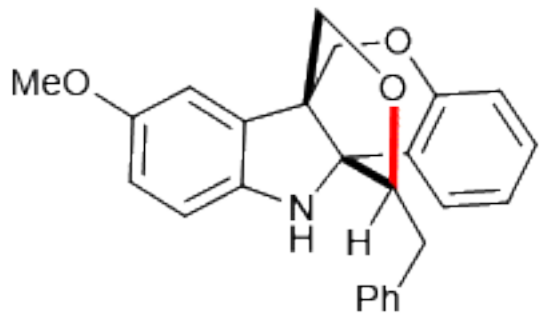

**3k**

100 MHz, CDCl<sub>3</sub>

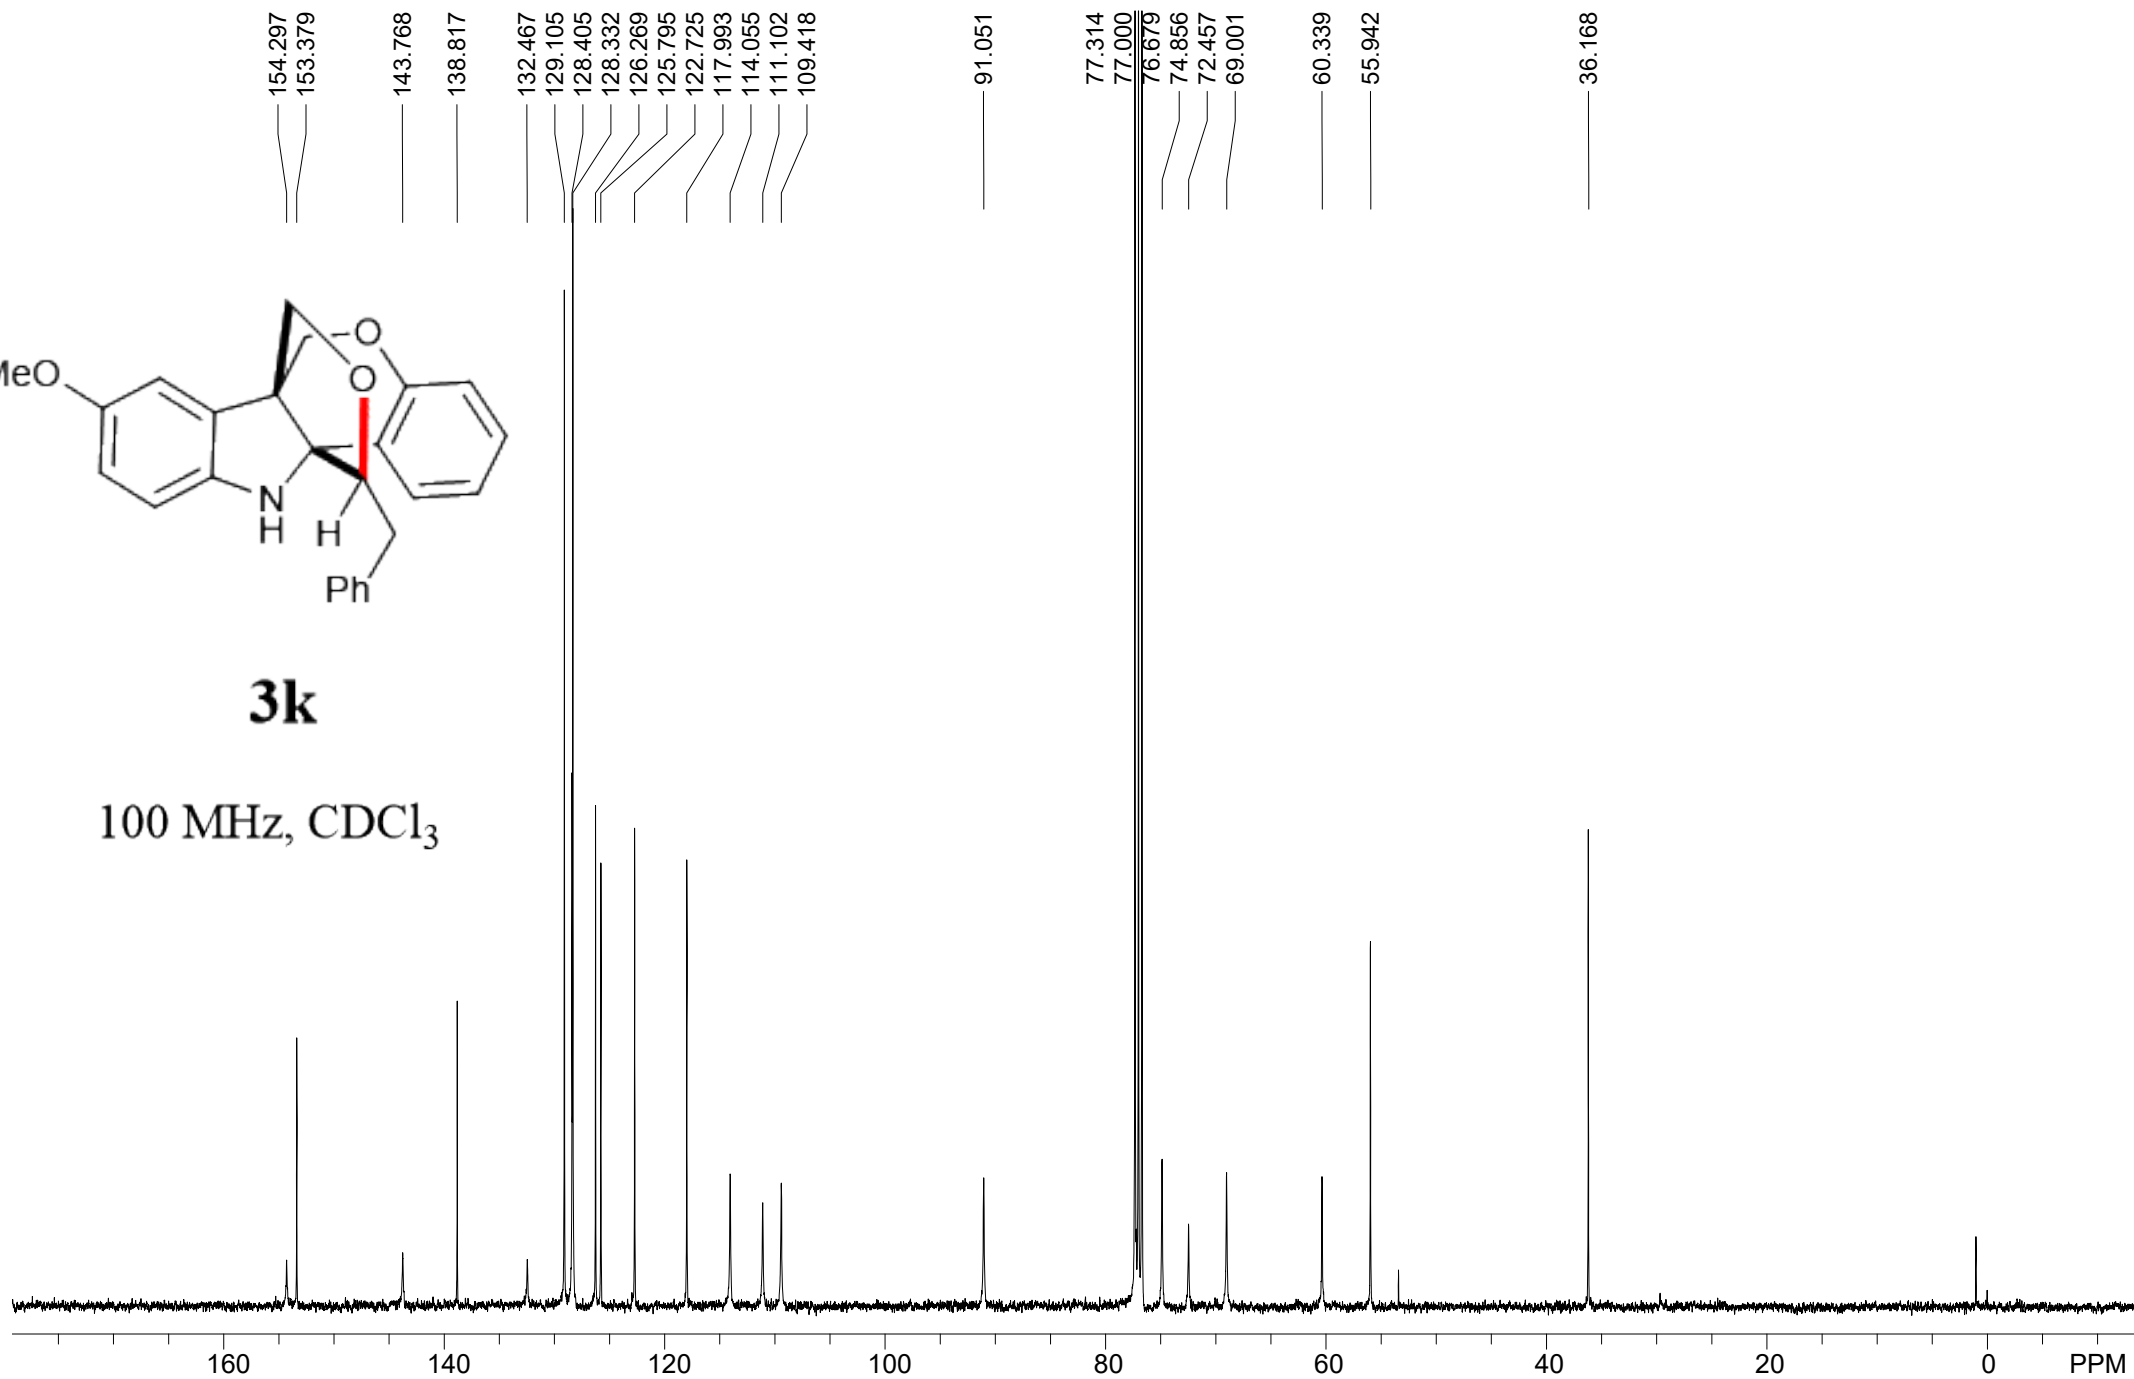

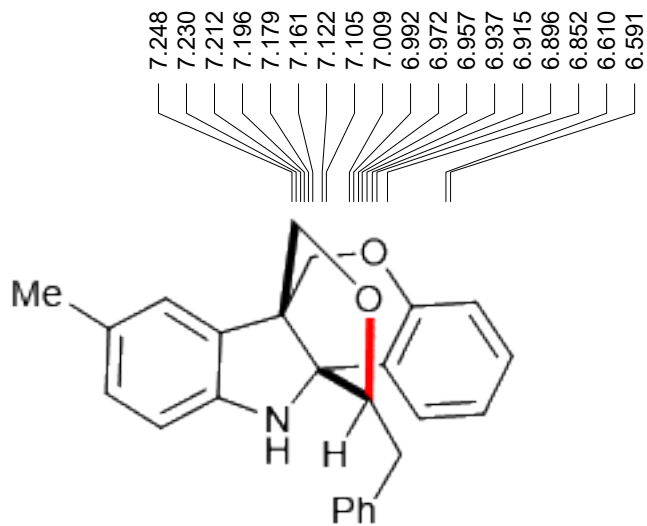

**31**

400 MHz, CDCl<sub>3</sub>

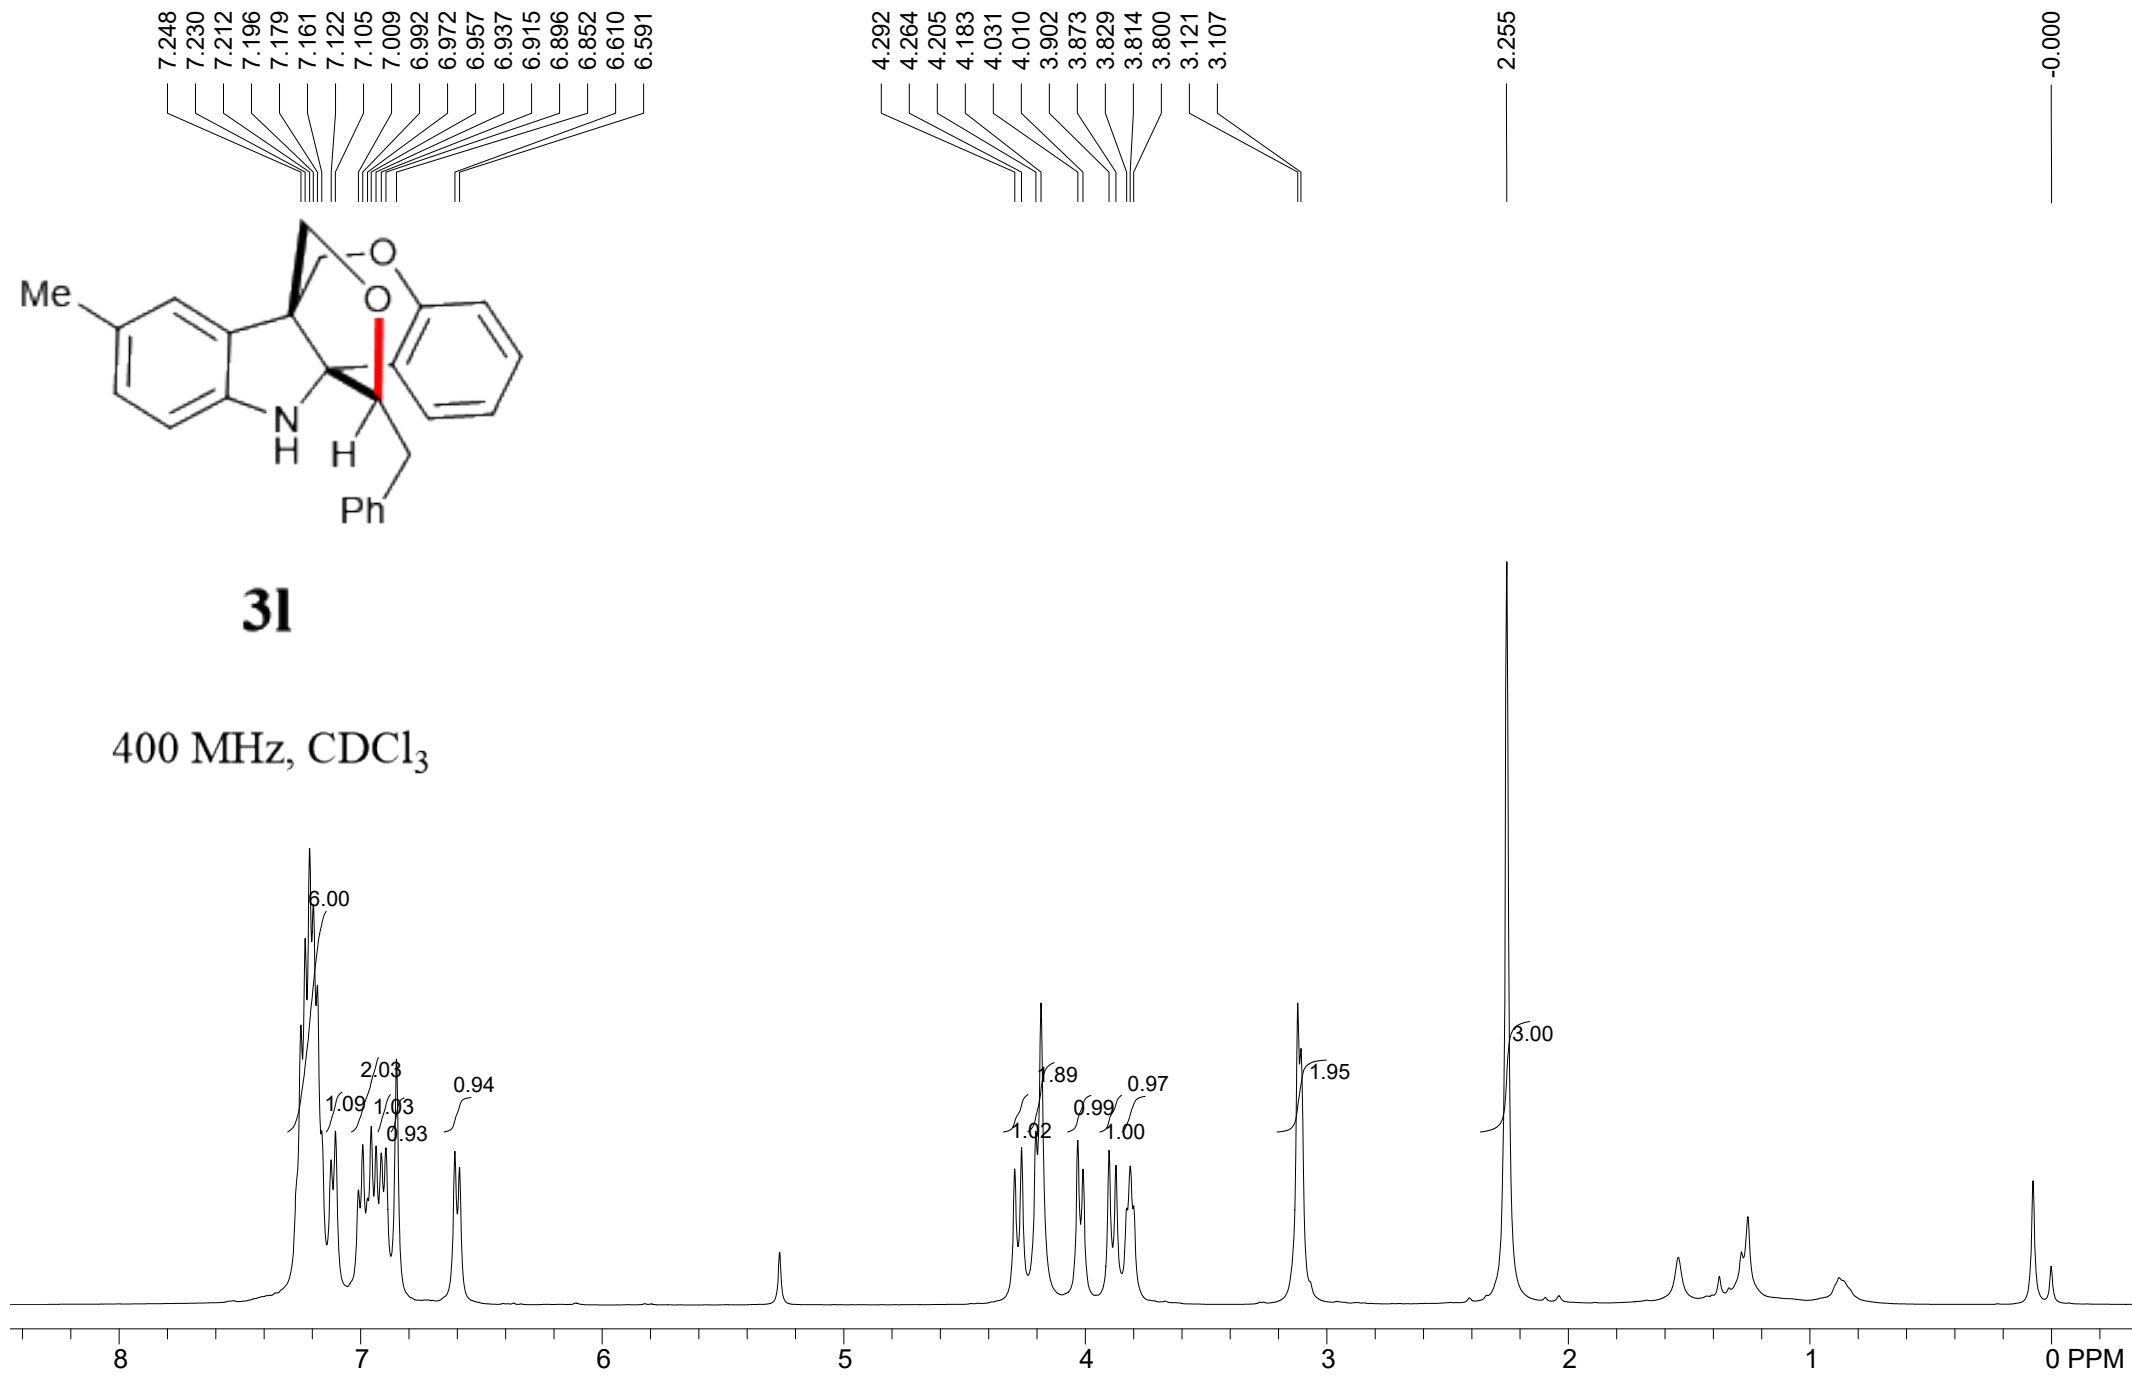

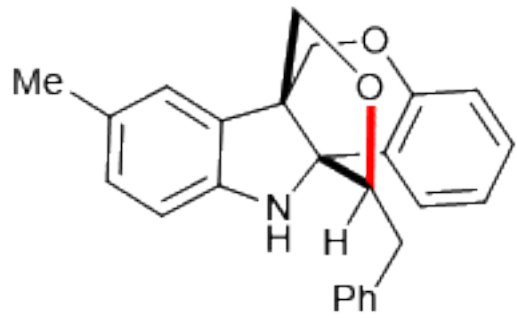

**31**

100 MHz, CDCl<sub>3</sub>

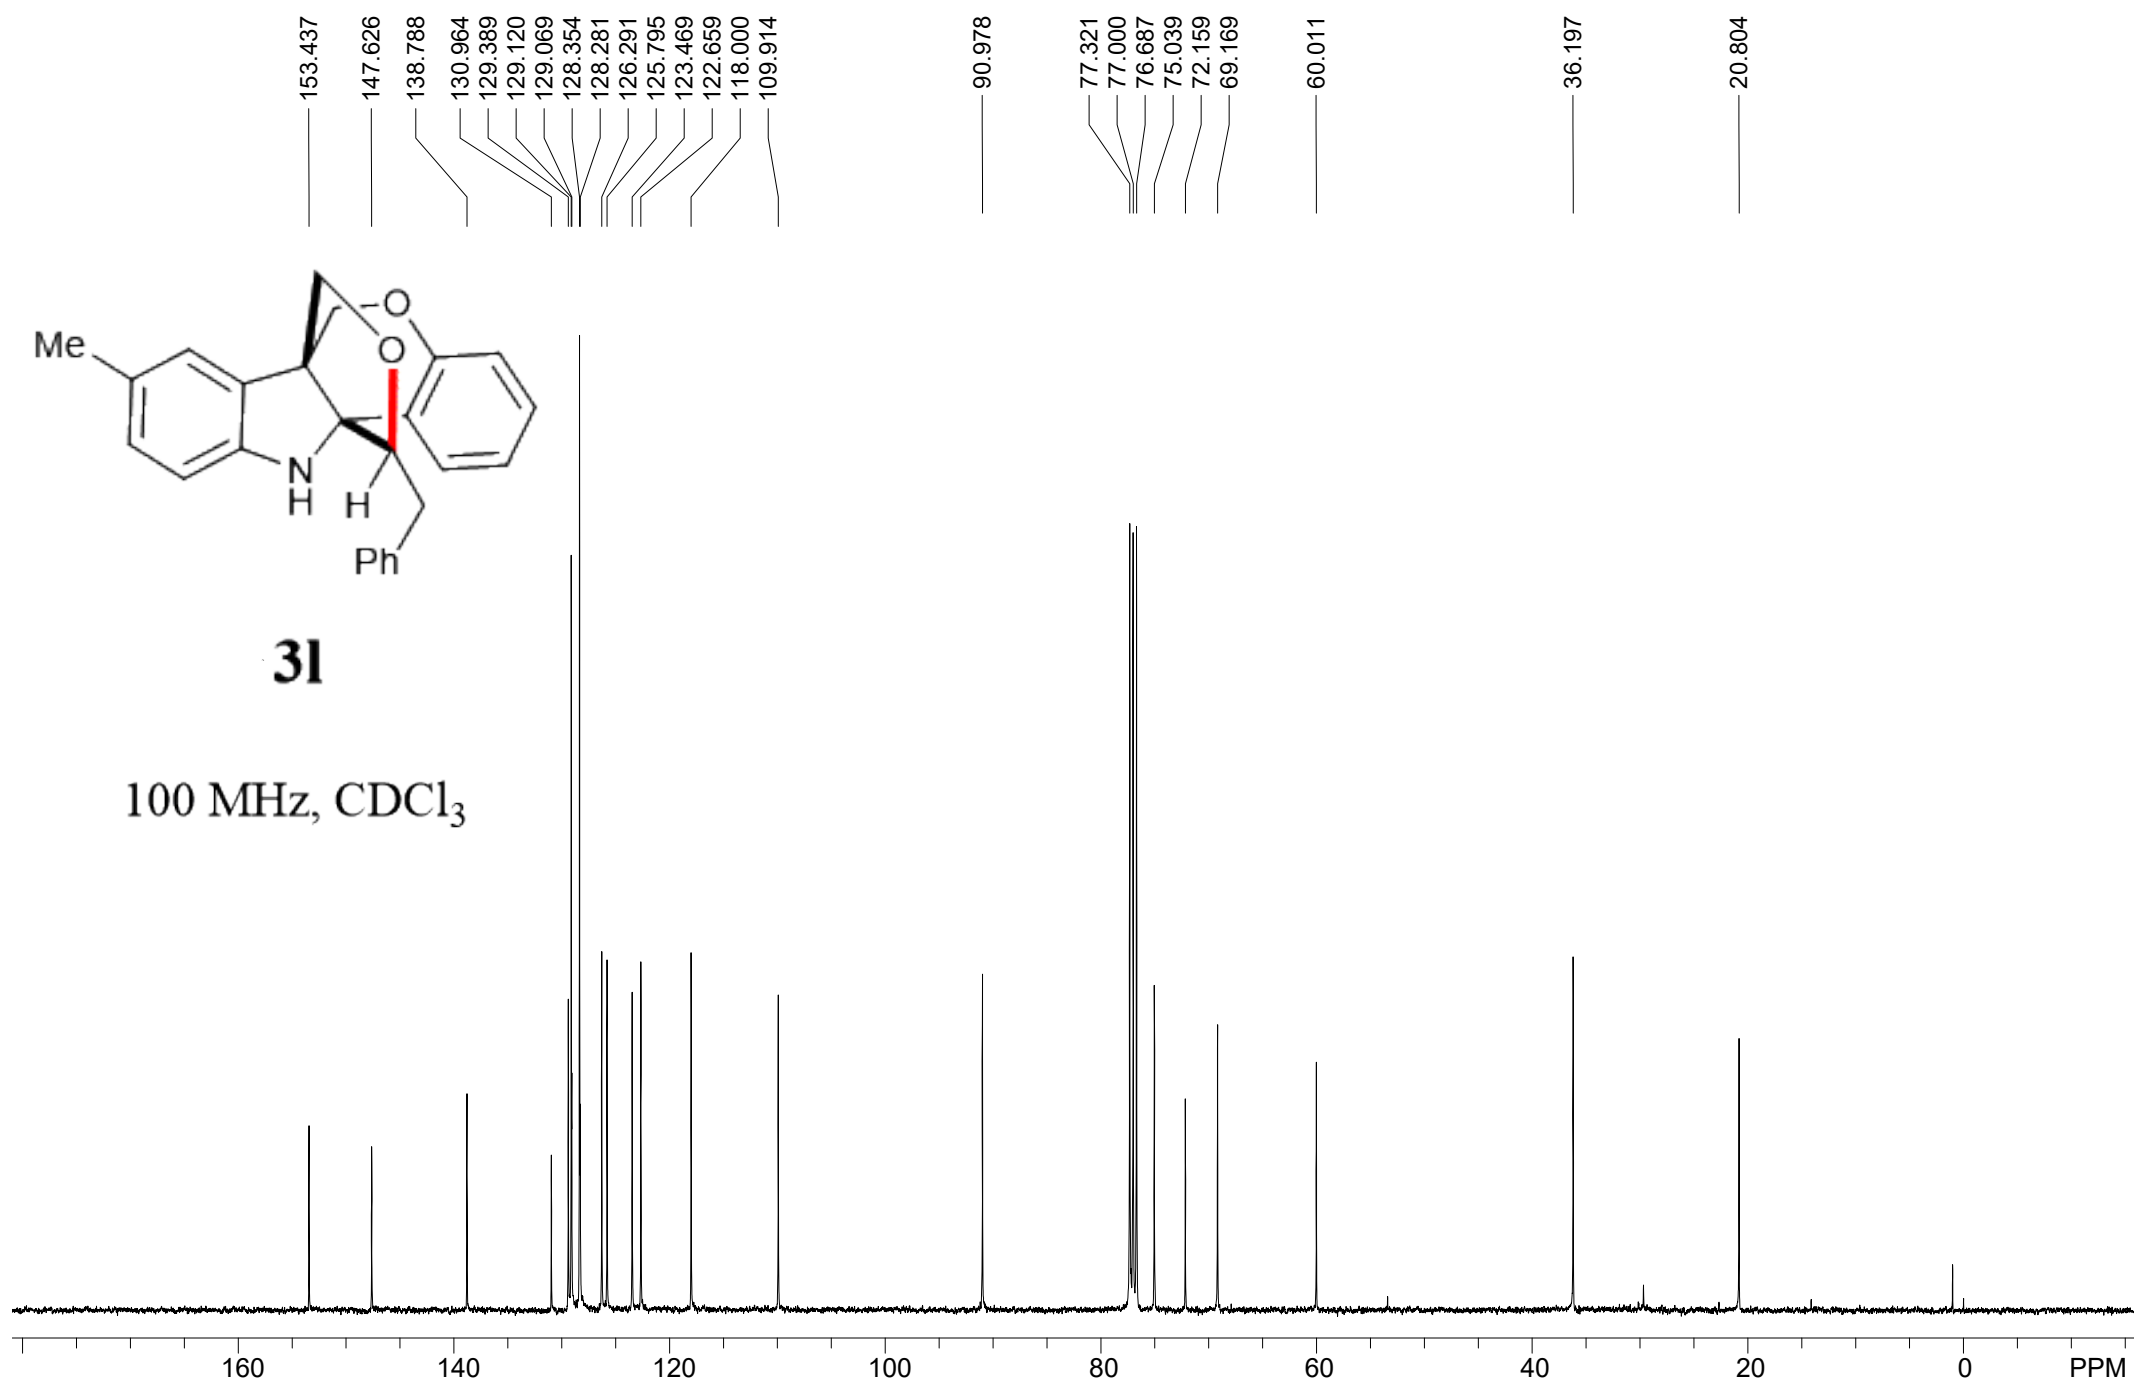

7.273  
7.255  
7.238  
7.205  
7.189  
7.104  
7.085  
7.052  
7.029  
7.008  
6.987  
6.974  
6.953  
6.589  
6.569

4.321  
4.276  
4.247  
4.188  
4.166  
4.024  
4.002  
3.891  
3.862  
3.817  
3.801  
3.787  
3.106  
3.091

0.000

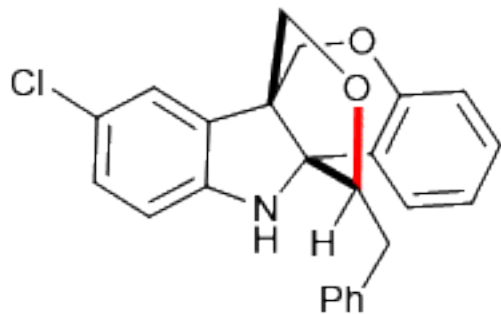

**3m**

400 MHz, CDCl<sub>3</sub>

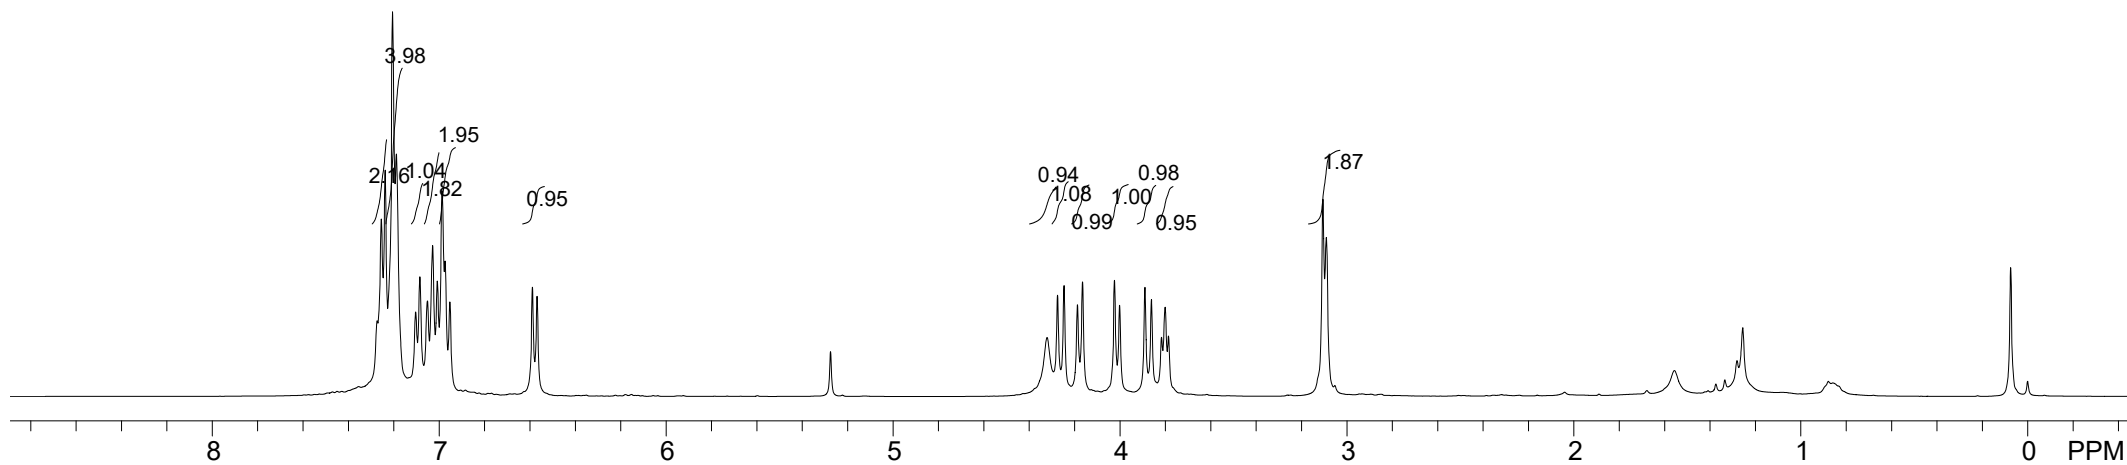

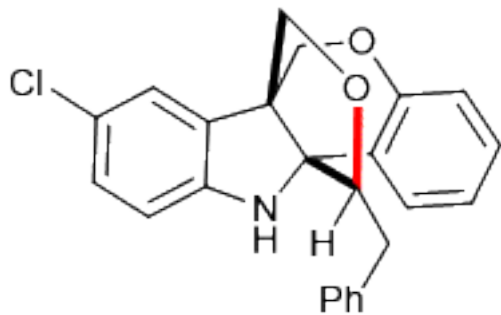

**3m**

100 MHz, CDCl<sub>3</sub>

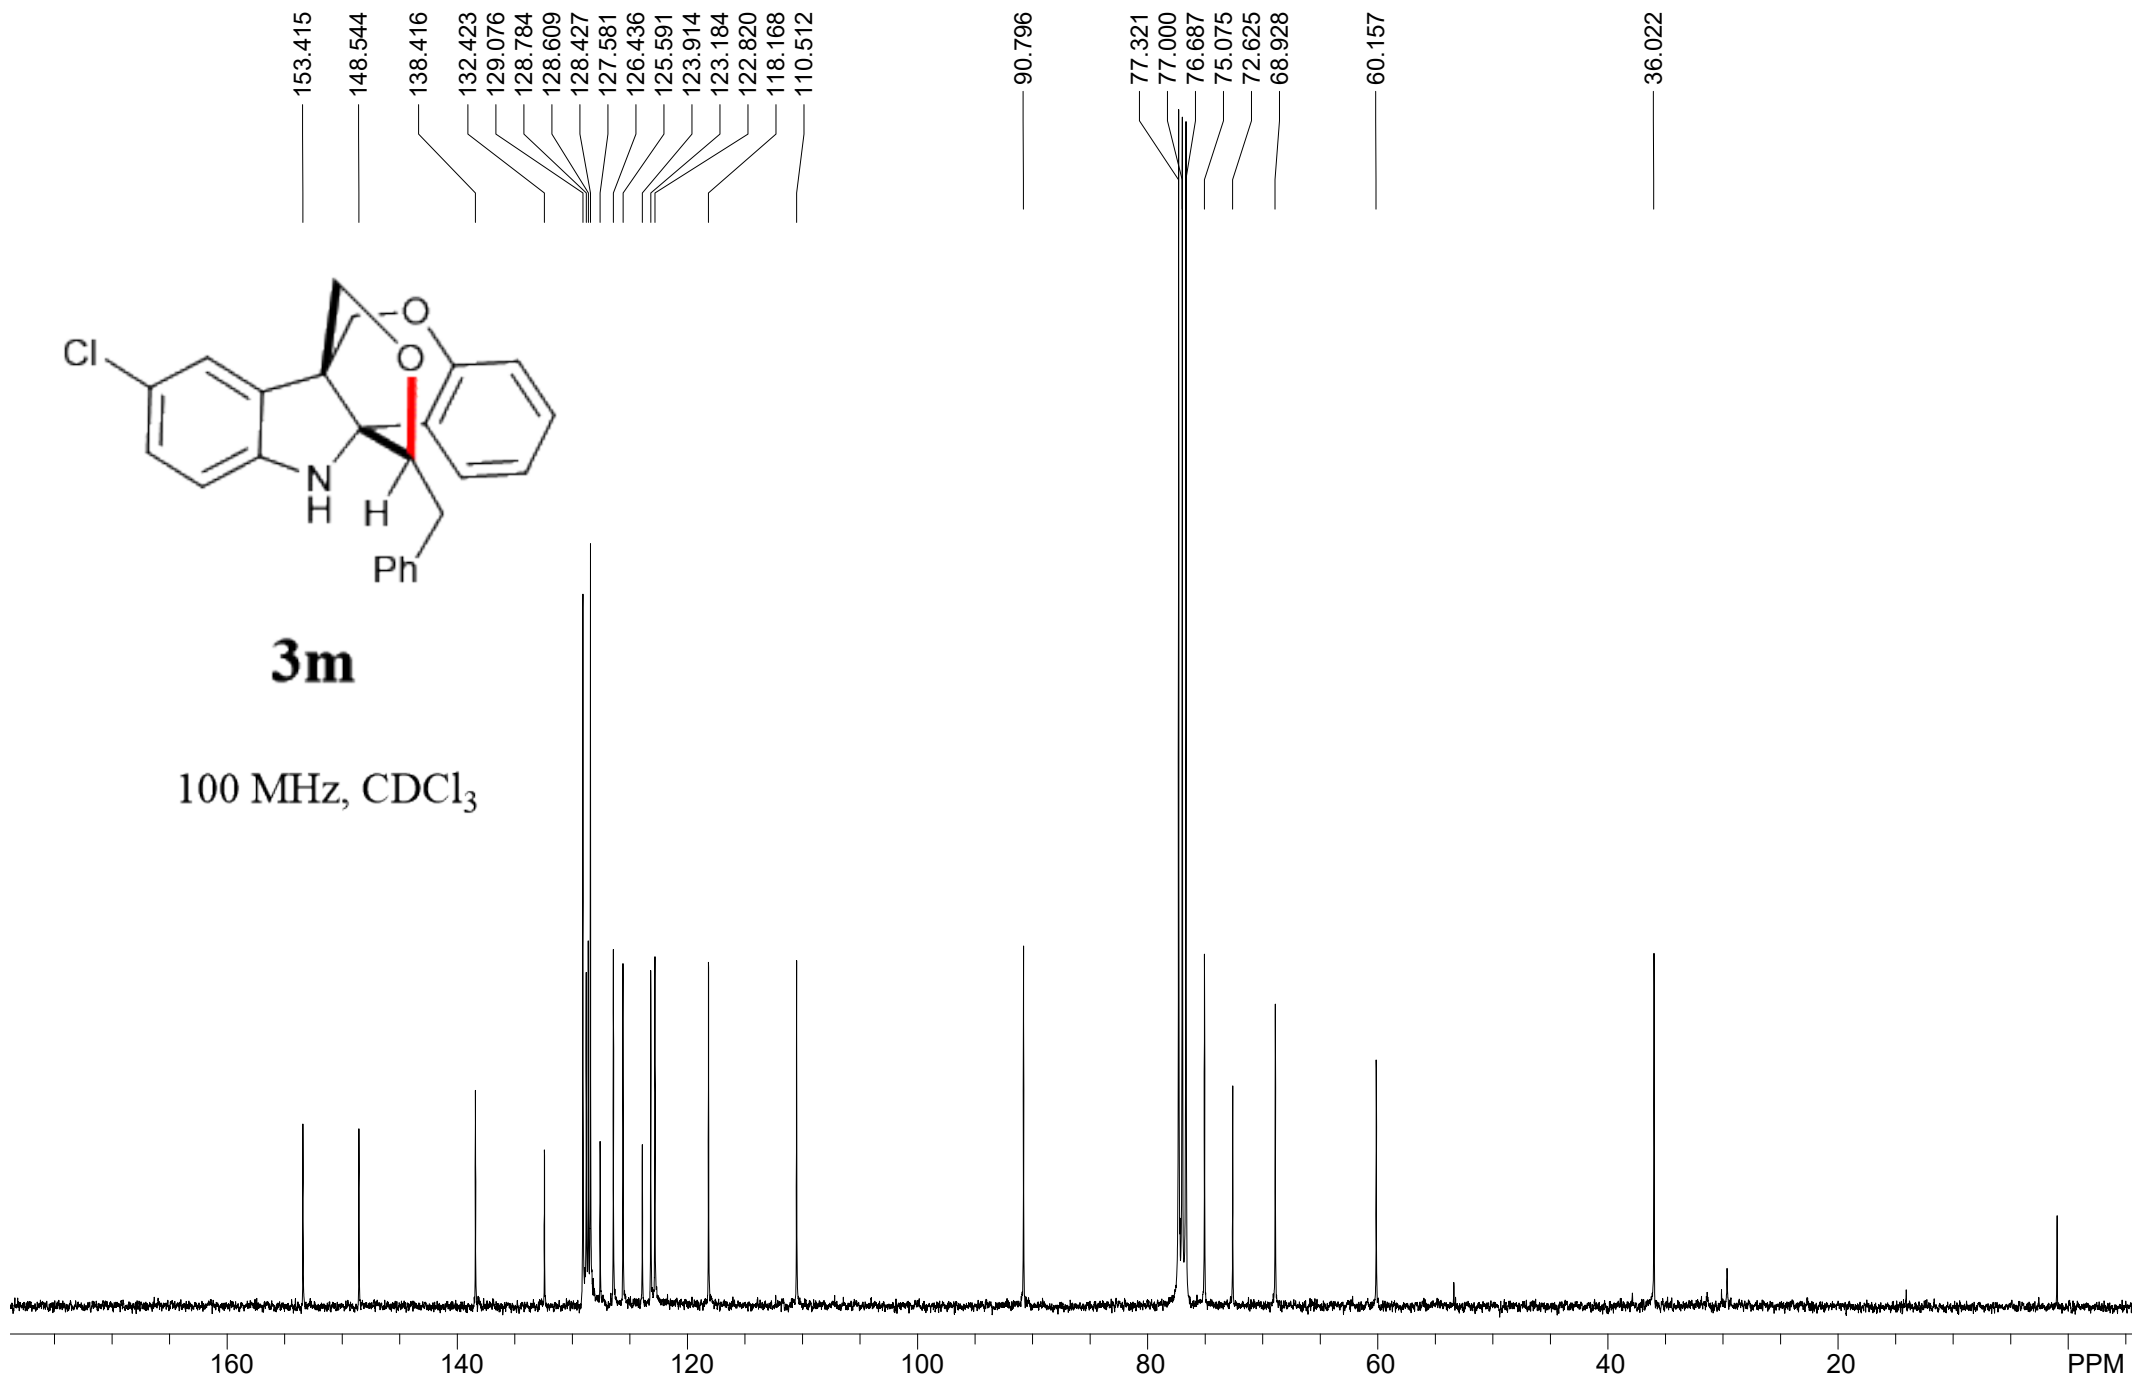

7.274  
7.256  
7.238  
7.212  
7.138  
7.120  
7.032  
7.014  
6.995  
6.973  
6.953  
6.820  
6.798  
6.772  
6.751  
6.618  
6.607  
6.597  
6.586

4.280  
4.252  
4.191  
4.169  
4.026  
4.003  
3.908  
3.880  
3.827  
3.814  
3.809  
3.796  
3.129  
3.117

0.000

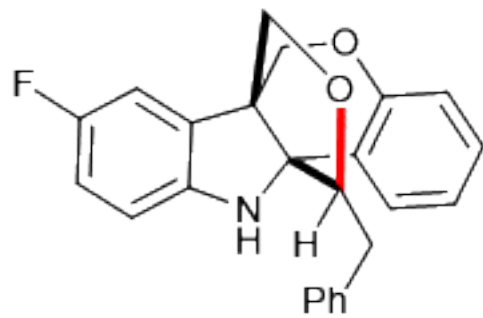

**3n**

400 MHz, CDCl<sub>3</sub>

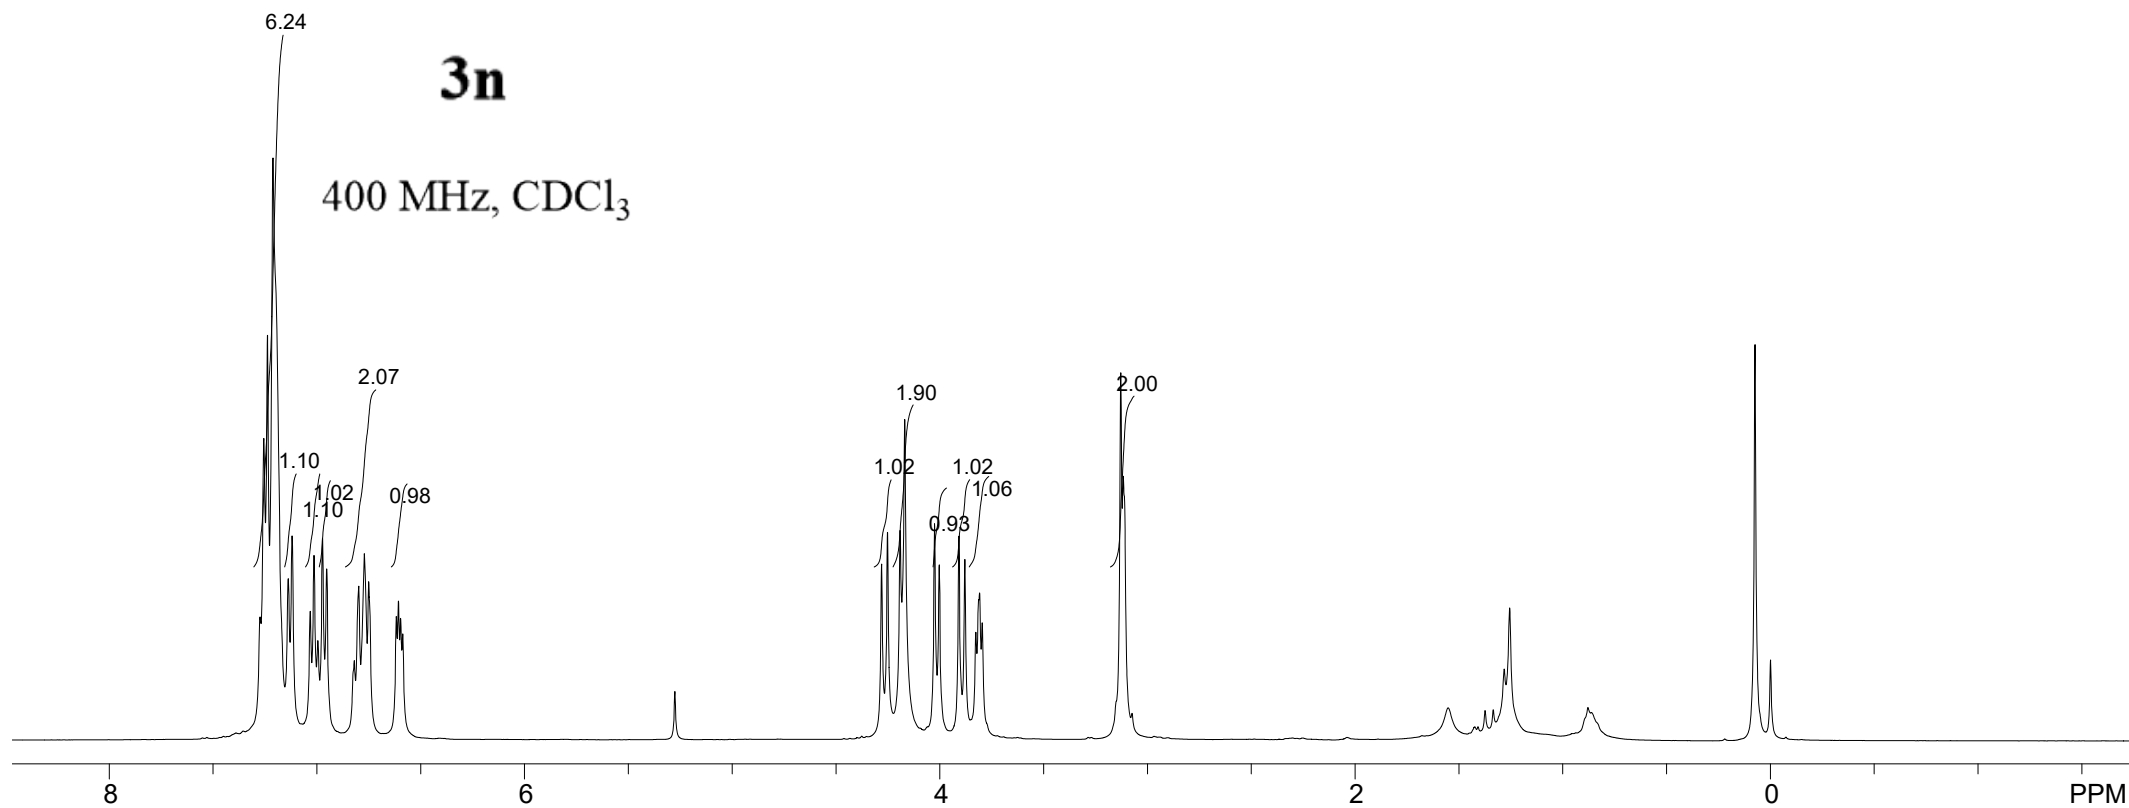

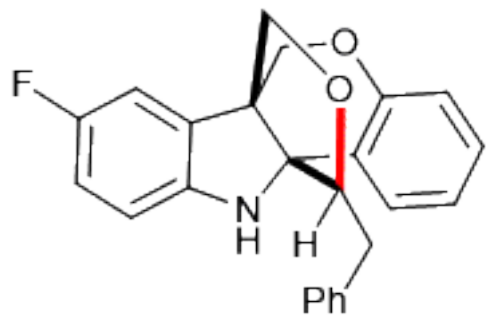

**3n**

100 MHz, CDCl<sub>3</sub>

158.665  
156.310  
153.408  
146.000  
138.584  
132.277  
132.204  
129.091  
128.566  
128.398  
127.851  
126.378  
125.649  
122.827  
118.110  
115.324  
115.098  
110.577  
110.497  
110.330  
110.089

90.920

77.212  
77.000  
76.687  
75.017  
72.778  
68.907

60.303

36.066

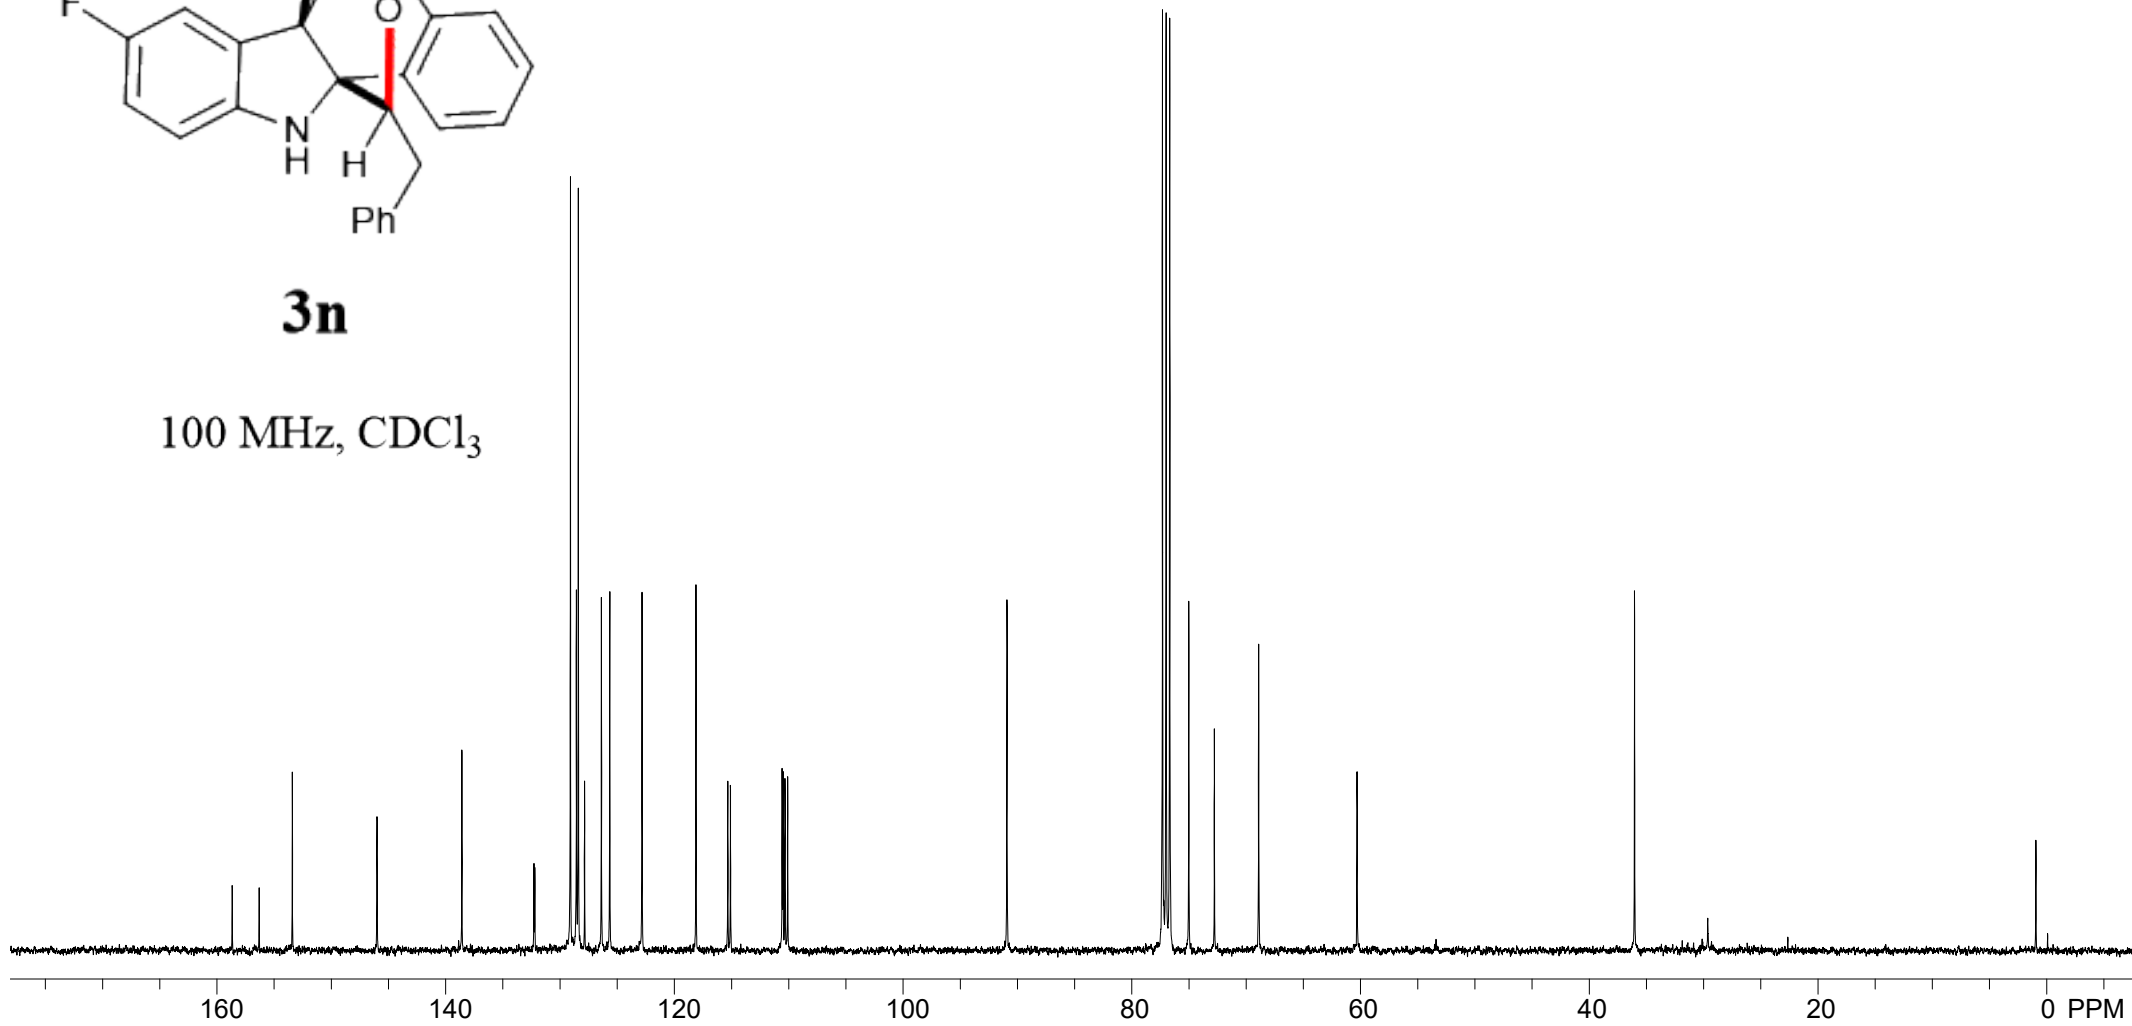



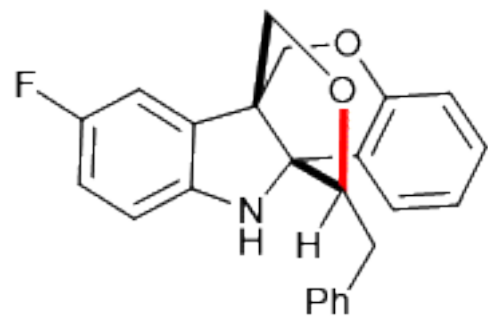

**3n**

376 MHz, CDCl<sub>3</sub>

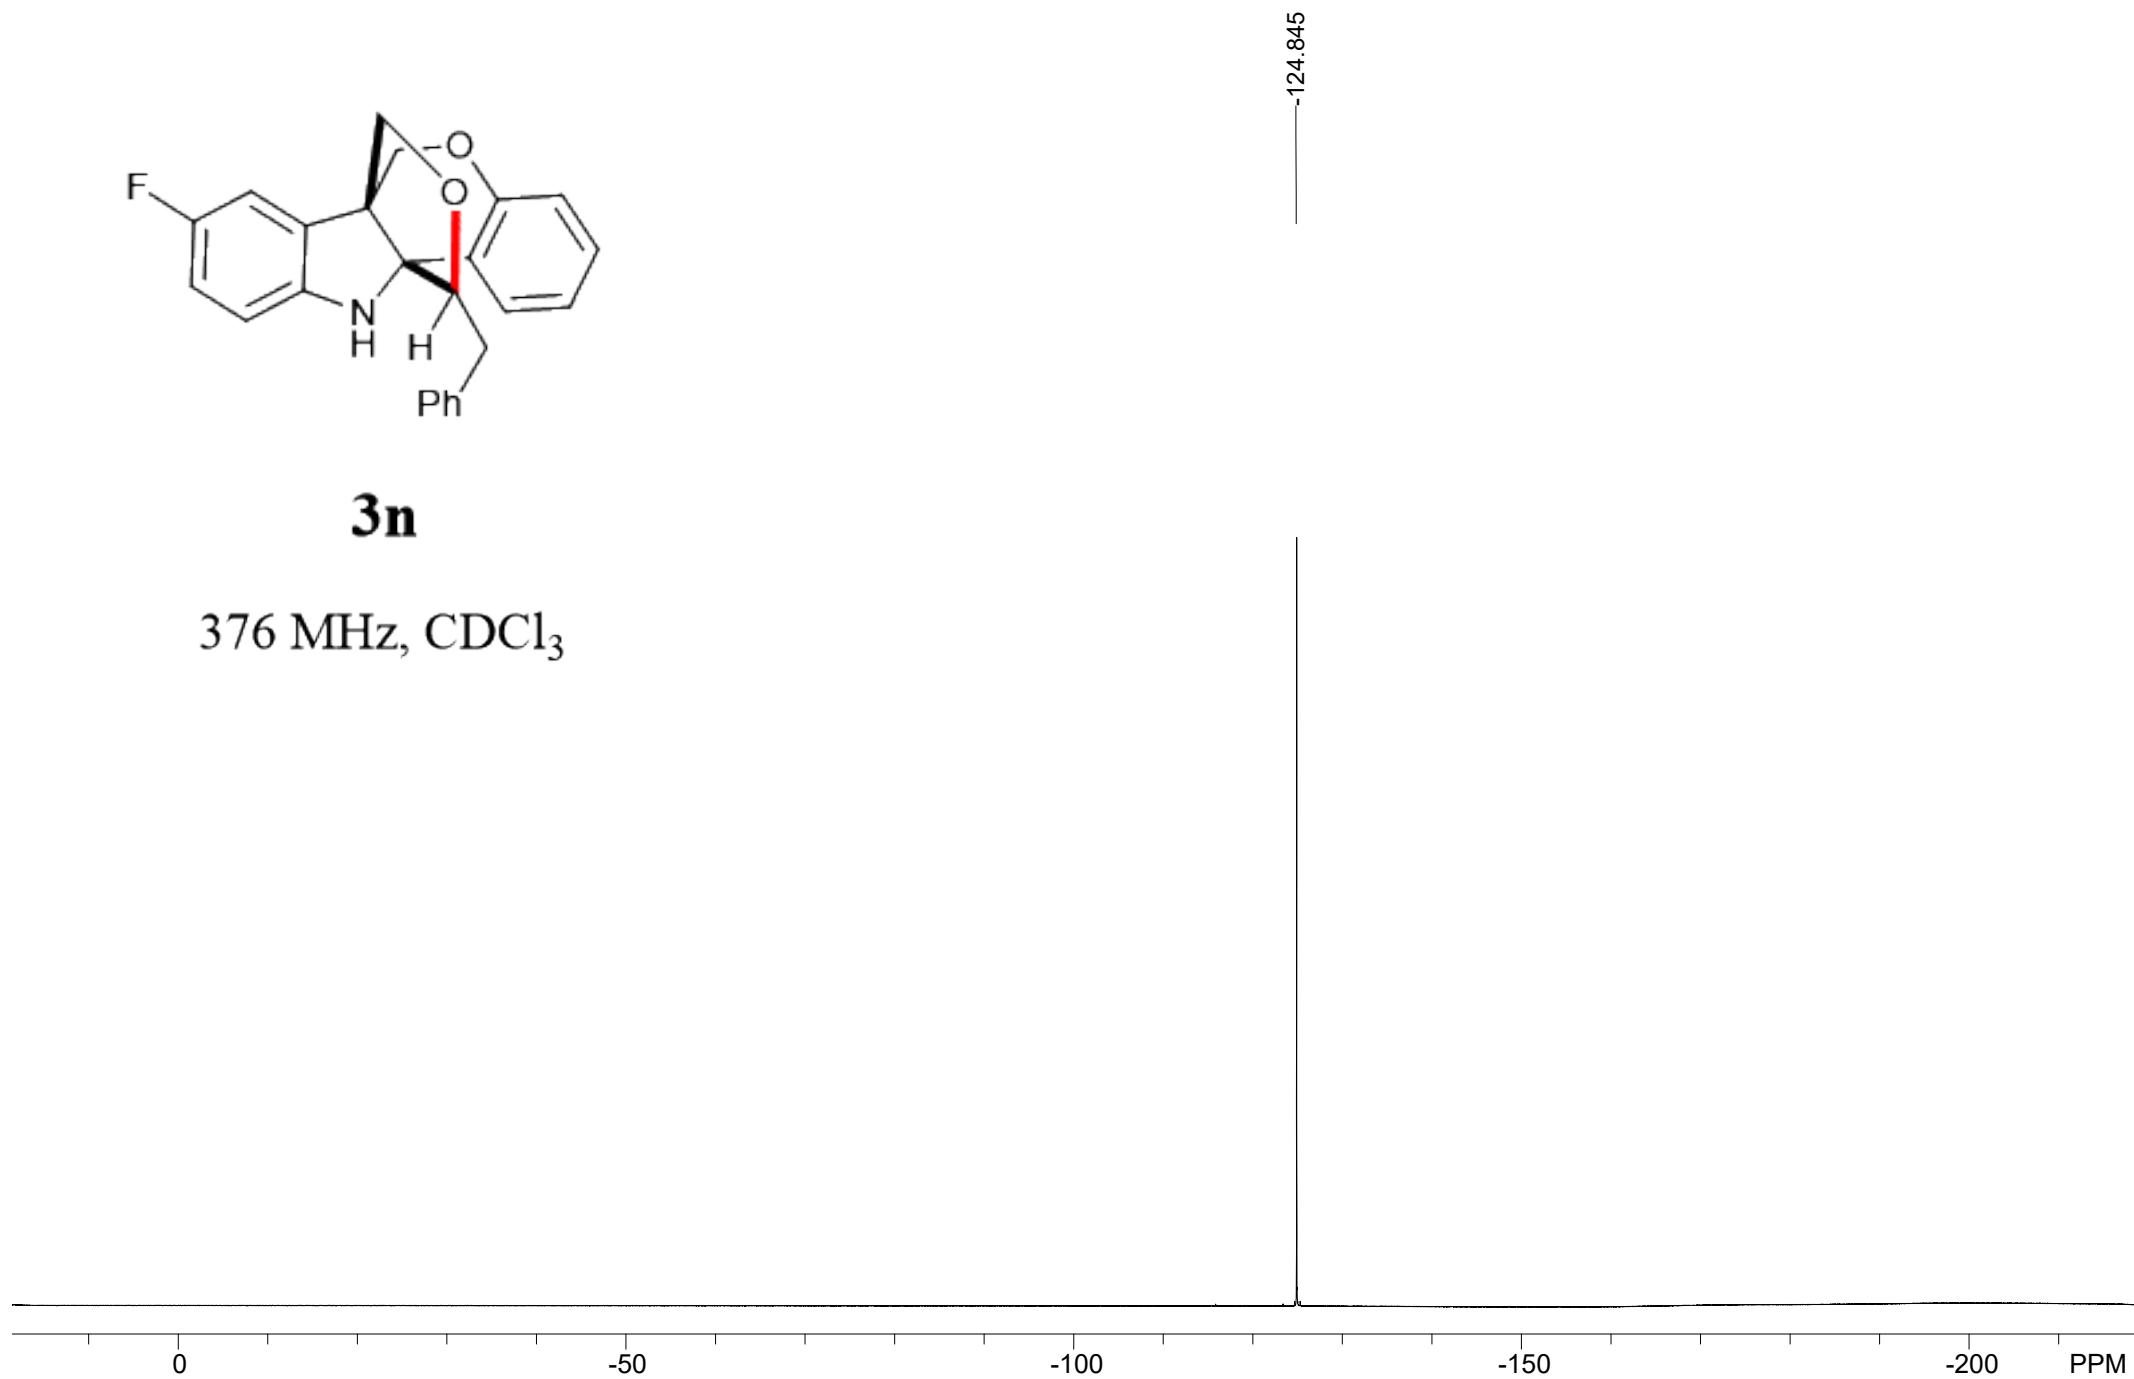

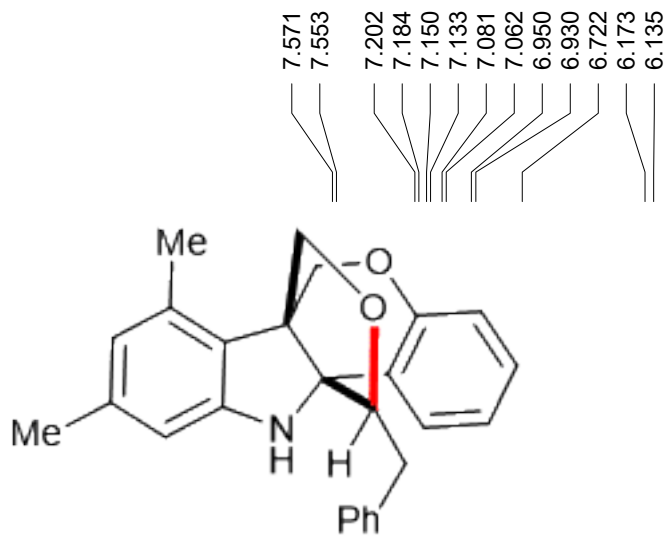

**30**

400 MHz, DMSO- $d_6$

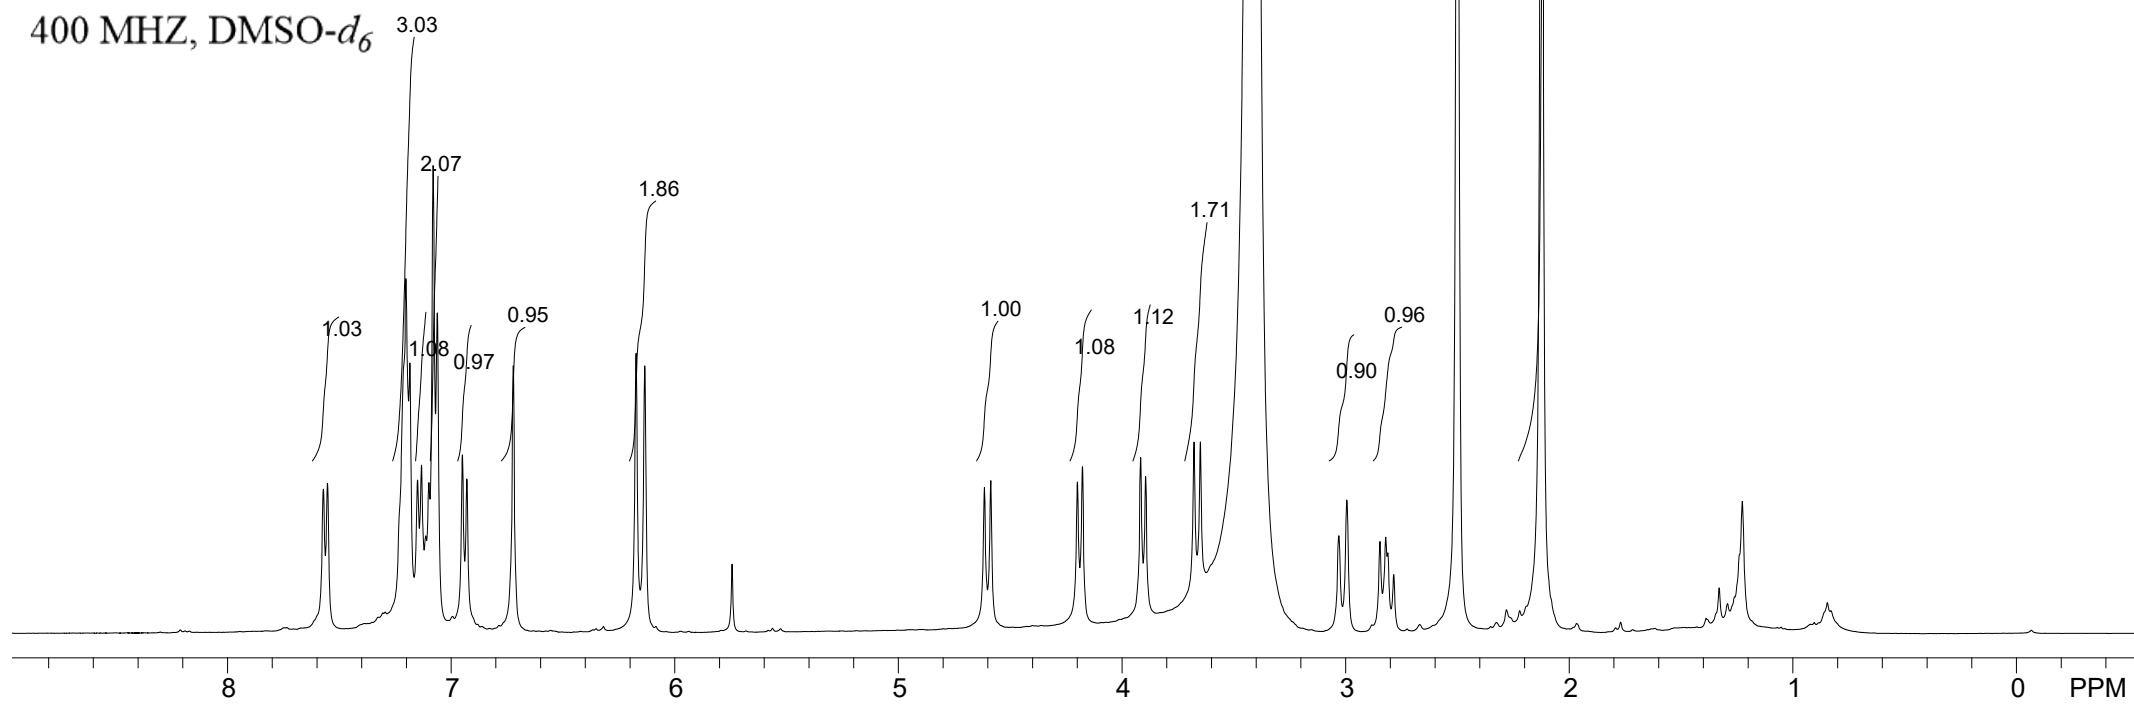

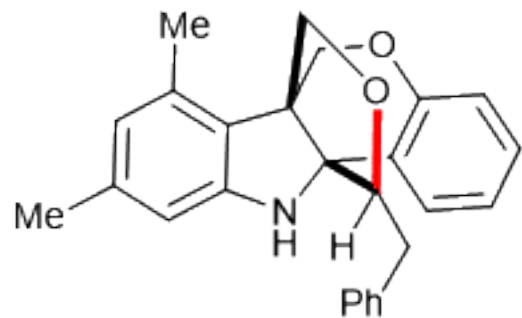

**30**

100 MHz, DMSO-*d*<sub>6</sub>

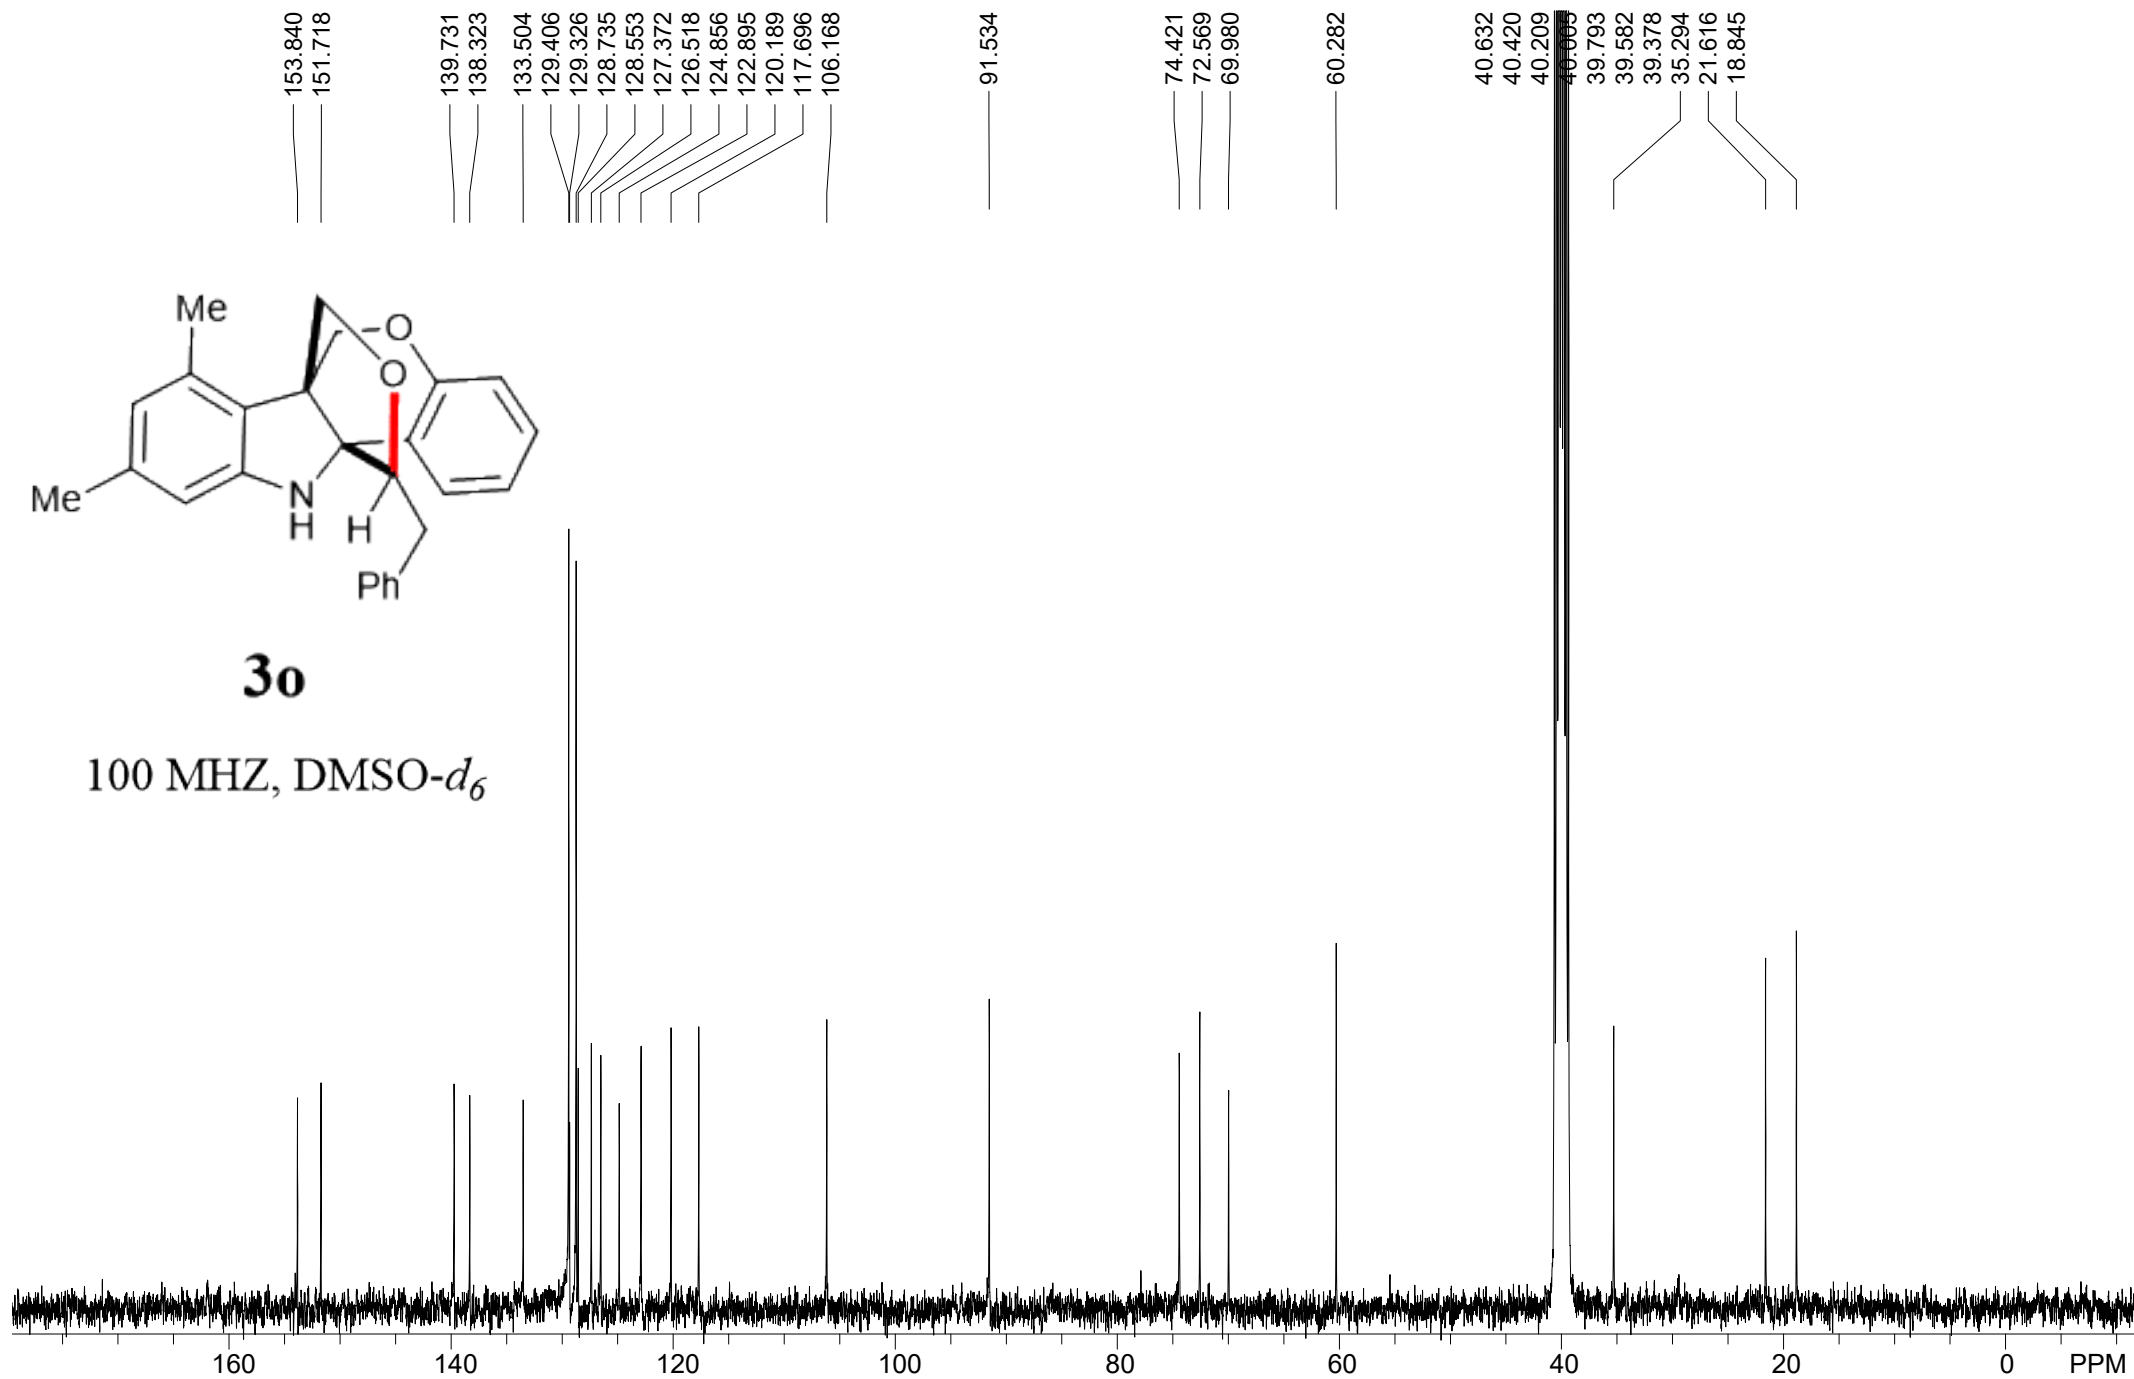

7.379  
7.295  
7.277  
7.260  
7.235  
7.216  
7.056  
7.008  
6.998  
6.977  
6.957

4.549  
4.268  
4.240  
4.190  
4.167  
4.043  
4.021  
3.878  
3.850  
3.833  
3.817  
3.801  
3.124  
3.108

-0.000

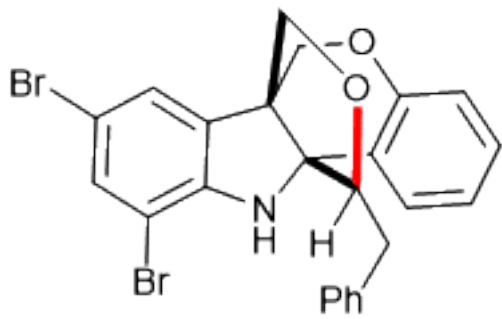

400 MHz, CDCl<sub>3</sub>

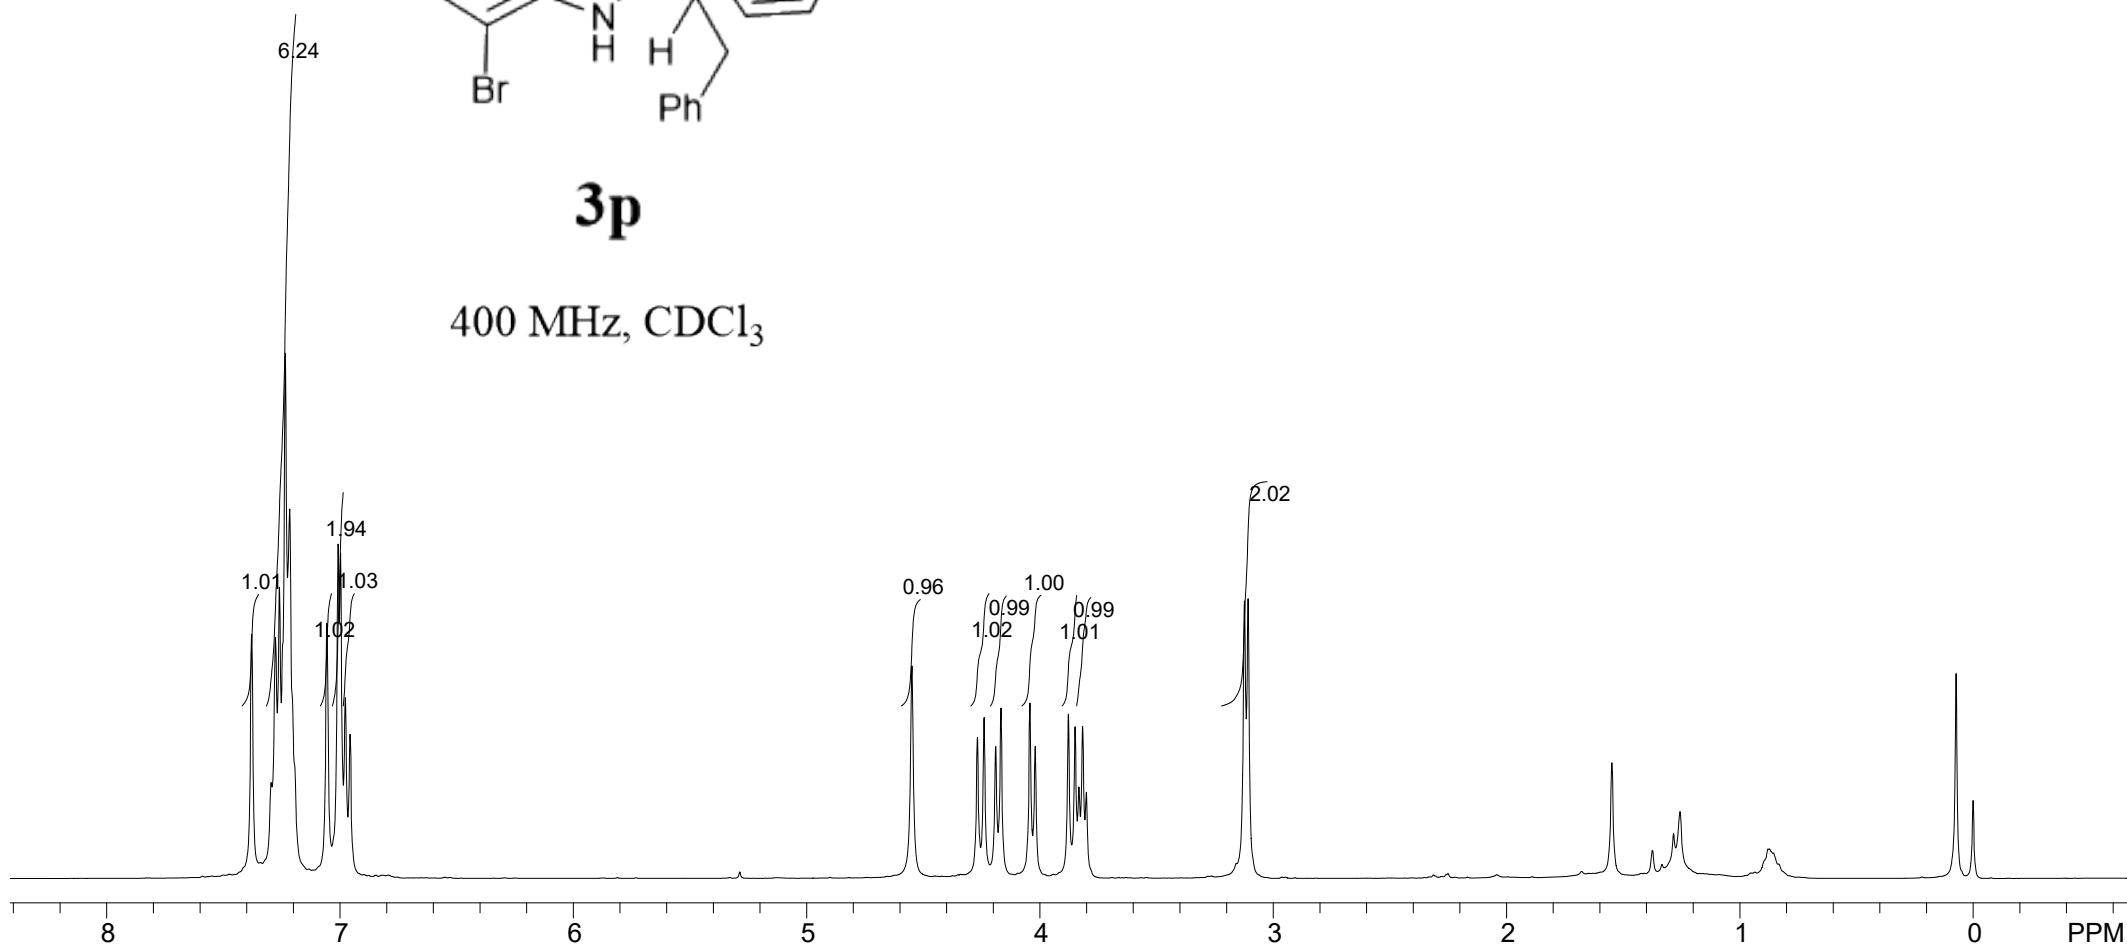

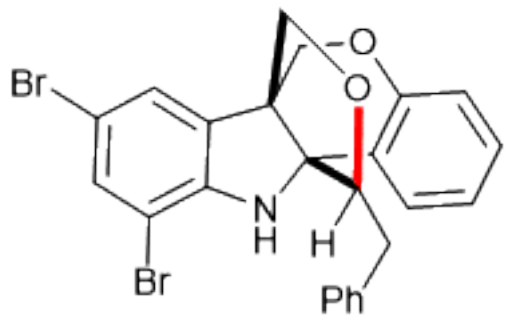

**3p**

100 MHz, CDCl<sub>3</sub>

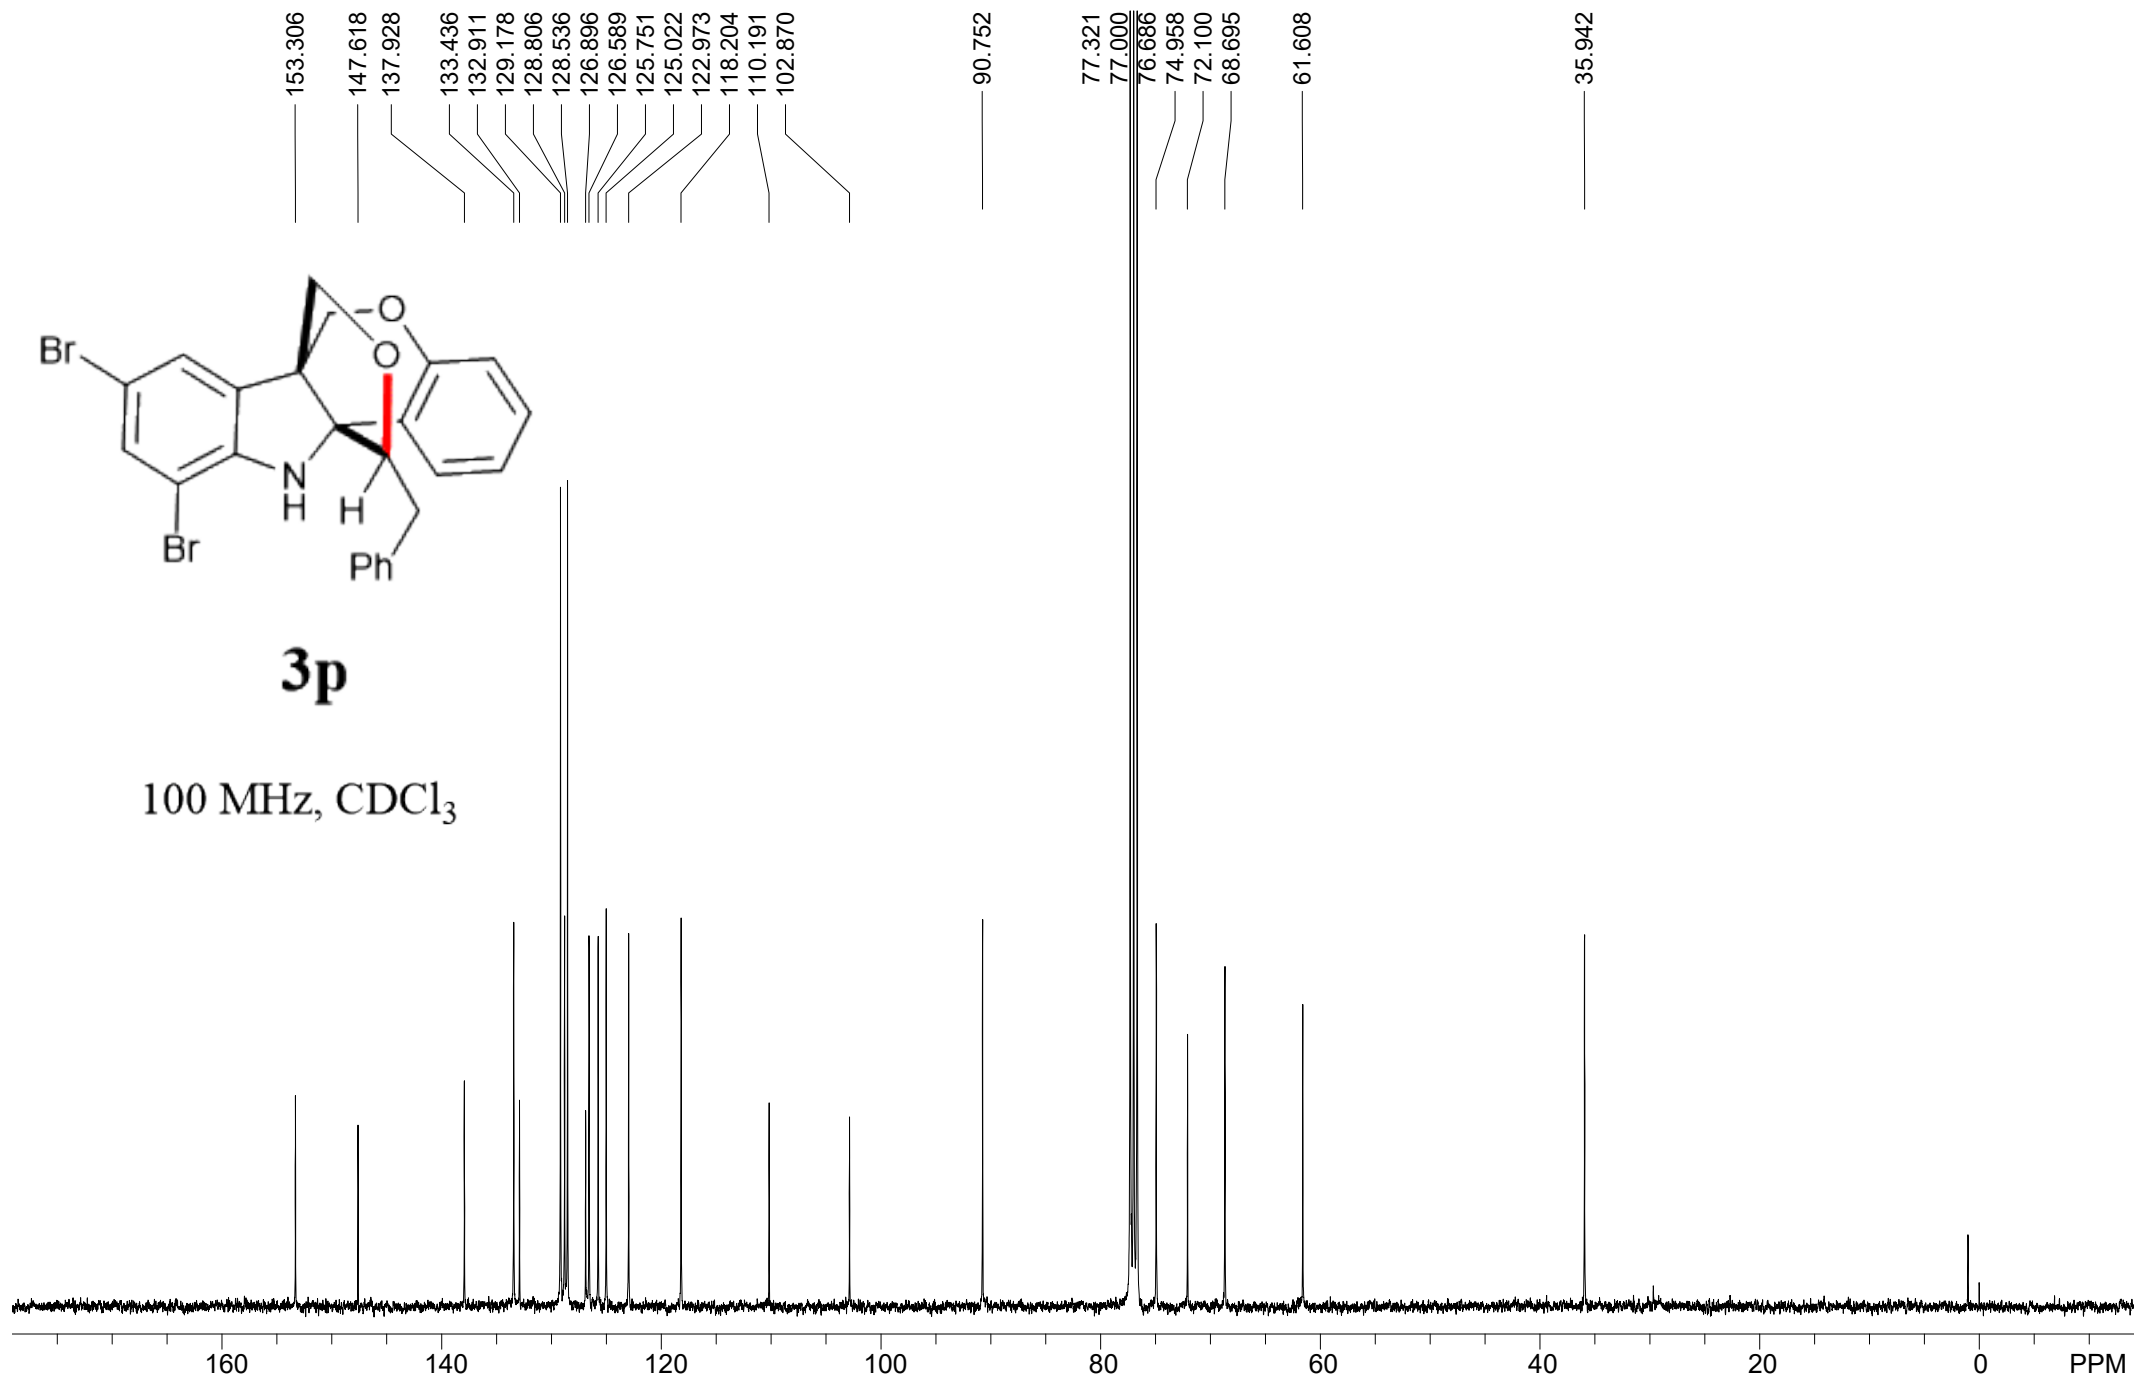

7.278  
7.259  
7.240  
7.226  
7.209  
7.190  
7.172  
7.155  
7.136  
7.023  
7.004  
6.986  
6.966  
6.947  
6.930  
6.905  
6.887  
6.746  
6.728  
6.709

4.318  
4.290  
4.219  
4.197  
4.063  
4.040  
4.026  
3.897  
3.868  
3.836  
3.825  
3.817  
3.805  
3.171  
3.146  
3.137  
3.125

2.192

-0.000

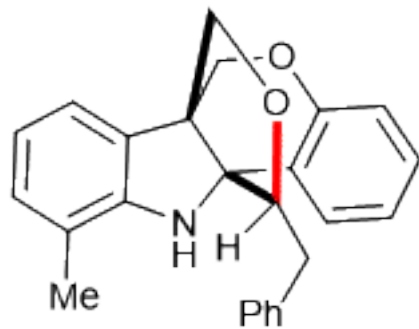

**3q**

400 MHz, CDCl<sub>3</sub>

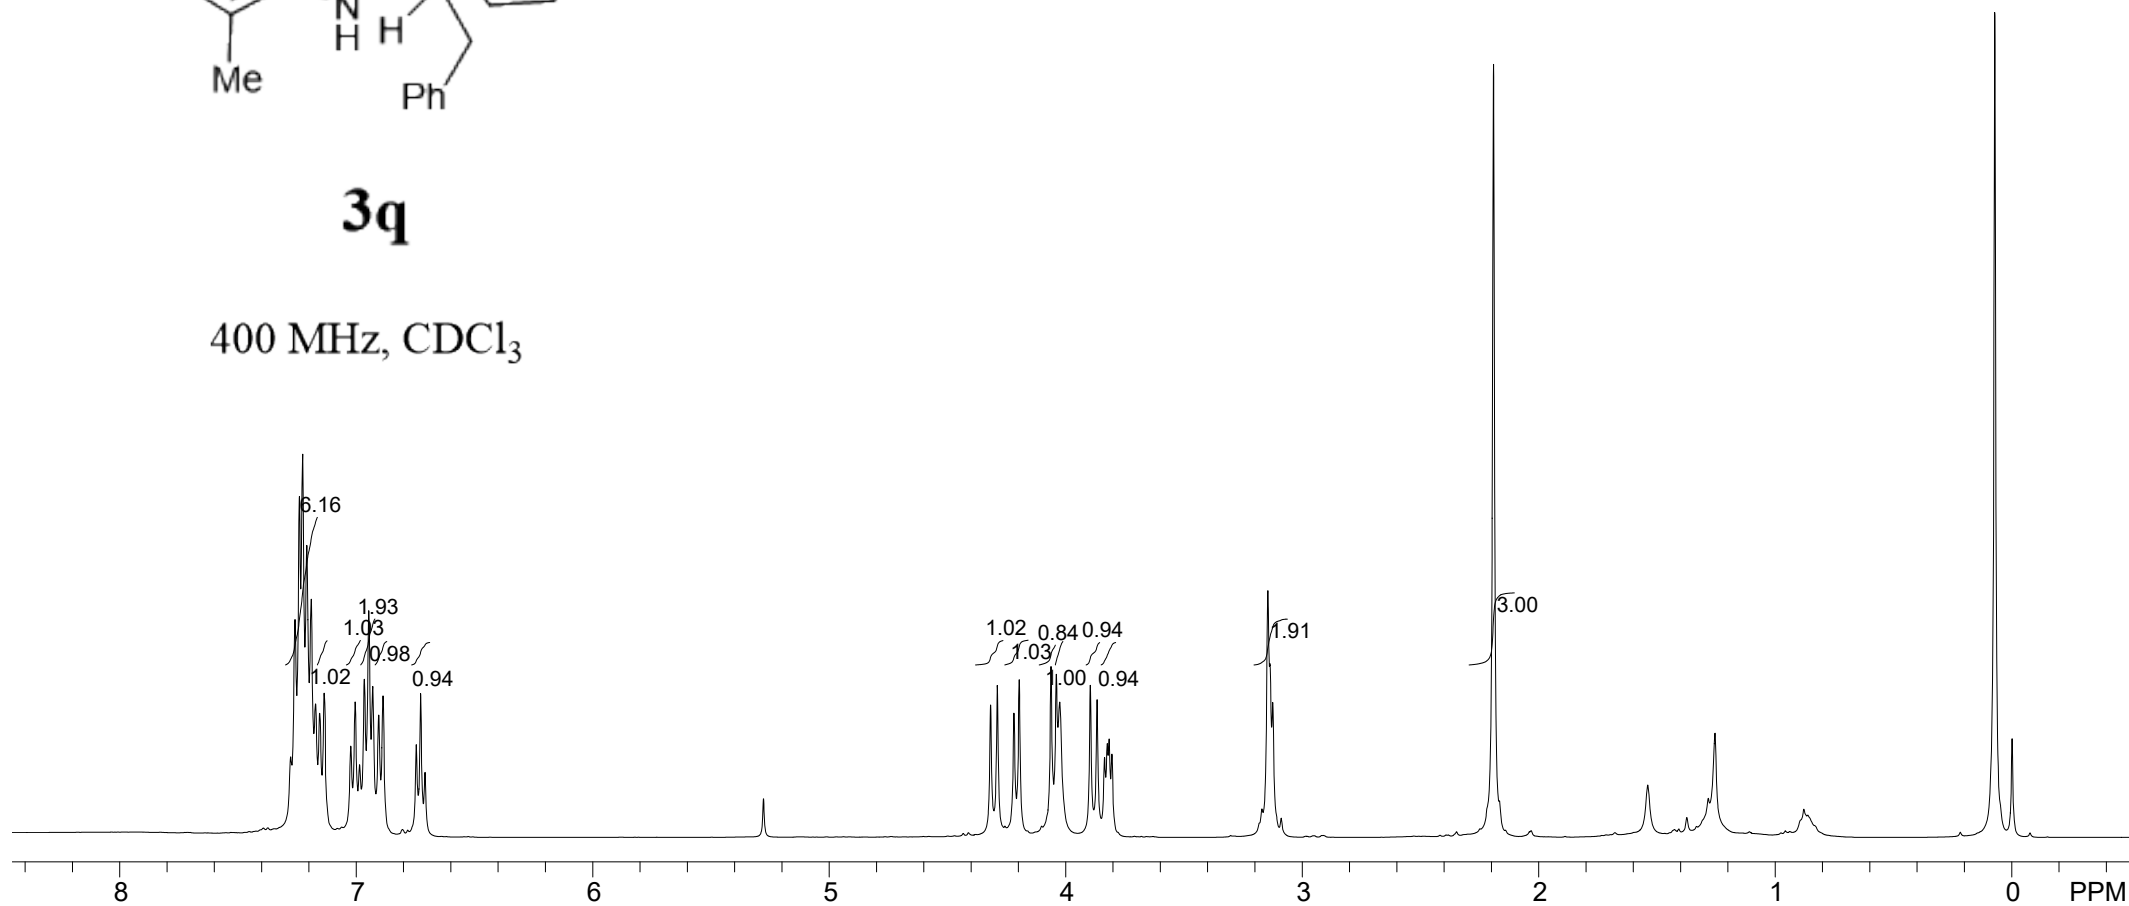

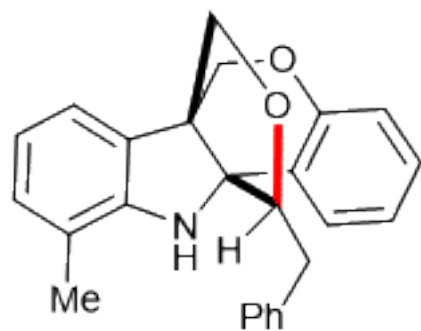

**3q**

100 MHz, CDCl<sub>3</sub>

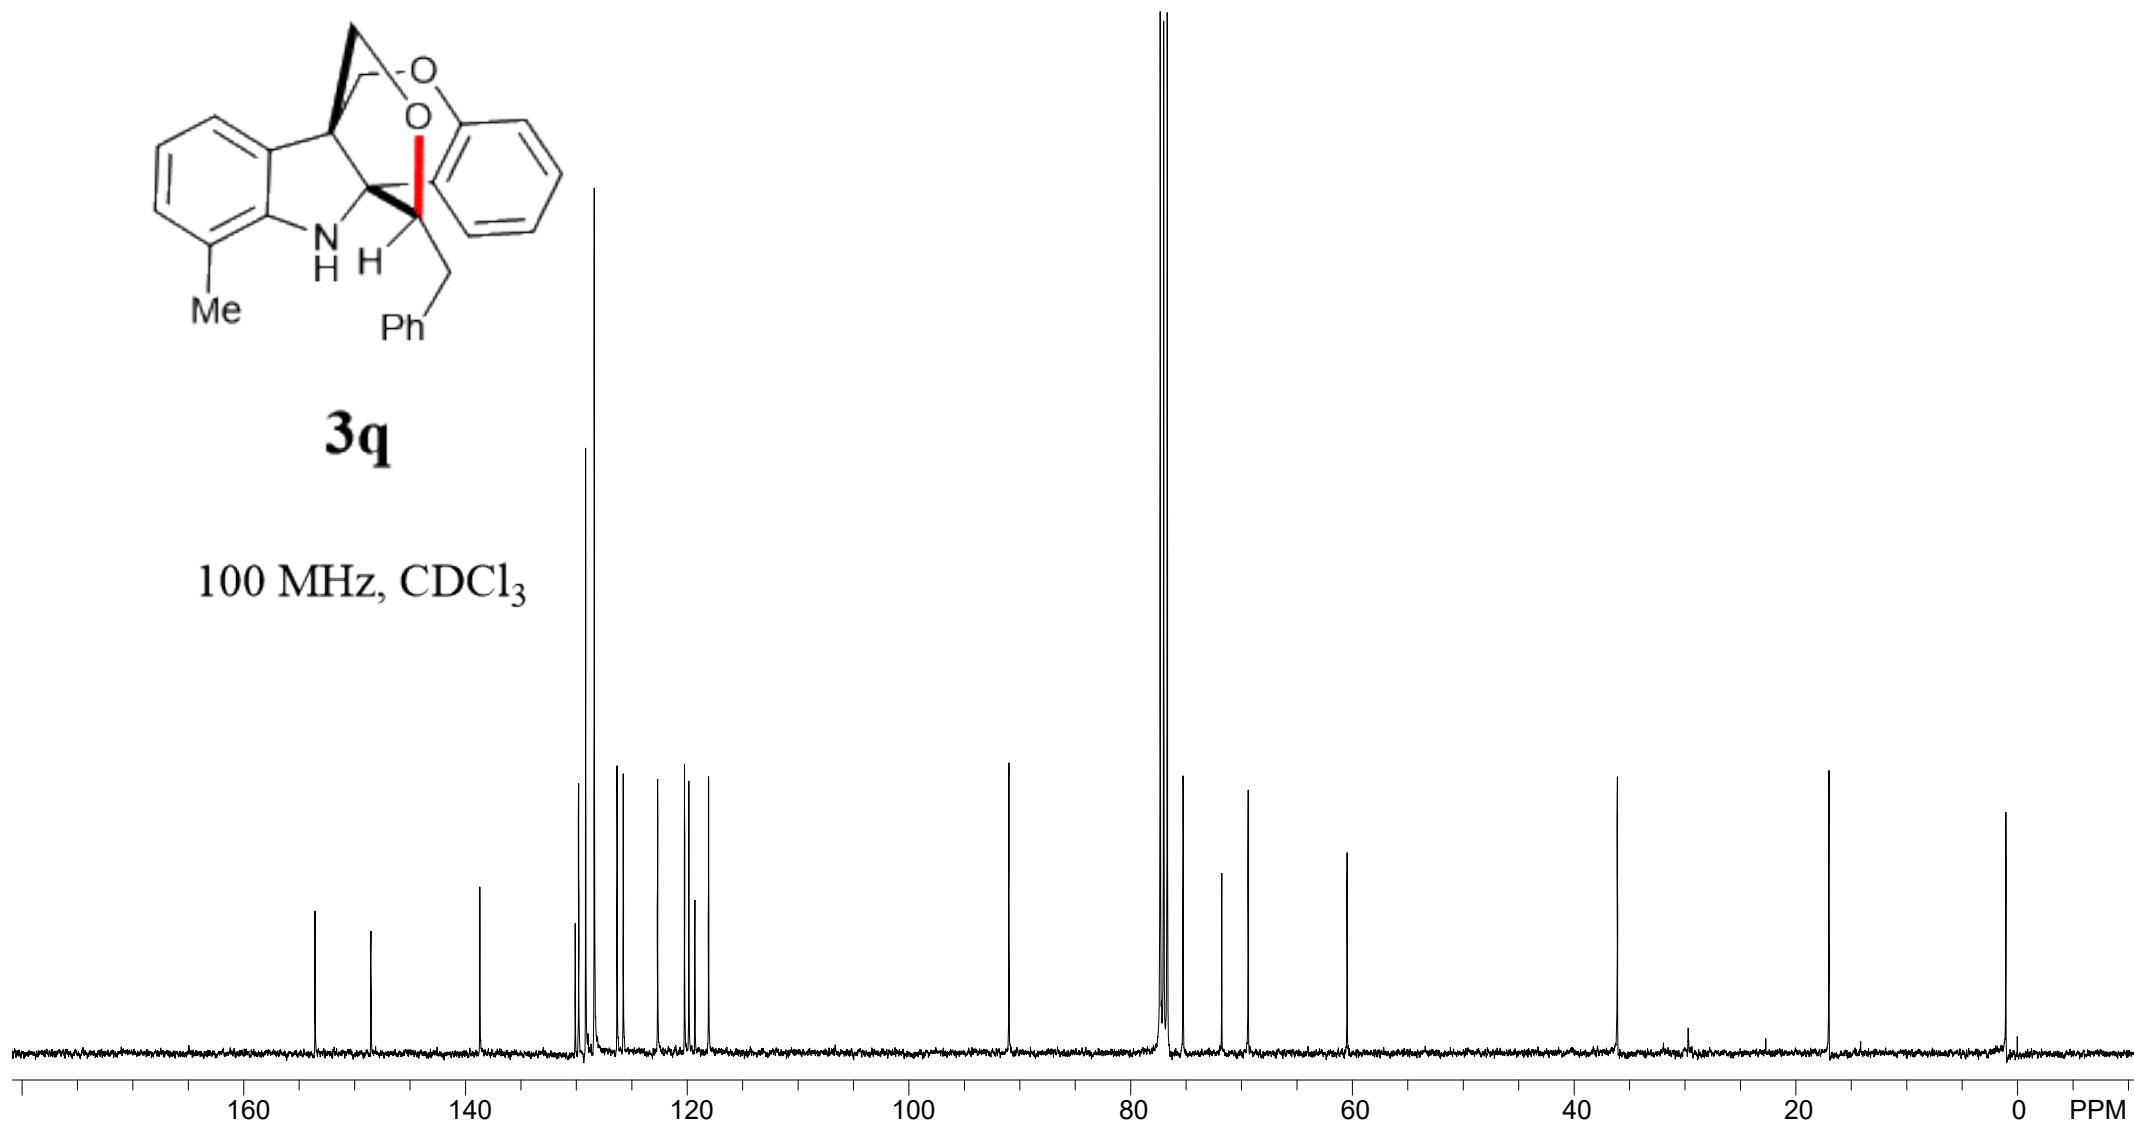

7.294  
7.276  
7.248  
7.231  
7.207  
7.186  
7.040  
7.021  
6.996  
6.968  
6.946  
6.648  
6.629  
6.610

4.559  
4.305  
4.277  
4.215  
4.192  
4.071  
4.048  
3.894  
3.866  
3.844  
3.829  
3.812  
3.146  
3.130

-0.000

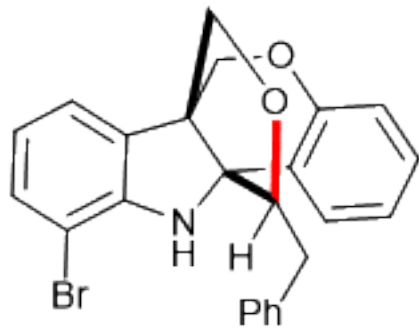

**3r**

400 MHz, CDCl<sub>3</sub>

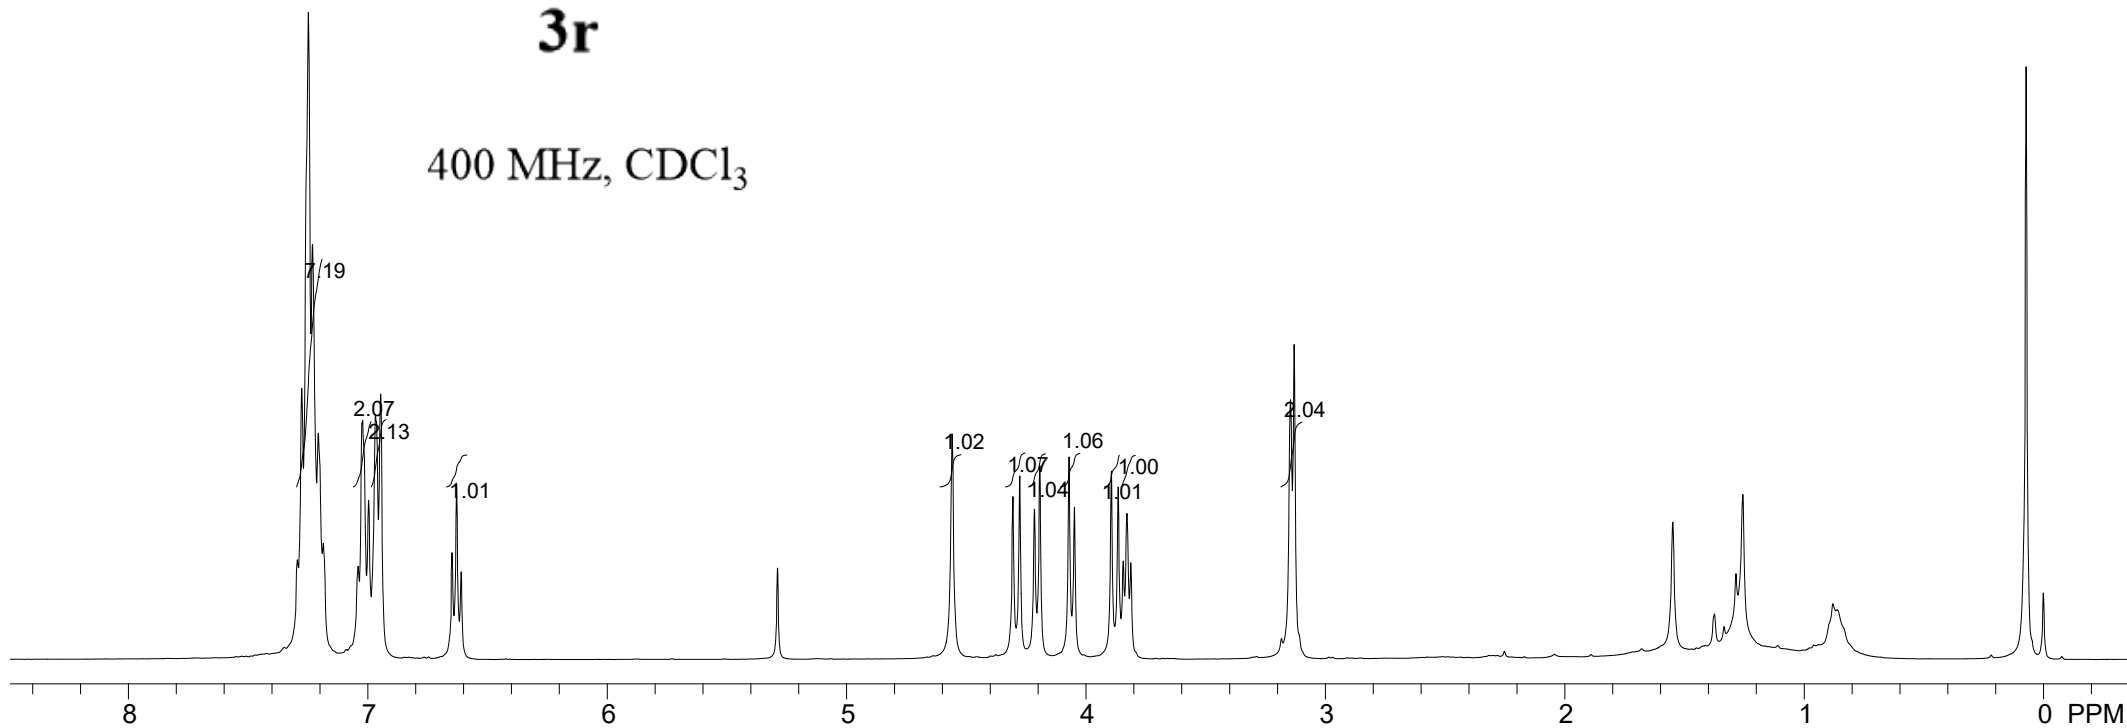



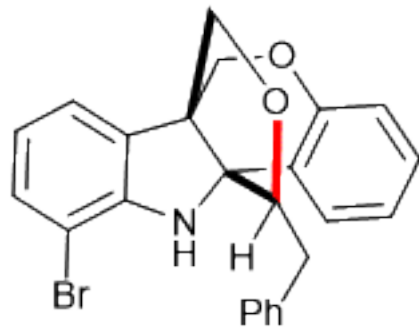

**3r**

100 MHz, CDCl<sub>3</sub>

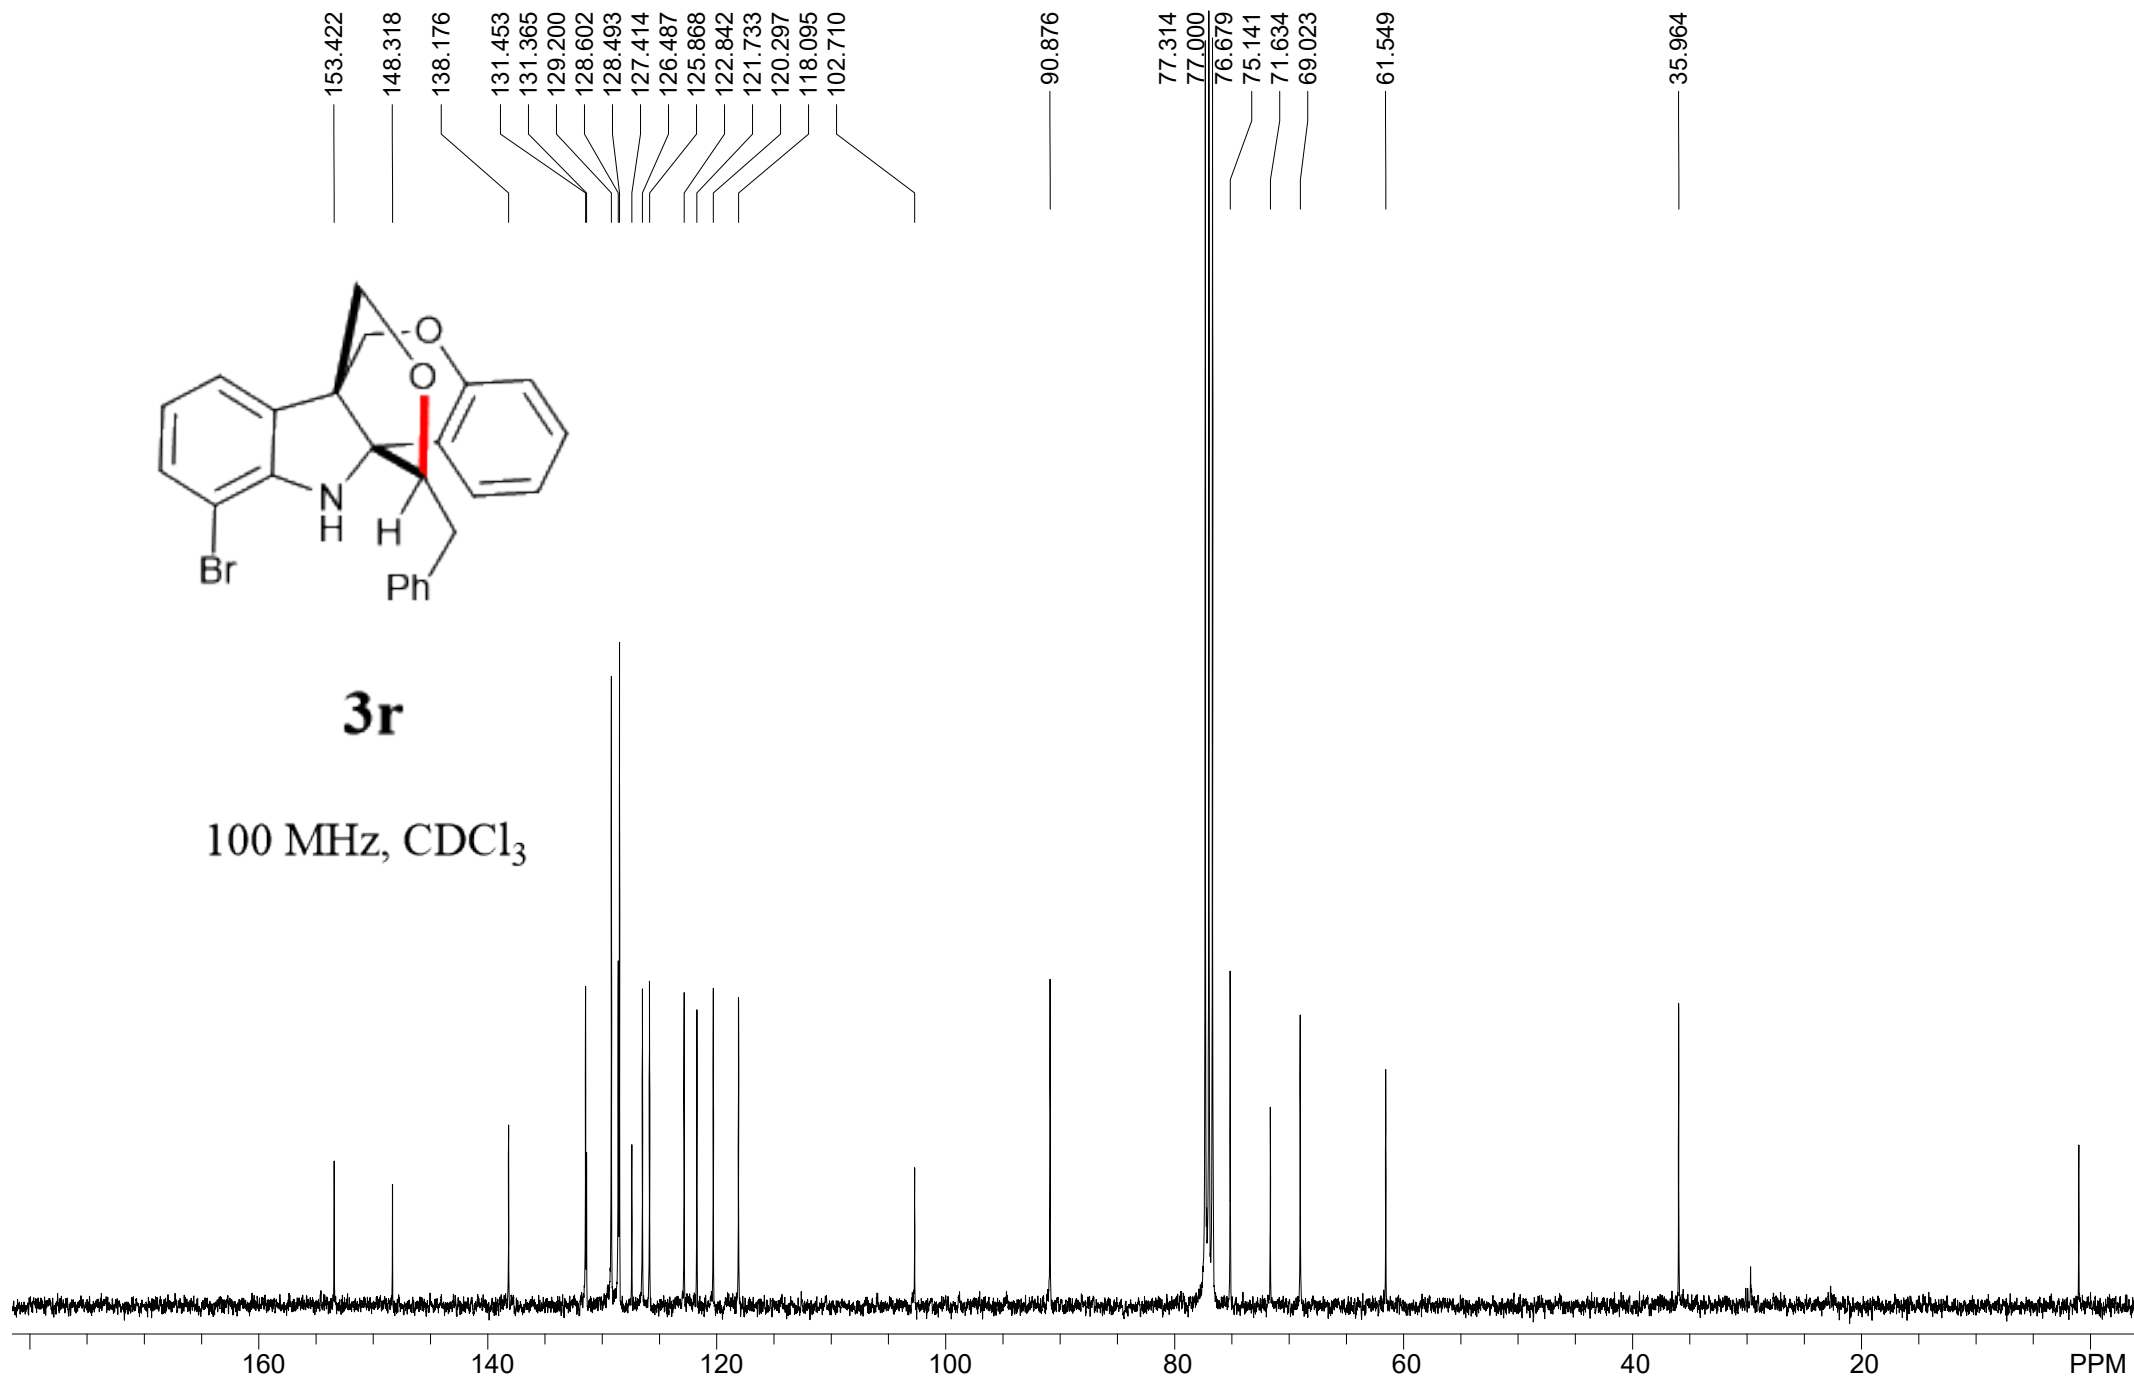

7.281  
7.264  
7.245  
7.232  
7.215  
7.187  
7.118  
7.099  
7.081  
7.033  
7.015  
6.908  
6.886  
6.789  
6.770  
6.753  
6.737  
6.732  
6.701  
6.682  
6.643

4.328  
4.286  
4.258  
4.218  
4.196  
4.061  
4.038  
3.843  
3.817  
3.728  
3.119  
3.103

0.000

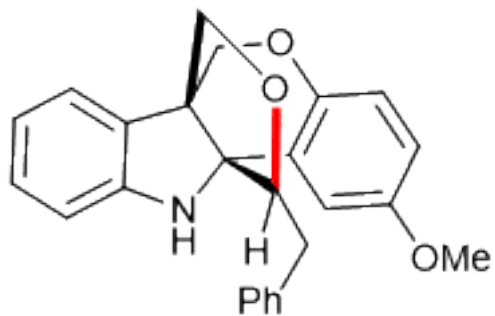

**3s**

400 MHz, CDCl<sub>3</sub>

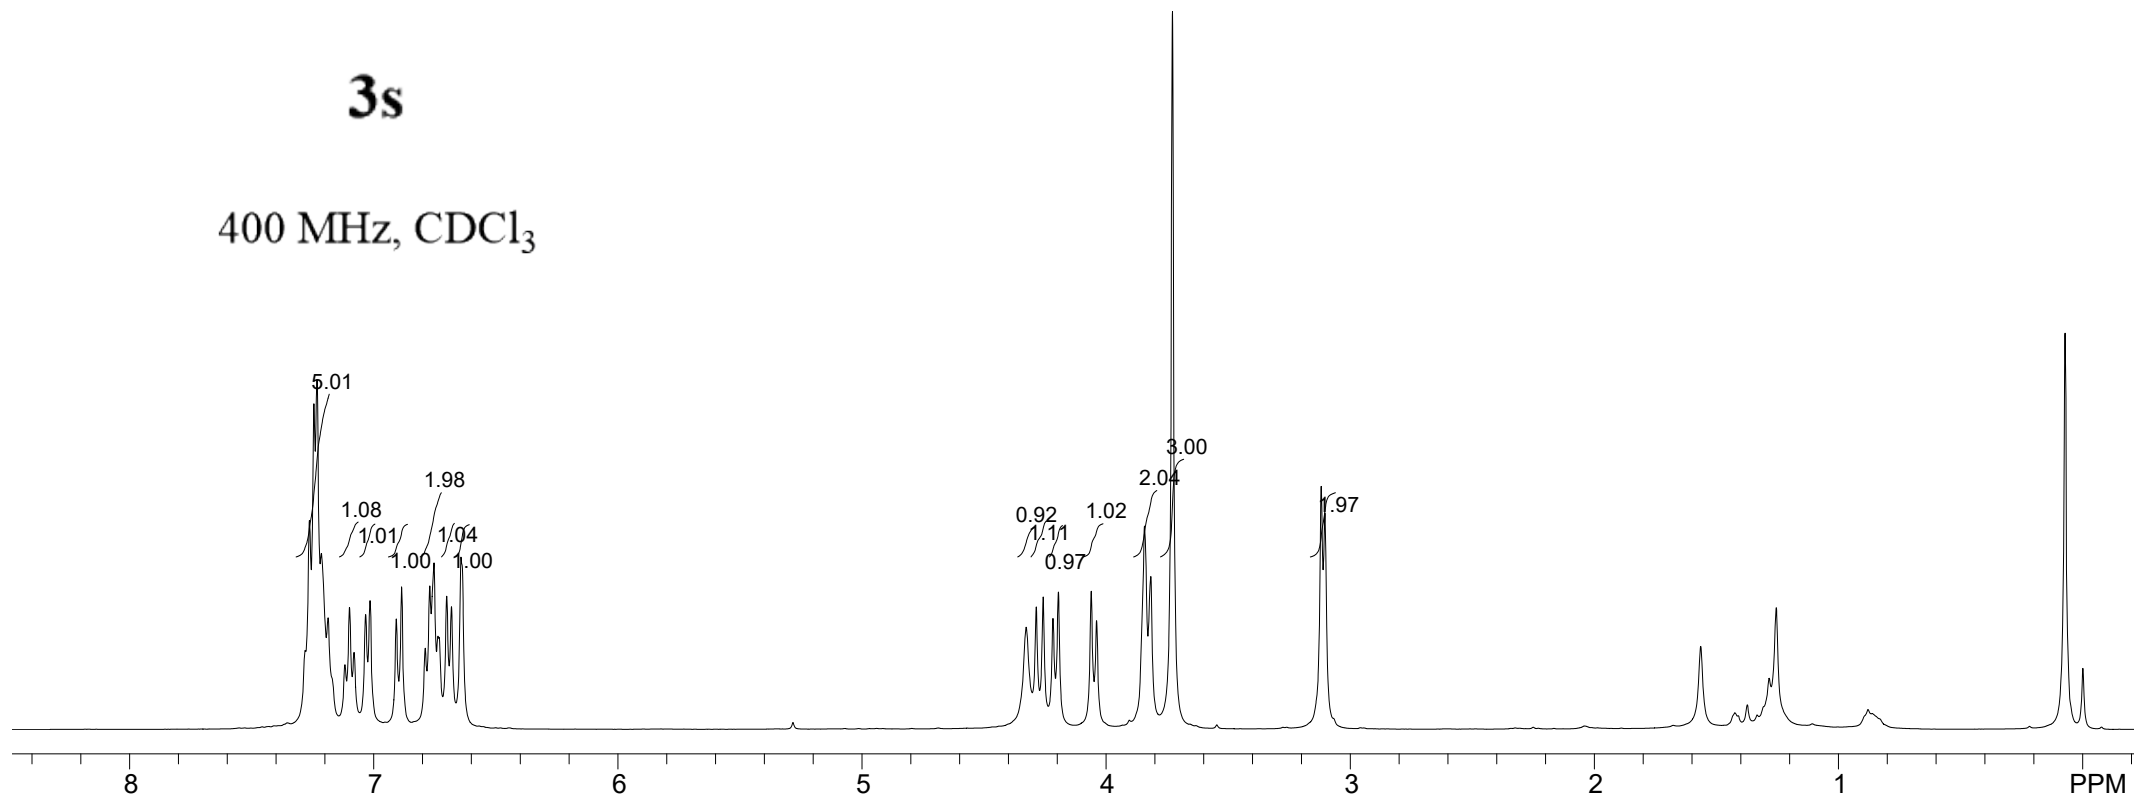

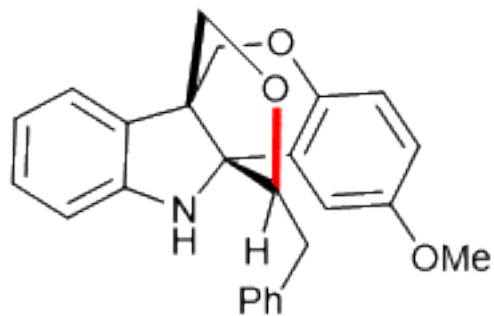

**3s**

100 MHz, CDCl<sub>3</sub>

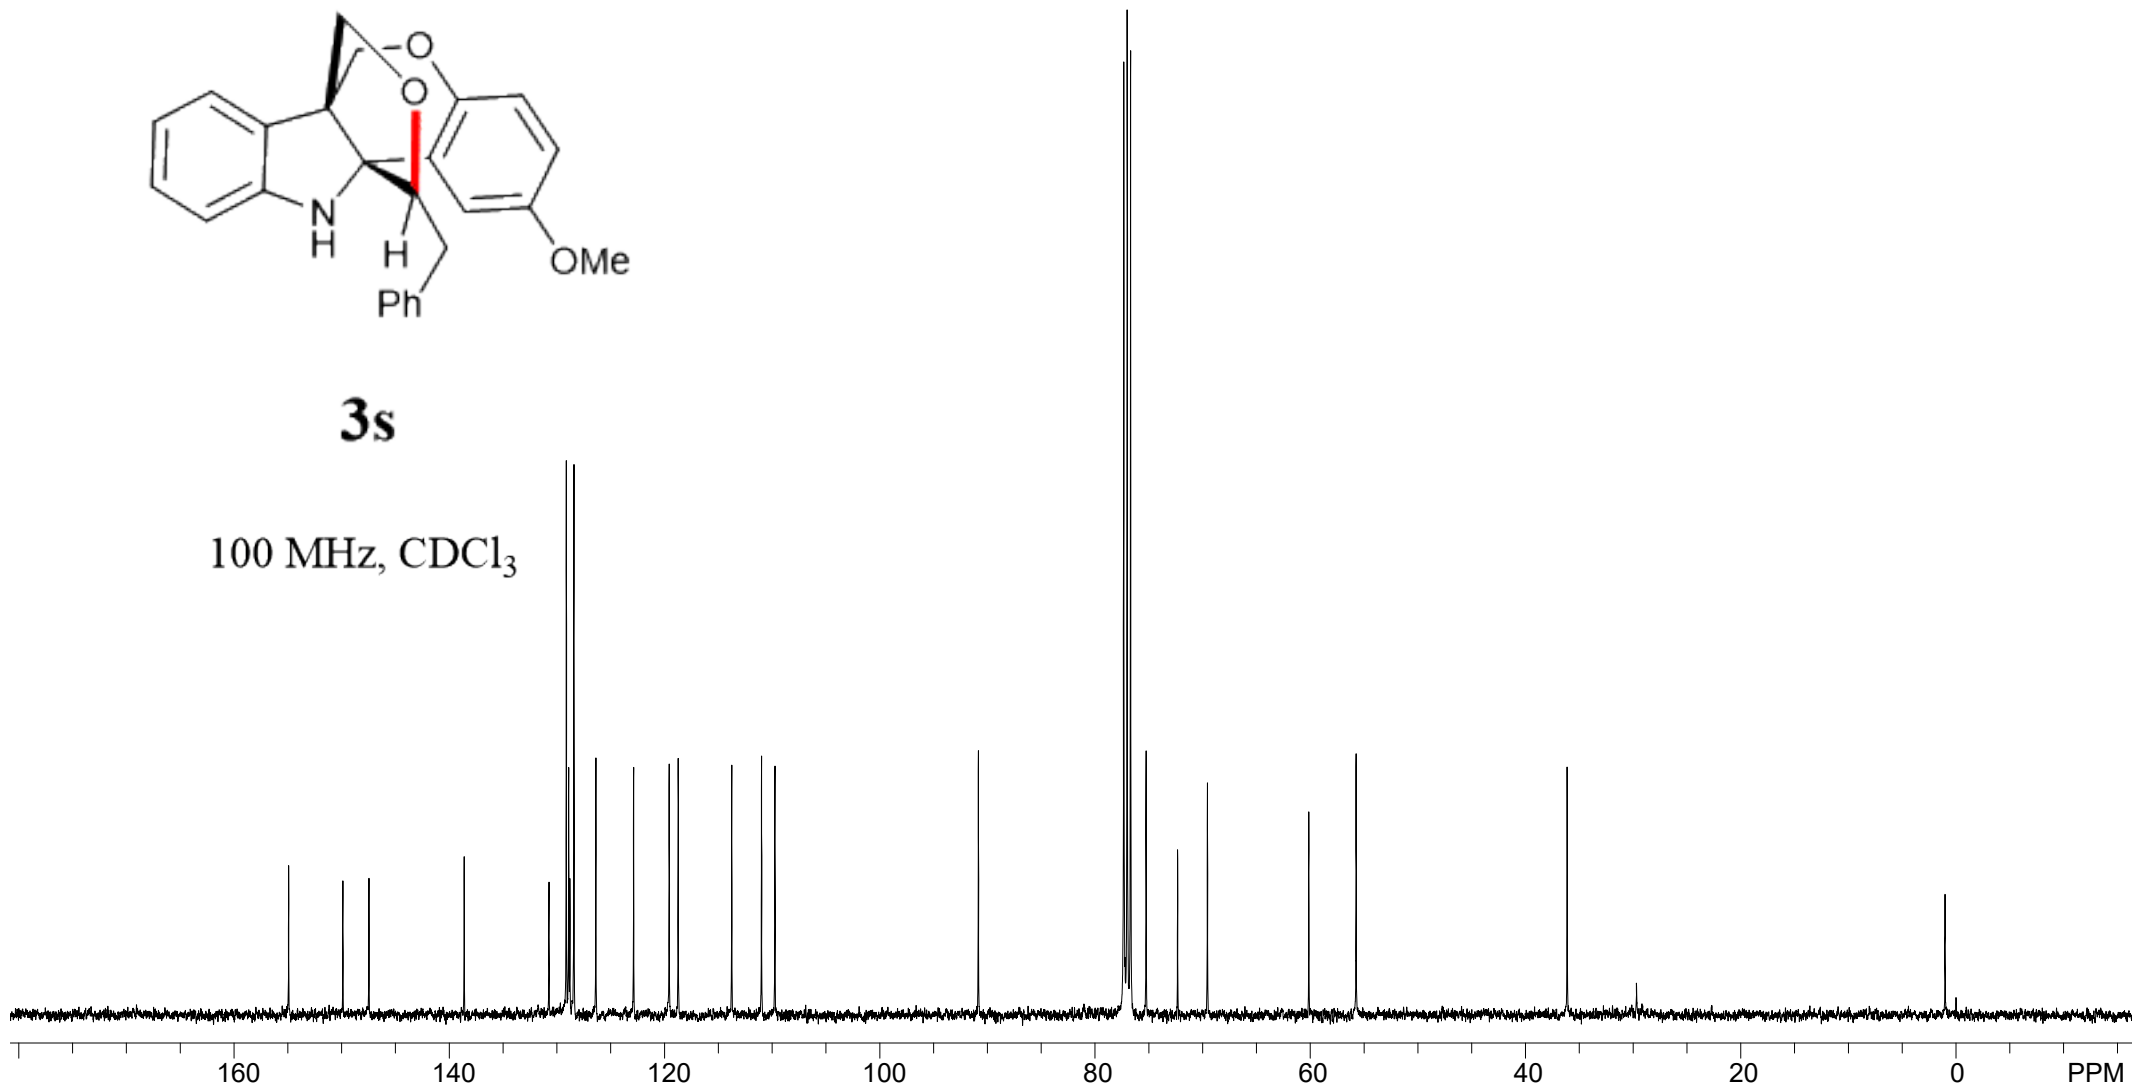

7.275  
7.257  
7.242  
7.225  
7.112  
7.094  
7.075  
7.035  
7.017  
6.975  
6.955  
6.843  
6.823  
6.781  
6.764  
6.730  
6.698  
6.679

4.326  
4.290  
4.262  
4.218  
4.196  
4.065  
4.043  
3.856  
3.830  
3.143  
3.128

2.231

0.000

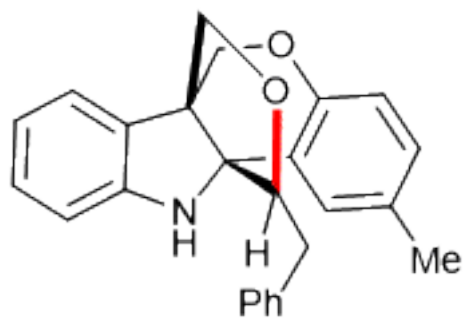

**3t**

400 MHz, CDCl<sub>3</sub>

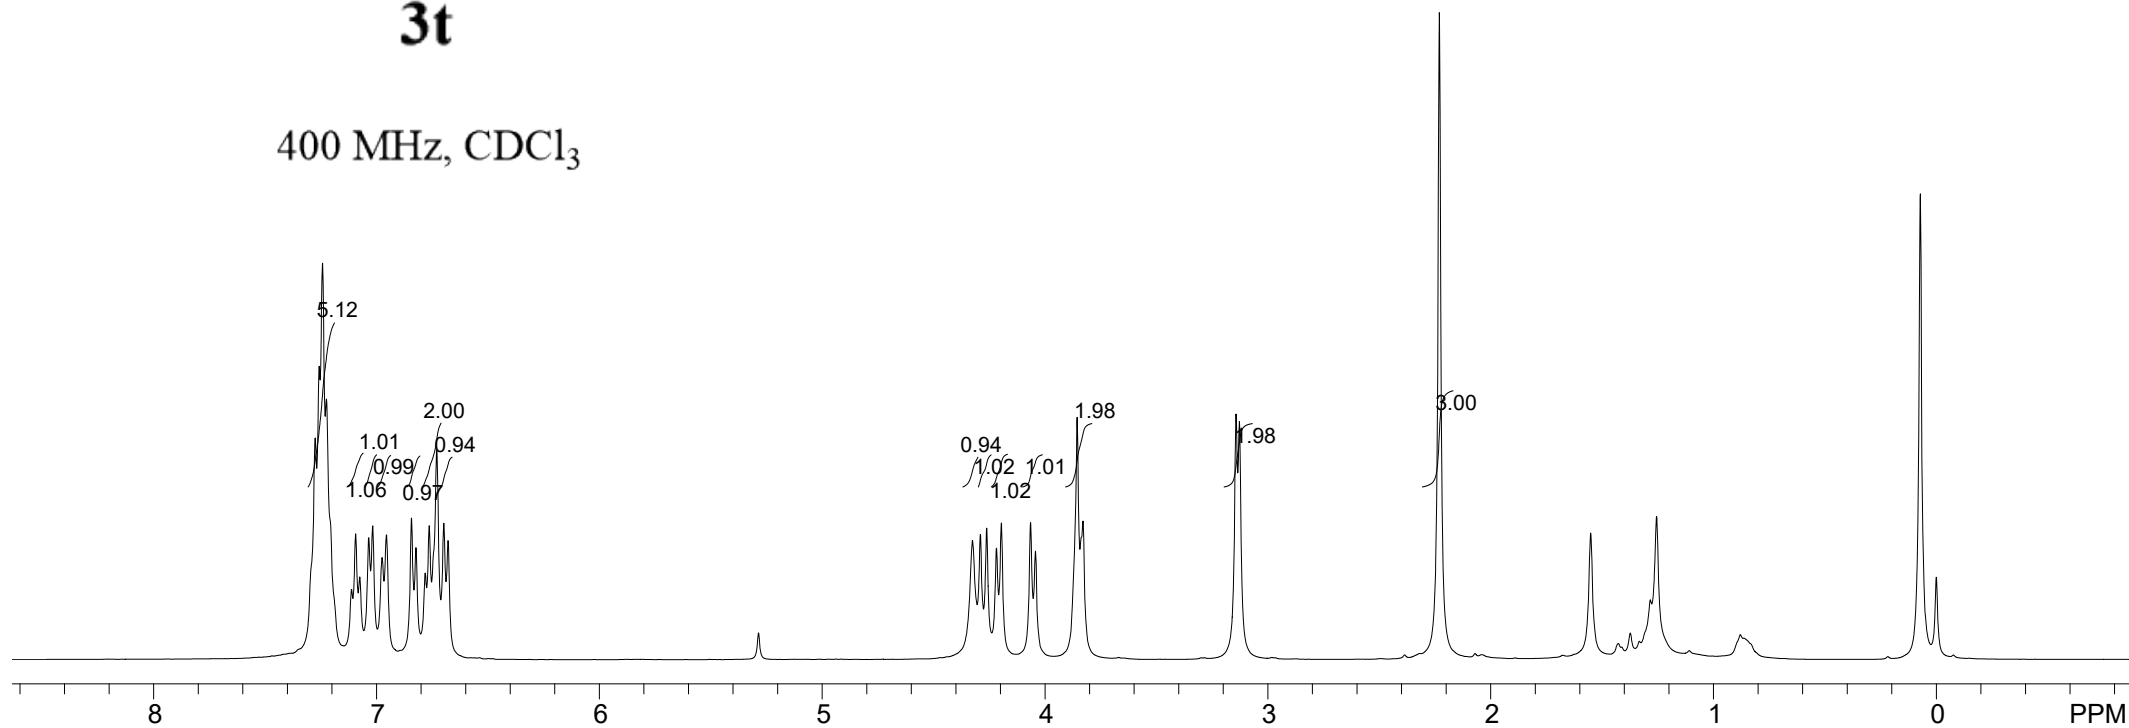

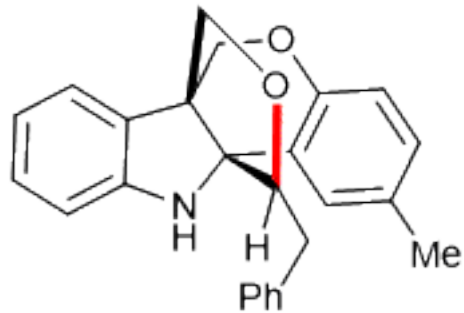

**3t**

100 MHz, CDCl<sub>3</sub>

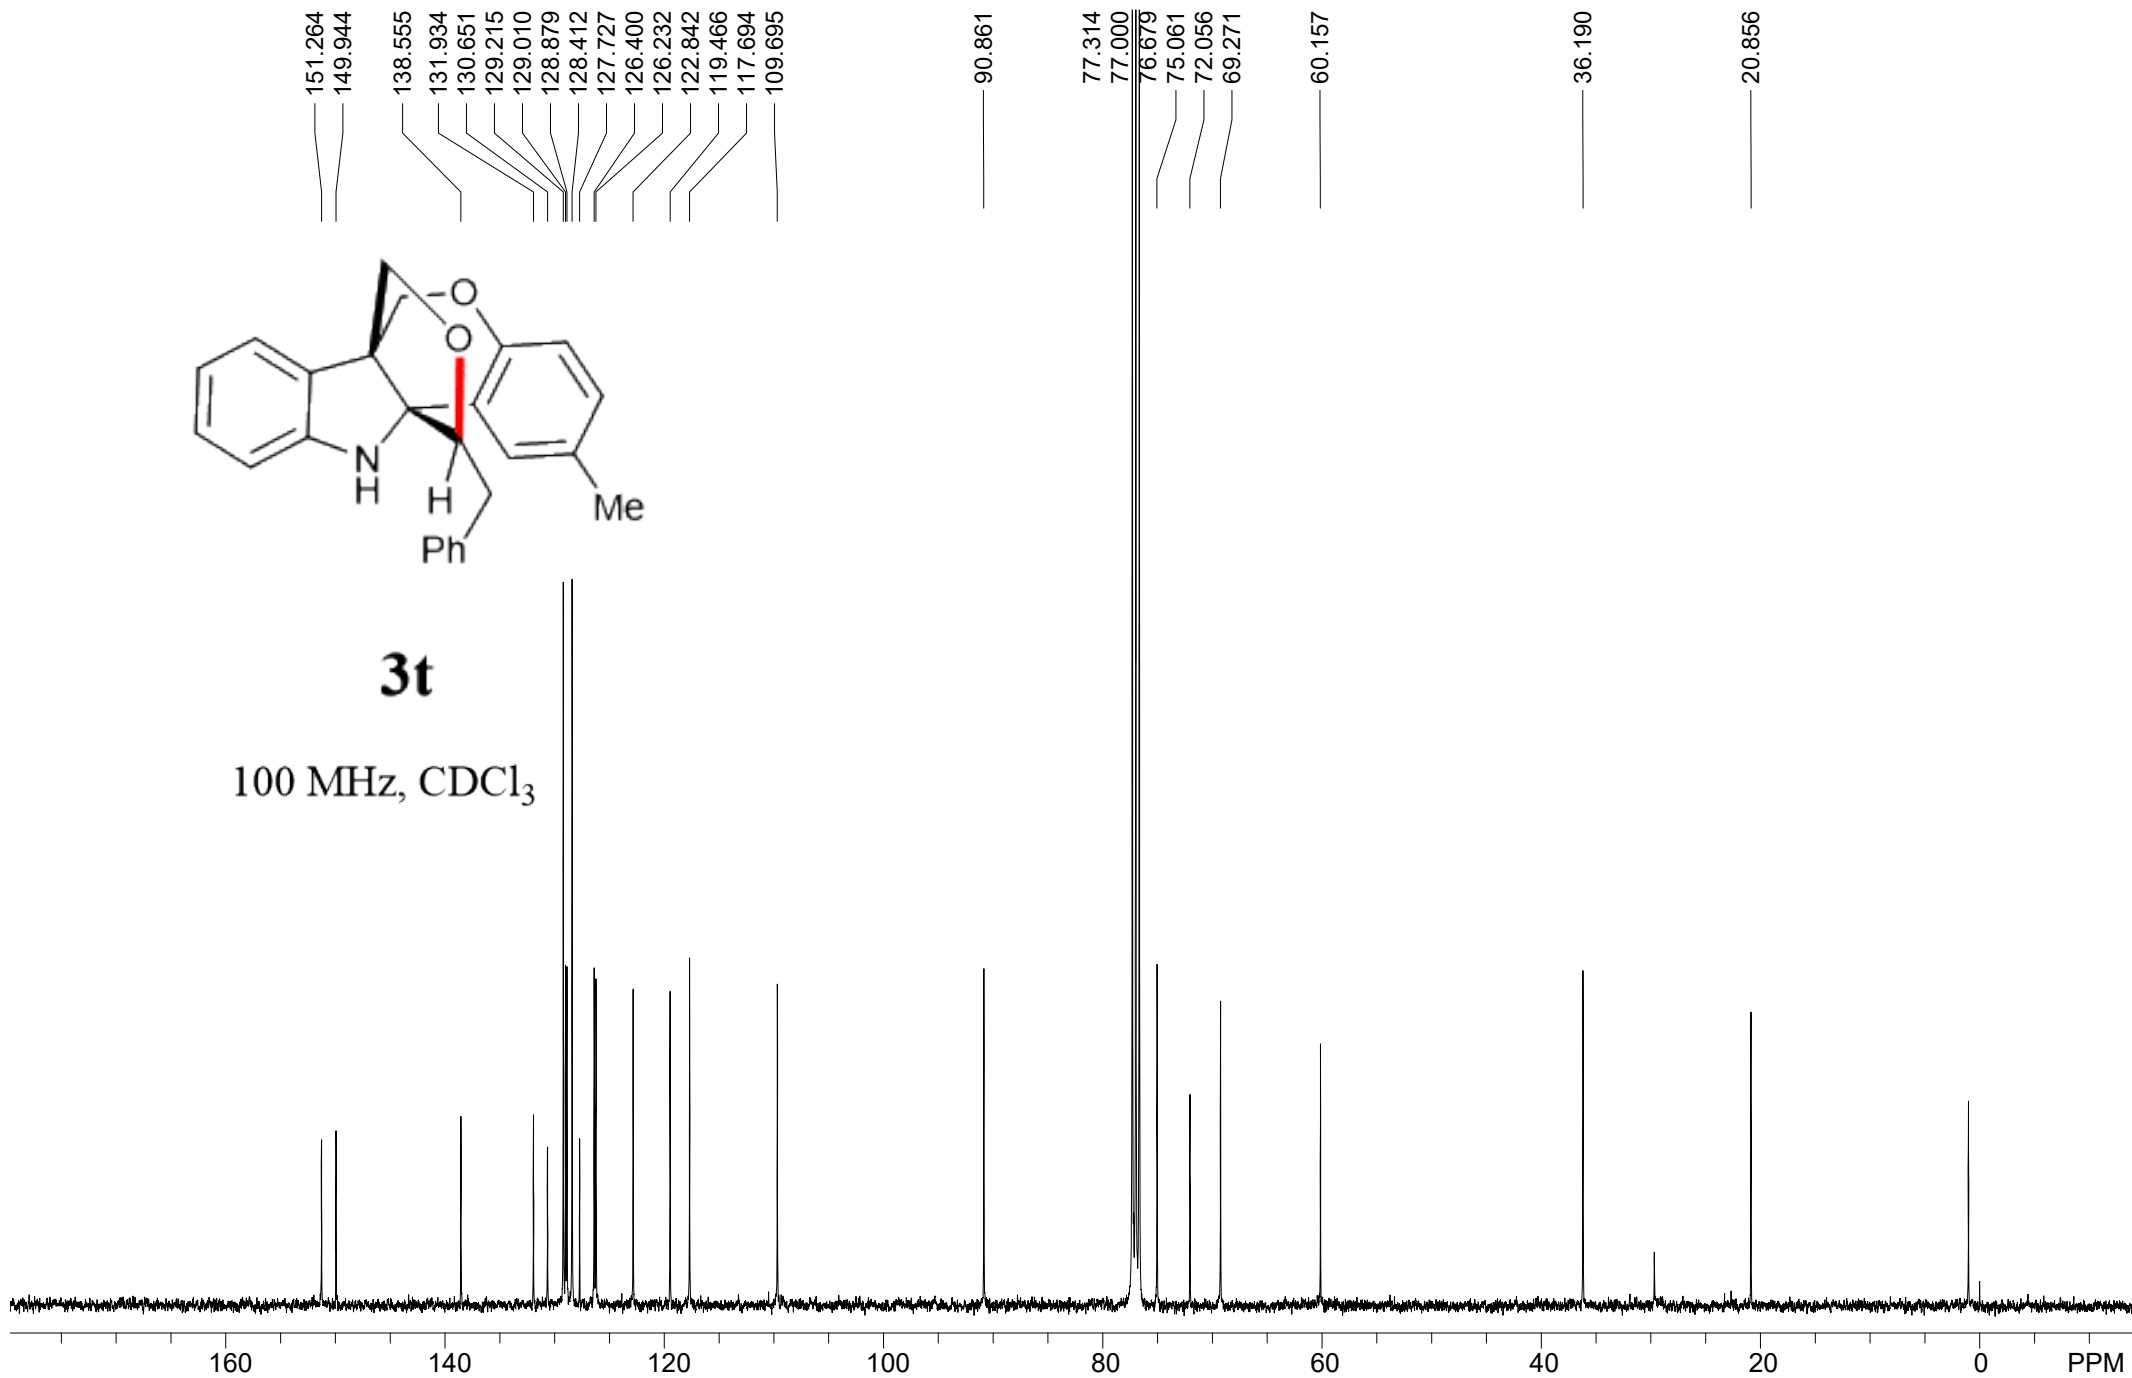

7.289  
7.270  
7.254  
7.220  
7.207  
7.126  
7.107  
7.088  
7.026  
7.008  
6.926  
6.904  
6.893  
6.874  
6.868  
6.852  
6.845  
6.794  
6.775  
6.757  
6.701  
6.682

4.310  
4.282  
4.221  
4.199  
4.057  
4.035  
3.831  
3.802  
3.790  
3.780  
3.139  
3.117  
3.104  
3.082  
3.073  
3.062  
3.037  
3.028

0.000

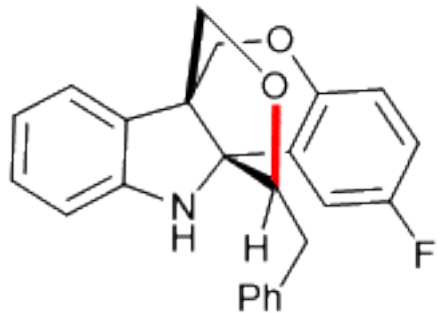

**3u**

400 MHz, CDCl<sub>3</sub>

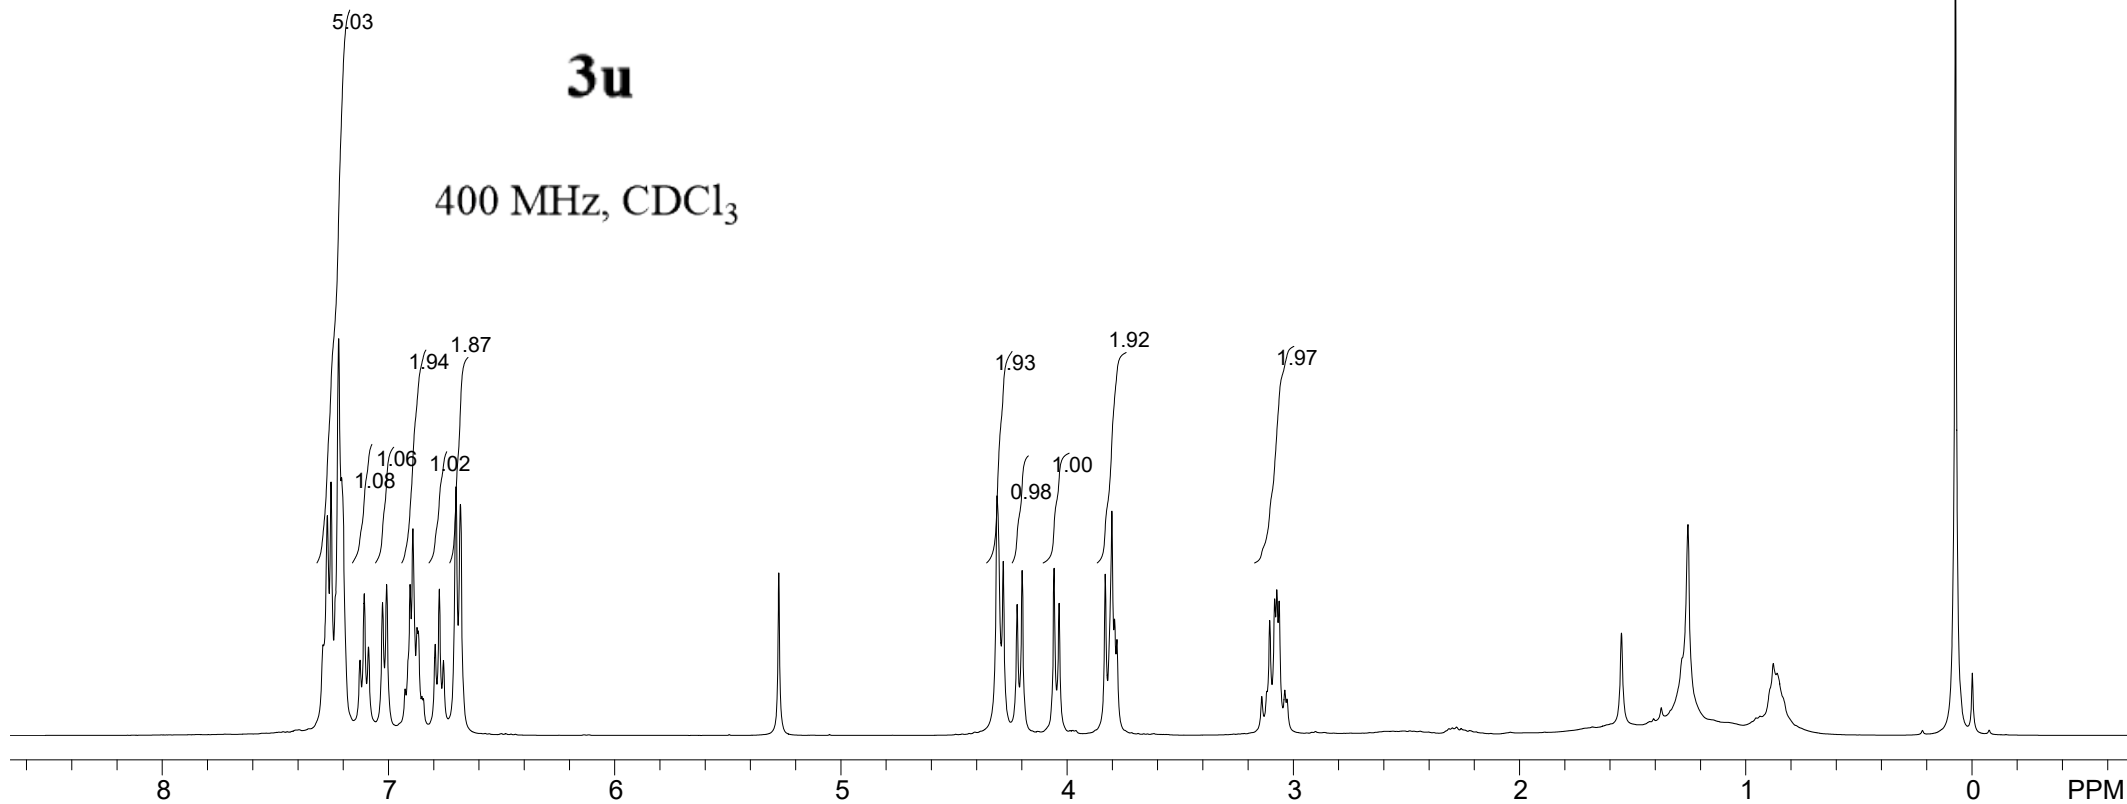

159.102  
156.711  
149.674  
149.631  
149.609  
138.154  
130.359  
129.426  
129.353  
129.120  
129.025  
128.485  
126.553  
122.878  
119.655  
119.269  
119.189  
115.280  
115.047  
112.451  
112.218  
109.688

90.759

77.321  
77.000  
76.687  
75.250  
72.210  
69.606  
60.208

35.927

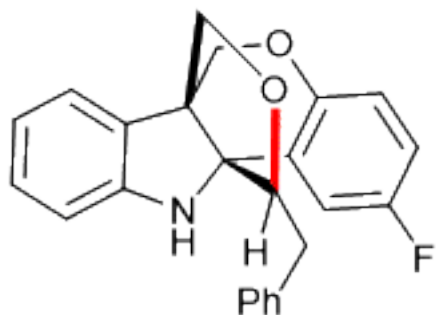

**3u**

100 MHz, CDCl<sub>3</sub>

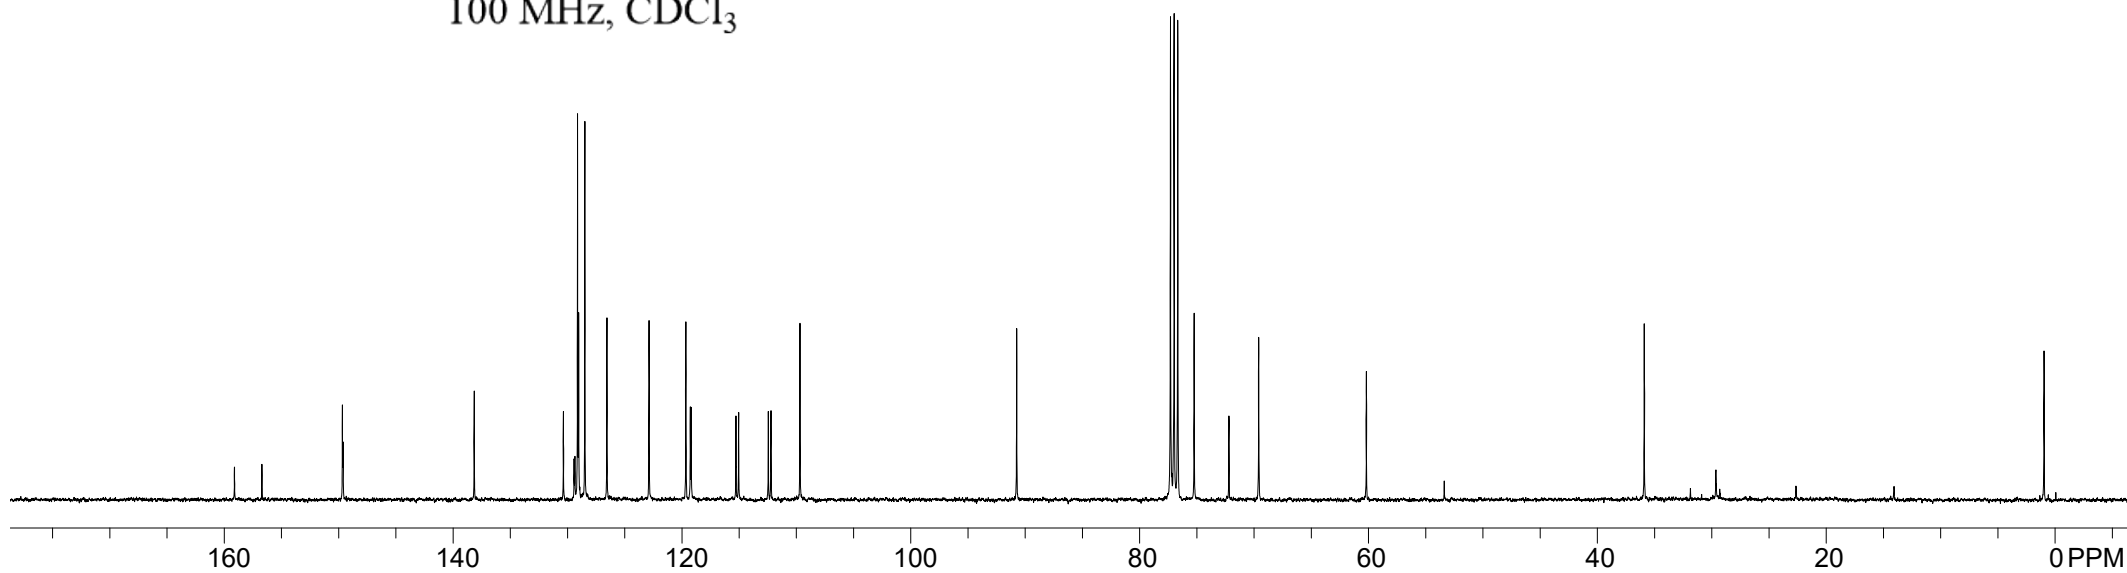

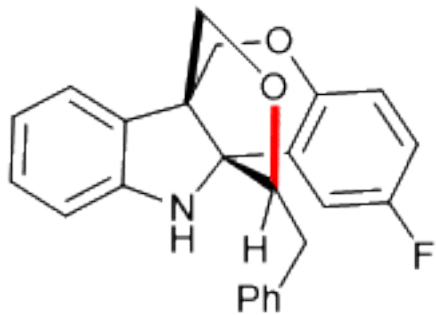

**3u**

376 MHz, CDCl<sub>3</sub>

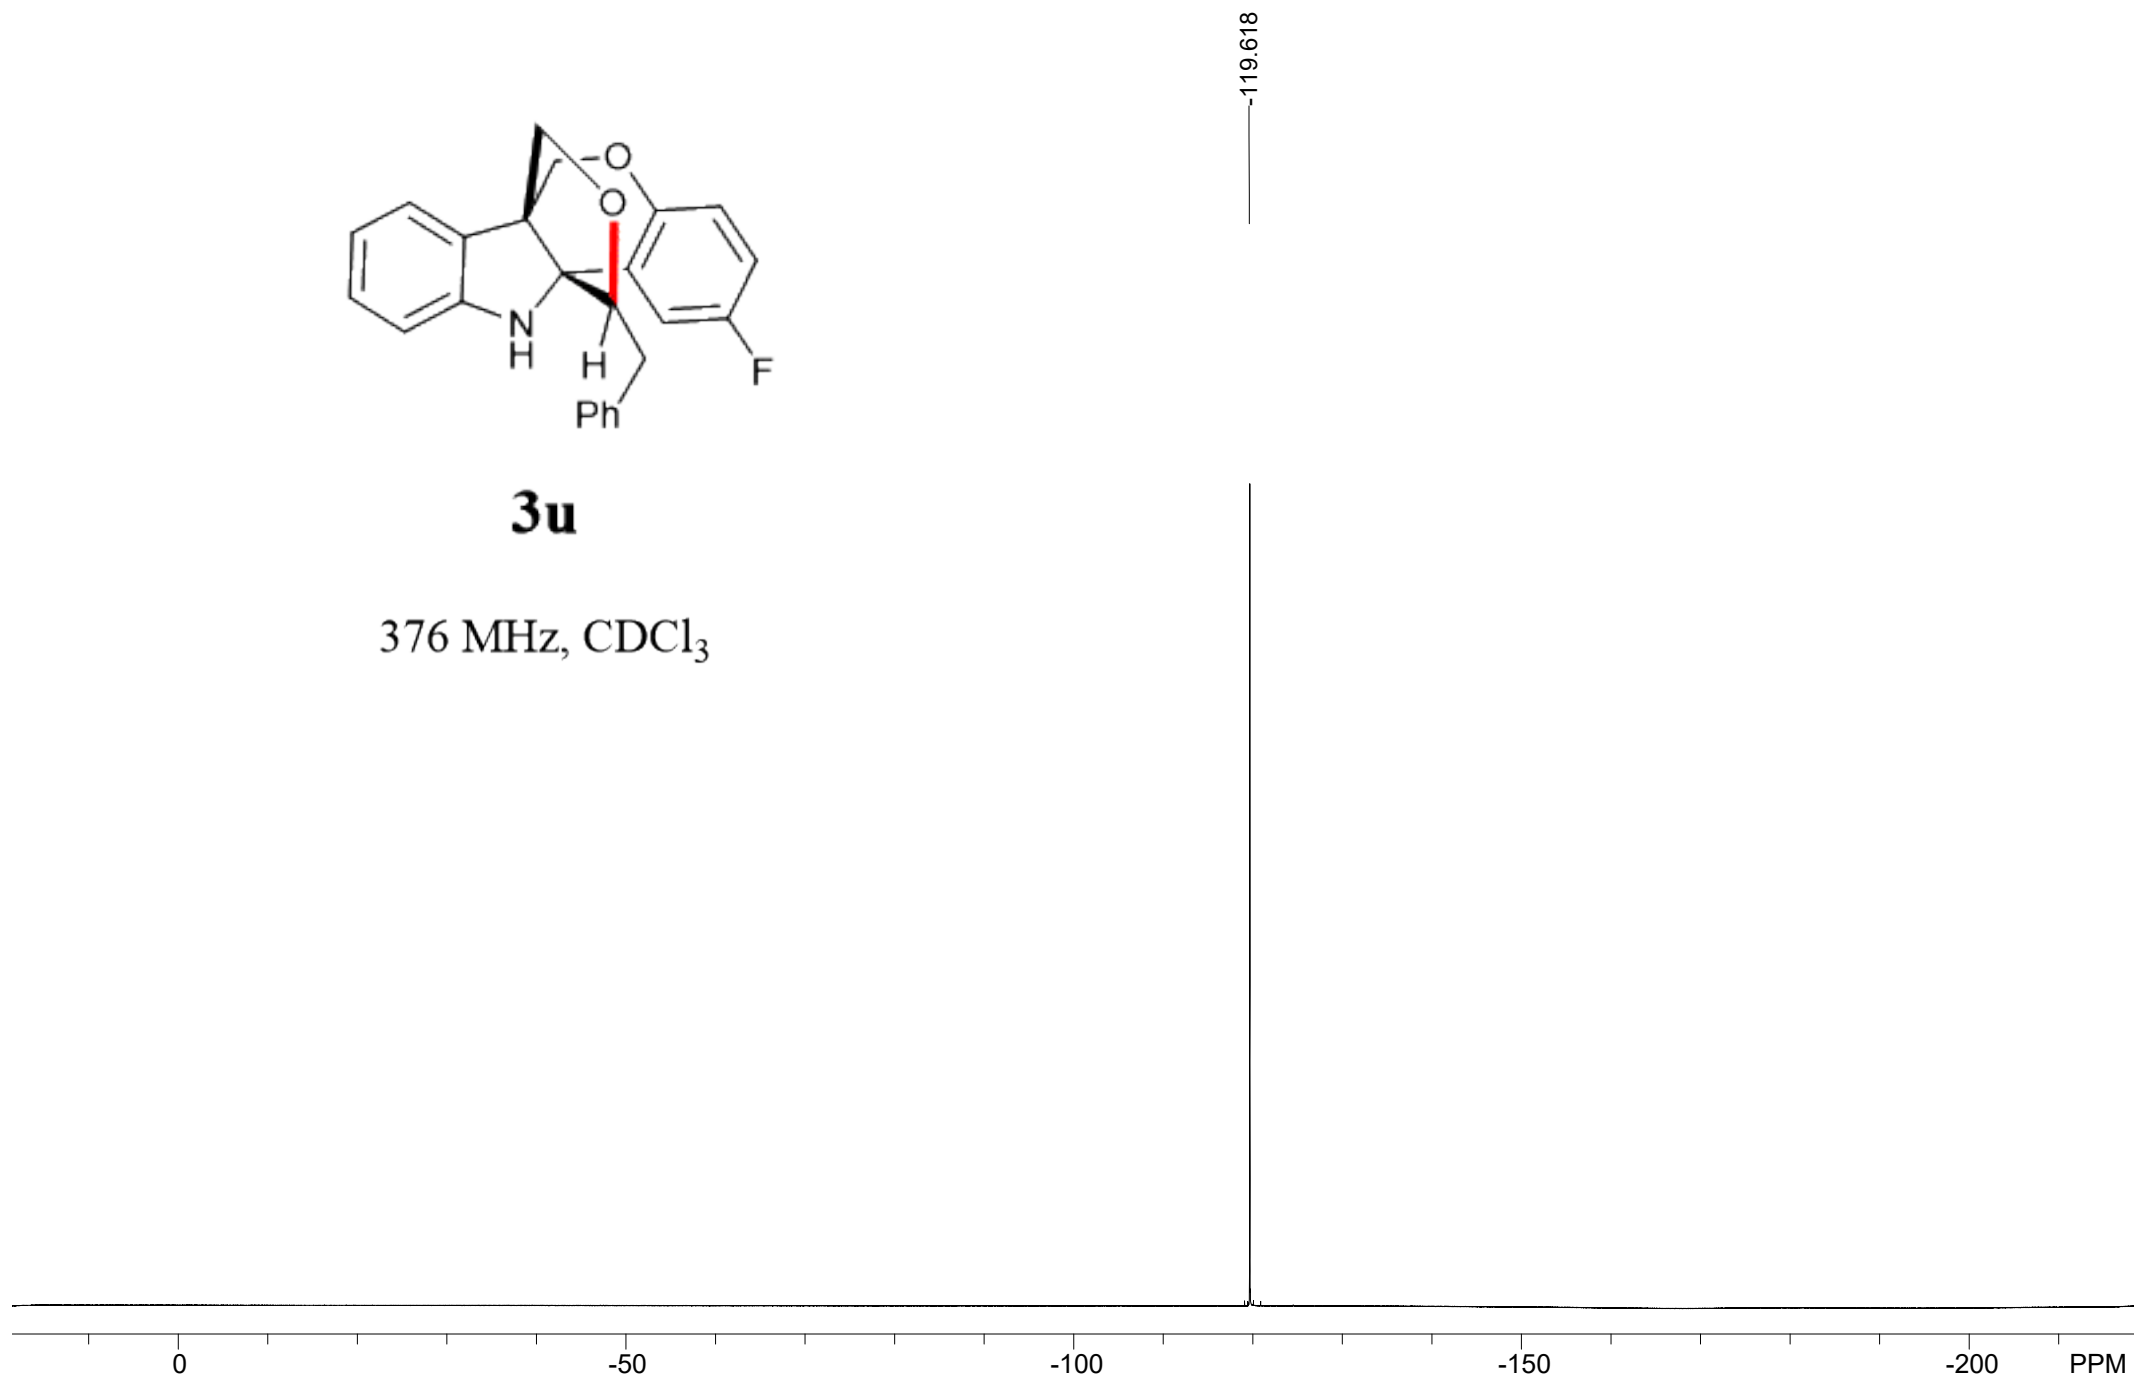



7.287  
7.268  
7.251  
7.211  
7.193  
7.124  
7.108  
7.088  
7.033  
7.015  
6.879  
6.859  
6.797  
6.779  
6.761  
6.695  
6.675

4.309  
4.281  
4.207  
4.185  
4.026  
4.004  
3.890  
3.861  
3.804  
3.793  
3.784  
3.773  
3.136  
3.114  
3.100  
3.079  
3.068  
3.044  
3.033

-0.000

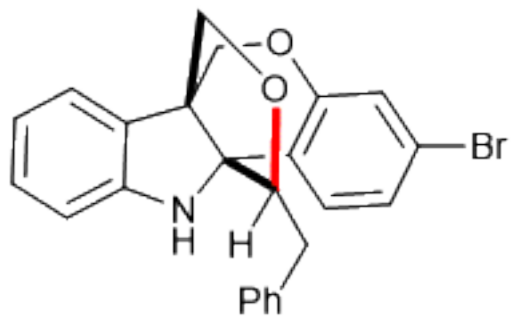

**3v**

400 MHz, CDCl<sub>3</sub>

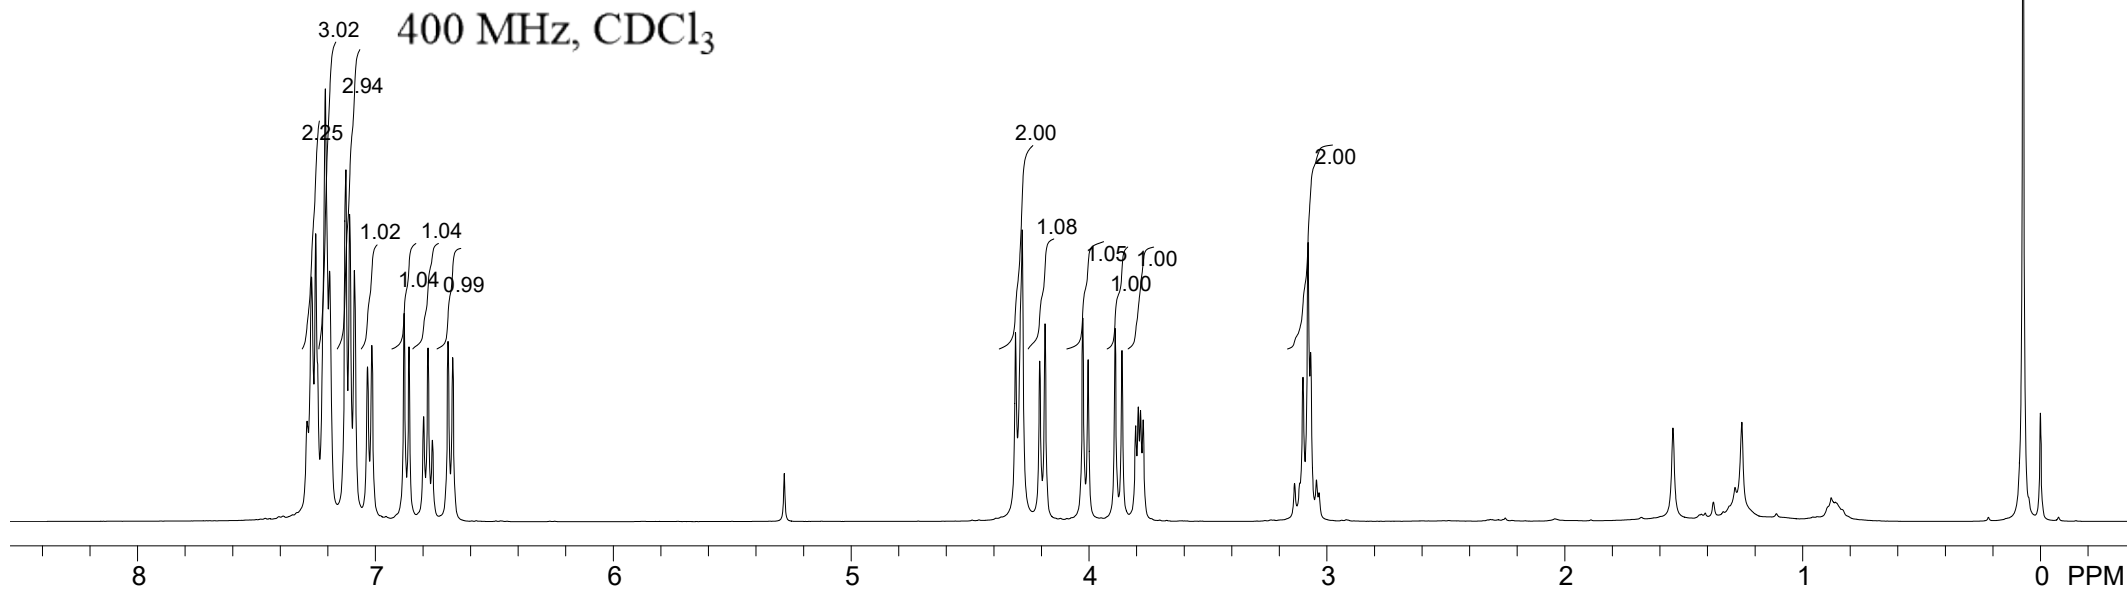

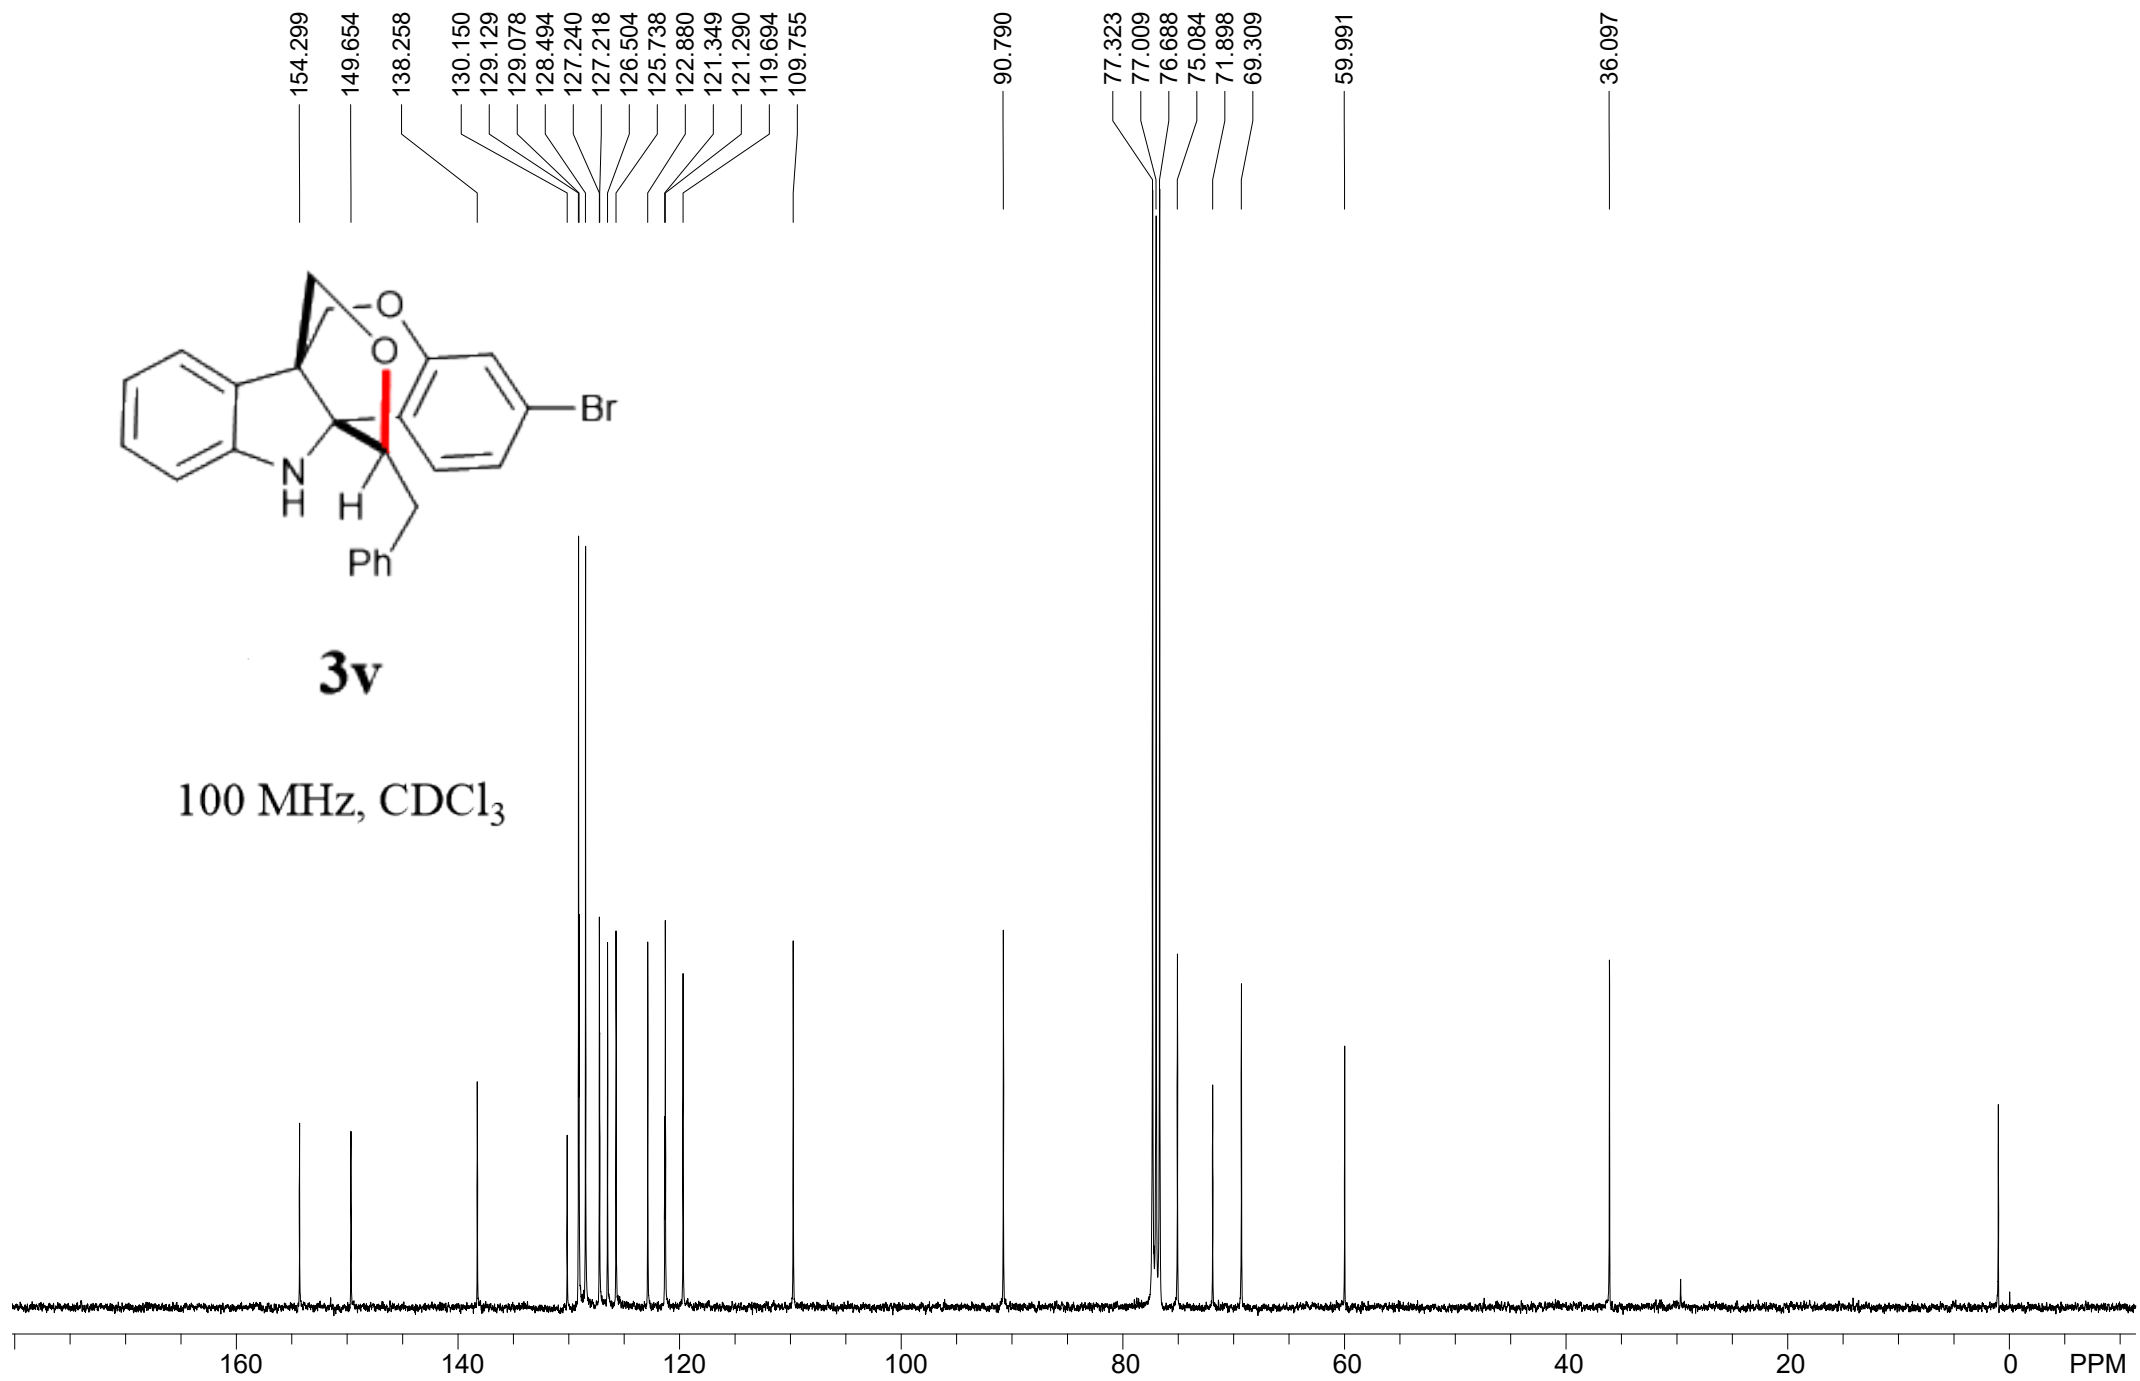

7.295  
7.276  
7.257  
7.250  
7.205  
7.190  
7.102  
7.083  
7.064  
7.033  
7.015  
6.775  
6.756  
6.737  
6.724  
6.685  
6.668

4.281  
4.258  
4.230  
4.200  
4.178  
4.037  
4.015  
3.889  
3.873  
3.858  
3.845  
3.150  
3.135

2.182  
2.128

-0.000

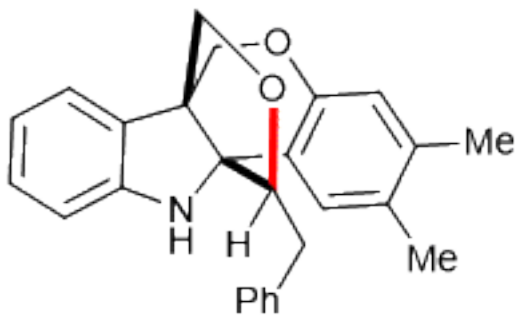

**3w**

400 MHz, CDCl<sub>3</sub>

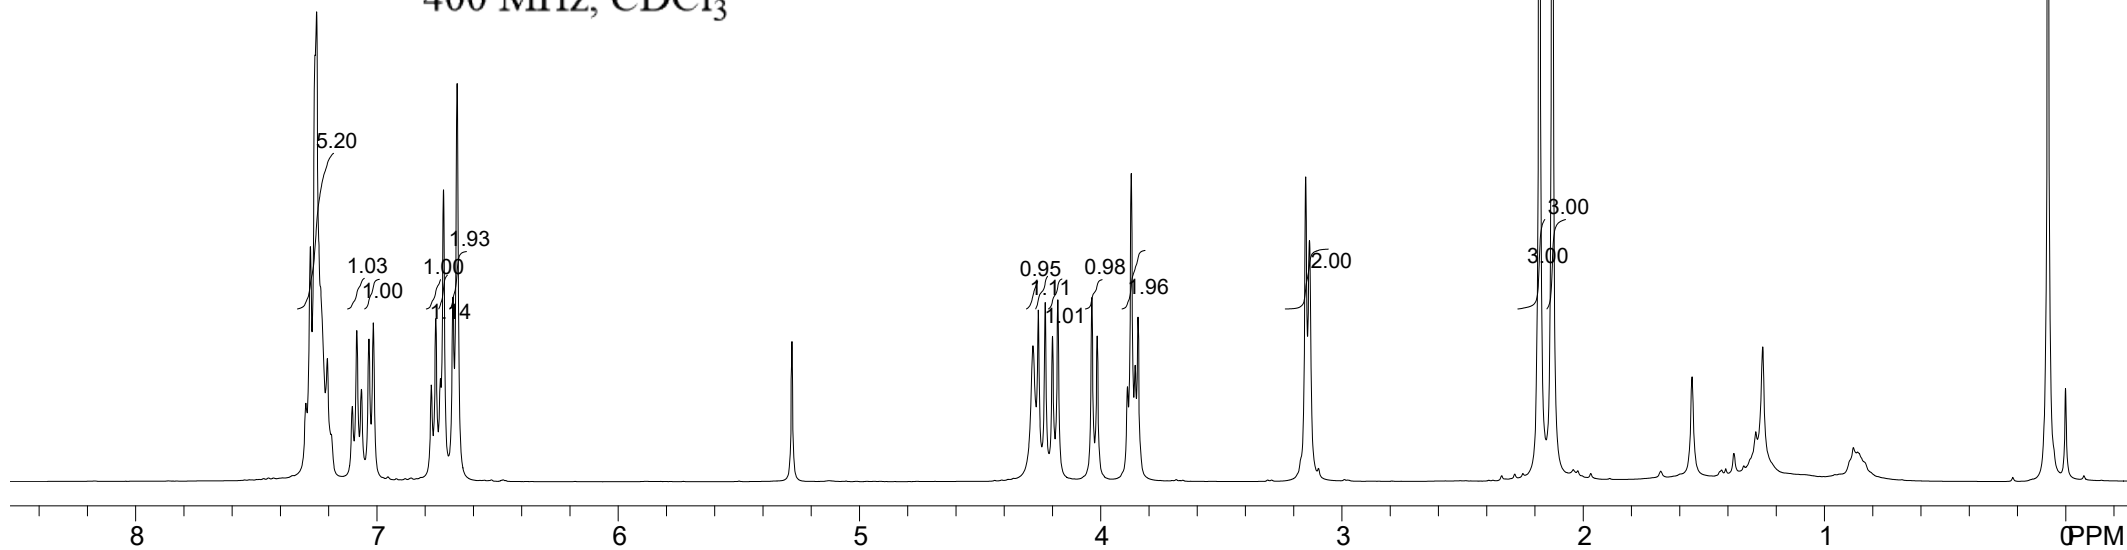

151.322  
149.988  
138.650  
137.002  
130.731  
130.673  
129.244  
128.835  
128.398  
126.648  
126.363  
125.066  
122.820  
119.415  
118.686  
109.739

90.883

77.321  
77.000  
76.686  
74.973  
71.903  
69.111

59.938

36.357

19.528  
19.186

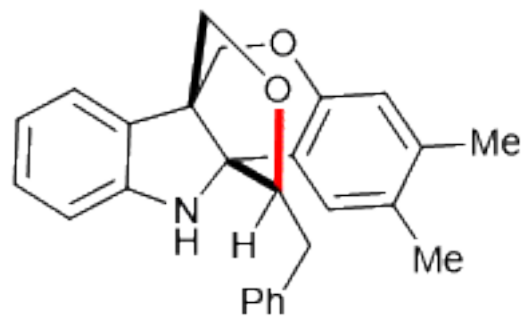

**3w**

100 MHz, CDCl<sub>3</sub>

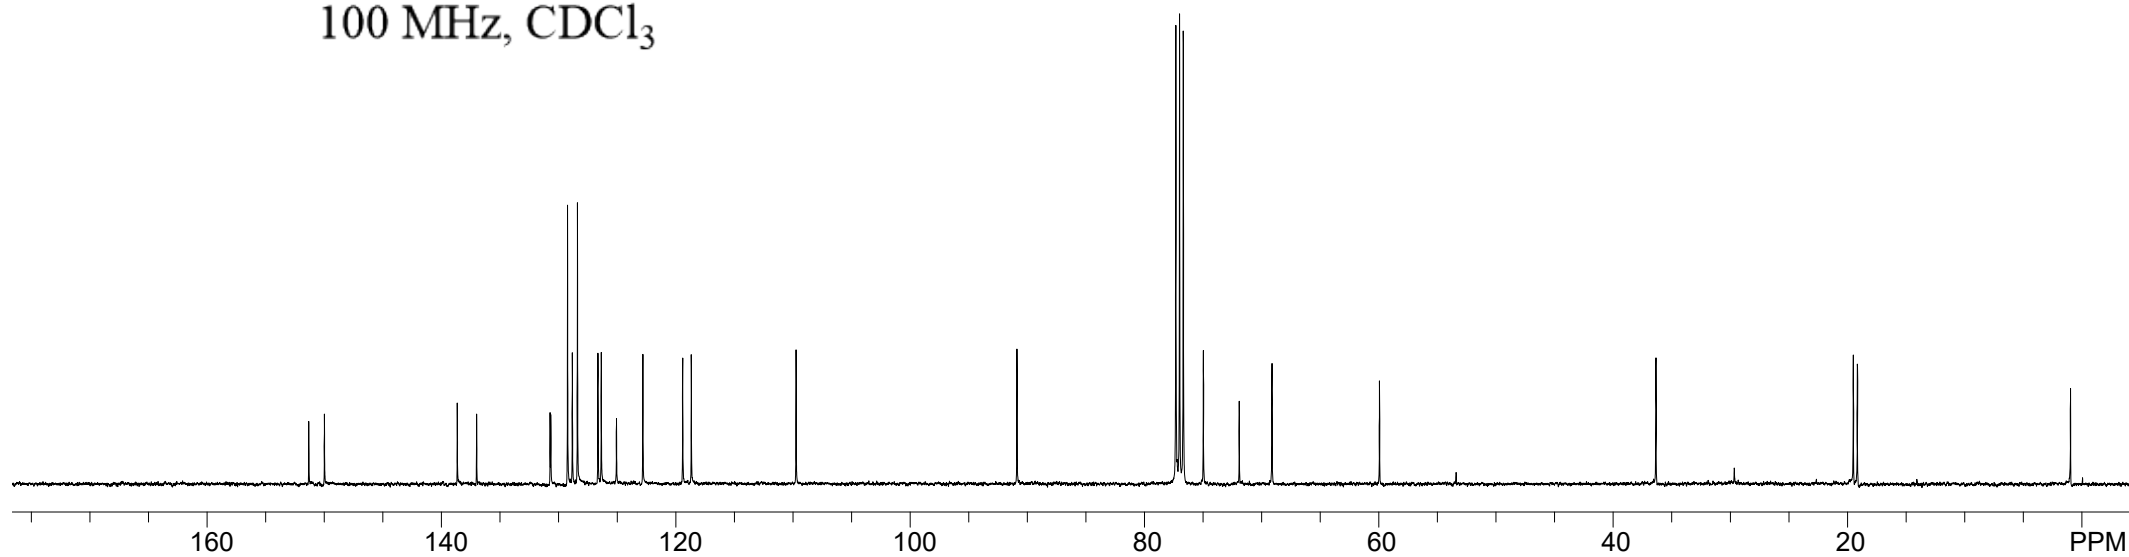

7.224  
7.210  
7.191  
7.166  
7.147  
7.075  
7.056  
7.037  
6.987  
6.970  
6.890  
6.871  
6.853  
6.778  
6.757  
6.742  
6.723  
6.705  
6.668  
6.649

4.424  
4.173  
4.152  
4.100  
4.078  
3.654  
3.645  
3.633  
3.624  
3.248  
3.220  
3.100  
3.065  
3.044  
3.013  
2.930  
2.902  
2.839

0.000

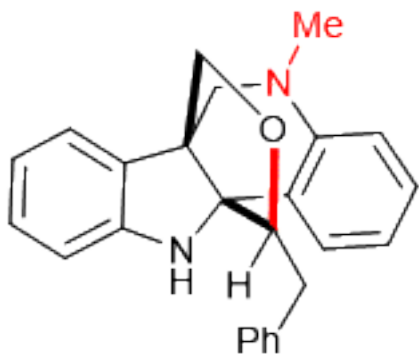

**3x**

400 MHz, CDCl<sub>3</sub>

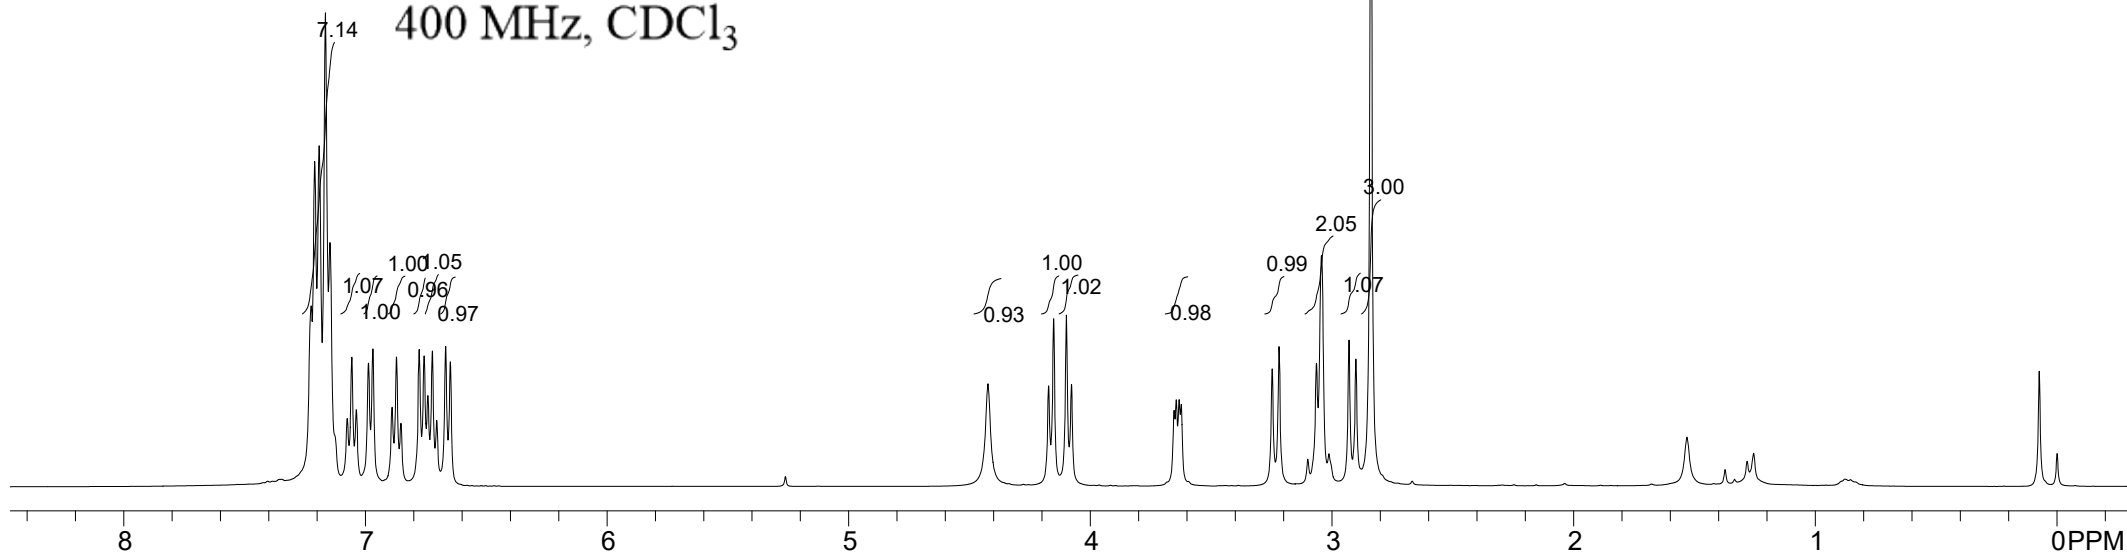

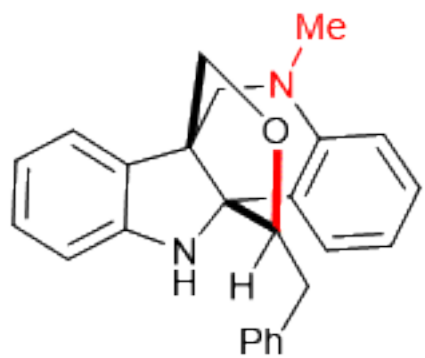

**3x**

100 MHz, CDCl<sub>3</sub>

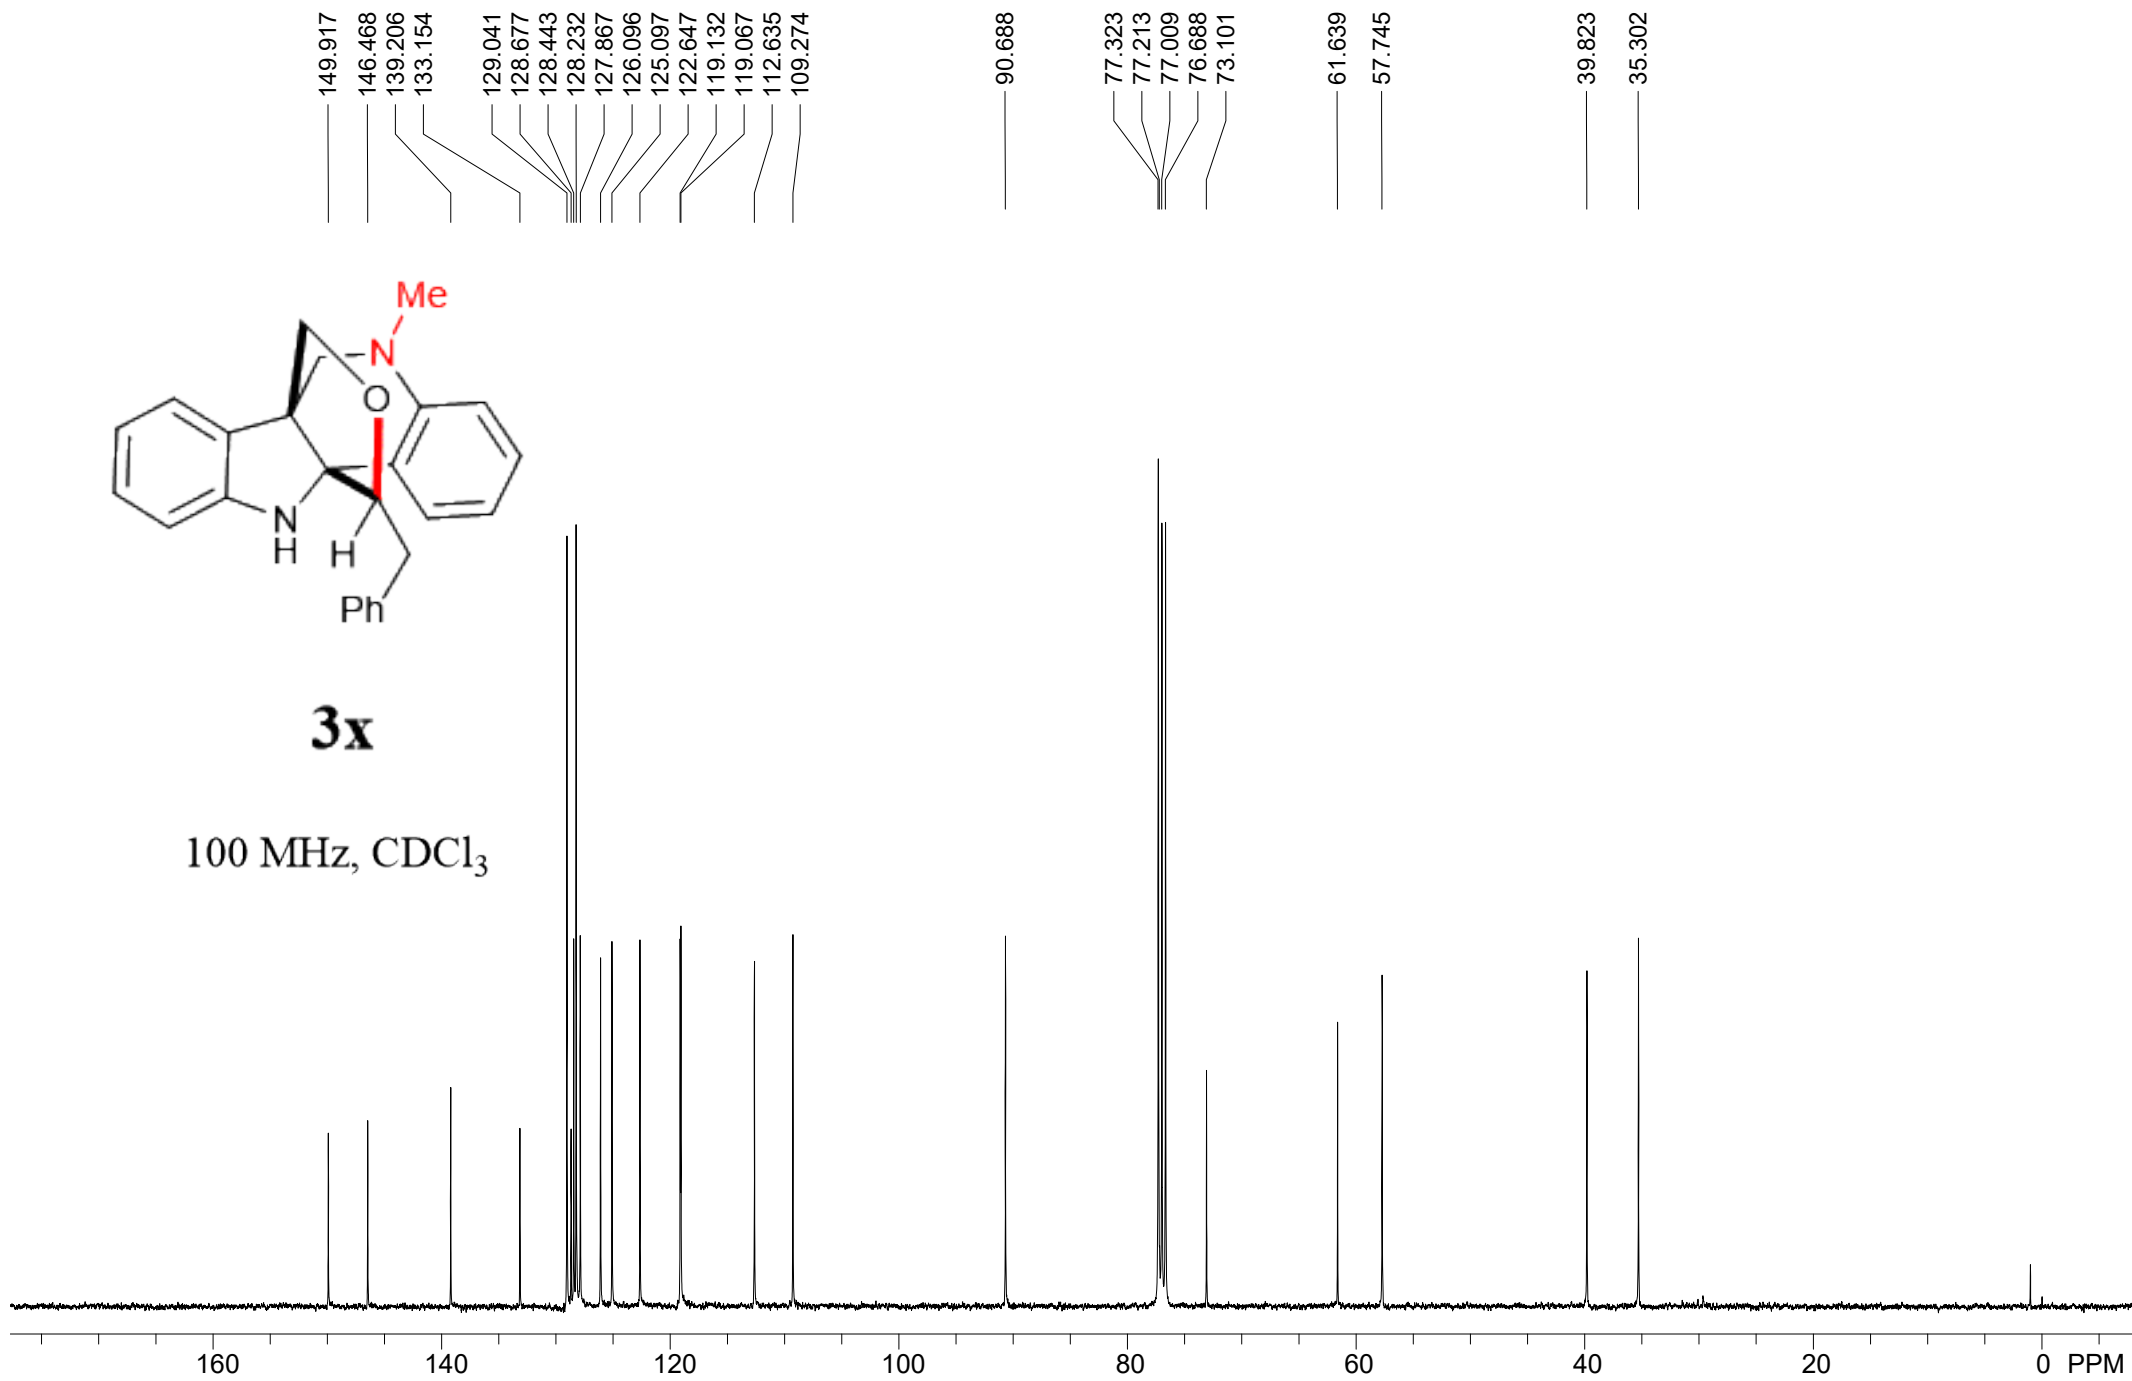

7.418  
7.400  
7.358  
7.339  
7.324  
7.312  
7.296  
7.276  
7.257  
7.128  
7.109  
7.091  
7.052  
7.034  
7.025  
7.006  
6.842  
6.823  
6.812  
6.794  
6.730  
6.710  
6.663  
6.644  
5.183  
4.900  
4.883  
4.867  
4.159  
3.930  
3.900  
3.891  
3.861  
3.414  
3.399

0.000

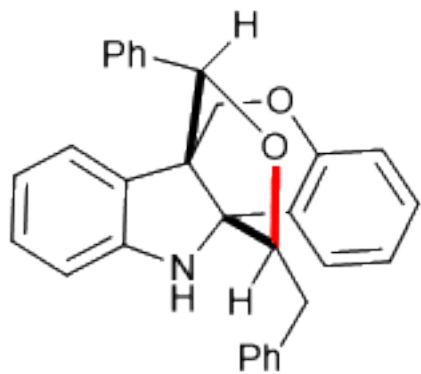

**3y** dr > 20:1

400 MHz, CDCl<sub>3</sub>

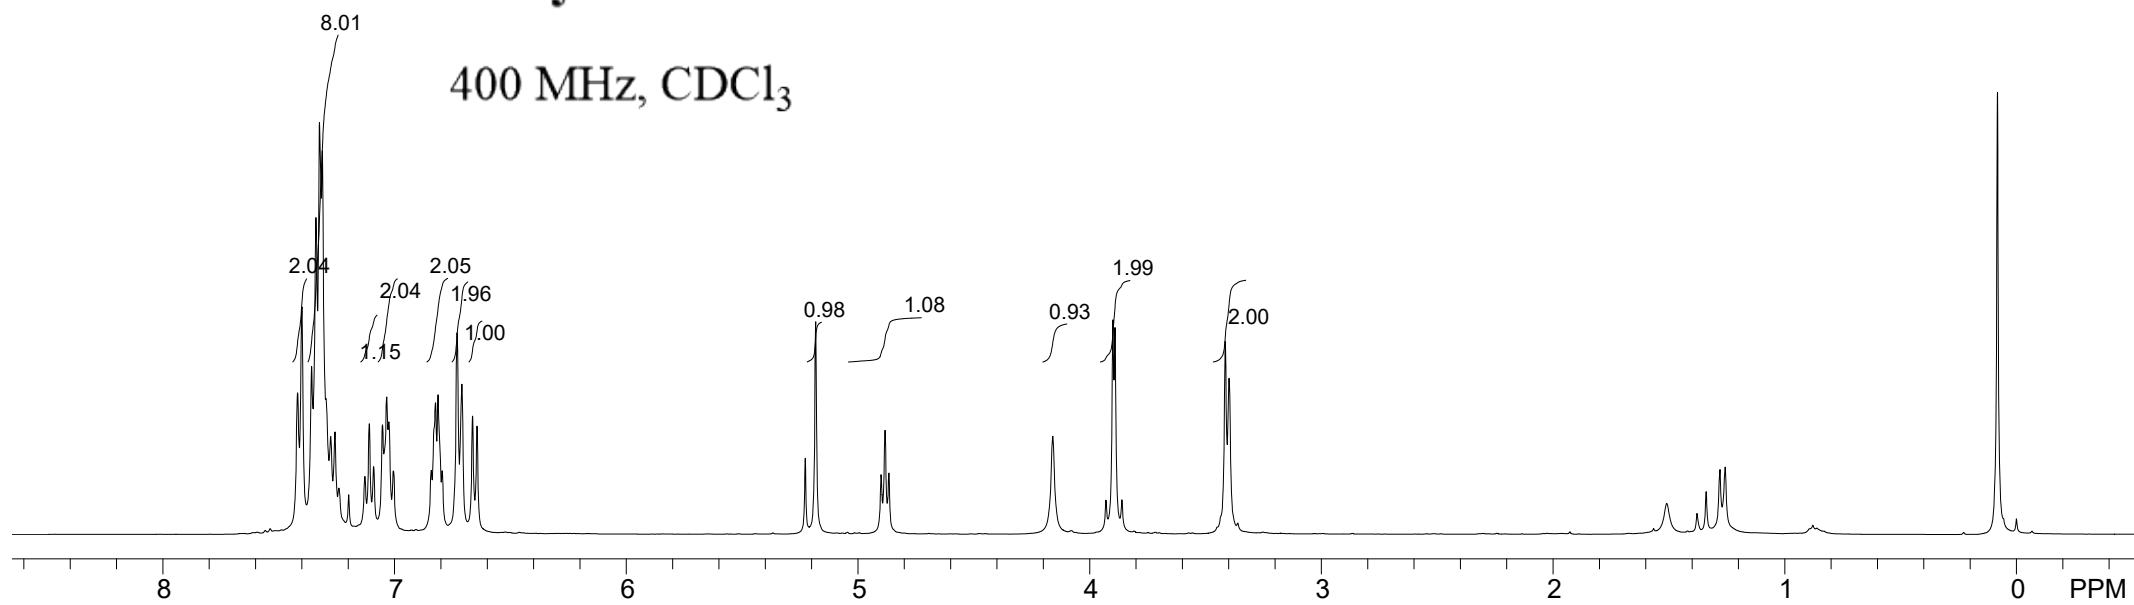

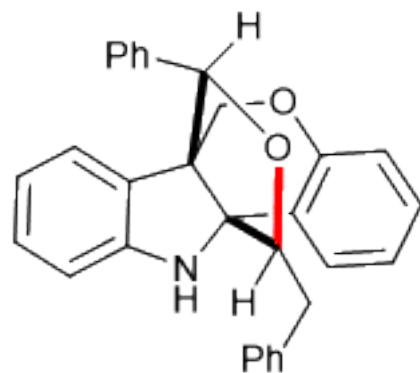

**3y** dr > 20:1

100 MHz, CDCl<sub>3</sub>

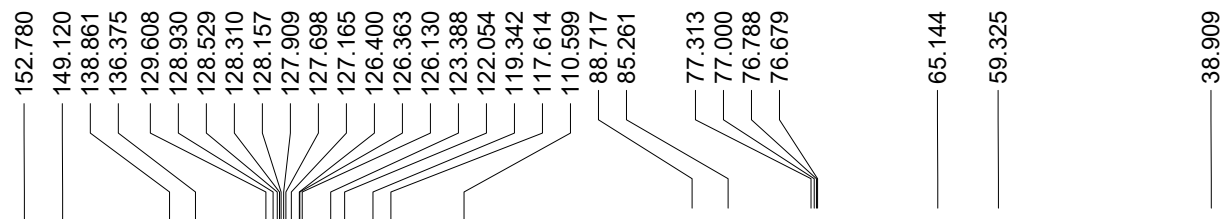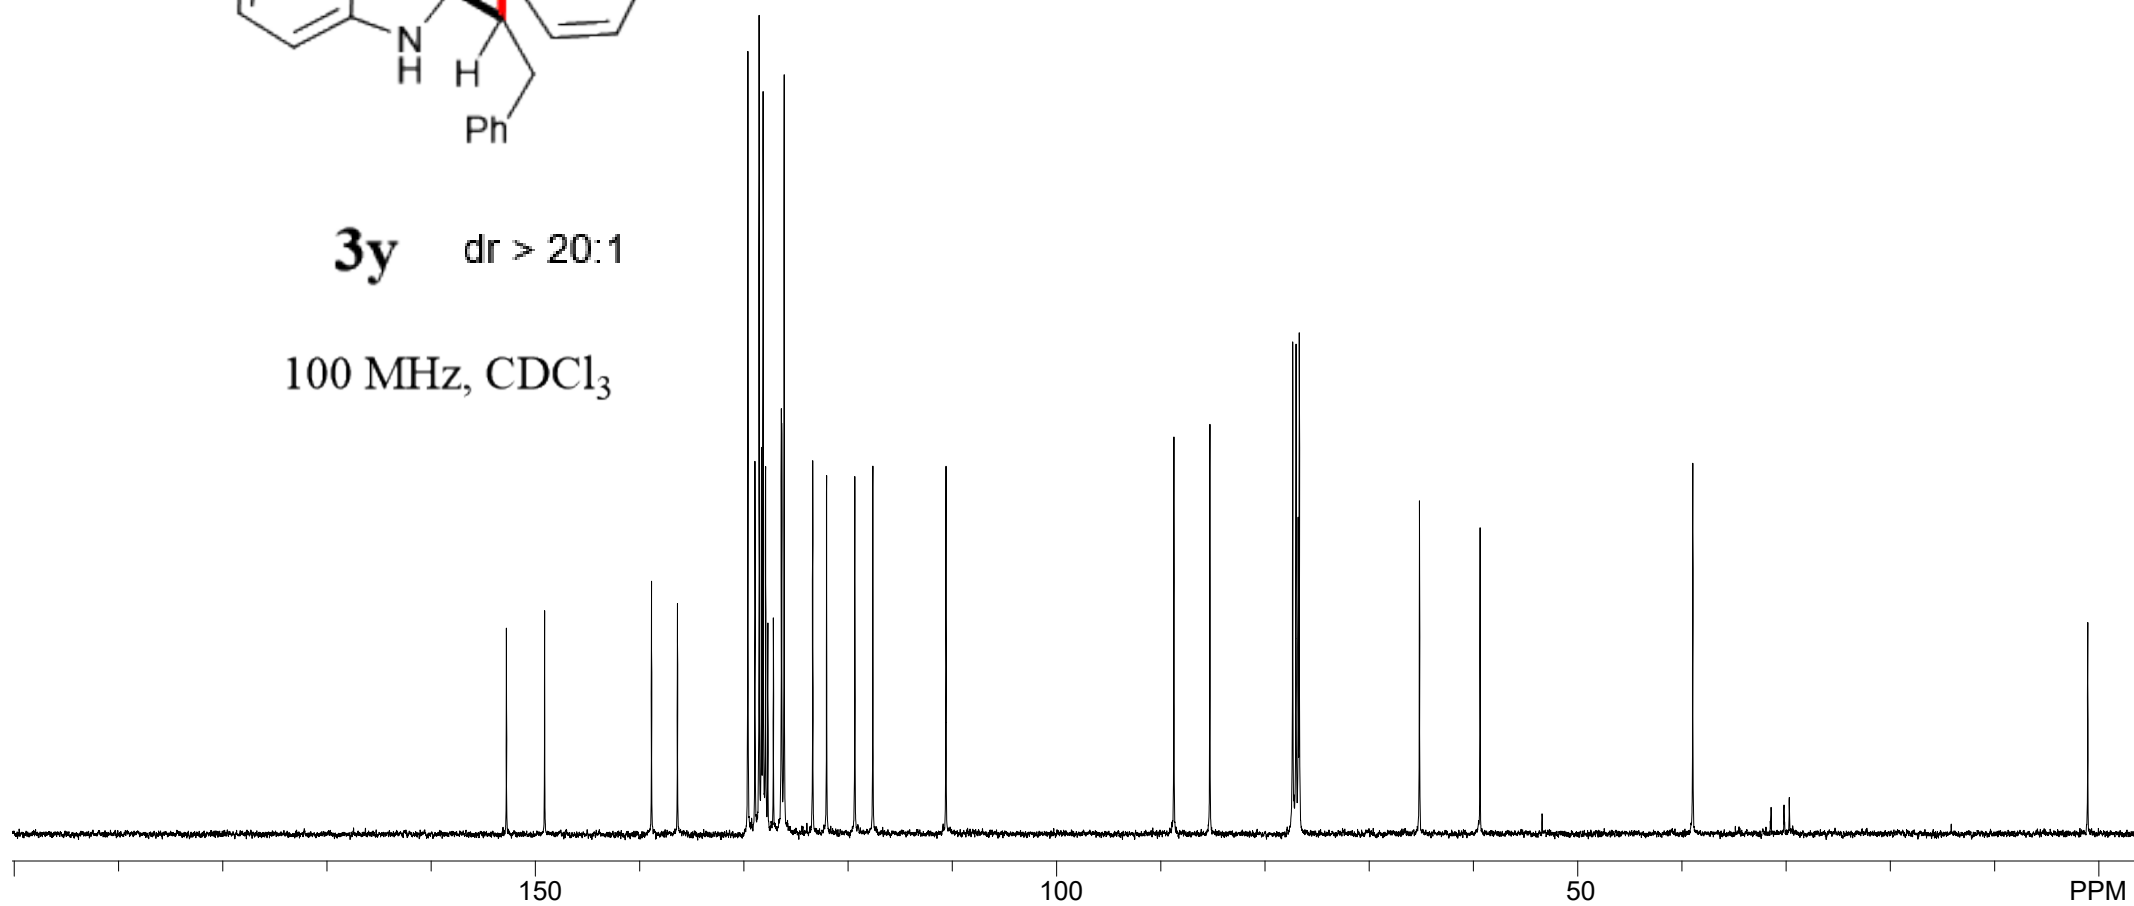



7.467  
7.448  
7.325  
7.305  
7.292  
7.274  
7.250  
7.231  
7.218  
7.201  
7.174  
7.156  
7.149  
7.129  
7.095  
7.077  
7.058  
7.005  
6.984  
6.916  
6.897  
6.878  
6.720  
6.701  
5.300  
4.631  
4.599  
4.151  
4.120  
3.919  
3.890  
3.877  
3.848  
3.755  
3.727

2.511  
2.477  
2.209  
2.179  
2.147

1.255

-0.000

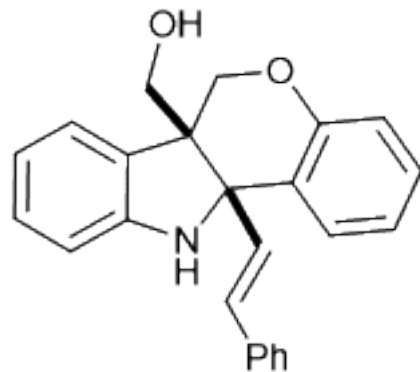

**2a**

400 MHz, CDCl<sub>3</sub>

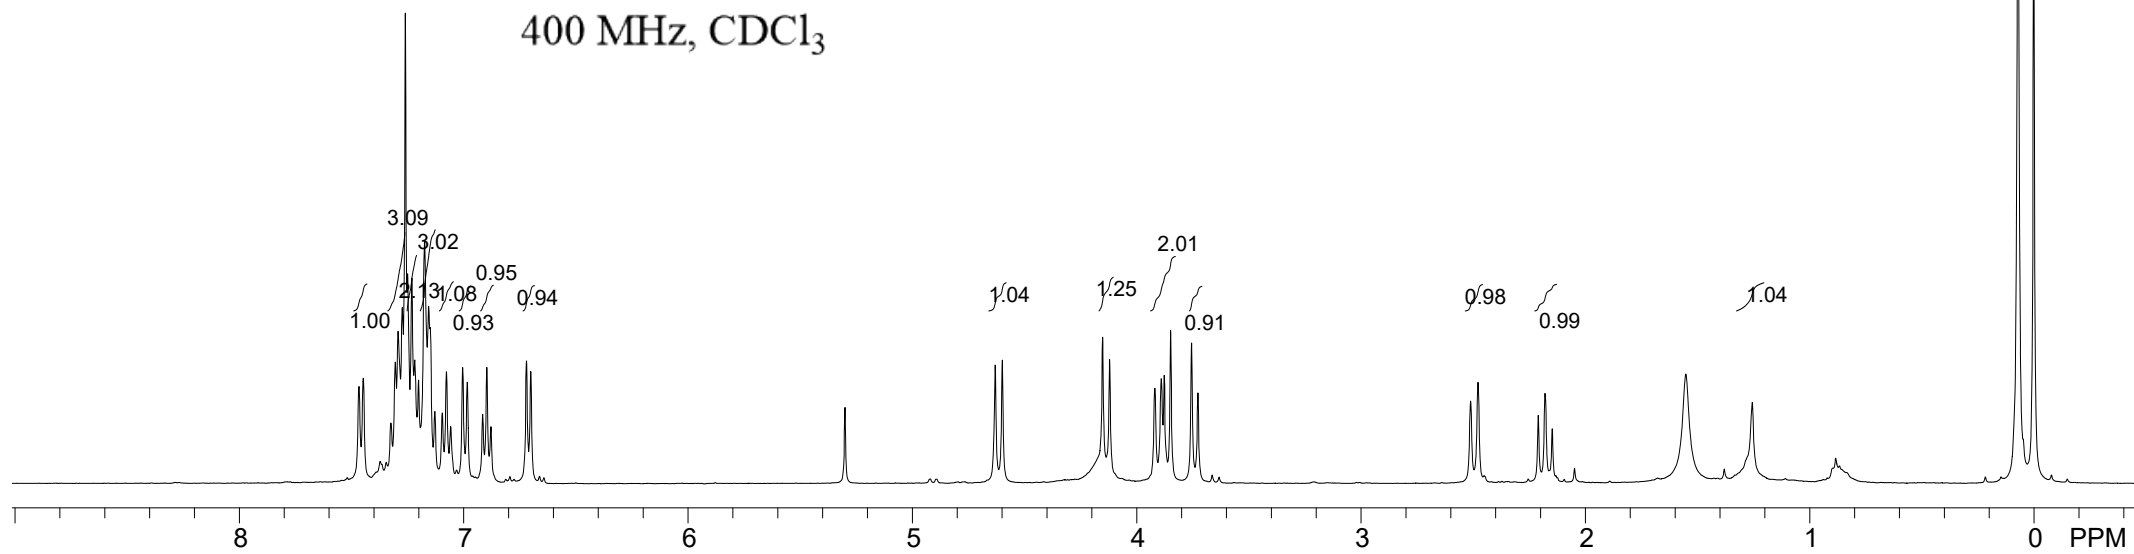

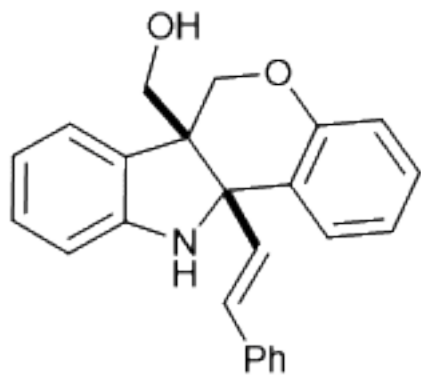

**2a**

100 MHz, CDCl<sub>3</sub>

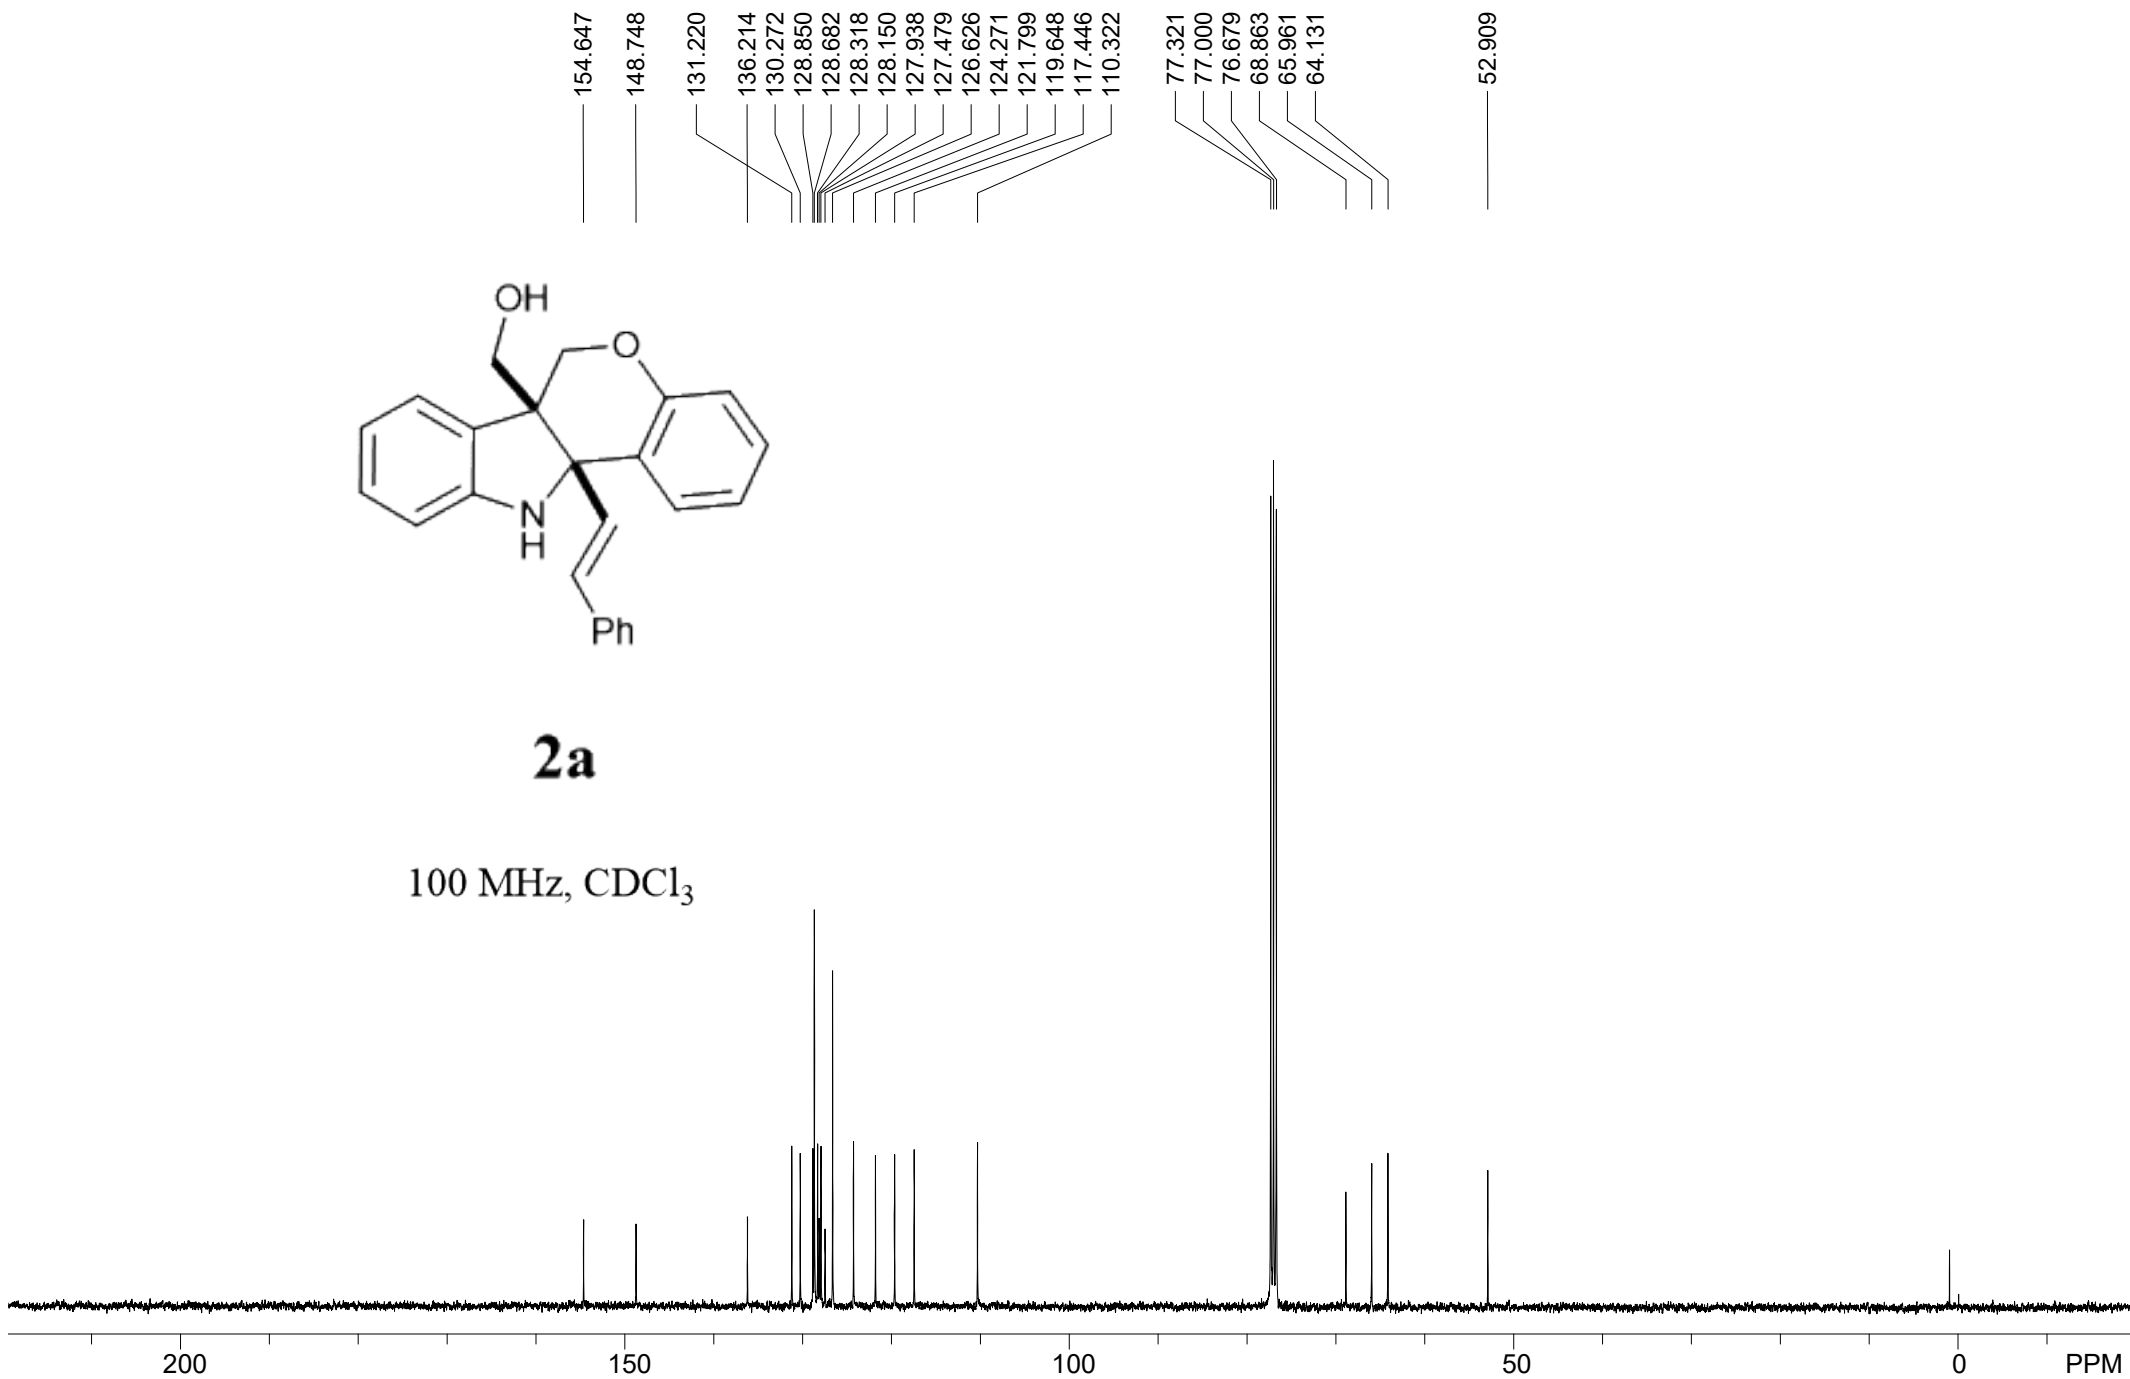

7.257  
7.228  
7.185  
7.173  
7.156  
7.136  
7.117  
7.096  
7.077  
7.059  
6.898  
6.880  
6.850  
6.830  
6.667  
6.649  
6.631  
6.369  
6.353  
6.331  
6.315  
6.274

4.286  
4.258  
4.124  
4.096  
3.874  
3.846  
3.734  
3.706

2.786

-0.000

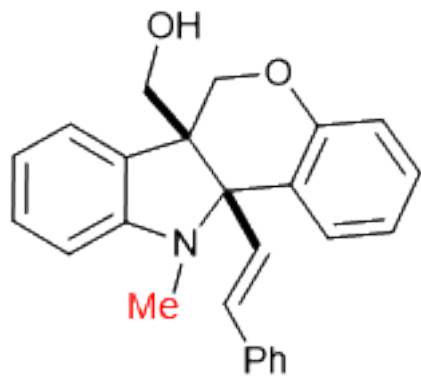

**2aa**

400 MHz, CDCl<sub>3</sub>

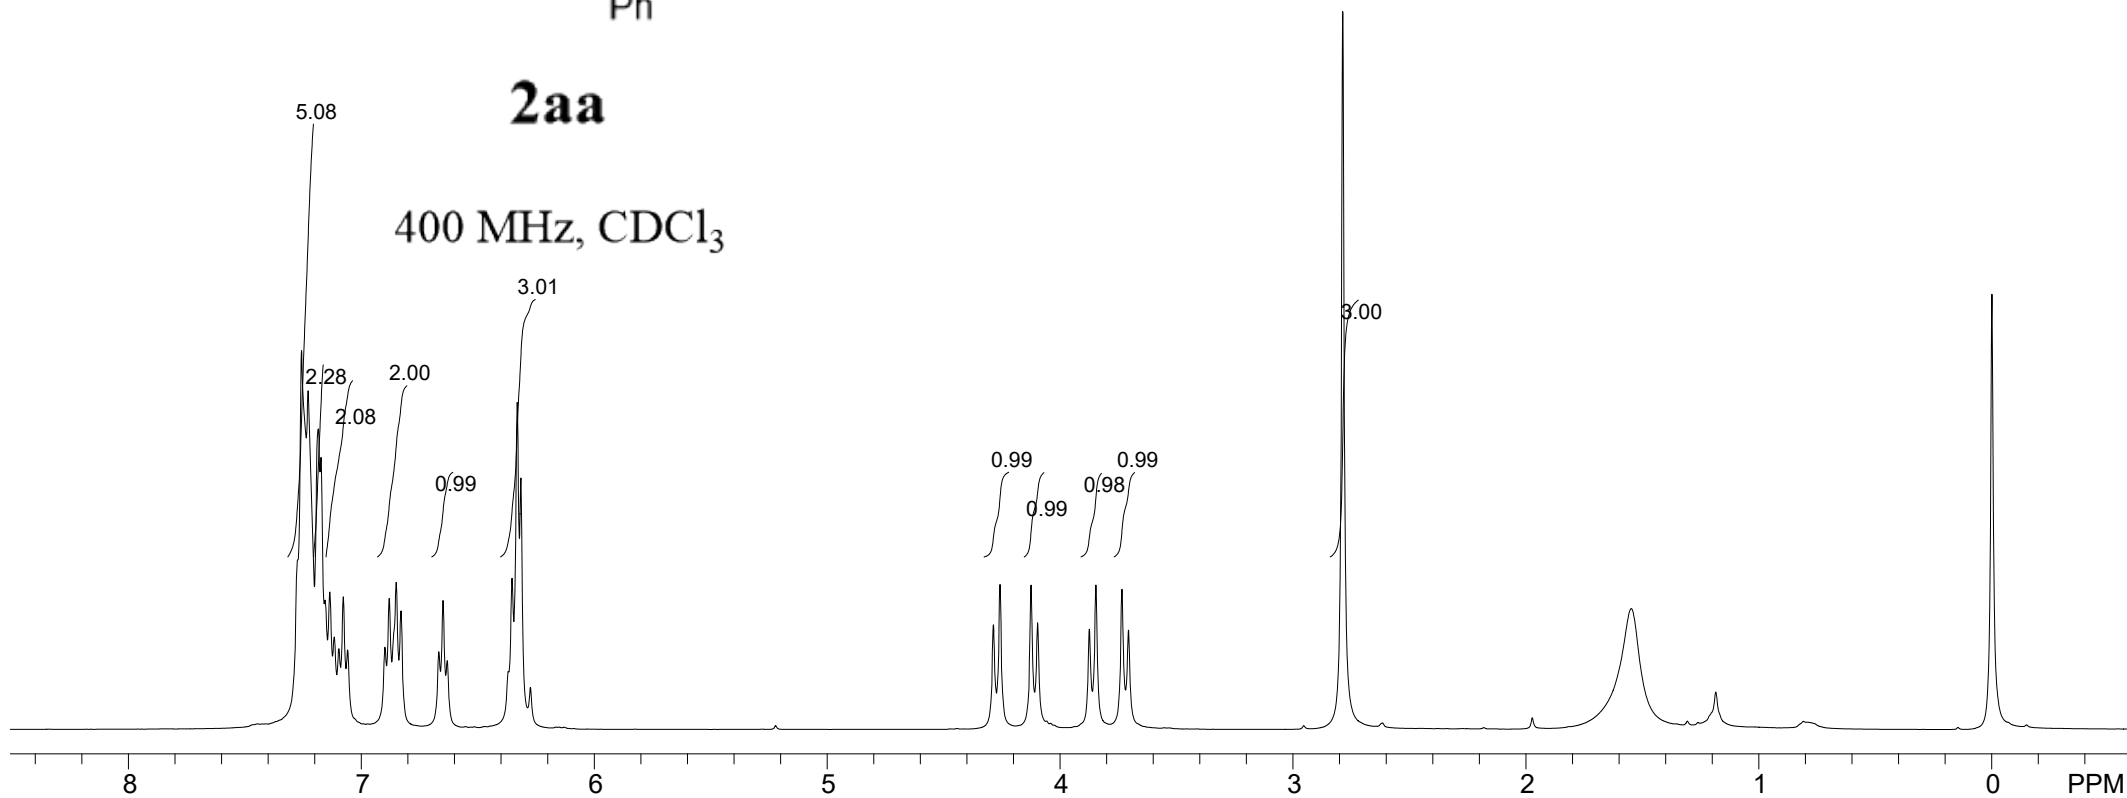

155.887  
150.535  
136.149  
134.705  
130.994  
129.200  
129.010  
128.930  
128.653  
128.011  
126.553  
123.943  
122.083  
120.370  
117.840  
117.759  
106.319

77.321  
77.000  
76.679  
73.165  
66.821  
63.729  
52.872  
29.751

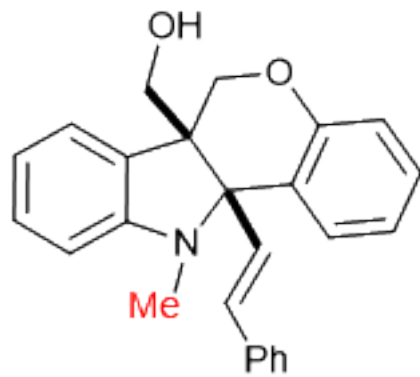

**2aa**

100 MHz, CDCl<sub>3</sub>

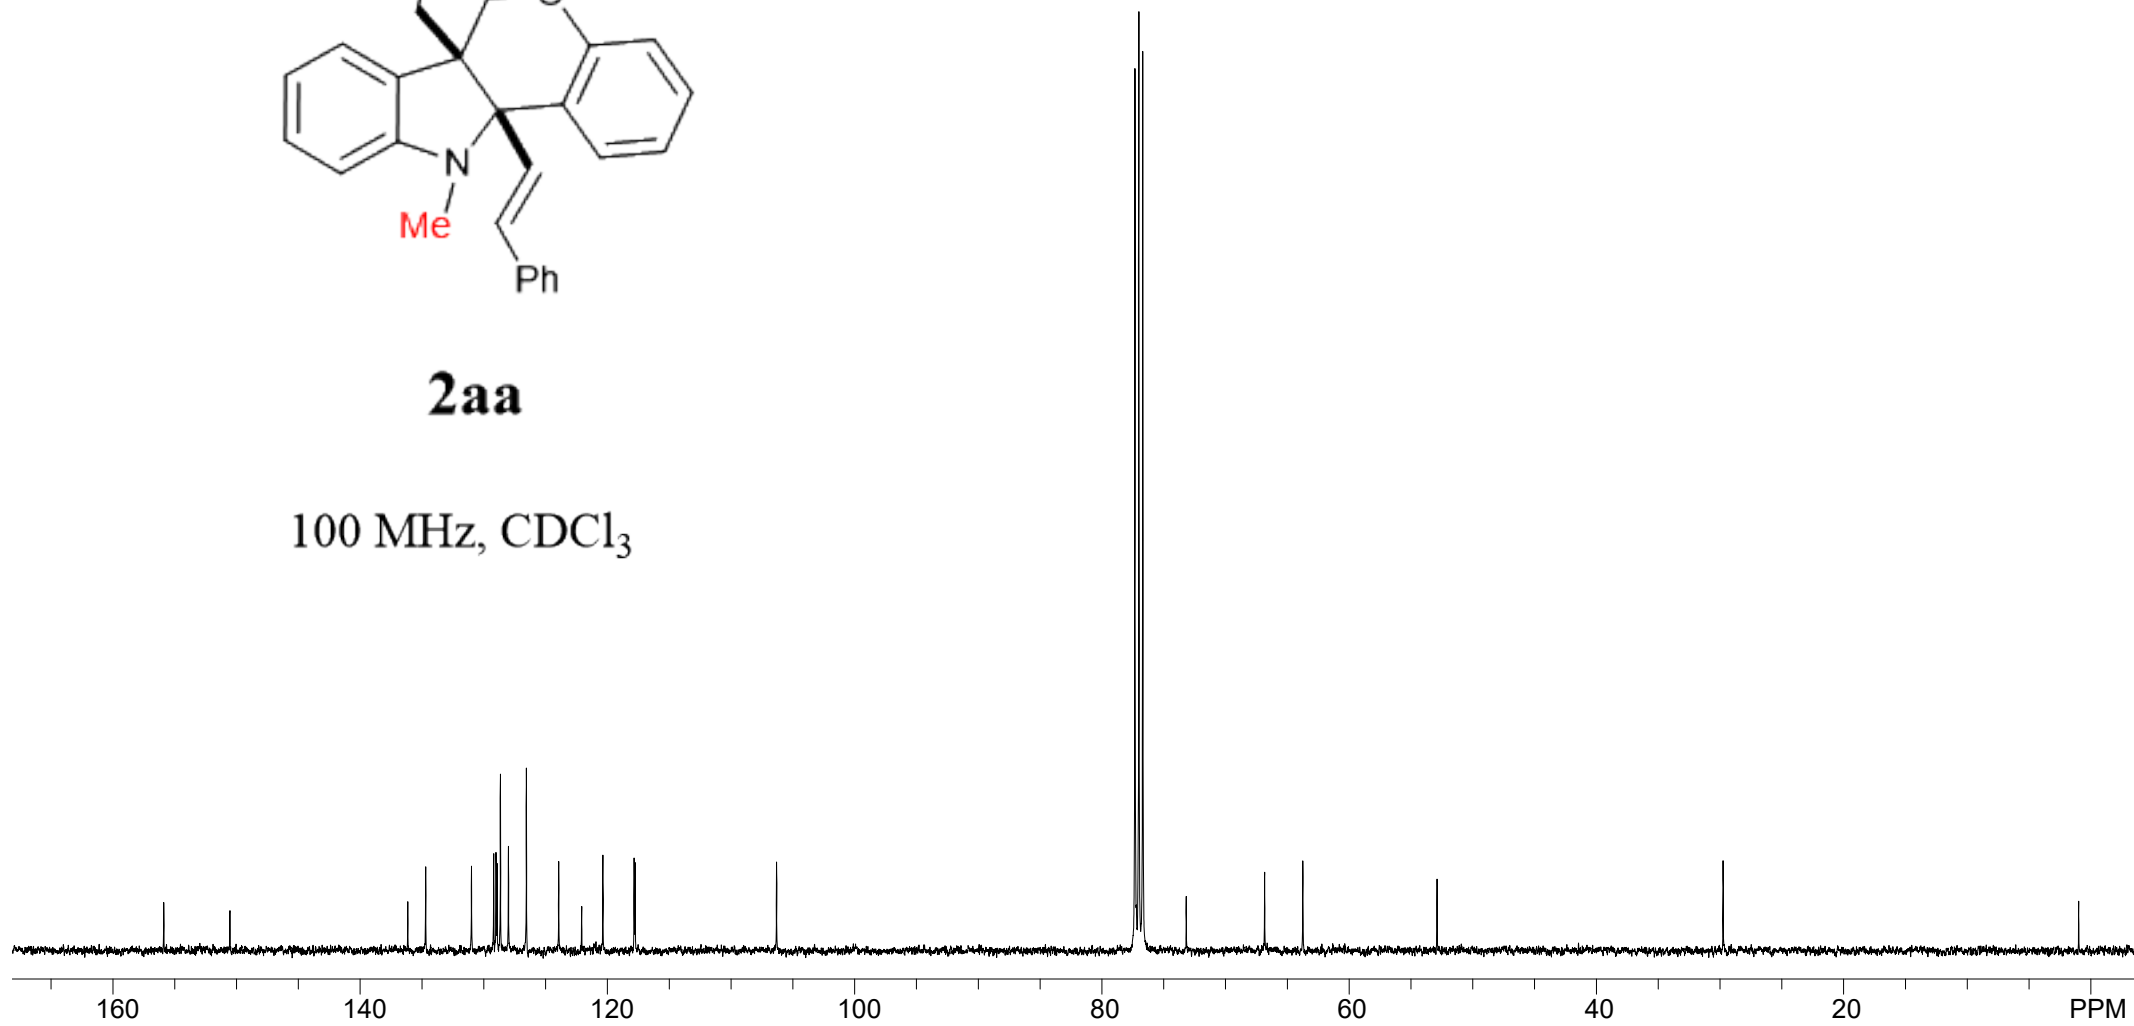

7.251  
7.232  
7.135  
7.115  
7.106  
7.086  
7.067  
7.048  
7.029  
6.935  
6.917  
6.899  
6.803  
6.784  
6.774  
6.754  
6.595  
6.576  
5.888  
5.873  
5.866  
5.850  
5.835  
5.819  
5.781  
5.742  
4.556  
4.527  
4.187  
4.139  
4.111  
3.762  
3.734  
3.633  
3.609

1.788  
1.773  
1.692

-0.000

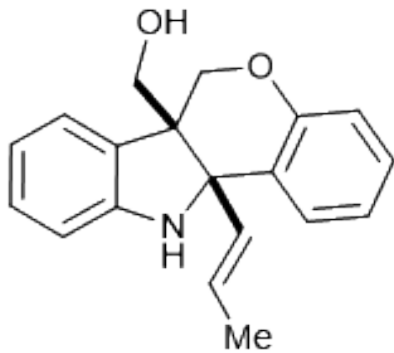

**2z**

400 MHz, CDCl<sub>3</sub>

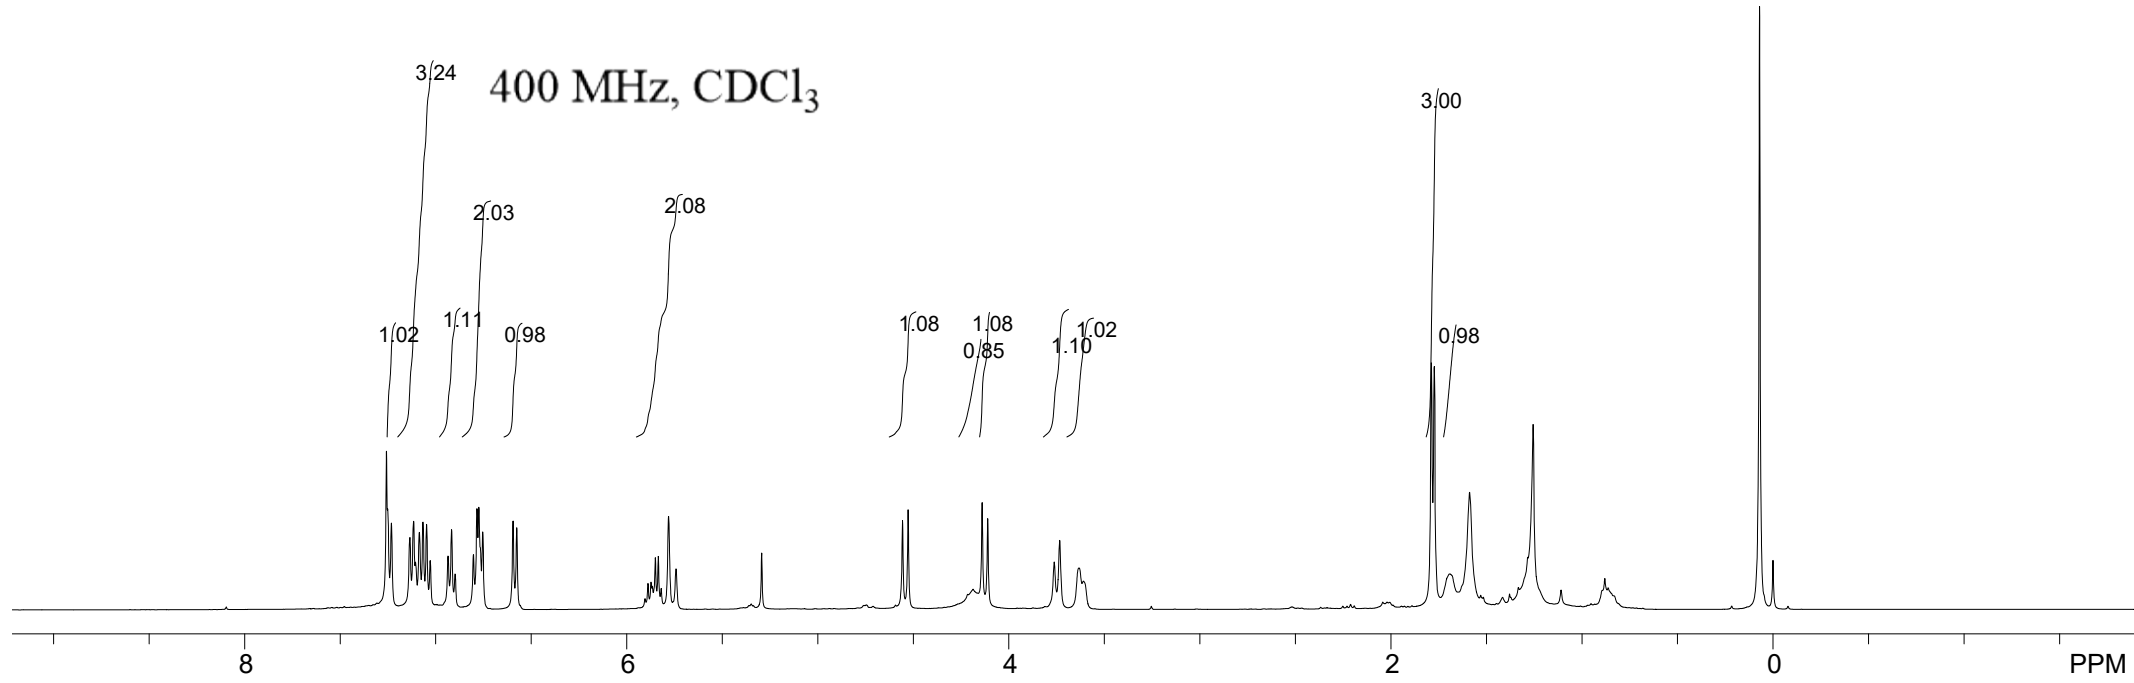

154.662  
148.938  
131.810  
128.711  
128.412  
128.288  
128.048  
127.866  
124.198  
121.551  
119.422  
117.235  
110.103

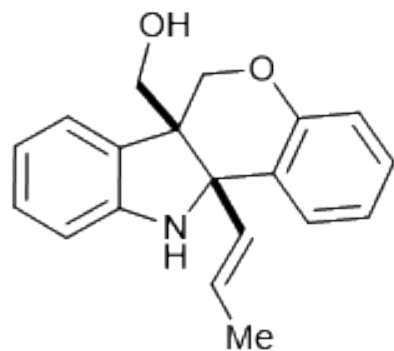

**2z**

100 MHz, CDCl<sub>3</sub>

77.314  
77.000  
76.678  
68.505  
65.800  
64.116  
52.267

17.815

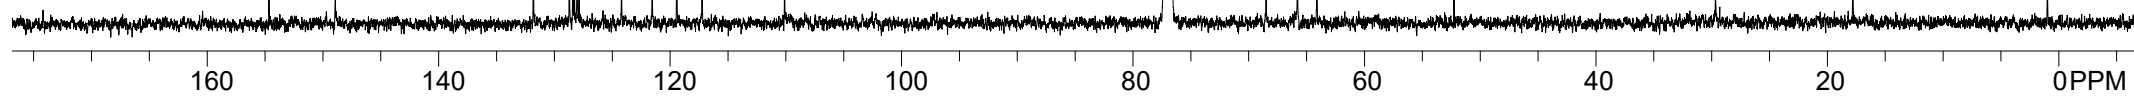

7.275  
7.256  
7.244  
7.239  
7.214  
7.193  
7.171  
7.119  
7.100  
7.079  
7.044  
7.024  
7.003  
6.984  
6.966  
6.946  
6.789  
6.771  
6.753  
6.695  
6.676

4.335  
4.321  
4.292  
4.225  
4.203  
4.060  
4.037  
3.913  
3.884  
3.820  
3.796  
3.113  
3.091

0.000

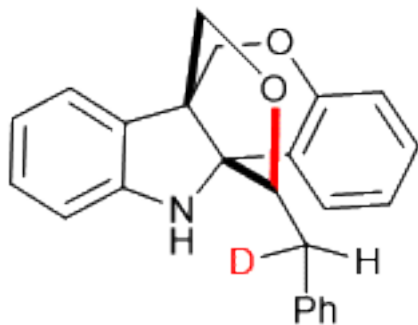

**D-3a**

400 MHz, CDCl<sub>3</sub>

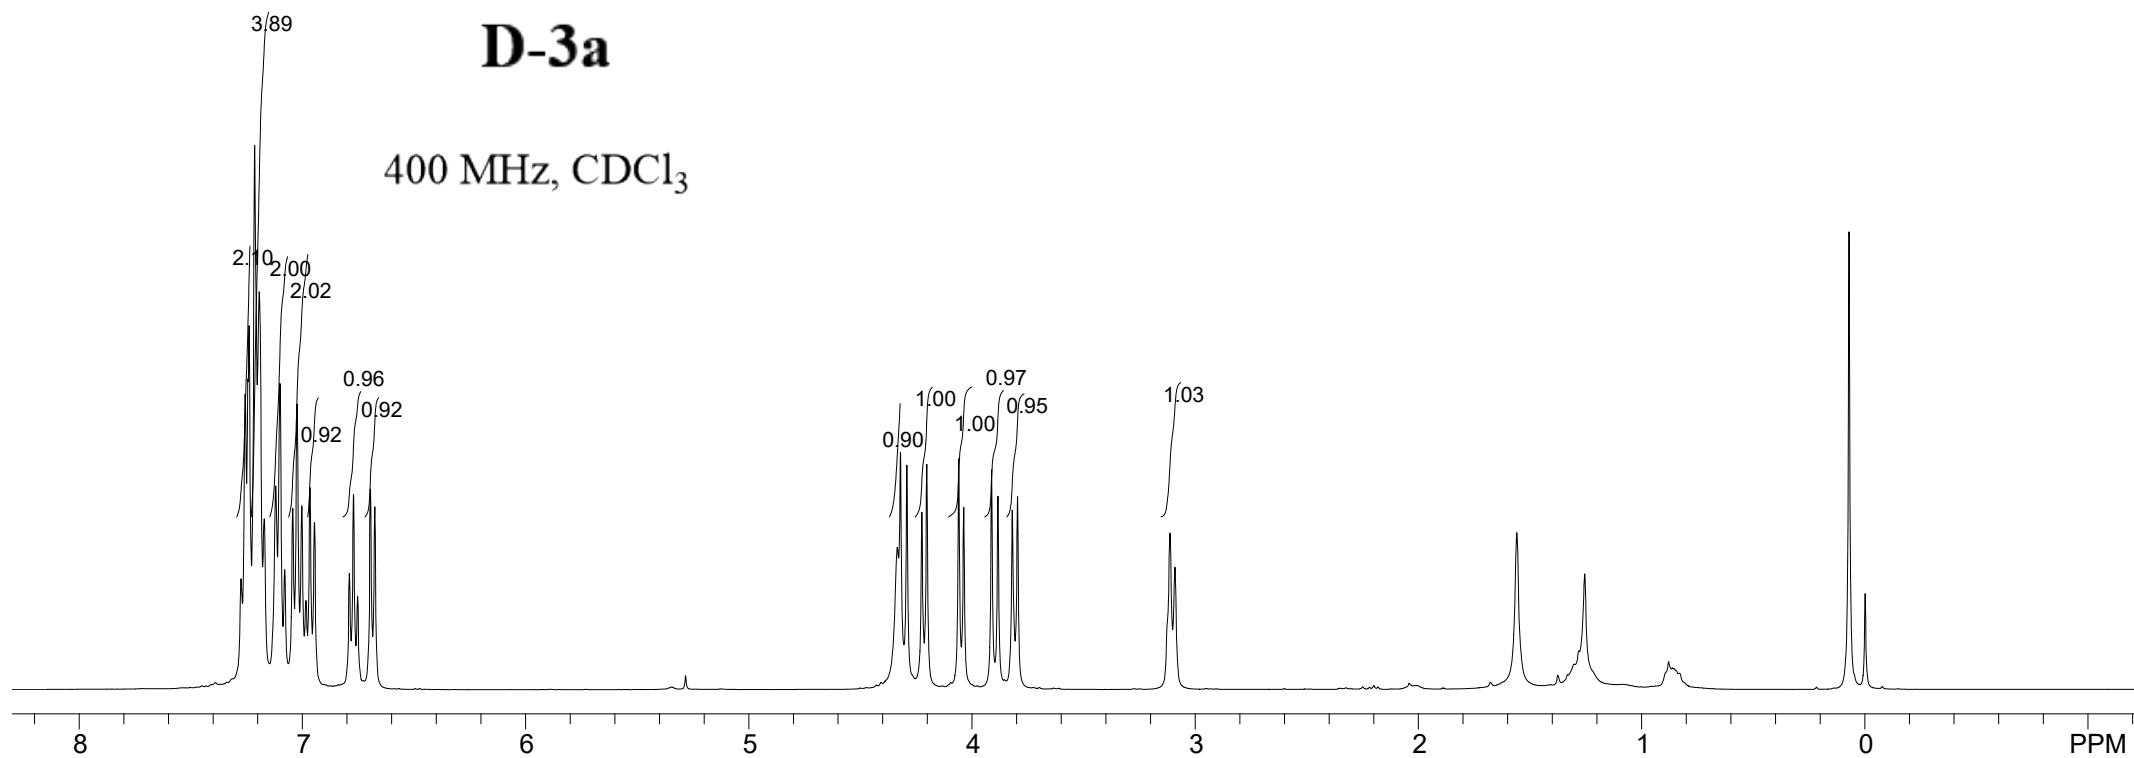

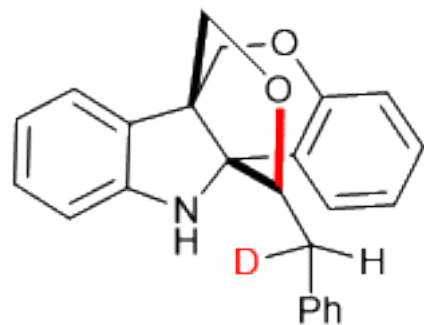

### D-3a

100 MHz, CDCl<sub>3</sub>

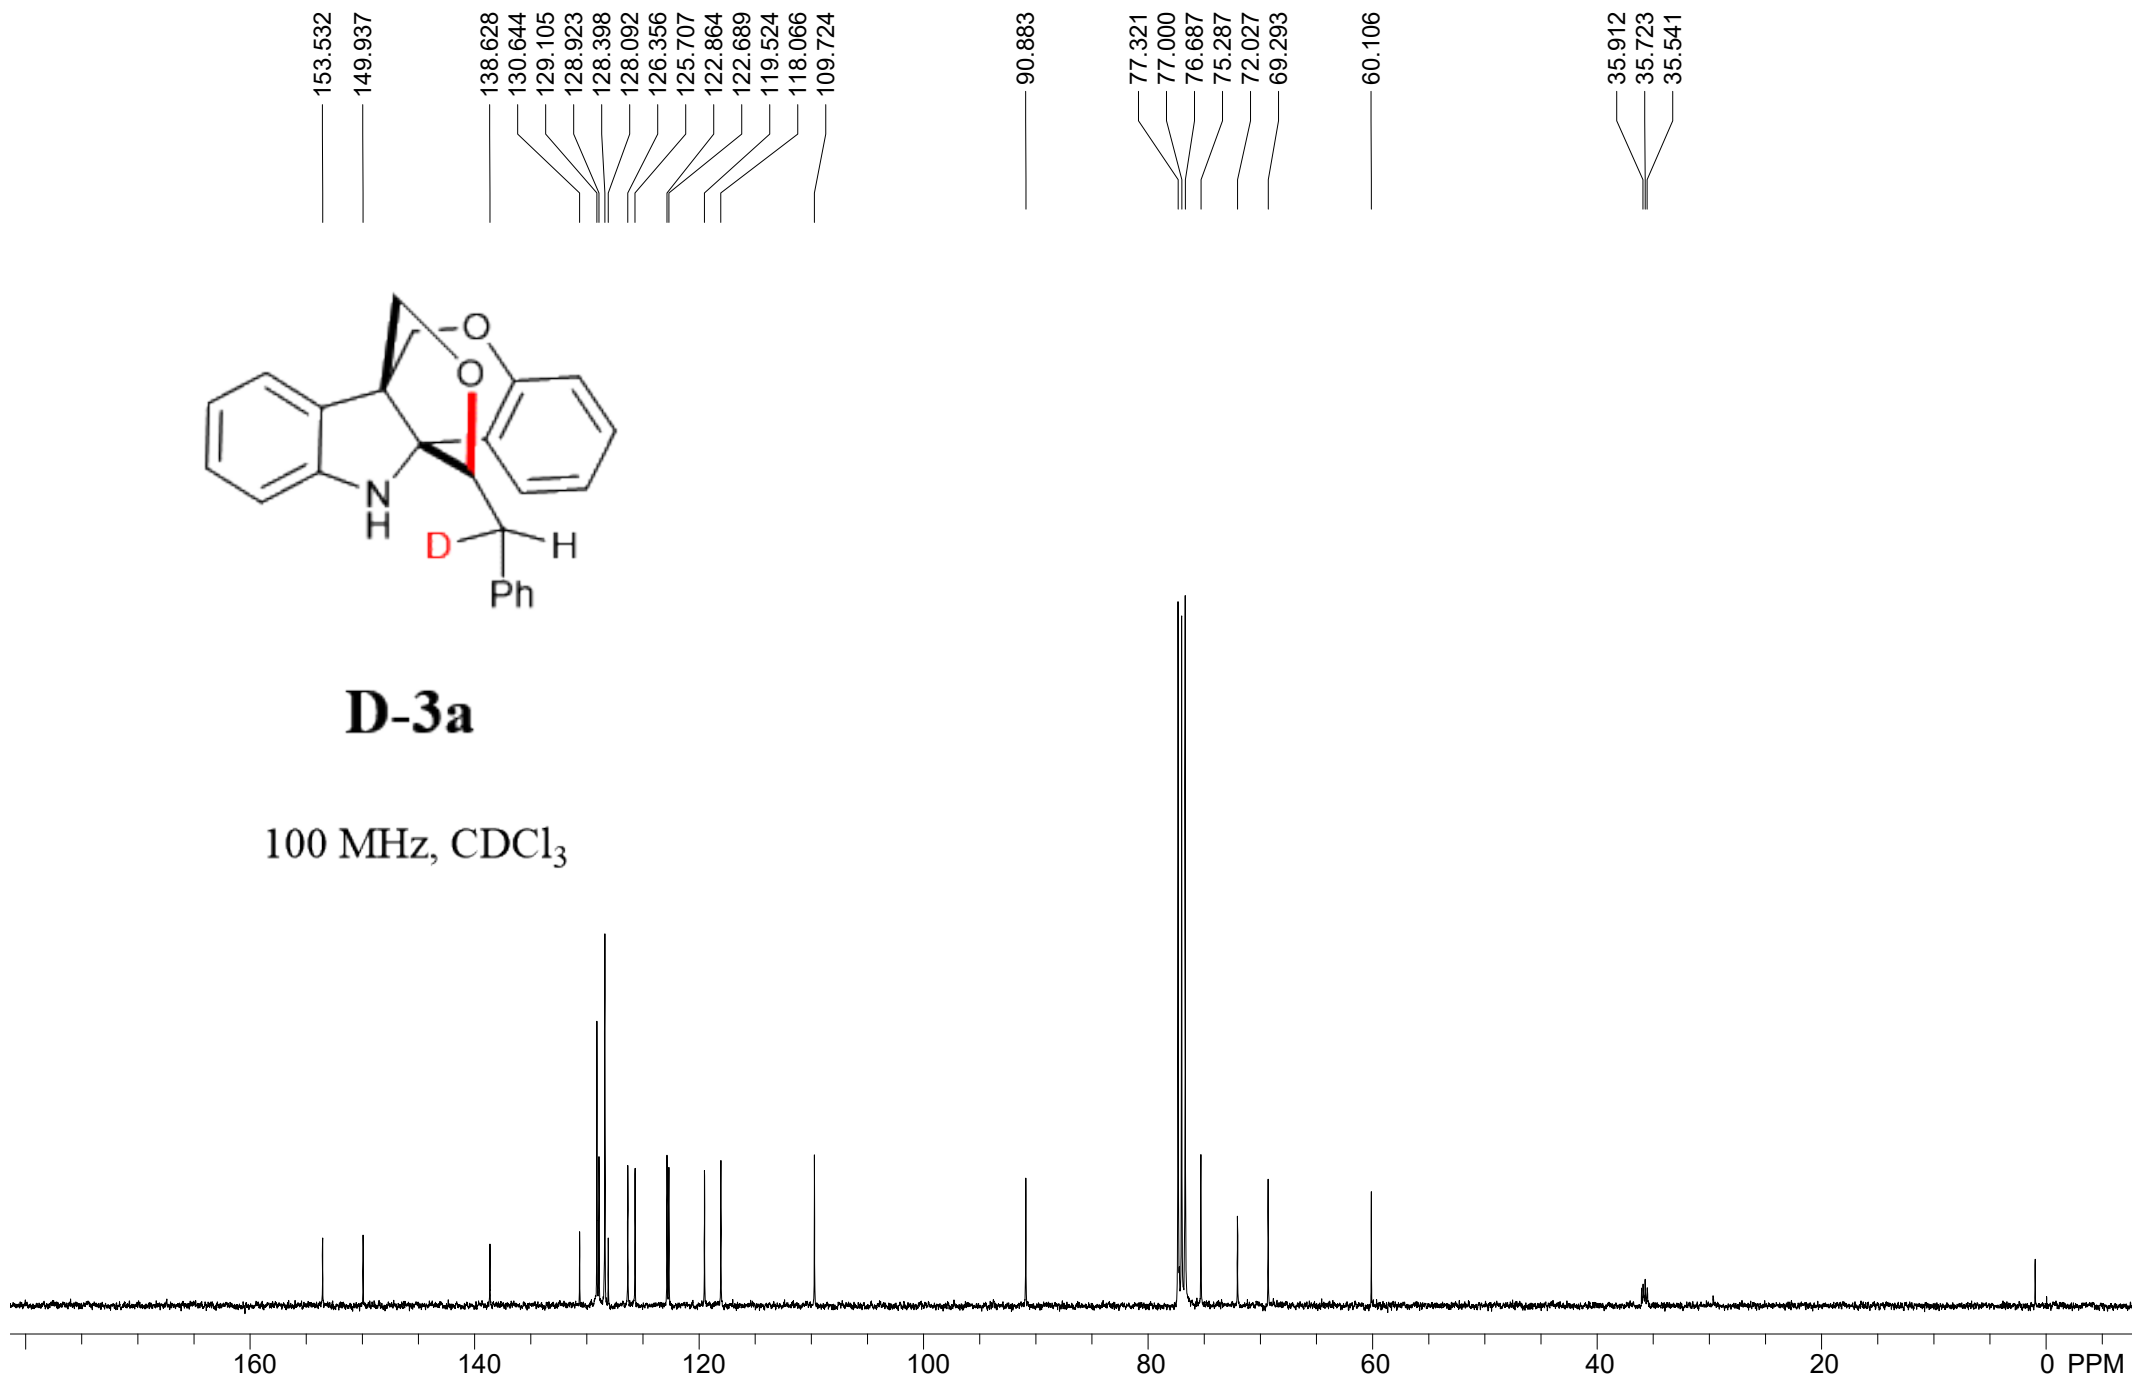

Supplement: d2gc02225g1.pdf [file d2gc02225g1.pdf]
